# Supplementary material
Source: PubMed Central journal article supplement (PMC3612915)
Supplement: neo1504_0435SD2.pdf [file neo1504_0435SD2.pdf]

## Supplementary table 1

| #  | ID      | Name     | SDHB.score | SDHD-AT.score | SDHD-HN.score | VHL.score |
|----|---------|----------|------------|---------------|---------------|-----------|
| 1  | 8083422 | SUCNR1   | -0.4745    | 0.0000        | 2.4472        | -0.3274   |
| 2  | 8149592 | SLC18A1  | 0.2856     | 0.0000        | -1.9280       | 0.2505    |
| 3  | 8131550 | SCIN     | -0.3408    | -0.1201       | 1.5567        | 0.0000    |
| 4  | 8145361 | NEFM     | 0.5240     | 0.0000        | -1.5368       | 0.0000    |
| 5  | 8106088 | CARTPT   | 0.1841     | 0.0708        | -1.4464       | 0.0448    |
| 6  | 8141228 | TMEM130  | 0.3512     | 0.3191        | -1.4239       | 0.0000    |
| 7  | 7908488 | CFHR1    | -0.4980    | -0.1660       | 1.2296        | 0.0060    |
| 8  | 8066619 | PLTP     | -0.4351    | -0.2268       | 1.2283        | 0.0000    |
| 9  | 7955873 | HOXC6    | 0.1687     | 0.0000        | -1.2245       | 0.1405    |
| 10 | 7921882 | OLFML2B  | -0.2517    | -0.2429       | 1.2210        | 0.0000    |
| 11 | 8103254 | SFRP2    | -0.0303    | -0.2294       | 1.2052        | -0.0360   |
| 12 | 8100827 | IGJ      | -0.3009    | -0.3292       | 1.1838        | 0.0000    |
| 13 | 7972650 | FGF14    | 0.0000     | 0.3845        | -1.1625       | 0.0000    |
| 14 | 7955865 | HOXC9    | 0.3121     | 0.0000        | -1.1374       | 0.0000    |
| 15 | 8157270 | SLC31A1  | 0.3957     | 0.0786        | -1.1319       | 0.0000    |
| 16 | 8051583 | CYP1B1   | -0.1530    | -0.1156       | 1.1255        | 0.0000    |
| 17 | 8112274 | ELOVL7   | 0.3322     | 0.2636        | 0.1126        | -1.1208   |
| 18 | 8063536 | TFAP2C   | -0.1724    | -0.1153       | -0.5728       | 1.1144    |
| 19 | 8143772 | RARRES2  | -0.3887    | -0.3005       | 0.0000        | 1.1129    |
| 20 | 8003667 | SERPINF1 | -0.2154    | -0.1013       | 1.0927        | 0.0000    |
| 21 | 7983630 | FGF7     | -0.2046    | -0.2040       | 1.0901        | 0.0000    |
| 22 | 8081001 | ROBO2    | 0.2228     | 0.0000        | -1.0873       | 0.0000    |
| 23 | 7978544 | EGLN3    | -0.3052    | -0.1304       | -0.2175       | 1.0866    |
| 24 | 8172670 | DGKK     | 0.0000     | 0.0000        | -1.0850       | 0.3562    |
| 25 | 8104035 | SORBS2   | 0.0000     | 0.0000        | -1.0710       | 0.1484    |
| 26 | 8091385 | CP       | -0.1640    | -0.0367       | 1.0654        | 0.0000    |
| 27 | 8152297 | ANGPT1   | -0.3798    | 0.0000        | 1.0644        | 0.0000    |
| 28 | 8159096 | DBH      | 0.0000     | 0.0009        | -1.0570       | 0.1104    |
| 29 | 7945712 | TH       | 0.0783     | 0.3412        | -1.0356       | 0.0000    |
| 30 | 8141140 | DLX5     | -0.2080    | 0.0000        | 1.0301        | 0.0000    |
| 31 | 7908459 | CFH      | -0.5299    | 0.0000        | 1.0285        | 0.0888    |
| 32 | 8120194 | TFAP2B   | 0.1013     | 0.0000        | -1.0181       | 0.1137    |
| 33 | 8080578 | CACNA2D3 | 0.0704     | 0.0000        | -1.0159       | 0.0531    |
| 34 | 8080511 | CACNA1D  | 0.0746     | 0.0000        | -1.0090       | 0.0600    |
| 35 | 8143766 | ARP11    | -0.1348    | -0.2562       | -0.3745       | 1.0054    |
| 36 | 8175234 | GPC3     | -0.2849    | -0.4990       | 0.0000        | 1.0035    |
| 37 | 7957140 | LGR5     | 0.0000     | 0.9695        | 0.3973        | -1.0035   |
| 38 | 8102232 | LEF1     | 0.0000     | -0.5365       | 0.9937        | 0.0000    |
| 39 | 8083260 | CPA3     | -0.3899    | 0.0000        | 0.9887        | 0.0000    |
| 40 | 8113234 | PCSK1    | 0.1303     | 0.0000        | -0.9867       | 0.0000    |
| 41 | 7907222 | PRRX1    | 0.0000     | -0.1561       | 0.9846        | 0.0000    |
| 42 | 8139087 | SFRP4    | -0.0222    | -0.0478       | 0.9795        | 0.0000    |
| 43 | 8043431 | IGKC     | -0.0689    | -0.1971       | 0.9764        | 0.0000    |
| 44 | 7923578 | FMOD     | -0.0982    | -0.1989       | 0.9746        | 0.0000    |
| 45 | 7925457 | RGS7     | 0.0124     | 0.0000        | -0.9746       | 0.0698    |
| 46 | 7905047 | FCGR1A   | -0.6210    | 0.0000        | 0.9723        | 0.2263    |
| 47 | 7993126 | ABAT     | 0.1742     | 0.1675        | -0.9722       | 0.0000    |
| 48 | 7979529 | KCNH5    | 0.0000     | 0.0000        | -0.9699       | 0.2250    |
| 49 | 8110932 | SEMA5A   | -0.0883    | 0.0000        | 0.9652        | 0.0000    |
| 50 | 8140668 | SEMA3A   | -0.1040    | 0.0000        | 0.9628        | 0.0000    |
| 51 | 8091511 | P2RY14   | -0.2385    | -0.0434       | 0.9540        | 0.0000    |
| 52 | 8176234 | CLIC2    | -0.3455    | 0.0000        | 0.9355        | 0.0000    |
| 53 | 8102938 | RNF150   | 0.0714     | 0.0000        | -0.9325       | 0.1060    |
| 54 | 8004408 | FGF11    | -0.2118    | -0.3416       | -0.0177       | 0.9317    |
| 55 | 8052355 | EFEMP1   | -0.2480    | -0.0387       | 0.9278        | 0.0000    |
| 56 | 7983867 | CGNL1    | -0.0917    | -0.8094       | 0.0000        | 0.9063    |
| 57 | 8120654 | KCNQ5    | 0.2579     | 0.2769        | -0.9037       | 0.0000    |
| 58 | 8176193 | F8       | -0.2166    | 0.0000        | -0.3053       | 0.9035    |
| 59 | 7919133 | FCGR1B   | -0.5366    | -0.0141       | 0.9028        | 0.1904    |
| 60 | 7905060 | FCGR1A   | -0.5276    | -0.0050       | 0.8999        | 0.1755    |

| #   | ID      | Name         | SDHB.score | SDHD-AT.score | SDHD-HN.score | VHL.score |
|-----|---------|--------------|------------|---------------|---------------|-----------|
| 61  | 7981718 | IGHM         | -0.1263    | -0.2170       | 0.8948        | 0.0000    |
| 62  | 7979269 | GCH1         | 0.2531     | 0.0296        | -0.8930       | 0.0000    |
| 63  | 7908481 | CFHR3        | -0.2306    | 0.0000        | 0.8905        | 0.0000    |
| 64  | 7968800 | DGKH         | -0.0675    | 0.0000        | 0.8893        | 0.0000    |
| 65  | 7940028 | SERPING1     | -0.4015    | -0.2176       | 0.8884        | 0.1062    |
| 66  | 8093839 | D4S234E      | 0.0287     | 0.0454        | -0.8860       | 0.0000    |
| 67  | 7961710 | ABCC9        | -0.6839    | -0.1143       | 0.1793        | 0.8858    |
| 68  | 7981732 | VSIG6        | -0.0936    | -0.2716       | 0.8804        | 0.0000    |
| 69  | 8173287 | VSIG4        | -0.5173    | 0.0000        | 0.8798        | 0.1446    |
| 70  | 8053690 | IGK@         | -0.0764    | -0.2357       | 0.8745        | 0.0000    |
| 71  | 8096440 | GRID2        | -0.0603    | 0.0000        | -0.5244       | 0.8736    |
| 72  | 8104066 | SORBS2       | 0.0000     | 0.0000        | -0.8730       | 0.2190    |
| 73  | 8091078 | RBP1         | 0.0000     | 0.0000        | -0.8714       | 0.1651    |
| 74  | 7946446 | NRIP3        | 0.0609     | 0.1335        | -0.8701       | 0.0000    |
| 75  | 8135488 | LRRN3        | 0.0000     | 0.0000        | -0.8686       | 0.1346    |
| 76  | 7907249 | FMO3         | -0.4936    | -0.1409       | 0.8685        | 0.2105    |
| 77  | 8057599 | TFPI         | -0.5262    | -0.1888       | 0.8670        | 0.2786    |
| 78  | 7933379 | PTPN20B      | 0.0000     | -0.3417       | -0.5401       | 0.8631    |
| 79  | 8043465 | IGKC         | -0.0351    | -0.3228       | 0.8620        | 0.0000    |
| 80  | 8150901 | PENK         | 0.0000     | 0.2875        | -0.8571       | 0.2013    |
| 81  | 7933263 | PTPN20A      | 0.0000     | -0.3248       | -0.5266       | 0.8547    |
| 82  | 7909681 | PROX1        | 0.2158     | 0.0550        | -0.8516       | 0.0000    |
| 83  | 7961580 | LMO3         | -0.1674    | 0.0000        | 0.8515        | 0.0000    |
| 84  | 8059580 | DNER         | 0.0905     | 0.0000        | -0.8489       | 0.0000    |
| 85  | 8123744 | F13A1        | -0.6542    | -0.1714       | 0.8440        | 0.4619    |
| 86  | 7933194 | CXCL12       | -0.2787    | 0.0000        | 0.8418        | 0.0000    |
| 87  | 7933437 | PTPN20A      | 0.0000     | -0.3217       | -0.5682       | 0.8410    |
| 88  | 8084382 | VWA5B2       | 0.4389     | 0.4145        | -0.8358       | -0.2811   |
| 89  | 8154295 | IL33         | -0.2962    | 0.0000        | 0.8355        | 0.0000    |
| 90  | 8118324 | C2           | -0.3098    | 0.0000        | 0.8338        | 0.0000    |
| 91  | 8179489 | ---          | -0.3254    | 0.0000        | 0.8264        | 0.0000    |
| 92  | 8178095 | C2           | -0.3258    | 0.0000        | 0.8254        | 0.0000    |
| 93  | 7950906 | CTSC         | -0.2838    | -0.0368       | 0.8246        | 0.0000    |
| 94  | 7957386 | ACSS3        | -0.4418    | -0.3273       | 0.8243        | 0.2520    |
| 95  | 7902808 | LOC339524    | -0.1303    | 0.0000        | 0.8238        | 0.0000    |
| 96  | 7971077 | POSTN        | -0.1108    | -0.0531       | 0.8229        | 0.0000    |
| 97  | 8105331 | GZMK         | -0.1072    | -0.0838       | 0.8211        | 0.0000    |
| 98  | 8140840 | STEAP4       | -0.4293    | -0.0296       | 0.8210        | 0.0993    |
| 99  | 8146794 | PREX2        | -0.3152    | -0.1644       | 0.8181        | 0.0054    |
| 100 | 8175195 | HS6ST2       | 0.0133     | 0.0189        | -0.8173       | 0.0000    |
| 101 | 7915472 | SLC2A1       | -0.1558    | 0.0000        | -0.3070       | 0.8158    |
| 102 | 8042942 | HK2          | -0.0835    | -0.1820       | -0.2359       | 0.8147    |
| 103 | 7966089 | CMKLR1       | -0.1497    | -0.0230       | 0.8135        | 0.0000    |
| 104 | 7937335 | IFITM1       | -0.3067    | -0.0987       | 0.8128        | 0.0000    |
| 105 | 7961059 | KLRB1        | -0.1316    | 0.0000        | 0.8120        | 0.0000    |
| 106 | 8139212 | GLI3         | -0.4582    | -0.5369       | 0.1088        | 0.8118    |
| 107 | 8016468 | HOXB7        | 0.1420     | 0.0000        | -0.8109       | 0.0000    |
| 108 | 7981724 | IGHD         | -0.0960    | -0.2909       | 0.8103        | 0.0000    |
| 109 | 7981728 | LOC100293211 | -0.0915    | -0.2764       | 0.8084        | 0.0000    |
| 110 | 7976488 | SERPINA5     | -0.2810    | 0.0000        | 0.0000        | 0.8080    |
| 111 | 7936590 | PRLHR        | 0.0471     | 0.1037        | -0.8059       | 0.0000    |
| 112 | 7933442 | PTPN20A      | 0.0000     | -0.2313       | -0.6758       | 0.8024    |
| 113 | 7981730 | IGLJ3        | -0.0940    | -0.2838       | 0.8023        | 0.0000    |
| 114 | 8074991 | GGT5         | -0.2176    | 0.0000        | 0.7982        | 0.0000    |
| 115 | 8144786 | SLC7A2       | -0.4070    | -0.1372       | 0.7977        | 0.1324    |
| 116 | 7909371 | CR1          | -0.3745    | 0.0000        | 0.7957        | 0.0000    |
| 117 | 8043468 | ---          | -0.0618    | -0.2097       | 0.7952        | 0.0000    |
| 118 | 8038213 | HSD17B14     | 0.3281     | 0.5837        | 0.0000        | -0.7943   |
| 119 | 8021685 | CCDC102B     | -0.3380    | 0.0000        | 0.7931        | 0.0000    |
| 120 | 8077879 | SYN2         | 0.4866     | 0.0000        | 0.0000        | -0.7924   |
| 121 | 7953603 | C1S          | -0.2625    | -0.0640       | 0.7916        | 0.0000    |
| 122 | 8117120 | ID4          | -0.2026    | 0.0000        | 0.7894        | 0.0000    |

| #   | ID      | Name         | SDHB.score | SDHD-AT.score | SDHD-HN.score | VHL.score |
|-----|---------|--------------|------------|---------------|---------------|-----------|
| 123 | 7910047 | DNAH14       | 0.6327     | 0.5914        | -0.5857       | -0.7850   |
| 124 | 7976322 | CHGA         | 0.0961     | 0.1301        | -0.7836       | 0.0000    |
| 125 | 8102532 | PDE5A        | -0.4046    | -0.1088       | 0.7836        | 0.1247    |
| 126 | 8166059 | TLR7         | -0.2034    | 0.0000        | 0.7801        | 0.0000    |
| 127 | 7921868 | FCGR3A       | -0.2857    | -0.0866       | 0.7783        | 0.0000    |
| 128 | 8043470 | ---          | -0.0345    | -0.1620       | 0.7782        | 0.0000    |
| 129 | 8045563 | ARHGAP15     | -0.4644    | 0.0000        | 0.7780        | 0.1366    |
| 130 | 7898805 | C1QB         | -0.3574    | 0.0000        | 0.7765        | 0.0068    |
| 131 | 8150962 | TOX          | -0.1980    | -0.1187       | 0.0000        | 0.7724    |
| 132 | 8146115 | C8orf4       | -0.5041    | 0.0000        | 0.0000        | 0.7717    |
| 133 | 8043449 | IGK@         | -0.0199    | -0.2139       | 0.7703        | 0.0000    |
| 134 | 8131719 | DNAH11       | -0.1135    | -0.0589       | -0.1863       | 0.7690    |
| 135 | 8113130 | MCTP1        | -0.2292    | 0.0000        | 0.7673        | 0.0000    |
| 136 | 7952785 | OPCML        | -0.0149    | -0.1890       | -0.3079       | 0.7672    |
| 137 | 7948455 | MS4A6A       | -0.4190    | 0.0000        | 0.7606        | 0.0480    |
| 138 | 8043476 | IGKC         | -0.0505    | -0.2257       | 0.7583        | 0.0000    |
| 139 | 8068671 | BACE2        | -0.0617    | -0.0386       | 0.7568        | 0.0000    |
| 140 | 7957260 | GLIPR1       | -0.3318    | 0.0000        | 0.7560        | 0.0000    |
| 141 | 8138489 | CDCA7L       | -0.1635    | -0.0727       | -0.0385       | 0.7536    |
| 142 | 7916112 | RAB3B        | 0.1045     | 0.7527        | -0.0456       | -0.4605   |
| 143 | 8135585 | LOC100128868 | -0.1194    | -0.2233       | 0.7505        | 0.0000    |
| 144 | 8022085 | DLGAP1       | 0.0000     | 0.0000        | 0.7436        | -0.0985   |
| 145 | 7965403 | LUM          | -0.2751    | 0.0000        | 0.7417        | 0.0000    |
| 146 | 8118158 | AIF1         | -0.4000    | 0.0000        | 0.7412        | 0.0000    |
| 147 | 8035351 | JAK3         | -0.1758    | -0.1904       | 0.7402        | 0.0000    |
| 148 | 7962274 | KIF21A       | 0.1963     | 0.0000        | -0.7393       | 0.0000    |
| 149 | 7934936 | SLC16A12     | -0.1920    | -0.0519       | 0.0000        | 0.7386    |
| 150 | 7960744 | C1R          | -0.2358    | -0.1128       | 0.7384        | 0.0000    |
| 151 | 8147000 | ZFHX4        | 0.0000     | 0.0000        | -0.7381       | 0.1884    |
| 152 | 8103544 | SPOCK3       | 0.0000     | 0.0000        | -0.7370       | 0.0847    |
| 153 | 7959330 | WDR66        | -0.2802    | 0.0000        | 0.0000        | 0.7368    |
| 154 | 7961829 | BCAT1        | -0.0318    | -0.4156       | -0.0479       | 0.7353    |
| 155 | 8113358 | ST8SIA4      | -0.2565    | -0.0131       | 0.7337        | 0.0000    |
| 156 | 8039257 | LAIR1        | -0.2642    | -0.1052       | 0.7334        | 0.0000    |
| 157 | 7896710 | ---          | -0.3443    | -0.1101       | 0.7329        | 0.0729    |
| 158 | 7929511 | ENTPD1       | -0.3087    | -0.1017       | 0.7329        | 0.0197    |
| 159 | 8155930 | GCNT1        | -0.1245    | 0.0000        | 0.7311        | 0.0000    |
| 160 | 8173551 | PHKA1        | 0.1550     | 0.0000        | -0.7305       | 0.0000    |
| 161 | 8104068 | ---          | 0.0000     | 0.0000        | -0.7294       | 0.1819    |
| 162 | 8173745 | CYSLTR1      | -0.3896    | 0.0000        | 0.7276        | 0.0595    |
| 163 | 8084717 | ST6GAL1      | -0.4462    | 0.0000        | 0.7276        | 0.1504    |
| 164 | 8151310 | EYA1         | -0.2093    | 0.0000        | -0.3172       | 0.7251    |
| 165 | 7904408 | HSD3B2       | -0.2674    | 0.0000        | 0.0000        | 0.7235    |
| 166 | 8171921 | DMD          | -0.3257    | -0.3341       | 0.0000        | 0.7173    |
| 167 | 8023727 | DSEL         | -0.3036    | 0.0000        | -0.0271       | 0.7148    |
| 168 | 7979524 | TMEM30B      | 0.0000     | 0.0000        | 0.7145        | -0.0283   |
| 169 | 8096511 | BMPR1B       | 0.0000     | 0.0000        | -0.7137       | 0.1085    |
| 170 | 8163908 | GGTA1        | -0.4655    | 0.0000        | 0.7137        | 0.1218    |
| 171 | 8031076 | CACNG7       | 0.1094     | 0.2007        | 0.0000        | -0.7137   |
| 172 | 8081710 | SIDT1        | 0.0000     | 0.4316        | -0.7136       | 0.0000    |
| 173 | 7980485 | DIO2         | -0.1311    | -0.0617       | 0.7134        | 0.0000    |
| 174 | 7981740 | IGHA1        | -0.0914    | -0.1447       | 0.7130        | 0.0000    |
| 175 | 8163202 | SVEP1        | -0.2948    | -0.3592       | 0.7129        | 0.1317    |
| 176 | 8135576 | TES          | 0.0000     | -0.2710       | 0.7120        | 0.0000    |
| 177 | 8017867 | FAM20A       | -0.1954    | -0.1434       | 0.7118        | 0.0000    |
| 178 | 8115147 | CD74         | -0.4300    | 0.0000        | 0.7113        | 0.1016    |
| 179 | 8033257 | C3           | -0.2502    | -0.0500       | 0.7081        | 0.0000    |
| 180 | 8146934 | LY96         | -0.3147    | 0.0000        | 0.7060        | 0.0000    |
| 181 | 8127854 | ME1          | 0.0682     | 0.0000        | -0.7054       | 0.0000    |
| 182 | 8109663 | GABRA1       | 0.0000     | 0.7052        | -0.0756       | -0.2623   |
| 183 | 8137483 | FLJ16734     | -0.0429    | 0.0000        | -0.3565       | 0.7048    |
| 184 | 7898799 | C1QC         | -0.3504    | 0.0000        | 0.7024        | 0.0106    |

| #   | ID      | Name     | SDHB.score | SDHD-AT.score | SDHD-HN.score | VHL.score |
|-----|---------|----------|------------|---------------|---------------|-----------|
| 185 | 8170602 | ZNF185   | -0.1103    | -0.0657       | -0.0803       | 0.7024    |
| 186 | 7919815 | CTSK     | -0.0649    | 0.0000        | 0.7021        | 0.0000    |
| 187 | 8114536 | TMEM173  | -0.3362    | 0.0000        | 0.7012        | 0.0042    |
| 188 | 7894124 | ---      | 0.3034     | -0.7007       | 0.0000        | 0.0000    |
| 189 | 8105077 | CARD6    | -0.3544    | 0.0000        | 0.7000        | 0.0242    |
| 190 | 8135218 | LRRCL17  | -0.3252    | 0.0000        | 0.6967        | 0.0000    |
| 191 | 8131927 | MPP6     | 0.2482     | 0.6410        | 0.0000        | -0.6963   |
| 192 | 8115368 | NMUR2    | -0.1607    | 0.0000        | -0.2103       | 0.6941    |
| 193 | 7972661 | ---      | 0.0000     | 0.0000        | -0.6939       | 0.0347    |
| 194 | 7981322 | RTL1     | 0.0000     | 0.0000        | -0.6927       | 0.0607    |
| 195 | 8115076 | CSF1R    | -0.4104    | 0.0000        | 0.6925        | 0.1036    |
| 196 | 8089544 | CCDC80   | -0.0318    | -0.2349       | 0.6922        | 0.0000    |
| 197 | 8091530 | P2RY12   | -0.0927    | 0.0000        | 0.6909        | 0.0000    |
| 198 | 7912692 | HSPB7    | -0.3878    | 0.0000        | 0.0000        | 0.6896    |
| 199 | 7904287 | CD2      | -0.0457    | -0.0173       | 0.6885        | 0.0000    |
| 200 | 7910030 | DNAH14   | 0.6427     | 0.4437        | -0.6602       | -0.6848   |
| 201 | 8152617 | HAS2     | -0.1114    | -0.0839       | 0.6833        | 0.0000    |
| 202 | 7922337 | TNFSF18  | -0.1943    | 0.0000        | 0.6826        | 0.0000    |
| 203 | 7962000 | PTHLH    | -0.1121    | -0.0768       | -0.0338       | 0.6814    |
| 204 | 8090193 | HEG1     | -0.2641    | -0.0589       | 0.6814        | 0.0000    |
| 205 | 8008564 | TOM1L1   | 0.2343     | 0.0000        | -0.6800       | 0.0000    |
| 206 | 7940226 | MS4A2    | -0.1959    | -0.0321       | 0.6796        | 0.0000    |
| 207 | 7924987 | AGT      | -0.3028    | 0.0000        | 0.6752        | 0.0000    |
| 208 | 7961075 | CD69     | -0.2811    | -0.0068       | 0.6743        | 0.0000    |
| 209 | 8143790 | TMEM176B | -0.4017    | -0.3099       | 0.0354        | 0.6739    |
| 210 | 8151447 | IL7      | 0.0000     | 0.0000        | 0.6731        | -0.2259   |
| 211 | 8113726 | PPIC     | 0.0000     | 0.0000        | 0.6716        | -0.0318   |
| 212 | 8017378 | CYB561   | 0.1578     | 0.0002        | -0.6715       | 0.0000    |
| 213 | 8043459 | IGKC     | -0.0127    | -0.1550       | 0.6711        | 0.0000    |
| 214 | 7955887 | HOXC5    | 0.2492     | 0.0000        | -0.6707       | 0.0000    |
| 215 | 8085984 | OSBPL10  | -0.1842    | -0.1028       | 0.6697        | 0.0000    |
| 216 | 8109333 | GPX3     | -0.4516    | 0.0000        | 0.0000        | 0.6686    |
| 217 | 7922200 | SELP     | -0.1757    | 0.0000        | 0.6677        | 0.0000    |
| 218 | 8054479 | MALL     | -0.0712    | 0.0000        | 0.6669        | 0.0000    |
| 219 | 7912646 | CASP9    | -0.2067    | 0.0000        | -0.3214       | 0.6669    |
| 220 | 8122334 | CCRL1    | -0.0547    | 0.0000        | 0.6661        | 0.0000    |
| 221 | 8160321 | SLC24A2  | 0.0000     | 0.1265        | -0.6660       | 0.0583    |
| 222 | 8118409 | C4A      | -0.3488    | -0.3164       | 0.6630        | 0.2174    |
| 223 | 8081810 | GAP43    | -0.0034    | 0.0000        | 0.6615        | 0.0000    |
| 224 | 8149835 | NEFL     | 0.3737     | 0.0000        | -0.6566       | -0.0679   |
| 225 | 8103508 | MARCH1   | -0.2276    | -0.1345       | 0.6542        | 0.0000    |
| 226 | 8165817 | GYG2     | 0.0449     | 0.6534        | -0.1790       | -0.2501   |
| 227 | 8128843 | DDO      | -0.1809    | 0.0000        | 0.0000        | 0.6533    |
| 228 | 8121588 | DSE      | -0.3626    | -0.0472       | 0.6522        | 0.1190    |
| 229 | 7908397 | RGS13    | -0.2370    | 0.0000        | 0.6516        | 0.0000    |
| 230 | 8009243 | C17orf60 | -0.3674    | 0.0000        | 0.6512        | 0.0803    |
| 231 | 8174654 | KLHL13   | 0.1633     | 0.0000        | -0.6504       | 0.0000    |
| 232 | 8008547 | TOM1L1   | 0.1610     | 0.0000        | -0.6503       | 0.0000    |
| 233 | 7931914 | IL2RA    | -0.3133    | 0.0000        | 0.6501        | 0.0136    |
| 234 | 7995714 | SLC6A2   | 0.0000     | 0.3103        | -0.6492       | 0.1056    |
| 235 | 8156783 | COL15A1  | -0.2327    | -0.4537       | 0.6489        | 0.1288    |
| 236 | 8102200 | DKK2     | 0.0000     | 0.0000        | 0.6487        | -0.0584   |
| 237 | 8057578 | CALCRL   | -0.4364    | 0.0000        | 0.6485        | 0.1023    |
| 238 | 8095246 | ARL9     | 0.0000     | 0.0000        | 0.6478        | 0.0000    |
| 239 | 8081590 | PHLDB2   | -0.3218    | -0.0292       | 0.6468        | 0.0574    |
| 240 | 8120961 | MRAP2    | 0.1264     | 0.0000        | -0.6466       | 0.0000    |
| 241 | 8022612 | ZNF521   | -0.1231    | -0.3077       | 0.6460        | 0.0000    |
| 242 | 7896697 | ---      | -0.1122    | -0.0155       | 0.6447        | 0.0000    |
| 243 | 7906720 | FCER1G   | -0.3495    | 0.0000        | 0.6432        | 0.0000    |
| 244 | 8163116 | EPB41L4B | -0.1055    | 0.0000        | -0.4720       | 0.6426    |
| 245 | 8159919 | C9orf68  | 0.0000     | 0.0000        | -0.3617       | 0.6426    |
| 246 | 8134036 | STEAP2   | 0.1765     | 0.0000        | 0.0000        | -0.6425   |

| #   | ID      | Name         | SDHB.score | SDHD-AT.score | SDHD-HN.score | VHL.score |
|-----|---------|--------------|------------|---------------|---------------|-----------|
| 247 | 7893343 | ---          | 0.0000     | -0.6413       | 0.0000        | 0.1303    |
| 248 | 8106827 | GPR98        | 0.0000     | 0.5422        | 0.5001        | -0.6413   |
| 249 | 8143781 | GIMAP6       | -0.2375    | 0.0000        | 0.6409        | 0.0000    |
| 250 | 8169158 | CXorf57      | 0.0000     | 0.0315        | -0.6396       | 0.0000    |
| 251 | 7914270 | LAPTM5       | -0.2243    | -0.0184       | 0.6391        | 0.0000    |
| 252 | 8096808 | CCDC109B     | 0.0000     | -0.0397       | 0.6388        | 0.0000    |
| 253 | 7938225 | OLFML1       | -0.3480    | 0.0000        | 0.6387        | 0.0816    |
| 254 | 7983779 | UNC13C       | -0.0504    | 0.0000        | 0.6382        | -0.0277   |
| 255 | 7967544 | SCARB1       | -0.1070    | 0.0000        | -0.4747       | 0.6381    |
| 256 | 8059905 | COL6A3       | -0.1149    | -0.2697       | 0.6368        | 0.0000    |
| 257 | 8081081 | EPHA3        | 0.0000     | 0.0000        | 0.6365        | -0.0816   |
| 258 | 8178220 | HLA-DPB1     | -0.2303    | 0.0000        | 0.6365        | 0.0000    |
| 259 | 7898793 | C1QA         | -0.2968    | -0.0108       | 0.6360        | 0.0210    |
| 260 | 8040430 | VSNL1        | 0.0530     | 0.6350        | -0.3937       | -0.1206   |
| 261 | 8151496 | ZNF704       | 0.0983     | 0.0000        | -0.6349       | 0.0000    |
| 262 | 8138745 | HOXA7        | 0.2142     | 0.0000        | -0.6346       | 0.0000    |
| 263 | 7995263 | IGHA1        | -0.0320    | -0.1336       | 0.6341        | 0.0000    |
| 264 | 8114845 | PRELID2      | -0.0981    | 0.0000        | -0.2486       | 0.6340    |
| 265 | 8111255 | CDH10        | 0.4633     | 0.5466        | -0.4193       | -0.6322   |
| 266 | 8034873 | EMR2         | -0.2367    | -0.0882       | 0.6321        | 0.0000    |
| 267 | 8131506 | NXPH1        | 0.0000     | 0.2520        | -0.6320       | 0.0000    |
| 268 | 8166730 | CYBB         | -0.4777    | 0.0000        | 0.6316        | 0.2309    |
| 269 | 7943892 | NCAM1        | 0.3235     | 0.0000        | -0.6315       | 0.0000    |
| 270 | 8081564 | CD96         | -0.0615    | -0.1313       | 0.6310        | 0.0000    |
| 271 | 8001104 | LOC100290146 | -0.0231    | -0.1784       | 0.6307        | 0.0000    |
| 272 | 7986509 | C15orf51     | -0.3773    | 0.0000        | 0.0000        | 0.6301    |
| 273 | 8179481 | HLA-DRA      | -0.3843    | 0.0000        | 0.6299        | 0.0989    |
| 274 | 8150978 | CA8          | 0.0000     | 0.0000        | -0.6288       | 0.0000    |
| 275 | 8046333 | CYBRD1       | -0.3299    | 0.0000        | 0.6285        | 0.0556    |
| 276 | 8161755 | ALDH1A1      | -0.6113    | 0.0000        | 0.1425        | 0.6279    |
| 277 | 8059680 | HTR2B        | -0.1527    | 0.0000        | 0.6274        | 0.0000    |
| 278 | 7928218 | CDH23        | -0.3294    | 0.0000        | 0.0000        | 0.6272    |
| 279 | 8130867 | THBS2        | -0.1283    | -0.0901       | 0.6272        | 0.0000    |
| 280 | 7961532 | ARHGDI1      | -0.3840    | 0.0000        | 0.6271        | 0.0615    |
| 281 | 7903507 | FAM102B      | -0.1604    | 0.0000        | 0.6271        | 0.0000    |
| 282 | 8056323 | FIGN         | -0.1228    | 0.0000        | -0.0717       | 0.6269    |
| 283 | 7955858 | HOXC10       | 0.5101     | 0.0000        | -0.6244       | -0.0344   |
| 284 | 8135363 | PIK3CG       | -0.2664    | 0.0000        | 0.6244        | 0.0000    |
| 285 | 7908553 | PTPRC        | -0.2402    | 0.0000        | 0.6243        | 0.0000    |
| 286 | 7917433 | ODF2L        | -0.4471    | 0.0000        | 0.6241        | 0.0598    |
| 287 | 8043436 | IGKC         | -0.0531    | 0.0000        | 0.6239        | 0.0000    |
| 288 | 8134869 | PCOLCE       | -0.2054    | -0.2871       | 0.6235        | 0.0296    |
| 289 | 8161407 | FAM74A3      | -0.0765    | 0.0000        | 0.6234        | 0.0000    |
| 290 | 7907271 | FMO2         | -0.3376    | 0.0000        | 0.6230        | 0.0694    |
| 291 | 7895855 | ---          | 0.0000     | -0.6228       | 0.0000        | 0.0117    |
| 292 | 7965941 | GLT8D2       | -0.0684    | 0.0000        | 0.6222        | 0.0000    |
| 293 | 7964460 | DDIT3        | 0.2435     | 0.0662        | 0.0000        | -0.6221   |
| 294 | 8100943 | RASSF6       | 0.0000     | 0.0000        | 0.6190        | -0.0614   |
| 295 | 8067839 | KGFLP1       | -0.2301    | 0.0000        | 0.6183        | 0.0000    |
| 296 | 7906777 | FCGR2B       | -0.1007    | 0.0000        | 0.6176        | 0.0000    |
| 297 | 7945132 | FLI1         | -0.2470    | 0.0000        | 0.6172        | 0.0000    |
| 298 | 7935930 | KCNIP2       | 0.0000     | 0.0000        | -0.6164       | 0.4662    |
| 299 | 7915612 | PTCH2        | -0.1327    | 0.0000        | 0.0000        | 0.6162    |
| 300 | 8118548 | HLA-DRA      | -0.3793    | 0.0000        | 0.6162        | 0.0925    |
| 301 | 7923043 | KCNT2        | -0.1712    | 0.0000        | 0.6159        | 0.0000    |
| 302 | 8060805 | CHGB         | 0.1030     | 0.0000        | -0.6156       | 0.0000    |
| 303 | 8115543 | EBF1         | -0.1928    | -0.1312       | 0.6156        | 0.0000    |
| 304 | 7937330 | IFITM2       | -0.3313    | 0.0000        | 0.6155        | 0.0077    |
| 305 | 8120719 | CD109        | -0.2020    | -0.0250       | 0.6147        | 0.0000    |
| 306 | 8081065 | ---          | 0.0000     | 0.0000        | 0.6140        | -0.1113   |
| 307 | 8132860 | EGFR         | -0.1029    | -0.2329       | 0.0000        | 0.6137    |
| 308 | 8057486 | PDE1A        | -0.3675    | 0.0000        | 0.6126        | 0.0718    |

| #   | ID      | Name     | SDHB.score | SDHD-AT.score | SDHD-HN.score | VHL.score |
|-----|---------|----------|------------|---------------|---------------|-----------|
| 309 | 8178193 | HLA-DRA  | -0.3778    | 0.0000        | 0.6125        | 0.0910    |
| 310 | 7926506 | CACNB2   | 0.0000     | 0.0000        | -0.6119       | 0.0000    |
| 311 | 8162373 | OGN      | -0.0646    | -0.0627       | 0.6119        | 0.0000    |
| 312 | 8121277 | AIM1     | -0.1156    | -0.1759       | 0.6116        | 0.0000    |
| 313 | 7973101 | RNASE6   | -0.2993    | 0.0000        | 0.6114        | 0.0000    |
| 314 | 8107408 | KCNN2    | 0.0000     | 0.6108        | 0.0000        | 0.0000    |
| 315 | 7962212 | PKP2     | 0.0000     | 0.4352        | 0.0000        | -0.6090   |
| 316 | 8146908 | KCNB2    | 0.0000     | 0.0000        | -0.6088       | 0.2647    |
| 317 | 8014241 | SLFN12   | -0.3386    | 0.0000        | 0.6082        | 0.0117    |
| 318 | 7997712 | IRF8     | -0.1035    | -0.0640       | 0.6077        | 0.0000    |
| 319 | 7940237 | MS4A4A   | -0.3782    | 0.0000        | 0.6072        | 0.0519    |
| 320 | 8066117 | SAMHD1   | -0.3740    | 0.0000        | 0.6066        | 0.0847    |
| 321 | 7971922 | PCDH9    | -0.0975    | 0.0000        | -0.4467       | 0.6065    |
| 322 | 8128123 | RRAGD    | 0.4339     | 0.0000        | 0.0000        | -0.6061   |
| 323 | 7985493 | TM6SF1   | -0.1651    | 0.0000        | 0.6061        | 0.0000    |
| 324 | 7988672 | HDC      | -0.1493    | 0.0000        | 0.6059        | 0.0000    |
| 325 | 8097080 | SYNPO2   | -0.1922    | -0.1094       | 0.6051        | 0.0000    |
| 326 | 8077299 | CNTN6    | -0.0847    | -0.0366       | -0.0015       | 0.6051    |
| 327 | 8138805 | CPVL     | -0.3229    | 0.0000        | 0.6046        | 0.0120    |
| 328 | 8114612 | CD14     | -0.4223    | 0.0000        | 0.6040        | 0.1381    |
| 329 | 7912198 | ENO1     | -0.2408    | 0.0000        | 0.0000        | 0.6030    |
| 330 | 8172280 | SLC9A7   | 0.1078     | 0.6017        | 0.0000        | -0.4769   |
| 331 | 8137264 | TMEM176A | -0.4675    | -0.1555       | 0.1881        | 0.5998    |
| 332 | 7917052 | SLC44A5  | -0.2732    | 0.0000        | 0.5986        | 0.0000    |
| 333 | 7953428 | CD4      | -0.1714    | -0.1397       | 0.5969        | 0.0000    |
| 334 | 8144931 | ATP6V1B2 | 0.2136     | 0.0000        | -0.5961       | 0.0000    |
| 335 | 7981722 | IGHA1    | -0.0309    | -0.1827       | 0.5955        | 0.0000    |
| 336 | 7986520 | C15orf51 | -0.3510    | 0.0000        | 0.0000        | 0.5950    |
| 337 | 8085665 | RFTN1    | -0.1366    | -0.2458       | 0.5942        | 0.0000    |
| 338 | 8087691 | CACNA2D2 | 0.0000     | 0.0000        | 0.5937        | -0.2879   |
| 339 | 8108981 | STK32A   | 0.2580     | 0.0000        | 0.0000        | -0.5934   |
| 340 | 8123446 | SMOC2    | -0.3181    | -0.1926       | 0.5932        | 0.1608    |
| 341 | 7985620 | ALPK3    | -0.2872    | 0.0000        | -0.1372       | 0.5932    |
| 342 | 8034892 | OR7A5    | -0.0173    | 0.0000        | 0.5928        | 0.0000    |
| 343 | 8043438 | IGKC     | 0.0000     | -0.0069       | 0.5923        | 0.0000    |
| 344 | 7952350 | SCN3B    | 0.4331     | 0.0000        | -0.5907       | -0.1434   |
| 345 | 7917728 | FAM69A   | -0.0410    | 0.0000        | 0.5906        | 0.0000    |
| 346 | 8180078 | HLA-DMB  | -0.2315    | 0.0000        | 0.5902        | 0.0000    |
| 347 | 8179519 | HLA-DPB1 | -0.2052    | 0.0000        | 0.5899        | 0.0000    |
| 348 | 8101788 | UNC5C    | 0.0000     | 0.1149        | -0.5892       | 0.0779    |
| 349 | 8023755 | ---      | -0.0617    | 0.0000        | 0.5887        | 0.0000    |
| 350 | 7995825 | MT1F     | -0.1212    | -0.1673       | 0.0000        | 0.5878    |
| 351 | 8153363 | CYP11B1  | -0.1733    | 0.0000        | 0.0000        | 0.5875    |
| 352 | 7901342 | ELAVL4   | 0.0000     | 0.0000        | -0.5865       | 0.2290    |
| 353 | 8161892 | GNA14    | -0.3864    | 0.5862        | -0.2251       | 0.4519    |
| 354 | 8125530 | HLA-DMB  | -0.2387    | 0.0000        | 0.5856        | 0.0000    |
| 355 | 8072798 | CYTH4    | -0.2277    | -0.1595       | 0.5834        | 0.0264    |
| 356 | 8154491 | ADAMTSL1 | -0.2718    | -0.0764       | 0.5825        | 0.0496    |
| 357 | 8105340 | GZMA     | -0.0414    | 0.0000        | 0.5820        | 0.0000    |
| 358 | 7960874 | C3AR1    | -0.3802    | 0.0000        | 0.5820        | 0.1273    |
| 359 | 8053713 | ---      | 0.0000     | -0.0249       | 0.5812        | 0.0000    |
| 360 | 7998434 | TPSAB1   | -0.0685    | 0.0000        | 0.5807        | 0.0000    |
| 361 | 7965979 | ALDH1L2  | 0.0000     | 0.0000        | 0.5791        | 0.0000    |
| 362 | 7951178 | TRPC6    | -0.1377    | 0.0000        | 0.5781        | 0.0000    |
| 363 | 8059413 | DOCK10   | -0.1892    | -0.5274       | 0.5778        | 0.1463    |
| 364 | 7954631 | FAR2     | 0.1600     | 0.0000        | -0.5776       | 0.0000    |
| 365 | 8046922 | COL3A1   | -0.0491    | -0.1443       | 0.5770        | 0.0000    |
| 366 | 7942372 | FOLR2    | -0.3718    | 0.0000        | 0.5766        | 0.0387    |
| 367 | 7971150 | LHFP     | -0.3843    | -0.0658       | 0.5763        | 0.2042    |
| 368 | 8083887 | CLDN11   | -0.1262    | 0.0000        | 0.5759        | 0.0000    |
| 369 | 8107823 | ADAMTS19 | 0.1200     | 0.5757        | -0.4069       | -0.1779   |
| 370 | 7936050 | CYP17A1  | -0.2188    | 0.0000        | 0.0000        | 0.5752    |

| #   | ID      | Name     | SDHB.score | SDHD-AT.score | SDHD-HN.score | VHL.score |
|-----|---------|----------|------------|---------------|---------------|-----------|
| 371 | 8164269 | ENG      | -0.1230    | 0.0000        | 0.5751        | 0.0000    |
| 372 | 8020110 | RAB31    | -0.1709    | -0.0229       | 0.5734        | 0.0000    |
| 373 | 7971565 | LPAR6    | -0.3443    | -0.0220       | 0.5730        | 0.1308    |
| 374 | 8081288 | TMEM45A  | 0.0000     | 0.0000        | -0.3737       | 0.5726    |
| 375 | 7922756 | NMNAT2   | 0.2095     | 0.2186        | 0.0000        | -0.5724   |
| 376 | 8048350 | PLCD4    | 0.1095     | 0.0000        | -0.5722       | 0.0000    |
| 377 | 7943998 | NNMT     | -0.2447    | -0.0755       | 0.5717        | 0.0183    |
| 378 | 7944152 | IL10RA   | -0.2022    | -0.0826       | 0.5716        | 0.0000    |
| 379 | 8162388 | OMD      | -0.0782    | -0.0755       | 0.5715        | 0.0000    |
| 380 | 8178205 | HLA-DQA2 | -0.1753    | 0.0000        | 0.5714        | 0.0000    |
| 381 | 7981309 | BEGAIN   | 0.1821     | 0.0000        | -0.5707       | 0.0000    |
| 382 | 7986517 | C15orf51 | -0.3323    | 0.0000        | 0.0000        | 0.5701    |
| 383 | 7955908 | NCKAP1L  | -0.1856    | -0.1761       | 0.5696        | 0.0000    |
| 384 | 8111739 | FYB      | -0.2493    | 0.0000        | 0.5690        | 0.0000    |
| 385 | 7976080 | GPR65    | -0.2052    | 0.0000        | 0.5680        | 0.0000    |
| 386 | 7903980 | C1orf162 | -0.2720    | 0.0000        | 0.5666        | 0.0000    |
| 387 | 8115851 | STC2     | -0.2049    | -0.2697       | 0.0000        | 0.5661    |
| 388 | 7909877 | MOSC1    | 0.0000     | 0.0000        | -0.5656       | 0.0000    |
| 389 | 8024111 | CNN2     | -0.1527    | 0.0000        | 0.5654        | 0.0000    |
| 390 | 8047784 | ZDBF2    | 0.1389     | 0.0442        | -0.5650       | 0.0000    |
| 391 | 8121601 | FAM26E   | -0.2005    | 0.0000        | 0.5648        | 0.0000    |
| 392 | 8038126 | CA11     | 0.1700     | 0.3723        | 0.0000        | -0.5638   |
| 393 | 8084838 | HRASLS   | -0.1377    | 0.0000        | -0.1244       | 0.5625    |
| 394 | 8126153 | KCNK5    | -0.0321    | -0.1539       | 0.5625        | 0.0000    |
| 395 | 7926900 | MAP3K8   | -0.3227    | 0.0000        | 0.5623        | 0.0408    |
| 396 | 7930498 | ACSL5    | -0.3223    | 0.0000        | 0.5622        | 0.0927    |
| 397 | 8086600 | CCR1     | -0.0978    | 0.0000        | 0.5621        | 0.0000    |
| 398 | 7995681 | MMP2     | -0.1256    | -0.1733       | 0.5609        | 0.0000    |
| 399 | 7926545 | PLXDC2   | -0.3030    | 0.0000        | 0.5594        | 0.0647    |
| 400 | 8007100 | IGFBP4   | -0.2861    | -0.0224       | 0.5580        | 0.0595    |
| 401 | 8154692 | TEK      | -0.4278    | 0.0000        | 0.5576        | 0.1480    |
| 402 | 7921637 | CD84     | -0.2053    | -0.0481       | 0.5570        | 0.0000    |
| 403 | 8169263 | VSIG1    | -0.0937    | -0.0206       | 0.0000        | 0.5568    |
| 404 | 8089011 | PROS1    | -0.1884    | 0.0000        | 0.5562        | 0.0000    |
| 405 | 8066745 | ZNF334   | 0.0000     | 0.0000        | -0.5551       | 0.0000    |
| 406 | 7948167 | APLNR    | -0.2640    | -0.0062       | 0.5550        | 0.0234    |
| 407 | 8047161 | OBFC2A   | -0.2222    | -0.0055       | 0.5548        | 0.0000    |
| 408 | 7943740 | C11orf88 | -0.0749    | 0.0000        | -0.0493       | 0.5545    |
| 409 | 7912670 | UQCRH    | 0.0000     | 0.5545        | 0.0000        | 0.0000    |
| 410 | 7982564 | SPRED1   | -0.2743    | -0.2243       | 0.5525        | 0.1397    |
| 411 | 8054377 | FHL2     | -0.0910    | 0.0000        | 0.5524        | 0.0000    |
| 412 | 8036010 | PEPD     | 0.0853     | 0.4714        | 0.0000        | -0.5514   |
| 413 | 7980233 | PGF      | -0.0652    | -0.0824       | 0.5513        | 0.0000    |
| 414 | 7928330 | OIT3     | -0.0934    | 0.0000        | 0.5511        | 0.0000    |
| 415 | 8030007 | EMP3     | -0.0005    | 0.0000        | 0.5506        | 0.0000    |
| 416 | 8089911 | HCLS1    | -0.3239    | -0.0989       | 0.5504        | 0.1519    |
| 417 | 7981737 | IGHA1    | -0.0226    | -0.0615       | 0.5504        | 0.0000    |
| 418 | 8053187 | PCGF1    | 0.1752     | 0.1549        | 0.0000        | -0.5501   |
| 419 | 8109677 | GABRG2   | 0.0000     | 0.0000        | -0.5493       | 0.5341    |
| 420 | 7974902 | RHOJ     | -0.2288    | -0.1543       | 0.5487        | 0.0468    |
| 421 | 8106660 | RASGRF2  | -0.2924    | -0.1784       | 0.5473        | 0.1468    |
| 422 | 8043433 | ---      | 0.0000     | 0.0000        | 0.5469        | 0.0000    |
| 423 | 8043197 | VAMP8    | -0.3798    | 0.0000        | 0.5469        | 0.1284    |
| 424 | 7983564 | SLC12A1  | -0.0332    | 0.0000        | -0.0730       | 0.5452    |
| 425 | 8027778 | FXYD5    | 0.0000     | -0.1558       | 0.5450        | -0.1228   |
| 426 | 8161701 | TMEM2    | -0.3597    | -0.4932       | 0.5449        | 0.3868    |
| 427 | 8136807 | ---      | 0.0037     | 0.0832        | -0.5448       | 0.0000    |
| 428 | 8137244 | GIMAP4   | -0.4066    | 0.0000        | 0.5447        | 0.1746    |
| 429 | 7996430 | HSF4     | 0.0000     | -0.1300       | -0.1428       | 0.5446    |
| 430 | 8045688 | TNFAIP6  | -0.0091    | 0.0000        | 0.5445        | 0.0000    |
| 431 | 8155849 | ANXA1    | -0.3137    | -0.0217       | 0.5440        | 0.1061    |
| 432 | 7951485 | SLC35F2  | 0.4190     | 0.0000        | 0.0000        | -0.5432   |

| #   | ID      | Name         | SDHB.score | SDHD-AT.score | SDHD-HN.score | VHL.score |
|-----|---------|--------------|------------|---------------|---------------|-----------|
| 433 | 7965410 | DCN          | -0.2662    | 0.0000        | 0.5431        | 0.0000    |
| 434 | 8056102 | CD302        | -0.1194    | 0.0000        | 0.5426        | 0.0000    |
| 435 | 8055624 | ZEB2         | -0.4923    | 0.0000        | 0.5424        | 0.3332    |
| 436 | 8021349 | ST8SIA3      | 0.0000     | 0.0000        | -0.5421       | 0.0000    |
| 437 | 8053315 | LRRTM4       | -0.0766    | -0.5417       | 0.0488        | 0.3225    |
| 438 | 7968351 | C13orf33     | -0.0411    | 0.0000        | 0.5416        | 0.0000    |
| 439 | 7935627 | GOT1         | 0.1811     | 0.0993        | 0.0000        | -0.5414   |
| 440 | 8118594 | HLA-DPB1     | -0.1677    | 0.0000        | 0.5408        | 0.0000    |
| 441 | 8105084 | C7           | -0.5408    | 0.0000        | 0.3985        | 0.3244    |
| 442 | 8090823 | SLCO2A1      | -0.2619    | 0.0000        | 0.5407        | 0.0000    |
| 443 | 8083445 | ---          | -0.1177    | -0.0626       | 0.5406        | 0.0000    |
| 444 | 7970924 | STARD13      | -0.4215    | 0.0000        | 0.0040        | 0.5400    |
| 445 | 8088979 | VGLL3        | -0.1495    | 0.0000        | 0.5384        | 0.0000    |
| 446 | 7903893 | CD53         | -0.3567    | 0.0000        | 0.5374        | 0.0792    |
| 447 | 8180100 | HLA-DPA1     | -0.2841    | 0.0000        | 0.5373        | 0.0000    |
| 448 | 8118564 | HLA-DQA2     | -0.1603    | 0.0000        | 0.5371        | 0.0000    |
| 449 | 7961546 | EPS8         | -0.2619    | -0.0840       | 0.5365        | 0.0677    |
| 450 | 8172043 | SRPX         | -0.2286    | 0.0000        | 0.5364        | 0.0000    |
| 451 | 8029219 | TMEM145      | 0.0000     | 0.0000        | -0.5346       | 0.3127    |
| 452 | 8105348 | GPX8         | -0.1178    | 0.0000        | 0.5346        | 0.0000    |
| 453 | 7967660 | RIMBP2       | 0.1421     | 0.0225        | -0.5338       | 0.0000    |
| 454 | 7904433 | PHGDH        | 0.0000     | 0.5335        | 0.0000        | -0.4143   |
| 455 | 8017964 | ABCA6        | -0.4073    | 0.0000        | 0.5335        | 0.0505    |
| 456 | 7944560 | ARHGEF12     | 0.0000     | -0.5334       | 0.0000        | 0.0000    |
| 457 | 7923596 | ETNK2        | 0.1935     | 0.2930        | -0.5333       | -0.0715   |
| 458 | 8178884 | HLA-DMA      | -0.2597    | 0.0000        | 0.5321        | 0.0000    |
| 459 | 7906767 | FCGR2C       | -0.2945    | -0.1282       | 0.5318        | 0.1361    |
| 460 | 7932082 | CCDC3        | -0.0387    | 0.0000        | 0.5318        | 0.0000    |
| 461 | 8050031 | MYT1L        | 0.0455     | 0.0000        | -0.5311       | 0.0000    |
| 462 | 7934570 | KCNMA1       | 0.1089     | 0.0000        | -0.5309       | 0.0000    |
| 463 | 7919606 | HIST2H2BF    | -0.1317    | 0.5302        | -0.0948       | 0.0449    |
| 464 | 7945169 | TMEM45B      | 0.0000     | 0.0000        | -0.2658       | 0.5302    |
| 465 | 8023757 | CD226        | -0.1226    | 0.0000        | 0.5296        | 0.0000    |
| 466 | 8075709 | APOL4        | -0.0903    | -0.1766       | 0.5287        | 0.0000    |
| 467 | 8146863 | SULF1        | -0.0994    | 0.0000        | 0.5287        | 0.0000    |
| 468 | 8137250 | GIMAP2       | -0.2860    | 0.0000        | 0.5285        | 0.0000    |
| 469 | 8085788 | NKIRAS1      | 0.0225     | 0.2642        | 0.0000        | -0.5279   |
| 470 | 7958202 | CHST11       | -0.1550    | -0.0689       | 0.5277        | 0.0000    |
| 471 | 8116734 | LY86         | -0.2204    | 0.0000        | 0.5271        | 0.0000    |
| 472 | 8142270 | NRCAM        | 0.0747     | 0.0000        | -0.5263       | 0.0000    |
| 473 | 7904843 | PDZK1        | 0.0000     | 0.0000        | -0.1264       | 0.5255    |
| 474 | 8043995 | IL1R1        | -0.1387    | 0.0000        | 0.5251        | 0.0000    |
| 475 | 7894026 | ---          | 0.0000     | -0.5249       | 0.0000        | 0.0000    |
| 476 | 7908351 | PLA2G4A      | -0.2696    | -0.0368       | 0.0000        | 0.5245    |
| 477 | 8125537 | HLA-DMA      | -0.2583    | 0.0000        | 0.5240        | 0.0000    |
| 478 | 8160459 | ELAVL2       | 0.0365     | 0.0000        | 0.1516        | -0.5230   |
| 479 | 8171896 | CXorf21      | -0.2504    | 0.0000        | 0.5215        | 0.0000    |
| 480 | 8110289 | NSD1         | -0.2283    | -0.2244       | 0.0000        | 0.5211    |
| 481 | 7986229 | ST8SIA2      | 0.1941     | 0.0000        | 0.0000        | -0.5205   |
| 482 | 8103415 | C4orf18      | -0.4916    | 0.0000        | 0.5200        | 0.3184    |
| 483 | 7992181 | TPSAB1       | -0.0435    | 0.0000        | 0.5199        | 0.0000    |
| 484 | 8104901 | IL7R         | -0.0394    | -0.1549       | 0.5198        | 0.0000    |
| 485 | 7981601 | IGHV4-31     | -0.0250    | -0.0746       | 0.5195        | 0.0000    |
| 486 | 8162404 | ECM2         | -0.3414    | 0.0000        | 0.5187        | 0.0873    |
| 487 | 7911237 | OR2L13       | 0.0000     | 0.5187        | 0.0000        | -0.2060   |
| 488 | 7932453 | NEBL         | 0.1174     | 0.0000        | -0.5178       | 0.0000    |
| 489 | 8139033 | AOAH         | -0.2888    | 0.0000        | 0.5169        | 0.0111    |
| 490 | 7986515 | LOC100289668 | -0.3151    | 0.0000        | 0.0000        | 0.5166    |
| 491 | 8034890 | OR7C1        | -0.0597    | 0.0000        | 0.5163        | 0.0000    |
| 492 | 8014158 | ---          | -0.0163    | 0.0000        | 0.5160        | 0.0000    |
| 493 | 8065948 | FER1L4       | -0.0286    | 0.0000        | -0.1266       | 0.5155    |
| 494 | 8166906 | GPR34        | -0.4406    | 0.0000        | 0.5154        | 0.0798    |



| #   | ID      | Name       | SDHB.score | SDHD-AT.score | SDHD-HN.score | VHL.score |
|-----|---------|------------|------------|---------------|---------------|-----------|
| 495 | 8125556 | HLA-DPA1   | -0.2929    | 0.0000        | 0.5148        | 0.0000    |
| 496 | 8170166 | HTATSF1    | 0.0127     | 0.5147        | -0.4096       | 0.0000    |
| 497 | 8106448 | PDE8B      | 0.0000     | 0.5143        | -0.0842       | 0.0000    |
| 498 | 8150253 | STAR       | -0.0962    | 0.0000        | -0.0290       | 0.5138    |
| 499 | 7982012 | SNORD115-3 | 0.0000     | 0.5136        | 0.0000        | 0.0000    |
| 500 | 7938035 | TRIM22     | -0.1348    | -0.1241       | 0.5131        | 0.0000    |
| 501 | 8081138 | EPHA6      | -0.1715    | 0.0000        | 0.0000        | 0.5128    |
| 502 | 7905147 | C1orf54    | -0.1186    | 0.0000        | 0.5122        | 0.0000    |
| 503 | 8133155 | TPST1      | 0.3529     | 0.0000        | 0.0000        | -0.5119   |
| 504 | 7918034 | DPH5       | -0.0883    | 0.5116        | 0.0000        | 0.0000    |
| 505 | 8101174 | CCDC158    | -0.0044    | 0.0000        | -0.0877       | 0.5115    |
| 506 | 7896708 | ---        | -0.1462    | 0.0000        | 0.5114        | 0.0000    |
| 507 | 8167973 | HEPH       | -0.3309    | -0.0982       | 0.5113        | 0.1852    |
| 508 | 8070826 | ITGB2      | -0.1593    | 0.0000        | 0.5111        | 0.0000    |
| 509 | 8112980 | EDIL3      | -0.1767    | 0.0000        | 0.5099        | 0.0000    |
| 510 | 7919645 | SV2A       | 0.2195     | 0.2496        | 0.0000        | -0.5097   |
| 511 | 7896759 | LOC643837  | -0.2544    | 0.0000        | 0.0000        | 0.5095    |
| 512 | 8111772 | DAB2       | -0.4239    | -0.0173       | 0.5081        | 0.2787    |
| 513 | 7990054 | UACA       | -0.2723    | -0.0704       | 0.5081        | 0.0933    |
| 514 | 8030866 | FPR3       | -0.1029    | -0.1829       | 0.5080        | 0.0000    |
| 515 | 7935058 | MYOF       | -0.1643    | -0.2505       | 0.5069        | 0.0277    |
| 516 | 8053735 | ---        | 0.0000     | -0.0958       | 0.5069        | 0.0000    |
| 517 | 7928429 | PLAU       | -0.1388    | -0.0217       | 0.5068        | 0.0000    |
| 518 | 7969986 | TNFSF13B   | -0.2551    | 0.0000        | 0.5057        | 0.0335    |
| 519 | 7916643 | TM2D1      | -0.1472    | 0.5051        | 0.0000        | 0.0000    |
| 520 | 8007454 | RND2       | 0.0091     | 0.0000        | 0.0442        | -0.5048   |
| 521 | 8080847 | C3orf14    | 0.0897     | 0.1845        | 0.0000        | -0.5043   |
| 522 | 8037037 | ATP5SL     | 0.0304     | 0.2078        | 0.0000        | -0.5042   |
| 523 | 7940775 | RARRES3    | -0.1004    | 0.0000        | 0.5035        | 0.0000    |
| 524 | 7923812 | RAB7L1     | 0.1446     | 0.0000        | 0.0000        | -0.5034   |
| 525 | 8085774 | ZNF385D    | -0.0422    | -0.0278       | 0.5027        | 0.0000    |
| 526 | 8001800 | CDH11      | 0.0000     | -0.2491       | 0.5022        | 0.0000    |
| 527 | 7983761 | ---        | -0.0793    | -0.2406       | 0.5013        | 0.0000    |
| 528 | 8129562 | CTGF       | -0.1995    | 0.0000        | 0.5012        | 0.0000    |
| 529 | 8104788 | RAI14      | -0.2116    | -0.1204       | 0.5009        | 0.0367    |
| 530 | 7950142 | CLPB       | 0.5006     | 0.0000        | -0.4029       | -0.1760   |
| 531 | 7993898 | VWA3A      | 0.0000     | 0.0000        | -0.1147       | 0.5003    |
| 532 | 8091260 | SLC9A9     | -0.3200    | 0.0000        | 0.4995        | 0.0574    |
| 533 | 7939052 | FIBIN      | -0.0528    | 0.0000        | 0.4991        | 0.0000    |
| 534 | 7896705 | ---        | -0.2645    | 0.0000        | 0.4989        | 0.0000    |
| 535 | 8009653 | CD300A     | -0.3063    | 0.0000        | 0.0000        | 0.4983    |
| 536 | 8023175 | IER3IP1    | 0.2756     | 0.1974        | 0.0000        | -0.4980   |
| 537 | 7990080 | LARP6      | 0.0118     | 0.0000        | 0.0185        | -0.4977   |
| 538 | 7898623 | UBXN10     | -0.2085    | 0.0000        | 0.0000        | 0.4974    |
| 539 | 8056222 | DPP4       | -0.2004    | -0.0449       | 0.4974        | 0.0000    |
| 540 | 7926037 | PFKFB3     | -0.1946    | -0.3500       | 0.0000        | 0.4969    |
| 541 | 8111915 | SEPP1      | -0.3785    | 0.0000        | 0.4966        | 0.1529    |
| 542 | 7924499 | TLR5       | -0.2104    | 0.0000        | 0.4958        | 0.0000    |
| 543 | 7918426 | SLC16A4    | -0.3229    | 0.0000        | 0.4955        | 0.0990    |
| 544 | 8084794 | IL1RAP     | -0.3038    | -0.0754       | 0.4955        | 0.1470    |
| 545 | 7928736 | NRG3       | 0.0000     | 0.0000        | 0.4718        | -0.4948   |
| 546 | 8096875 | ENPEP      | -0.3094    | 0.0000        | 0.0000        | 0.4947    |
| 547 | 8157105 | ZNF462     | -0.0565    | -0.0836       | 0.0000        | 0.4946    |
| 548 | 8062796 | GDAP1L1    | 0.2501     | 0.2384        | 0.0000        | -0.4943   |
| 549 | 8109843 | DOCK2      | -0.2429    | -0.0634       | 0.4941        | 0.0579    |
| 550 | 8038347 | TEAD2      | -0.2777    | 0.0000        | 0.4939        | 0.0500    |
| 551 | 8006367 | RHBDL3     | 0.0000     | 0.0000        | -0.4938       | 0.0000    |
| 552 | 8145317 | ADAMDEC1   | -0.1232    | 0.0000        | 0.4936        | 0.0000    |
| 553 | 7893104 | ---        | 0.0000     | -0.4931       | 0.0000        | 0.0850    |
| 554 | 7985147 | DNAJA4     | 0.0000     | -0.2263       | 0.0000        | 0.4924    |
| 555 | 8136248 | MEST       | 0.0000     | 0.0630        | -0.4916       | 0.0000    |
| 556 | 8055992 | ACVR1C     | 0.1150     | 0.4915        | -0.3237       | -0.1834   |

| #   | ID      | Name      | SDHB.score | SDHD-AT.score | SDHD-HN.score | VHL.score |
|-----|---------|-----------|------------|---------------|---------------|-----------|
| 557 | 7893493 | ---       | 0.0000     | -0.4914       | 0.0000        | 0.0861    |
| 558 | 7990636 | C15orf5   | -0.0787    | 0.0000        | 0.4906        | 0.0000    |
| 559 | 7929525 | C10orf131 | -0.1094    | 0.0000        | 0.4903        | 0.0000    |
| 560 | 7992891 | ---       | 0.4370     | 0.0000        | -0.4899       | -0.0697   |
| 561 | 7910618 | SLC35F3   | 0.1335     | 0.3438        | 0.0000        | -0.4899   |
| 562 | 8134263 | COL1A2    | -0.0531    | -0.1025       | 0.4898        | 0.0000    |
| 563 | 8152512 | TNFRSF11B | -0.0937    | 0.0000        | 0.4894        | 0.0000    |
| 564 | 8160260 | BNC2      | -0.0167    | 0.0000        | 0.4893        | 0.0000    |
| 565 | 7917182 | ELTD1     | -0.2835    | -0.0094       | 0.4893        | 0.0923    |
| 566 | 8155388 | FAM74A3   | -0.0462    | 0.0000        | 0.4887        | 0.0000    |
| 567 | 8137240 | GIMAP7    | -0.2956    | 0.0000        | 0.4883        | 0.0000    |
| 568 | 8042391 | PLEK      | -0.2266    | 0.0000        | 0.4882        | 0.0000    |
| 569 | 7988644 | ATP8B4    | -0.1977    | 0.0000        | 0.4882        | 0.0000    |
| 570 | 7945371 | IFITM3    | -0.2986    | 0.0000        | 0.4873        | 0.1029    |
| 571 | 8173755 | ITM2A     | -0.1294    | 0.0000        | 0.4870        | 0.0000    |
| 572 | 7908529 | LHX9      | 0.0000     | 0.4870        | 0.0000        | 0.0000    |
| 573 | 7915682 | ZSWIM5    | -0.1552    | 0.0000        | 0.0000        | 0.4870    |
| 574 | 7951372 | CASP4     | -0.3125    | -0.1244       | 0.4869        | 0.1870    |
| 575 | 7961514 | MGP       | -0.3394    | 0.0000        | 0.4867        | 0.0123    |
| 576 | 7969861 | ITGBL1    | -0.1730    | 0.0000        | 0.4865        | 0.0000    |
| 577 | 8132182 | C7orf16   | 0.0000     | 0.0000        | 0.2011        | -0.4861   |
| 578 | 7924085 | RD3       | -0.0718    | 0.0000        | -0.1189       | 0.4860    |
| 579 | 8132118 | AQP1      | -0.3732    | -0.2838       | 0.2576        | 0.4856    |
| 580 | 7960947 | A2M       | -0.2839    | -0.0743       | 0.4854        | 0.1251    |
| 581 | 8147503 | LAPTM4B   | 0.1891     | 0.0000        | 0.0000        | -0.4849   |
| 582 | 7946781 | PLEKHA7   | 0.2692     | 0.0000        | 0.0000        | -0.4848   |
| 583 | 8160274 | MGC24103  | -0.0161    | -0.2524       | 0.4845        | 0.0000    |
| 584 | 7936835 | CPXM2     | -0.0127    | 0.0000        | 0.4844        | 0.0000    |
| 585 | 8054254 | AFF3      | 0.0000     | 0.0000        | 0.4841        | -0.3996   |
| 586 | 7896699 | ---       | -0.0420    | 0.0000        | 0.4841        | 0.0000    |
| 587 | 8043474 | LOC652493 | 0.0000     | -0.1100       | 0.4839        | 0.0000    |
| 588 | 8014233 | SLFN11    | -0.1739    | -0.2054       | 0.4838        | 0.0343    |
| 589 | 8155487 | KGFLP1    | -0.2213    | 0.0000        | 0.4836        | 0.0000    |
| 590 | 7920082 | RORC      | -0.1322    | 0.4835        | 0.0000        | 0.0000    |
| 591 | 8045499 | HNMT      | -0.2959    | 0.0000        | 0.4832        | 0.0277    |
| 592 | 8080082 | ---       | 0.0986     | 0.0997        | 0.0000        | -0.4831   |
| 593 | 8110074 | HMP19     | 0.2517     | 0.0915        | -0.4829       | -0.0900   |
| 594 | 8043360 | IGK@      | -0.0012    | 0.0000        | 0.4827        | 0.0000    |
| 595 | 8157582 | GSN       | -0.1964    | 0.0000        | 0.4815        | 0.0000    |
| 596 | 8006433 | CCL2      | -0.2205    | 0.0000        | 0.4815        | 0.0000    |
| 597 | 8101957 | EMCN      | -0.3763    | 0.0000        | 0.4797        | 0.1130    |
| 598 | 8095080 | PDGFRA    | -0.2304    | -0.0390       | 0.4797        | 0.0382    |
| 599 | 7979663 | RAB15     | 0.0000     | 0.0000        | -0.4796       | 0.0000    |
| 600 | 7993083 | A2BP1     | 0.2138     | 0.0000        | -0.4788       | 0.0000    |
| 601 | 8092055 | SLC7A14   | 0.3034     | 0.0794        | 0.0000        | -0.4785   |
| 602 | 8059376 | SERPINE2  | 0.2678     | 0.0000        | 0.0000        | -0.4784   |
| 603 | 8180214 | ---       | -0.2055    | 0.0000        | 0.4784        | 0.0000    |
| 604 | 8139832 | ZNF117    | -0.1889    | 0.0000        | 0.0000        | 0.4781    |
| 605 | 8046695 | ITGA4     | -0.3480    | -0.1718       | 0.4775        | 0.2638    |
| 606 | 8078405 | CMTM7     | -0.0991    | -0.1669       | 0.4773        | 0.0000    |
| 607 | 8139207 | INHBA     | -0.0018    | -0.0295       | 0.4772        | 0.0000    |
| 608 | 8137485 | DPP6      | 0.1256     | 0.0000        | -0.4772       | 0.0000    |
| 609 | 8014066 | EVI2A     | -0.1230    | 0.0000        | 0.4764        | 0.0000    |
| 610 | 8065359 | CD93      | -0.3581    | -0.1076       | 0.4764        | 0.2488    |
| 611 | 8114977 | HTR4      | -0.0283    | -0.0591       | 0.0000        | 0.4755    |
| 612 | 8141066 | PON3      | -0.1043    | 0.0000        | 0.0000        | 0.4752    |
| 613 | 8101118 | CXCL9     | -0.0121    | 0.0000        | 0.4751        | 0.0000    |
| 614 | 8081838 | CDGAP     | -0.3077    | -0.0585       | 0.4750        | 0.1571    |
| 615 | 7899480 | SNORA73A  | 0.0000     | 0.4744        | 0.0000        | -0.0971   |
| 616 | 7917850 | ARHGAP29  | -0.3588    | -0.0014       | 0.4735        | 0.2025    |
| 617 | 8009951 | ITGB4     | -0.1558    | 0.0000        | 0.4733        | 0.0000    |
| 618 | 8178802 | ---       | -0.2489    | 0.0000        | 0.4725        | 0.0000    |

| #   | ID      | Name     | SDHB.score | SDHD-AT.score | SDHD-HN.score | VHL.score |
|-----|---------|----------|------------|---------------|---------------|-----------|
| 619 | 7900857 | ST3GAL3  | -0.0421    | 0.4723        | 0.0000        | 0.0000    |
| 620 | 8093219 | BDH1     | 0.1451     | 0.4715        | 0.0000        | -0.4422   |
| 621 | 7921873 | FCGR3A   | -0.2659    | 0.0000        | 0.4712        | 0.0461    |
| 622 | 8088776 | FOXP1    | 0.0000     | 0.0000        | 0.4704        | 0.0000    |
| 623 | 8070194 | RUNX1    | -0.1061    | -0.2014       | 0.4703        | 0.0000    |
| 624 | 8126798 | GPR116   | -0.3959    | -0.0420       | 0.4700        | 0.2747    |
| 625 | 7976808 | ---      | 0.0000     | 0.0000        | -0.4700       | 0.3239    |
| 626 | 8067932 | C21orf34 | -0.4231    | 0.0000        | 0.0000        | 0.4699    |
| 627 | 7915032 | RSPO1    | -0.0261    | 0.0000        | -0.0410       | 0.4689    |
| 628 | 8136801 | TRY6     | 0.0000     | 0.0619        | -0.4687       | 0.0000    |
| 629 | 8070297 | ERG      | -0.2560    | 0.0000        | 0.4685        | 0.0384    |
| 630 | 8045539 | KYNU     | -0.2474    | -0.0748       | 0.4681        | 0.0855    |
| 631 | 8043443 | ---      | 0.0000     | 0.0000        | 0.4680        | 0.0000    |
| 632 | 8043480 | ---      | 0.0000     | -0.1370       | 0.4680        | 0.0000    |
| 633 | 7989335 | ANXA2    | -0.2861    | -0.0636       | 0.4673        | 0.1344    |
| 634 | 7932744 | ARMC4    | -0.0736    | 0.0000        | -0.2066       | 0.4672    |
| 635 | 7974835 | PRKCH    | -0.3170    | -0.1288       | 0.4672        | 0.2072    |
| 636 | 7977786 | SLC7A7   | -0.1292    | 0.0000        | 0.4672        | 0.0000    |
| 637 | 8111932 | CCL28    | -0.1455    | 0.0000        | 0.0000        | 0.4665    |
| 638 | 8099965 | ACOT7    | 0.0000     | 0.4665        | 0.0000        | -0.1411   |
| 639 | 7954312 | SLCO1C1  | -0.1636    | 0.0000        | 0.4664        | 0.0000    |
| 640 | 8111019 | DNAH5    | -0.0359    | 0.0000        | -0.1059       | 0.4662    |
| 641 | 7976073 | FLRT2    | -0.1325    | -0.2855       | 0.4661        | 0.0249    |
| 642 | 8061013 | ISM1     | 0.0000     | 0.0000        | 0.4657        | 0.0000    |
| 643 | 8108447 | CXXC5    | 0.0021     | 0.0000        | -0.4655       | 0.0000    |
| 644 | 7980152 | LTBP2    | 0.0000     | -0.1762       | 0.4654        | 0.0000    |
| 645 | 7986293 | MCTP2    | 0.0000     | 0.0000        | -0.4654       | 0.4034    |
| 646 | 8057620 | COL5A2   | -0.0726    | -0.0902       | 0.4652        | 0.0000    |
| 647 | 7960794 | CD163    | -0.3935    | 0.0000        | 0.4650        | 0.2322    |
| 648 | 8047419 | CASP8    | -0.1449    | 0.0000        | 0.4649        | 0.0000    |
| 649 | 8016646 | COL1A1   | 0.0000     | -0.1579       | 0.4647        | 0.0000    |
| 650 | 7938951 | ANO5     | 0.3230     | 0.4345        | -0.4642       | -0.3585   |
| 651 | 7896717 | ---      | -0.0638    | -0.0959       | 0.4639        | 0.0000    |
| 652 | 8097903 | TLR2     | -0.3984    | 0.0000        | 0.4638        | 0.1911    |
| 653 | 8166447 | PTCHD1   | -0.0319    | 0.4638        | 0.1717        | -0.1388   |
| 654 | 8102210 | ---      | 0.0000     | 0.0000        | 0.4636        | 0.0000    |
| 655 | 7961083 | CLEC2B   | -0.2725    | 0.0000        | 0.4635        | 0.0433    |
| 656 | 8055639 | ---      | -0.4076    | -0.1770       | 0.4632        | 0.3574    |
| 657 | 7926410 | MRC1     | -0.4632    | 0.0000        | 0.2451        | 0.4277    |
| 658 | 8170648 | BGN      | -0.1941    | 0.0000        | 0.4629        | 0.0000    |
| 659 | 8110971 | CMBL     | 0.0000     | 0.0000        | -0.4627       | 0.0000    |
| 660 | 8165646 | ---      | 0.0000     | -0.4625       | 0.0000        | 0.2575    |
| 661 | 7927732 | ARID5B   | -0.1640    | -0.0324       | 0.4621        | 0.0000    |
| 662 | 7948493 | SLC15A3  | -0.2455    | 0.0000        | 0.4620        | 0.0000    |
| 663 | 7976828 | FLJ41170 | 0.0000     | 0.0000        | -0.4620       | 0.1948    |
| 664 | 7940409 | CD5      | -0.0105    | 0.0000        | 0.4619        | 0.0000    |
| 665 | 8022674 | CDH2     | 0.0071     | 0.0000        | -0.4617       | 0.0000    |
| 666 | 7990632 | SGK269   | 0.0000     | -0.1656       | 0.4617        | 0.0000    |
| 667 | 7981490 | TMEM179  | 0.0000     | 0.0983        | -0.4615       | 0.0000    |
| 668 | 7909425 | CAMK1G   | -0.1366    | 0.4612        | 0.0000        | 0.0000    |
| 669 | 7897953 | SNORA59A | -0.3105    | 0.0000        | 0.0000        | 0.4612    |
| 670 | 7968154 | ATP8A2   | 0.2435     | 0.1301        | -0.4611       | -0.1099   |
| 671 | 8133215 | STAG3L4  | 0.2584     | 0.1539        | 0.0000        | -0.4610   |
| 672 | 7903474 | ---      | 0.0000     | 0.4610        | 0.1256        | -0.3655   |
| 673 | 8101609 | SLC10A6  | -0.2844    | 0.0000        | 0.4607        | 0.0596    |
| 674 | 8175016 | APLN     | 0.0000     | 0.0000        | -0.3584       | 0.4598    |
| 675 | 7976804 | ---      | 0.0000     | 0.0000        | -0.4594       | 0.2301    |
| 676 | 7933204 | C10orf10 | -0.2122    | 0.0000        | 0.0000        | 0.4589    |
| 677 | 7997662 | KIAA0513 | 0.1570     | 0.0667        | -0.4587       | 0.0000    |
| 678 | 8147132 | CA2      | -0.2686    | -0.2422       | 0.0352        | 0.4586    |
| 679 | 8080028 | ---      | 0.1239     | 0.0316        | 0.0000        | -0.4584   |
| 680 | 8148059 | DEPDC6   | 0.0000     | 0.0000        | -0.4580       | 0.0000    |

| #   | ID      | Name     | SDHB.score | SDHD-AT.score | SDHD-HN.score | VHL.score |
|-----|---------|----------|------------|---------------|---------------|-----------|
| 681 | 7897236 | KCNAB2   | -0.4579    | 0.0000        | 0.0798        | 0.3304    |
| 682 | 8045664 | LYPD6B   | 0.0000     | 0.0000        | 0.4576        | -0.0136   |
| 683 | 7901535 | PODN     | -0.0466    | 0.0000        | 0.4576        | 0.0000    |
| 684 | 7931930 | PRKCQ    | 0.0000     | 0.0000        | 0.4574        | -0.0657   |
| 685 | 7951686 | IL18     | -0.2114    | 0.0000        | 0.4573        | 0.0000    |
| 686 | 7952601 | ETS1     | -0.3608    | -0.1854       | 0.4572        | 0.3003    |
| 687 | 8132070 | GARS     | 0.0925     | 0.1121        | 0.0000        | -0.4571   |
| 688 | 8115464 | HAVCR2   | -0.0946    | -0.0514       | 0.4562        | 0.0000    |
| 689 | 8107520 | TNFAIP8  | 0.0000     | 0.0000        | 0.4560        | 0.0000    |
| 690 | 7901856 | ---      | -0.0212    | 0.4560        | 0.0000        | 0.0000    |
| 691 | 8116780 | DSP      | 0.4559     | 0.0000        | -0.3061       | -0.0952   |
| 692 | 8075924 | MFNG     | 0.0000     | 0.0000        | 0.4558        | 0.0000    |
| 693 | 8178090 | C6orf48  | 0.1436     | 0.0000        | 0.0000        | -0.4557   |
| 694 | 8094743 | RHOH     | -0.0566    | -0.0137       | 0.4553        | 0.0000    |
| 695 | 8046099 | NOSTRIN  | -0.4550    | 0.0000        | 0.3413        | 0.3096    |
| 696 | 7902235 | LRRRC7   | -0.3435    | 0.0000        | 0.4549        | 0.0511    |
| 697 | 7946365 | STK33    | 0.1370     | 0.1870        | 0.0000        | -0.4548   |
| 698 | 8097449 | PCDH10   | -0.0854    | 0.0000        | 0.4546        | 0.0000    |
| 699 | 8173059 | WNK3     | 0.1317     | 0.0000        | -0.4543       | 0.0000    |
| 700 | 7916045 | EPS15    | -0.4543    | 0.0000        | 0.3089        | 0.2532    |
| 701 | 7928171 | SGPL1    | 0.0000     | 0.0450        | -0.4541       | 0.0000    |
| 702 | 7940673 | GNG3     | 0.1840     | 0.3203        | 0.0000        | -0.4538   |
| 703 | 8151931 | TSPYL5   | 0.0000     | -0.3446       | -0.1162       | 0.4534    |
| 704 | 8146092 | IDO1     | 0.0000     | 0.4534        | 0.0000        | 0.0000    |
| 705 | 8157283 | PRPF4    | 0.0546     | 0.0000        | -0.4534       | 0.0000    |
| 706 | 7893827 | ---      | 0.0000     | 0.4530        | 0.0000        | -0.1636   |
| 707 | 8101728 | FAM13A   | -0.1604    | -0.3666       | 0.0000        | 0.4530    |
| 708 | 8116418 | GFPT2    | -0.0596    | 0.0000        | 0.4528        | 0.0000    |
| 709 | 8151952 | NIPAL2   | -0.1626    | -0.1117       | 0.0000        | 0.4517    |
| 710 | 8089835 | FSTL1    | -0.1605    | -0.1947       | 0.4516        | 0.0306    |
| 711 | 7896689 | ---      | -0.2719    | 0.0000        | 0.4515        | 0.0164    |
| 712 | 7944179 | CD3E     | 0.0000     | 0.0000        | 0.4513        | 0.0000    |
| 713 | 7918467 | C1orf103 | 0.0000     | 0.4512        | 0.0000        | -0.2490   |
| 714 | 8115734 | LCP2     | -0.2614    | -0.1376       | 0.4511        | 0.1443    |
| 715 | 8020806 | RNF125   | -0.0721    | 0.0000        | 0.4508        | 0.0000    |
| 716 | 7900658 | TIE1     | -0.2126    | 0.0000        | 0.4505        | 0.0000    |
| 717 | 7955869 | HOXC8    | 0.0632     | 0.0000        | -0.4502       | 0.0000    |
| 718 | 7952145 | HYOU1    | 0.4497     | 0.0000        | -0.3039       | -0.1651   |
| 719 | 7917431 | ---      | 0.0000     | 0.0000        | 0.4497        | 0.0000    |
| 720 | 7946579 | LYVE1    | -0.3909    | 0.0000        | 0.0581        | 0.4492    |
| 721 | 8026139 | NFIX     | -0.1608    | 0.0000        | 0.4486        | 0.0000    |
| 722 | 7912347 | CASZ1    | 0.0000     | -0.1643       | -0.0369       | 0.4485    |
| 723 | 8067157 | CBLN4    | -0.0706    | 0.0000        | 0.0000        | 0.4477    |
| 724 | 8045674 | LYPD6    | 0.0000     | 0.0000        | 0.4476        | -0.1474   |
| 725 | 8014257 | SLFN12L  | -0.0918    | -0.0736       | 0.4474        | 0.0000    |
| 726 | 8142345 | DOCK4    | -0.0170    | -0.4474       | 0.2116        | 0.0963    |
| 727 | 7978285 | ADCY4    | -0.1656    | 0.0000        | 0.4473        | 0.0000    |
| 728 | 8138741 | HOXA6    | 0.0722     | 0.0000        | -0.4472       | 0.0000    |
| 729 | 8115391 | HAND1    | 0.0283     | 0.0994        | -0.4472       | 0.0000    |
| 730 | 7986350 | ARRDC4   | -0.2688    | 0.0000        | 0.0000        | 0.4470    |
| 731 | 7952290 | TRIM29   | 0.0000     | 0.0000        | -0.1162       | 0.4467    |
| 732 | 7950764 | DLG2     | 0.0062     | 0.0000        | -0.4465       | 0.0000    |
| 733 | 8029423 | ZNF233   | 0.2349     | -0.1225       | -0.4464       | 0.0000    |
| 734 | 7895972 | ---      | 0.0891     | 0.0000        | 0.0000        | -0.4463   |
| 735 | 8168790 | TMEM35   | 0.1271     | 0.4172        | 0.0000        | -0.4462   |
| 736 | 7958819 | ERP29    | 0.0000     | 0.4457        | 0.0000        | -0.2733   |
| 737 | 8091327 | PLSCR1   | -0.0796    | -0.0414       | 0.4457        | 0.0000    |
| 738 | 8097282 | SPRY1    | -0.3205    | -0.0397       | 0.0211        | 0.4455    |
| 739 | 8001329 | CBLN1    | 0.0000     | 0.0000        | 0.3188        | -0.4453   |
| 740 | 7988467 | FBN1     | -0.1185    | -0.1888       | 0.4438        | 0.0000    |
| 741 | 7928107 | H2AFY2   | 0.2207     | 0.0632        | 0.0000        | -0.4438   |
| 742 | 8096032 | PRDM8    | 0.0000     | -0.0379       | -0.0091       | 0.4437    |

| #   | ID      | Name          | SDHB.score | SDHD-AT.score | SDHD-HN.score | VHL.score |
|-----|---------|---------------|------------|---------------|---------------|-----------|
| 743 | 8067279 | CTSZ          | -0.3997    | 0.0000        | 0.0000        | 0.4431    |
| 744 | 8048940 | SP100         | -0.2915    | -0.0281       | 0.4427        | 0.1405    |
| 745 | 8112045 | ESM1          | 0.0000     | 0.0000        | -0.4426       | 0.2878    |
| 746 | 8020037 | KIAA0802      | 0.2652     | 0.0000        | -0.4425       | -0.0404   |
| 747 | 7982062 | HBII-52-28    | 0.0000     | 0.4425        | 0.0000        | 0.0000    |
| 748 | 7987145 | FMN1          | -0.1130    | 0.0000        | 0.0000        | 0.4424    |
| 749 | 7980891 | TC2N          | -0.0857    | 0.0000        | 0.4415        | 0.0000    |
| 750 | 8104570 | FAM105A       | 0.0000     | 0.0000        | -0.4415       | 0.2541    |
| 751 | 8113039 | MEF2C         | -0.2986    | -0.0769       | 0.4413        | 0.1739    |
| 752 | 7957665 | ELK3          | -0.2839    | 0.0000        | 0.4410        | 0.1004    |
| 753 | 7955078 | PFKM          | 0.0671     | 0.0000        | 0.0000        | -0.4404   |
| 754 | 7902074 | LEPR          | -0.2123    | 0.0000        | 0.4401        | 0.0000    |
| 755 | 8180003 | ---           | -0.2520    | 0.0000        | 0.4399        | 0.0000    |
| 756 | 7927915 | STOX1         | 0.3223     | 0.1170        | -0.0923       | -0.4399   |
| 757 | 8139632 | FIGNL1        | 0.1592     | 0.0000        | -0.4399       | 0.0000    |
| 758 | 8090817 | C3orf36       | 0.0000     | 0.0000        | 0.4397        | 0.0000    |
| 759 | 8054281 | LONRF2        | 0.0000     | 0.0000        | -0.4397       | 0.0000    |
| 760 | 8036284 | COX7A1        | -0.1582    | 0.4394        | 0.0000        | 0.0000    |
| 761 | 8044080 | SLC9A2        | 0.0000     | 0.4382        | 0.0000        | 0.0000    |
| 762 | 8037467 | ZNF229        | 0.0938     | 0.0000        | -0.4382       | 0.0000    |
| 763 | 8085233 | RPUSD3        | 0.1568     | 0.0000        | 0.0000        | -0.4379   |
| 764 | 7936242 | ITPRIP        | -0.2433    | -0.0290       | 0.0000        | 0.4373    |
| 765 | 8124448 | HIST1H4H      | -0.0212    | 0.0000        | -0.0126       | 0.4373    |
| 766 | 7982026 | SNORD115-10   | 0.0000     | 0.4368        | 0.0000        | 0.0000    |
| 767 | 7983228 | MAP1A         | 0.1204     | 0.0000        | 0.0000        | -0.4367   |
| 768 | 8057821 | DNAH7         | -0.1582    | 0.0000        | 0.0000        | 0.4363    |
| 769 | 8007348 | RAMP2         | -0.1759    | 0.0000        | 0.4363        | 0.0000    |
| 770 | 8105487 | RAB3C         | 0.1233     | 0.1248        | -0.4358       | 0.0000    |
| 771 | 8041940 | STON1-GTF2A1L | -0.3452    | 0.0000        | 0.4357        | 0.1300    |
| 772 | 7925320 | NID1          | -0.2208    | -0.3678       | 0.0593        | 0.4354    |
| 773 | 8114415 | GFRA3         | -0.1622    | -0.0225       | 0.0000        | 0.4354    |
| 774 | 7894843 | ---           | -0.1889    | 0.0000        | 0.0000        | 0.4353    |
| 775 | 8121749 | GJA1          | -0.2266    | -0.0716       | 0.0000        | 0.4353    |
| 776 | 8142452 | TFEC          | -0.2258    | -0.0373       | 0.4350        | 0.0586    |
| 777 | 7924977 | PGBD5         | 0.0873     | 0.0000        | -0.4348       | 0.0000    |
| 778 | 8134051 | C7orf63       | -0.2964    | 0.0000        | 0.4347        | 0.0000    |
| 779 | 8104723 | ---           | -0.1532    | -0.0855       | 0.4345        | 0.0000    |
| 780 | 7917516 | GBP1          | -0.2264    | 0.0000        | 0.4345        | 0.0035    |
| 781 | 8018652 | RNF157        | 0.2512     | 0.1880        | 0.0000        | -0.4344   |
| 782 | 7982072 | SNORD115-33   | 0.0000     | 0.4340        | 0.0000        | 0.0000    |
| 783 | 8141625 | EPHB4         | -0.2590    | -0.0283       | 0.4338        | 0.1012    |
| 784 | 8135705 | KCND2         | 0.2719     | 0.0000        | 0.0000        | -0.4333   |
| 785 | 7908924 | PRELP         | 0.0000     | -0.0167       | 0.4333        | 0.0000    |
| 786 | 8178811 | ---           | -0.2521    | 0.0000        | 0.4331        | 0.0000    |
| 787 | 8055606 | GTDC1         | -0.3434    | 0.0000        | 0.0000        | 0.4330    |
| 788 | 8099817 | FLJ13197      | 0.0000     | 0.0000        | -0.4328       | 0.2660    |
| 789 | 7990333 | CYP11A1       | -0.0795    | 0.0000        | 0.0000        | 0.4326    |
| 790 | 8162394 | ASPN          | -0.1023    | 0.0000        | 0.4322        | 0.0000    |
| 791 | 7957023 | LYZ           | -0.0970    | 0.0000        | 0.4321        | 0.0000    |
| 792 | 7926622 | SPAG6         | 0.1476     | 0.0117        | 0.0000        | -0.4320   |
| 793 | 8101952 | DDIT4L        | -0.1094    | 0.0000        | -0.1979       | 0.4319    |
| 794 | 8168749 | SRPX2         | -0.1161    | -0.0520       | 0.4317        | 0.0000    |
| 795 | 7900510 | CTPS          | 0.0000     | 0.4316        | -0.4084       | 0.0000    |
| 796 | 8106393 | F2R           | -0.1480    | -0.2215       | 0.4314        | 0.0382    |
| 797 | 8099326 | SLC2A9        | -0.2702    | 0.0000        | 0.4314        | 0.0197    |
| 798 | 8069676 | ADAMTS1       | -0.3362    | 0.0000        | 0.0000        | 0.4313    |
| 799 | 8152491 | EXT1          | 0.0000     | -0.0333       | 0.4309        | 0.0000    |
| 800 | 8009075 | TANC2         | 0.0000     | 0.0000        | -0.1033       | 0.4306    |
| 801 | 7896719 | ---           | -0.1714    | -0.0453       | 0.4305        | 0.0000    |
| 802 | 8083429 | MBNL1         | -0.0696    | -0.0131       | 0.4300        | 0.0000    |
| 803 | 8102415 | CAMK2D        | 0.0473     | 0.0000        | 0.0228        | -0.4296   |
| 804 | 8038655 | KLK4          | 0.0000     | 0.0000        | 0.4295        | 0.0000    |

| #   | ID      | Name      | SDHB.score | SDHD-AT.score | SDHD-HN.score | VHL.score |
|-----|---------|-----------|------------|---------------|---------------|-----------|
| 805 | 7992293 | TMEM204   | -0.0974    | 0.0000        | 0.4295        | 0.0000    |
| 806 | 8073578 | C22orf32  | 0.0000     | 0.4290        | 0.0000        | -0.1775   |
| 807 | 7951207 | TMEM123   | -0.1316    | -0.4289       | 0.0050        | 0.3736    |
| 808 | 8084360 | ABCF3     | 0.1538     | 0.3883        | -0.4289       | -0.1248   |
| 809 | 8066848 | PREX1     | -0.3203    | 0.0000        | 0.4288        | 0.1002    |
| 810 | 7996569 | ---       | 0.0000     | -0.2814       | 0.0000        | 0.4288    |
| 811 | 8048205 | IGFBP2    | -0.0299    | -0.4093       | 0.0000        | 0.4282    |
| 812 | 8128991 | LAMA4     | -0.0351    | -0.3329       | 0.4280        | 0.0000    |
| 813 | 8056968 | LOC375295 | -0.0587    | 0.0000        | 0.0000        | 0.4278    |
| 814 | 7953626 | CLSTN3    | 0.0000     | 0.3983        | -0.4275       | 0.0000    |
| 815 | 8149629 | GFRA2     | 0.2397     | 0.0000        | 0.0000        | -0.4271   |
| 816 | 7987405 | RASGRP1   | -0.0415    | 0.0000        | 0.4270        | 0.0000    |
| 817 | 7927215 | ALOX5     | -0.1459    | 0.0000        | 0.4270        | 0.0000    |
| 818 | 7926786 | APBB1IP   | -0.1899    | 0.0000        | 0.4263        | 0.0000    |
| 819 | 7907286 | FMO1      | 0.0000     | 0.0000        | 0.4258        | 0.0000    |
| 820 | 8048749 | KCNE4     | -0.3534    | -0.1422       | 0.2047        | 0.4254    |
| 821 | 8135544 | FOXP2     | 0.0000     | 0.0000        | 0.4253        | 0.0000    |
| 822 | 8024194 | GPX4      | 0.1179     | 0.1814        | 0.0000        | -0.4251   |
| 823 | 7971104 | TRPC4     | -0.1412    | -0.1725       | 0.4249        | 0.0100    |
| 824 | 7915846 | MKNK1     | -0.4249    | 0.0000        | 0.2355        | 0.3163    |
| 825 | 8044793 | STEAP3    | 0.1459     | 0.0000        | 0.0000        | -0.4244   |
| 826 | 8059565 | PID1      | 0.0000     | 0.0000        | -0.4243       | 0.2078    |
| 827 | 8109629 | FABP6     | 0.0000     | -0.1562       | -0.0677       | 0.4242    |
| 828 | 8124166 | MBOAT1    | -0.1615    | -0.1243       | 0.4242        | 0.0164    |
| 829 | 8141882 | DPY19L2P2 | 0.0000     | 0.0000        | -0.4239       | 0.1984    |
| 830 | 8100541 | IGFBP7    | -0.2393    | 0.0000        | 0.4239        | 0.0136    |
| 831 | 7894440 | ---       | 0.0000     | -0.4238       | 0.0000        | 0.0628    |
| 832 | 8164692 | RAPGEF1   | -0.2267    | -0.2663       | 0.0155        | 0.4237    |
| 833 | 8093332 | ZNF876P   | -0.0297    | 0.0000        | -0.1034       | 0.4236    |
| 834 | 8044008 | IL1RL2    | -0.1057    | 0.0000        | 0.0000        | 0.4233    |
| 835 | 7964872 | PTPRB     | -0.3978    | 0.0000        | 0.0247        | 0.4231    |
| 836 | 8097655 | ---       | 0.3038     | 0.0000        | 0.0000        | -0.4231   |
| 837 | 7933043 | ---       | -0.0084    | -0.1245       | 0.0000        | 0.4224    |
| 838 | 8132347 | GPR141    | -0.0840    | 0.0000        | 0.4223        | 0.0000    |
| 839 | 8156321 | SYK       | -0.2449    | 0.0000        | 0.4222        | 0.0000    |
| 840 | 7966122 | TMEM119   | 0.0000     | 0.0000        | 0.4217        | 0.0000    |
| 841 | 7972231 | SLITRK1   | 0.0000     | 0.0220        | 0.4215        | -0.1792   |
| 842 | 7894529 | ---       | 0.0000     | 0.4215        | 0.0000        | 0.0000    |
| 843 | 7973336 | MMP14     | -0.0993    | -0.2291       | 0.4214        | 0.0000    |
| 844 | 7917954 | FRRS1     | -0.2457    | 0.0000        | 0.4214        | 0.0259    |
| 845 | 8168531 | GPR174    | 0.0000     | 0.0000        | 0.4213        | 0.0000    |
| 846 | 8098041 | TMEM144   | -0.1951    | -0.0398       | 0.0000        | 0.4209    |
| 847 | 8089015 | PROS1     | -0.1445    | 0.0000        | 0.4207        | 0.0000    |
| 848 | 8160786 | KIAA1161  | 0.0000     | 0.0000        | 0.4206        | -0.1153   |
| 849 | 7911252 | OR2L2     | 0.0118     | 0.4200        | -0.0232       | -0.1924   |
| 850 | 8091422 | WWTR1     | -0.2011    | -0.0850       | 0.4198        | 0.0558    |
| 851 | 8002347 | AARS      | 0.2460     | 0.0000        | 0.0000        | -0.4194   |
| 852 | 7951040 | GPR83     | -0.2244    | 0.0000        | 0.4194        | 0.0000    |
| 853 | 7899436 | SESN2     | 0.0000     | 0.4190        | 0.0000        | -0.2986   |
| 854 | 8113491 | STARD4    | 0.0250     | 0.0000        | -0.4189       | 0.0000    |
| 855 | 8127180 | HMGCLL1   | 0.1742     | 0.0000        | -0.4185       | 0.0000    |
| 856 | 8145490 | PTK2B     | 0.0000     | 0.0000        | 0.4181        | 0.0000    |
| 857 | 8020702 | TAF4B     | -0.1237    | 0.0000        | 0.0000        | 0.4180    |
| 858 | 8095262 | REST      | -0.1672    | -0.2956       | 0.4179        | 0.1072    |
| 859 | 7926223 | CAMK1D    | -0.4176    | 0.0000        | 0.0000        | 0.2387    |
| 860 | 8156278 | S1PR3     | -0.1825    | 0.0000        | 0.0000        | 0.4175    |
| 861 | 7985285 | ARNT2     | 0.3454     | 0.0000        | -0.4175       | -0.1612   |
| 862 | 7996341 | PDP2      | 0.1669     | 0.0000        | 0.0000        | -0.4174   |
| 863 | 7927649 | CISD1     | 0.0000     | 0.2131        | 0.0000        | -0.4169   |
| 864 | 8129082 | COL10A1   | 0.0000     | 0.0000        | 0.4160        | -0.0588   |
| 865 | 8148070 | COL14A1   | 0.0000     | 0.0000        | 0.4154        | 0.0000    |
| 866 | 8041422 | RASGRP3   | -0.2851    | -0.1266       | 0.4153        | 0.1941    |

| #   | ID      | Name        | SDHB.score | SDHD-AT.score | SDHD-HN.score | VHL.score |
|-----|---------|-------------|------------|---------------|---------------|-----------|
| 867 | 8166065 | TLR8        | -0.1272    | 0.0000        | 0.4152        | 0.0000    |
| 868 | 7938608 | SPON1       | -0.0953    | -0.2800       | 0.4146        | 0.0025    |
| 869 | 8091799 | C3orf57     | 0.0000     | 0.0000        | 0.4145        | -0.0574   |
| 870 | 8077970 | FBLN2       | 0.0000     | 0.0000        | 0.4135        | 0.0000    |
| 871 | 7942503 | PPME1       | 0.1591     | 0.0000        | -0.4135       | 0.0000    |
| 872 | 8104022 | PDLIM3      | -0.0870    | 0.0000        | 0.4134        | 0.0000    |
| 873 | 8127778 | FAM46A      | 0.0000     | 0.0000        | -0.4132       | 0.0000    |
| 874 | 8030448 | CPT1C       | 0.0000     | 0.4129        | 0.0000        | 0.0000    |
| 875 | 8139500 | TNS3        | -0.3667    | -0.0873       | 0.4127        | 0.2905    |
| 876 | 7922976 | PTGS2       | -0.4125    | 0.0000        | 0.2250        | 0.3476    |
| 877 | 8172698 | SHROOM4     | -0.2846    | -0.0457       | 0.4125        | 0.1578    |
| 878 | 7943051 | NAALAD2     | 0.0000     | 0.1304        | -0.4123       | 0.0000    |
| 879 | 7927120 | RET         | 0.0000     | 0.0000        | -0.4123       | 0.1682    |
| 880 | 7953651 | PEX5        | 0.1178     | 0.0441        | -0.4122       | 0.0000    |
| 881 | 8090591 | PLXND1      | -0.2053    | -0.0912       | 0.4121        | 0.0692    |
| 882 | 8115099 | PDGFRB      | -0.2299    | -0.1897       | 0.4119        | 0.1488    |
| 883 | 7934789 | GRID1       | 0.1192     | 0.0000        | -0.4118       | 0.0000    |
| 884 | 8110166 | HIGD2A      | 0.1277     | 0.2530        | 0.0000        | -0.4116   |
| 885 | 7937039 | EBF3        | 0.0000     | 0.0000        | 0.4115        | 0.0000    |
| 886 | 7941104 | ARL2        | 0.2466     | 0.0000        | 0.0000        | -0.4111   |
| 887 | 7955502 | SCN8A       | 0.1745     | 0.0000        | -0.4110       | 0.0000    |
| 888 | 8104912 | SKP2        | 0.0000     | 0.0000        | -0.4110       | 0.0000    |
| 889 | 8112649 | FAM169A     | 0.2231     | 0.0000        | 0.0000        | -0.4109   |
| 890 | 7930299 | C10orf78    | -0.0911    | 0.0000        | 0.0000        | 0.4108    |
| 891 | 7908879 | PPFIA4      | 0.0000     | -0.0931       | -0.1041       | 0.4103    |
| 892 | 8043100 | TMSB10      | -0.2101    | 0.0000        | 0.4098        | 0.0000    |
| 893 | 7906838 | NOS1AP      | 0.2329     | 0.0000        | -0.4097       | 0.0000    |
| 894 | 7938396 | AMPD3       | 0.0000     | 0.0000        | -0.4096       | 0.0000    |
| 895 | 8088634 | ---         | -0.3167    | -0.1395       | 0.1461        | 0.4095    |
| 896 | 7894073 | ---         | 0.0143     | -0.4094       | 0.0000        | 0.0000    |
| 897 | 7997336 | VAT1L       | 0.0000     | 0.0000        | -0.4093       | 0.0132    |
| 898 | 7965873 | IGF1        | -0.0901    | -0.0118       | 0.4093        | 0.0000    |
| 899 | 8101757 | GPRIN3      | -0.2469    | -0.2879       | 0.4092        | 0.2193    |
| 900 | 8151508 | ---         | 0.0663     | 0.0000        | -0.4090       | 0.0000    |
| 901 | 7984813 | ISLR        | 0.0000     | -0.0253       | 0.4088        | 0.0000    |
| 902 | 8048926 | SP140L      | -0.1759    | -0.0814       | 0.4087        | 0.0261    |
| 903 | 8147796 | RIMS2       | 0.1841     | 0.0000        | -0.4086       | 0.0000    |
| 904 | 7894136 | ---         | 0.0000     | 0.4085        | 0.0000        | -0.3832   |
| 905 | 8081235 | COL8A1      | -0.1128    | 0.0000        | 0.4083        | 0.0000    |
| 906 | 7982056 | SNORD115-25 | 0.0000     | 0.4080        | 0.0000        | 0.0000    |
| 907 | 8128284 | EPHA7       | 0.0000     | 0.0000        | 0.4076        | 0.0000    |
| 908 | 7907572 | PAPPA2      | 0.0000     | 0.0000        | 0.4075        | 0.0000    |
| 909 | 8043909 | NPAS2       | 0.0000     | 0.0000        | -0.1785       | 0.4075    |
| 910 | 7922229 | SELE        | -0.2642    | 0.0000        | 0.4074        | 0.0000    |
| 911 | 8113790 | MARCH2      | -0.0648    | 0.0000        | 0.0000        | 0.4072    |
| 912 | 8169115 | NRK         | 0.0000     | -0.0873       | 0.0000        | 0.4071    |
| 913 | 7978312 | RIPK3       | -0.0151    | 0.0000        | 0.4066        | 0.0000    |
| 914 | 8172254 | CXorf36     | -0.1410    | 0.0000        | 0.4065        | 0.0000    |
| 915 | 7913357 | ECE1        | -0.2318    | 0.0000        | 0.0000        | 0.4064    |
| 916 | 8019669 | GCGR        | 0.2740     | 0.0000        | 0.0000        | -0.4063   |
| 917 | 8149749 | TNFRSF10D   | -0.2466    | -0.0470       | 0.0000        | 0.4062    |
| 918 | 7896718 | ---         | -0.2478    | 0.0000        | 0.4060        | 0.0707    |
| 919 | 8084092 | NDUFB5      | 0.0000     | 0.2612        | 0.0000        | -0.4055   |
| 920 | 7893918 | ---         | 0.0000     | 0.4051        | 0.0000        | -0.0921   |
| 921 | 7950933 | NOX4        | -0.0294    | 0.0000        | 0.4049        | 0.0000    |
| 922 | 7933228 | MARCH3      | -0.0001    | 0.0000        | -0.1354       | 0.4049    |
| 923 | 8155121 | NPR2        | 0.4047     | -0.3075       | -0.1437       | 0.0000    |
| 924 | 7991602 | PCSK6       | -0.1300    | 0.0000        | 0.0000        | 0.4045    |
| 925 | 8132013 | CHN2        | -0.0468    | -0.0721       | 0.4045        | 0.0000    |
| 926 | 8138202 | ICA1        | 0.0000     | 0.0000        | -0.4042       | 0.0000    |
| 927 | 8014916 | ORMDL3      | 0.0000     | 0.4041        | 0.0000        | -0.1800   |
| 928 | 7926105 | GATA3       | 0.2378     | 0.0906        | -0.4040       | -0.1189   |

| #   | ID      | Name     | SDHB.score | SDHD-AT.score | SDHD-HN.score | VHL.score |
|-----|---------|----------|------------|---------------|---------------|-----------|
| 929 | 8178115 | CFB      | -0.0615    | 0.0000        | 0.4036        | 0.0000    |
| 930 | 8149448 | MSR1     | -0.2481    | -0.1618       | 0.4035        | 0.1663    |
| 931 | 7913869 | STMN1    | -0.4030    | 0.0000        | 0.0000        | 0.3029    |
| 932 | 7920506 | SHE      | -0.1422    | 0.0000        | 0.4029        | 0.0000    |
| 933 | 8040365 | TRIB2    | -0.2494    | -0.0977       | 0.0000        | 0.4026    |
| 934 | 8092251 | GNB4     | -0.1000    | -0.3232       | 0.4025        | 0.0363    |
| 935 | 7996239 | ---      | 0.0000     | 0.0000        | -0.4025       | 0.0000    |
| 936 | 7906400 | IFI16    | -0.0648    | -0.2470       | 0.4025        | 0.0000    |
| 937 | 7947599 | CHST1    | 0.0118     | 0.0000        | -0.4020       | 0.0000    |
| 938 | 8111387 | ADAMTS12 | 0.0000     | -0.4017       | 0.0273        | 0.0723    |
| 939 | 8157524 | TLR4     | -0.3273    | 0.0000        | 0.0669        | 0.4015    |
| 940 | 7930264 | NEURL    | 0.0000     | 0.0000        | -0.4015       | 0.0000    |
| 941 | 7910591 | C1orf57  | 0.3412     | 0.0000        | -0.1055       | -0.4015   |
| 942 | 8059748 | ECEL1    | -0.0792    | 0.0000        | 0.0000        | 0.4010    |
| 943 | 8125775 | C6orf125 | 0.0419     | 0.2871        | 0.0000        | -0.4009   |
| 944 | 8036710 | GMFG     | -0.3870    | 0.0000        | 0.4005        | 0.2018    |
| 945 | 7900555 | CCDC30   | -0.4004    | 0.0000        | 0.0000        | 0.3519    |
| 946 | 8039607 | PEG3     | 0.0000     | 0.0000        | -0.4000       | 0.0844    |
| 947 | 8099593 | KCNIP4   | -0.0631    | 0.0000        | 0.0000        | 0.4000    |
| 948 | 8118556 | HLA-DQA1 | -0.0576    | 0.0000        | 0.3999        | 0.0000    |
| 949 | 8045795 | KCNJ3    | 0.0000     | 0.0785        | 0.3998        | -0.3578   |
| 950 | 8150698 | SNAI2    | -0.0587    | -0.0365       | 0.3998        | 0.0000    |
| 951 | 8079950 | GNAI2    | -0.0025    | 0.0000        | 0.3994        | 0.0000    |
| 952 | 7893331 | ---      | 0.0000     | -0.3994       | 0.0000        | 0.0000    |
| 953 | 8003814 | ASPA     | -0.3994    | 0.0000        | 0.2119        | 0.3415    |
| 954 | 8075728 | MYH9     | -0.1872    | -0.2876       | 0.3990        | 0.1428    |
| 955 | 8061094 | PCSK2    | 0.0974     | 0.3058        | -0.3987       | -0.0271   |
| 956 | 7973850 | AKAP6    | 0.0580     | 0.0000        | -0.3985       | 0.0000    |
| 957 | 7981720 | ---      | 0.0000     | -0.1045       | 0.3983        | 0.0000    |
| 958 | 7921625 | SLAMF6   | -0.0124    | 0.0000        | 0.3982        | 0.0000    |
| 959 | 7964665 | DPY19L2  | -0.0329    | 0.0000        | -0.0933       | 0.3981    |
| 960 | 8102440 | ARSJ     | 0.0000     | 0.0000        | 0.3981        | 0.0000    |
| 961 | 8138749 | HOXA9    | 0.3981     | -0.1226       | -0.1165       | 0.0000    |
| 962 | 7896700 | ---      | -0.2291    | 0.0000        | 0.3980        | 0.0523    |
| 963 | 7893573 | ---      | 0.0316     | 0.0384        | 0.0000        | -0.3975   |
| 964 | 8096274 | DMP1     | 0.0000     | 0.0000        | 0.3973        | 0.0000    |
| 965 | 7894227 | ---      | 0.0000     | -0.3968       | 0.0000        | 0.0000    |
| 966 | 8023267 | MYO5B    | 0.0000     | 0.0000        | 0.3964        | -0.2214   |
| 967 | 7938269 | TUB      | 0.0319     | 0.0000        | -0.3964       | 0.0000    |
| 968 | 7906307 | KIRREL   | -0.2613    | -0.1084       | 0.3963        | 0.1643    |
| 969 | 7904414 | HSD3B1   | -0.0709    | 0.0000        | 0.0000        | 0.3957    |
| 970 | 7934733 | ANXA11   | -0.1659    | -0.1244       | 0.3954        | 0.4002    |
| 971 | 7943917 | ---      | 0.2122     | -0.0293       | -0.3952       | 0.0000    |
| 972 | 7893036 | ---      | 0.0000     | 0.3952        | 0.0000        | 0.0000    |
| 973 | 7946142 | PRKCDBP  | -0.1829    | 0.0000        | 0.3952        | 0.0000    |
| 974 | 8001830 | CMTM4    | 0.2589     | 0.0000        | 0.0000        | -0.3945   |
| 975 | 7986329 | NR2F2    | -0.1921    | -0.0755       | 0.3944        | 0.0545    |
| 976 | 7965156 | LIN7A    | 0.0000     | 0.0000        | 0.0000        | -0.3944   |
| 977 | 8043945 | MAP4K4   | 0.0000     | -0.3944       | 0.0000        | 0.0000    |
| 978 | 8127549 | SLC17A5  | 0.0155     | 0.0570        | 0.0000        | -0.3942   |
| 979 | 8098604 | ANKRD37  | -0.0218    | 0.0000        | 0.0000        | 0.3941    |
| 980 | 7933501 | DRGX     | 0.0000     | 0.2162        | -0.3939       | 0.0000    |
| 981 | 8065920 | FER1L4   | -0.0361    | 0.0000        | -0.0068       | 0.3937    |
| 982 | 7896701 | ---      | -0.2046    | 0.0000        | 0.3936        | 0.0064    |
| 983 | 8046646 | OSBPL6   | 0.2325     | 0.0000        | 0.0000        | -0.3936   |
| 984 | 7976832 | ---      | 0.0000     | 0.0000        | -0.3934       | 0.0925    |
| 985 | 8098060 | RXFP1    | -0.1612    | 0.0000        | -0.0043       | 0.3931    |
| 986 | 7920114 | THEM4    | 0.0000     | 0.0000        | -0.3925       | 0.0000    |
| 987 | 8078529 | STAC     | 0.0615     | 0.0000        | -0.3923       | 0.0000    |
| 988 | 8068697 | MX2      | 0.0000     | 0.0000        | 0.3921        | 0.0000    |
| 989 | 8092073 | EIF5A2   | 0.0000     | 0.0000        | 0.1383        | -0.3921   |
| 990 | 8062190 | SPAG4    | 0.0000     | 0.0000        | -0.2008       | 0.3914    |



| #    | ID      | Name     | SDHB.score | SDHD-AT.score | SDHD-HN.score | VHL.score |
|------|---------|----------|------------|---------------|---------------|-----------|
| 991  | 8138224 | NDUFA4   | 0.0000     | 0.3913        | 0.1241        | -0.3620   |
| 992  | 8027566 | CEBPG    | 0.0574     | 0.0000        | 0.0000        | -0.3912   |
| 993  | 8156060 | TLE4     | 0.0000     | 0.0000        | -0.3912       | 0.1168    |
| 994  | 8056113 | LY75     | -0.2831    | -0.1208       | 0.0862        | 0.3911    |
| 995  | 7898627 | VWA5B1   | -0.0209    | 0.0000        | 0.0000        | 0.3906    |
| 996  | 7995797 | MT1E     | -0.1441    | 0.0000        | 0.0000        | 0.3900    |
| 997  | 7896188 | ---      | 0.0000     | 0.3898        | 0.0000        | 0.0000    |
| 998  | 7906900 | DDR2     | -0.2667    | -0.1720       | 0.3898        | 0.2052    |
| 999  | 8082035 | CD86     | -0.2312    | 0.0000        | 0.3891        | 0.0715    |
| 1000 | 8107673 | GRAMD3   | -0.3888    | 0.0000        | 0.2007        | 0.3351    |
| 1001 | 8122336 | C6orf115 | 0.0000     | -0.0496       | 0.3887        | -0.0027   |
| 1002 | 7911267 | OR2M3    | 0.0000     | 0.3886        | -0.0727       | 0.0000    |
| 1003 | 8105302 | FST      | -0.0772    | 0.0000        | 0.3879        | 0.0000    |
| 1004 | 7903425 | AMY1A    | -0.3875    | 0.0050        | 0.0404        | 0.0848    |
| 1005 | 7958207 | ---      | -0.2112    | -0.1439       | 0.3873        | 0.1170    |
| 1006 | 8127193 | BMP5     | 0.0000     | 0.0000        | 0.3872        | 0.0000    |
| 1007 | 8091411 | TM4SF1   | -0.3870    | 0.0000        | 0.2253        | 0.3011    |
| 1008 | 8075569 | SLC5A4   | -0.2087    | 0.0000        | 0.3870        | 0.0334    |
| 1009 | 8131881 | C7orf46  | 0.0000     | 0.3868        | -0.2841       | 0.0000    |
| 1010 | 7903407 | AMY2B    | -0.3864    | 0.0000        | 0.0560        | 0.0973    |
| 1011 | 7896049 | ---      | 0.0000     | -0.3860       | 0.0000        | 0.0000    |
| 1012 | 8134351 | PPP1R9A  | 0.0380     | 0.0000        | -0.3857       | 0.0000    |
| 1013 | 8166015 | MSL3     | -0.1932    | 0.0000        | 0.3855        | 0.0000    |
| 1014 | 8017106 | TRIM37   | 0.1315     | 0.0000        | 0.0000        | -0.3854   |
| 1015 | 8058869 | TNS1     | -0.1302    | -0.0296       | 0.0000        | 0.3853    |
| 1016 | 8083471 | SCEF     | -0.2832    | 0.0000        | 0.0000        | 0.3853    |
| 1017 | 8027431 | ZNF536   | 0.3394     | 0.0000        | -0.3852       | -0.1365   |
| 1018 | 7910680 | GPR137B  | -0.1046    | 0.0000        | 0.3851        | 0.0000    |
| 1019 | 8027429 | ---      | 0.0000     | 0.0000        | 0.0032        | -0.3849   |
| 1020 | 8147661 | SPAG1    | 0.1266     | 0.0474        | 0.0000        | -0.3849   |
| 1021 | 8161945 | RASEF    | 0.0000     | 0.0000        | -0.3848       | 0.1651    |
| 1022 | 7916493 | PPAP2B   | -0.2776    | 0.0000        | 0.0000        | 0.3847    |
| 1023 | 7893681 | ---      | 0.0000     | 0.3846        | 0.0000        | 0.0000    |
| 1024 | 8113641 | CDO1     | 0.0000     | 0.0000        | 0.2965        | -0.3843   |
| 1025 | 7938485 | MICAL2   | -0.1082    | -0.0396       | 0.3843        | 0.0000    |
| 1026 | 8105681 | ERBB2IP  | -0.1259    | -0.2967       | 0.3837        | 0.0716    |
| 1027 | 7920600 | SHC1     | 0.0000     | 0.0000        | -0.3833       | 0.0000    |
| 1028 | 7927681 | BICC1    | -0.0366    | 0.0000        | 0.3831        | 0.0000    |
| 1029 | 7972750 | COL4A1   | -0.1084    | -0.3830       | 0.2439        | 0.1731    |
| 1030 | 7945245 | NTM      | -0.0303    | 0.0000        | 0.3828        | 0.0000    |
| 1031 | 8118345 | CFB      | -0.0622    | 0.0000        | 0.3823        | 0.0000    |
| 1032 | 8046373 | DLX1     | 0.0007     | 0.0000        | 0.1197        | -0.3819   |
| 1033 | 7948364 | MPEG1    | -0.3049    | 0.0000        | 0.3817        | 0.0831    |
| 1034 | 8012830 | TMEM220  | -0.0432    | -0.2113       | 0.0000        | 0.3814    |
| 1035 | 8122265 | TNFAIP3  | -0.3658    | 0.0000        | 0.0426        | 0.3813    |
| 1036 | 8008802 | GDPD1    | 0.0195     | 0.2338        | 0.0000        | -0.3810   |
| 1037 | 8067040 | NFATC2   | -0.1540    | -0.1633       | 0.3809        | 0.0507    |
| 1038 | 8158240 | TMSB4X   | -0.3808    | 0.0000        | 0.3770        | 0.0992    |
| 1039 | 8028514 | EIF3K    | 0.1035     | 0.3628        | 0.0000        | -0.3806   |
| 1040 | 8173955 | SYTL4    | 0.0000     | 0.0000        | -0.3805       | 0.0230    |
| 1041 | 8024273 | NDUFS7   | 0.0419     | 0.3613        | 0.0000        | -0.3805   |
| 1042 | 7979824 | ACTN1    | 0.0000     | -0.3195       | 0.3804        | -0.0550   |
| 1043 | 7916592 | MYSM1    | -0.3801    | 0.0000        | 0.0000        | 0.2702    |
| 1044 | 7898988 | CLIC4    | -0.2351    | 0.0000        | 0.3800        | 0.0000    |
| 1045 | 8041027 | MRPL33   | 0.0000     | 0.3795        | 0.0000        | -0.1002   |
| 1046 | 7975268 | ARG2     | 0.3794     | 0.0000        | -0.2894       | -0.3179   |
| 1047 | 7932420 | PTPLA    | 0.0853     | 0.0875        | 0.0000        | -0.3793   |
| 1048 | 8136557 | TBXAS1   | -0.2242    | 0.0000        | 0.3793        | 0.0000    |
| 1049 | 7903753 | GSTM2    | 0.0000     | 0.3791        | -0.1414       | 0.0000    |
| 1050 | 7996908 | SNTB2    | 0.0000     | -0.0963       | 0.3791        | 0.0000    |
| 1051 | 7948814 | HNRNPUL2 | 0.1647     | -0.3791       | 0.0000        | 0.0000    |
| 1052 | 8001981 | FHOD1    | -0.1789    | -0.1789       | 0.3788        | 0.0936    |

| #    | ID      | Name     | SDHB.score | SDHD-AT.score | SDHD-HN.score | VHL.score |
|------|---------|----------|------------|---------------|---------------|-----------|
| 1053 | 8065353 | THBD     | -0.3217    | 0.0000        | 0.3783        | 0.1631    |
| 1054 | 8146533 | FAM110B  | 0.0000     | -0.0639       | 0.3781        | 0.0000    |
| 1055 | 8077450 | ARL8B    | 0.0000     | 0.0000        | 0.0000        | -0.3780   |
| 1056 | 8126135 | GLO1     | 0.0000     | 0.1429        | 0.0000        | -0.3779   |
| 1057 | 8035793 | ZNF737   | 0.0000     | 0.3777        | 0.0000        | -0.0253   |
| 1058 | 8067233 | PMEPA1   | -0.2457    | 0.0000        | 0.3771        | 0.0000    |
| 1059 | 7895829 | ---      | 0.0000     | -0.3770       | 0.0000        | 0.0000    |
| 1060 | 7895191 | ---      | 0.0975     | 0.0000        | 0.0000        | -0.3766   |
| 1061 | 7908204 | HMCN1    | -0.2822    | 0.0000        | 0.3764        | 0.0807    |
| 1062 | 8034263 | ELAVL3   | 0.0177     | 0.1980        | 0.0000        | -0.3761   |
| 1063 | 8153002 | NDRG1    | -0.1196    | 0.0000        | 0.0000        | 0.3760    |
| 1064 | 7897890 | VPS13D   | -0.3756    | 0.0000        | 0.0934        | 0.2446    |
| 1065 | 8051785 | KCNG3    | 0.0592     | 0.0000        | 0.0000        | -0.3754   |
| 1066 | 7916789 | WDR78    | -0.3754    | 0.0000        | 0.0000        | 0.3526    |
| 1067 | 8123678 | C6orf145 | -0.1794    | -0.0160       | 0.3752        | 0.0213    |
| 1068 | 7992893 | ---      | 0.1518     | 0.0000        | -0.3751       | 0.0000    |
| 1069 | 8079305 | CLEC3B   | -0.1985    | 0.0000        | 0.3751        | 0.0000    |
| 1070 | 7929541 | CC2D2B   | -0.1783    | 0.0000        | 0.3750        | 0.0081    |
| 1071 | 8148270 | NDUFB9   | 0.0489     | 0.2320        | 0.0000        | -0.3750   |
| 1072 | 7946354 | LMO1     | 0.0627     | 0.0407        | -0.3749       | 0.0000    |
| 1073 | 8170027 | DDX26B   | -0.2629    | 0.0000        | 0.0000        | 0.3748    |
| 1074 | 8165217 | NOTCH1   | -0.1695    | -0.1150       | 0.3745        | 0.0537    |
| 1075 | 7915787 | PIK3R3   | -0.3744    | 0.0000        | 0.0744        | 0.2640    |
| 1076 | 8141094 | PDK4     | -0.1907    | 0.0000        | 0.0000        | 0.3744    |
| 1077 | 7979902 | ---      | 0.0673     | 0.0000        | -0.3743       | 0.0000    |
| 1078 | 7906878 | DDR2     | -0.2387    | -0.1047       | 0.3741        | 0.1450    |
| 1079 | 8155376 | FAM74A3  | -0.0295    | 0.0000        | 0.3741        | 0.0000    |
| 1080 | 7897527 | UBE4B    | -0.3740    | 0.0046        | 0.0000        | 0.2299    |
| 1081 | 8082086 | PARP15   | -0.0762    | 0.0000        | 0.3738        | 0.0000    |
| 1082 | 7962151 | DENND5B  | 0.0825     | 0.0000        | -0.3738       | 0.0000    |
| 1083 | 8163637 | TNC      | -0.1576    | -0.1634       | 0.3737        | 0.0601    |
| 1084 | 8056860 | WIPF1    | -0.1669    | 0.0000        | 0.3735        | 0.0000    |
| 1085 | 7893849 | ---      | 0.0000     | -0.3734       | 0.0000        | 0.0086    |
| 1086 | 7974363 | PTGDR    | 0.0000     | 0.0000        | 0.3730        | 0.0000    |
| 1087 | 7900395 | RLF      | -0.3149    | 0.0000        | 0.0000        | 0.3729    |
| 1088 | 8008185 | ABI3     | -0.1401    | 0.0000        | 0.3724        | 0.0000    |
| 1089 | 7956443 | MARS     | 0.1970     | 0.0000        | 0.0000        | -0.3722   |
| 1090 | 7967456 | RILPL2   | -0.1574    | 0.0000        | 0.3719        | 0.0000    |
| 1091 | 8081375 | FAM55C   | 0.0189     | 0.1463        | 0.0000        | -0.3719   |
| 1092 | 8174543 | DCX      | 0.0000     | 0.0000        | -0.3716       | 0.0726    |
| 1093 | 7926368 | VIM      | -0.2062    | 0.0000        | 0.3714        | 0.0000    |
| 1094 | 8102869 | ---      | 0.0000     | -0.0997       | 0.0000        | 0.3710    |
| 1095 | 7896561 | ---      | 0.0000     | 0.3709        | 0.0000        | -0.1922   |
| 1096 | 8075785 | FOXRED2  | 0.2556     | 0.0000        | 0.0000        | -0.3708   |
| 1097 | 7930927 | INPP5F   | 0.1831     | 0.0000        | -0.3707       | 0.0000    |
| 1098 | 8123936 | NEDD9    | -0.3058    | 0.0000        | 0.0000        | 0.3707    |
| 1099 | 8098344 | ---      | 0.1541     | 0.0000        | 0.0000        | -0.3705   |
| 1100 | 8047443 | STRADB   | 0.1138     | 0.0000        | -0.3703       | 0.0000    |
| 1101 | 7951422 | KIAA1826 | 0.3701     | 0.0000        | -0.0853       | -0.2287   |
| 1102 | 7913242 | MUL1     | 0.0000     | 0.3701        | 0.0000        | -0.0452   |
| 1103 | 7912343 | CASZ1    | 0.0000     | -0.2195       | 0.0000        | 0.3701    |
| 1104 | 7895611 | ---      | 0.0000     | -0.3700       | 0.0000        | 0.0000    |
| 1105 | 7978712 | CLEC14A  | -0.0952    | 0.0000        | 0.3700        | 0.0000    |
| 1106 | 8174141 | BEX5     | 0.0000     | 0.2193        | -0.3695       | 0.0000    |
| 1107 | 7981726 | ---      | 0.0000     | -0.0287       | 0.3694        | 0.0000    |
| 1108 | 8083978 | NAALADL2 | -0.2757    | 0.0000        | 0.0000        | 0.3694    |
| 1109 | 8041644 | PLEKHH2  | -0.0309    | 0.0000        | 0.3692        | 0.0000    |
| 1110 | 7952436 | ESAM     | -0.1046    | 0.0000        | 0.3692        | 0.0000    |
| 1111 | 8129497 | EPB41L2  | -0.2611    | 0.0000        | 0.3690        | 0.1167    |
| 1112 | 8108478 | C5orf32  | 0.0000     | 0.3690        | 0.0000        | -0.2742   |
| 1113 | 8008263 | PDK2     | 0.0000     | 0.3689        | 0.0000        | -0.0394   |
| 1114 | 7949588 | CD248    | -0.0906    | -0.3666       | 0.3689        | 0.0641    |

| #    | ID      | Name     | SDHB.score | SDHD-AT.score | SDHD-HN.score | VHL.score |
|------|---------|----------|------------|---------------|---------------|-----------|
| 1115 | 8061668 | HCK      | -0.2239    | 0.0000        | 0.3687        | 0.0000    |
| 1116 | 8132557 | AEBP1    | -0.1136    | 0.0000        | 0.3687        | 0.0000    |
| 1117 | 8102862 | MAML3    | 0.0000     | 0.0000        | -0.1085       | 0.3686    |
| 1118 | 7896715 | ---      | -0.0260    | -0.0104       | 0.3685        | 0.0000    |
| 1119 | 8170538 | GABRQ    | 0.0000     | 0.2308        | -0.3685       | 0.0000    |
| 1120 | 7901336 | STRADB   | 0.1037     | 0.0000        | -0.3683       | 0.0000    |
| 1121 | 8015635 | PTRF     | -0.1350    | 0.0000        | 0.3679        | 0.0000    |
| 1122 | 7903214 | LPPR4    | -0.0417    | 0.0000        | 0.3679        | 0.0000    |
| 1123 | 7963092 | FMNL3    | -0.1292    | -0.1893       | 0.3678        | 0.0364    |
| 1124 | 7926679 | KIAA1217 | -0.2993    | -0.0076       | 0.0760        | 0.3676    |
| 1125 | 8139758 | CHCHD2   | 0.0000     | 0.3673        | 0.0000        | -0.0955   |
| 1126 | 8112202 | PLK2     | -0.2815    | 0.0000        | 0.0000        | 0.3668    |
| 1127 | 8042413 | PROKR1   | 0.0553     | 0.1859        | 0.0000        | -0.3665   |
| 1128 | 7931168 | ACADSB   | 0.0000     | 0.0000        | -0.3655       | 0.0000    |
| 1129 | 7920271 | S100A4   | -0.0739    | 0.0000        | 0.3654        | 0.0000    |
| 1130 | 8161467 | FAM74A3  | -0.0180    | 0.0000        | 0.3650        | 0.0000    |
| 1131 | 8088247 | ARHGFB3  | 0.0000     | 0.0622        | 0.1912        | -0.3648   |
| 1132 | 7918558 | KCND3    | 0.0000     | -0.3645       | 0.0000        | 0.3424    |
| 1133 | 7986822 | GABRB3   | 0.2007     | 0.1903        | 0.0000        | -0.3645   |
| 1134 | 7895789 | ---      | 0.1871     | 0.0000        | 0.0000        | -0.3642   |
| 1135 | 7938100 | SMPD1    | 0.1434     | 0.1452        | 0.0000        | -0.3638   |
| 1136 | 8072926 | H1FO     | 0.1425     | 0.0000        | 0.0000        | -0.3638   |
| 1137 | 7894479 | ---      | 0.0000     | 0.3637        | 0.0000        | -0.1960   |
| 1138 | 8021461 | GRP      | -0.0171    | 0.0000        | 0.3636        | 0.0000    |
| 1139 | 8035297 | PLVAP    | -0.1272    | 0.0000        | 0.3631        | 0.0000    |
| 1140 | 8024808 | SHD      | 0.3630     | 0.0000        | -0.1193       | -0.1802   |
| 1141 | 8058063 | RFTN2    | -0.3627    | 0.0000        | 0.3264        | 0.1842    |
| 1142 | 8006621 | CCL4L1   | -0.1940    | 0.0000        | 0.3627        | 0.0000    |
| 1143 | 8078286 | RARB     | -0.3626    | 0.0000        | 0.1165        | 0.1933    |
| 1144 | 7956524 | PIP4K2C  | 0.1323     | 0.1554        | 0.0000        | -0.3624   |
| 1145 | 8170097 | SLC9A6   | 0.0000     | 0.3622        | 0.0000        | -0.2062   |
| 1146 | 7901212 | UQCRH    | -0.0098    | 0.3621        | 0.0000        | 0.0000    |
| 1147 | 7952830 | NCAPD3   | 0.0954     | 0.0000        | -0.3618       | 0.0000    |
| 1148 | 8021120 | RNF165   | 0.0000     | 0.0000        | -0.3618       | 0.1049    |
| 1149 | 8056890 | CHN1     | 0.0000     | -0.2392       | 0.3617        | 0.0000    |
| 1150 | 7985695 | AKAP13   | -0.0431    | -0.3613       | 0.0423        | 0.1969    |
| 1151 | 7944493 | CBL      | 0.0068     | -0.3611       | 0.0000        | 0.0000    |
| 1152 | 7954653 | TSPAN11  | -0.1585    | 0.0000        | 0.3610        | 0.0000    |
| 1153 | 8132660 | RAMP3    | -0.2008    | 0.0000        | 0.3609        | 0.0000    |
| 1154 | 8092392 | KLHL6    | -0.0694    | -0.0638       | 0.3608        | 0.0000    |
| 1155 | 7910001 | DEGS1    | 0.1796     | 0.0000        | 0.0000        | -0.3607   |
| 1156 | 7895638 | ---      | 0.1799     | -0.3603       | 0.0000        | 0.0000    |
| 1157 | 8120043 | RUNX2    | 0.0000     | 0.0000        | 0.3603        | 0.0000    |
| 1158 | 7995976 | CPNE2    | -0.0787    | 0.0000        | 0.3603        | 0.0000    |
| 1159 | 8154836 | ANXA2P2  | -0.2970    | 0.0000        | 0.3603        | 0.1335    |
| 1160 | 8018864 | SOCS3    | -0.2831    | 0.0000        | 0.3602        | 0.0270    |
| 1161 | 8044584 | PSD4     | -0.0671    | 0.0000        | 0.0000        | 0.3601    |
| 1162 | 8129482 | SAMD3    | -0.1644    | 0.0000        | 0.3601        | 0.0000    |
| 1163 | 8122860 | MYCT1    | -0.3184    | 0.0000        | 0.3600        | 0.1562    |
| 1164 | 7940066 | TMX2     | 0.3599     | 0.0000        | -0.0346       | -0.2311   |
| 1165 | 8127346 | RAB23    | 0.0000     | 0.0000        | 0.2769        | -0.3596   |
| 1166 | 8089112 | FILIP1L  | -0.1153    | 0.0000        | 0.3596        | 0.0000    |
| 1167 | 7990269 | C15orf59 | 0.3595     | 0.0000        | 0.0000        | -0.1464   |
| 1168 | 8128565 | POPDC3   | 0.3595     | 0.0000        | -0.1206       | -0.2966   |
| 1169 | 7975136 | FUT8     | 0.0625     | 0.1696        | 0.0000        | -0.3594   |
| 1170 | 7895405 | ---      | -0.0209    | 0.3590        | 0.0000        | 0.0000    |
| 1171 | 8099524 | LDB2     | -0.3586    | 0.0000        | 0.2953        | 0.2216    |
| 1172 | 7932326 | CUBN     | -0.3170    | 0.0000        | 0.0000        | 0.3582    |
| 1173 | 8097288 | FAT4     | -0.0863    | 0.0000        | 0.3580        | 0.0000    |
| 1174 | 7963187 | LIMA1    | -0.0023    | 0.0000        | 0.3578        | 0.0000    |
| 1175 | 7943398 | YAP1     | -0.1152    | -0.1082       | 0.3578        | 0.0000    |
| 1176 | 8100393 | KDR      | -0.3576    | 0.0000        | 0.3286        | 0.2317    |

| #    | ID      | Name          | SDHB.score | SDHD-AT.score | SDHD-HN.score | VHL.score |
|------|---------|---------------|------------|---------------|---------------|-----------|
| 1177 | 7976826 | SNORD114-26   | 0.0000     | 0.0000        | -0.3576       | 0.2421    |
| 1178 | 7918657 | PTPN22        | -0.1790    | 0.0000        | 0.3574        | 0.0040    |
| 1179 | 8114354 | NME5          | 0.0000     | 0.3567        | 0.0000        | 0.0000    |
| 1180 | 7971461 | LCP1          | -0.1511    | 0.0000        | 0.3566        | 0.0000    |
| 1181 | 7894734 | ---           | 0.0000     | -0.0711       | 0.0000        | 0.3564    |
| 1182 | 8151056 | CYP7B1        | -0.3564    | 0.0000        | 0.3103        | 0.2887    |
| 1183 | 8119915 | LOC100132354  | 0.0000     | 0.0000        | 0.3563        | 0.0000    |
| 1184 | 8032839 | SEMA6B        | 0.0000     | 0.0000        | 0.3563        | 0.0000    |
| 1185 | 8006779 | ARHGAP23      | -0.1026    | 0.0000        | 0.3562        | 0.0000    |
| 1186 | 7963142 | FAIM2         | 0.1728     | 0.3157        | -0.3562       | -0.1622   |
| 1187 | 7893892 | ---           | 0.0000     | -0.3561       | 0.0000        | 0.0000    |
| 1188 | 8166072 | TMSB4X        | -0.3338    | 0.0000        | 0.3561        | 0.1078    |
| 1189 | 8095616 | NPFPR2        | 0.0000     | 0.0000        | 0.3559        | 0.0000    |
| 1190 | 7907297 | FMO4          | -0.1932    | 0.0000        | 0.3558        | 0.0000    |
| 1191 | 7977761 | SALL2         | 0.2466     | 0.0000        | 0.0000        | -0.3557   |
| 1192 | 8106689 | CKMT2         | -0.0590    | 0.0000        | 0.0000        | 0.3556    |
| 1193 | 8016808 | CA10          | 0.2591     | 0.1096        | -0.0818       | -0.3555   |
| 1194 | 7966068 | ---           | 0.0000     | -0.3552       | 0.0986        | 0.0000    |
| 1195 | 8015037 | ---           | 0.0000     | 0.3550        | 0.0000        | -0.3044   |
| 1196 | 8067007 | TMSB4X        | -0.3502    | 0.0000        | 0.3547        | 0.0882    |
| 1197 | 8006608 | CCL4L1        | -0.1917    | 0.0000        | 0.3547        | 0.0000    |
| 1198 | 8101774 | TMSL3         | -0.3226    | 0.0000        | 0.3545        | 0.0974    |
| 1199 | 7961120 | CLEC7A        | -0.1949    | 0.0000        | 0.3544        | 0.0000    |
| 1200 | 7903786 | CSF1          | -0.1993    | -0.2111       | 0.3544        | 0.1517    |
| 1201 | 8014264 | PEX12         | 0.0889     | 0.3542        | 0.0000        | -0.3066   |
| 1202 | 7894699 | ---           | 0.1968     | 0.0000        | 0.0000        | -0.3536   |
| 1203 | 8147837 | ZFPM2         | -0.2010    | 0.0000        | 0.0000        | 0.3532    |
| 1204 | 8113796 | FLJ44606      | 0.0000     | 0.0000        | -0.2792       | 0.3532    |
| 1205 | 8147273 | SLC26A7       | 0.0000     | 0.0000        | 0.3530        | 0.0000    |
| 1206 | 8120222 | EFHC1         | -0.1134    | 0.0000        | 0.0000        | 0.3523    |
| 1207 | 8135594 | CAV1          | -0.0050    | 0.0000        | 0.3520        | 0.0000    |
| 1208 | 8169931 | RP13-102H20.1 | 0.0000     | 0.0000        | -0.1451       | 0.3519    |
| 1209 | 7913237 | CAMK2N1       | -0.2052    | 0.0000        | 0.0000        | 0.3518    |
| 1210 | 7934178 | PCBD1         | 0.0000     | 0.1606        | -0.3518       | 0.0000    |
| 1211 | 8136347 | CALD1         | -0.1298    | -0.0447       | 0.3517        | 0.0000    |
| 1212 | 7961440 | PLBD1         | -0.1891    | 0.0000        | 0.3516        | 0.0000    |
| 1213 | 8048717 | SGPP2         | 0.1609     | 0.0000        | 0.0000        | -0.3515   |
| 1214 | 7893225 | ---           | -0.2378    | 0.0000        | 0.0000        | 0.3513    |
| 1215 | 8171297 | MID1          | -0.3513    | 0.0000        | 0.2511        | 0.2850    |
| 1216 | 7990757 | CTSH          | 0.0000     | 0.0000        | 0.3512        | 0.0000    |
| 1217 | 8056327 | GRB14         | -0.0850    | 0.0000        | 0.0000        | 0.3507    |
| 1218 | 7975989 | C14orf156     | 0.0523     | 0.1797        | 0.0000        | -0.3504   |
| 1219 | 7976830 | ---           | 0.0000     | 0.0000        | -0.3502       | 0.1003    |
| 1220 | 8088436 | C3orf67       | 0.0000     | 0.0000        | -0.2324       | 0.3502    |
| 1221 | 8091537 | IGSF10        | 0.0000     | -0.1853       | 0.0000        | 0.3499    |
| 1222 | 8161265 | IGFBPL1       | 0.0596     | 0.0000        | -0.3498       | 0.0000    |
| 1223 | 8105300 | ---           | -0.1209    | -0.0560       | 0.0000        | 0.3495    |
| 1224 | 7968035 | SPATA13       | -0.1772    | 0.0000        | 0.3494        | 0.0000    |
| 1225 | 8131803 | IL6           | -0.3352    | 0.0000        | 0.3494        | 0.2077    |
| 1226 | 8060736 | ---           | 0.0000     | -0.3492       | 0.0806        | 0.0000    |
| 1227 | 7895370 | ---           | 0.0000     | -0.3490       | 0.0000        | 0.0331    |
| 1228 | 8061247 | RIN2          | -0.1977    | 0.0000        | 0.3487        | 0.0000    |
| 1229 | 8063437 | TSHZ2         | -0.2100    | 0.0000        | 0.0000        | 0.3486    |
| 1230 | 8059854 | ARL4C         | 0.1124     | 0.0000        | 0.0000        | -0.3486   |
| 1231 | 7925089 | PCNXL2        | 0.1124     | 0.2394        | 0.0000        | -0.3485   |
| 1232 | 8164937 | FAM163B       | -0.0225    | 0.0000        | -0.2339       | 0.3484    |
| 1233 | 7906185 | APOA1BP       | 0.1835     | 0.1735        | 0.0000        | -0.3482   |
| 1234 | 7913169 | CAPZB         | -0.3481    | 0.0000        | 0.2346        | 0.0250    |
| 1235 | 7950671 | GAB2          | 0.3479     | 0.0000        | -0.0258       | -0.2626   |
| 1236 | 8001102 | ---           | 0.0000     | 0.0000        | 0.3477        | 0.0000    |
| 1237 | 8072088 | SEZ6L         | 0.0000     | 0.3477        | 0.0000        | -0.2684   |
| 1238 | 8047127 | MYO1B         | -0.1003    | -0.3474       | 0.0882        | 0.2414    |

| #    | ID      | Name       | SDHB.score | SDHD-AT.score | SDHD-HN.score | VHL.score |
|------|---------|------------|------------|---------------|---------------|-----------|
| 1239 | 8138988 | DPY19L2P1  | 0.0000     | 0.0000        | -0.3474       | 0.0000    |
| 1240 | 7986195 | SV2B       | 0.0304     | 0.0000        | 0.0833        | -0.3473   |
| 1241 | 7900159 | DNALI1     | 0.0000     | 0.0000        | -0.1518       | 0.3473    |
| 1242 | 7895713 | ---        | 0.0000     | -0.3472       | 0.0045        | 0.0018    |
| 1243 | 8079392 | CCR2       | -0.0095    | 0.0000        | 0.3471        | 0.0000    |
| 1244 | 8100298 | OCIAD2     | 0.0631     | 0.2474        | 0.0000        | -0.3471   |
| 1245 | 7957861 | ANO4       | 0.2542     | 0.0000        | -0.3468       | -0.1281   |
| 1246 | 7957298 | NAV3       | 0.0000     | 0.0000        | 0.0000        | 0.3465    |
| 1247 | 7975632 | PTGR2      | 0.1445     | 0.0000        | -0.3465       | 0.0000    |
| 1248 | 8039674 | ZNF154     | -0.1370    | -0.2289       | 0.0000        | 0.3464    |
| 1249 | 8159900 | GLIS3      | 0.0000     | -0.1912       | 0.3464        | 0.0000    |
| 1250 | 7915238 | NT5C1A     | 0.0000     | 0.2970        | -0.3462       | 0.0000    |
| 1251 | 7914938 | ---        | -0.3460    | 0.1292        | 0.0000        | 0.2349    |
| 1252 | 7982022 | SNORD115-8 | 0.0000     | 0.3459        | 0.0000        | 0.0000    |
| 1253 | 8156199 | DAPK1      | -0.0847    | 0.0000        | 0.0000        | 0.3458    |
| 1254 | 8068238 | IFNAR2     | -0.1583    | 0.0000        | 0.3457        | 0.0000    |
| 1255 | 8172447 | PCSK1N     | 0.0000     | 0.0975        | -0.3455       | 0.0000    |
| 1256 | 8180362 | ---        | 0.0000     | -0.3455       | 0.0541        | 0.0000    |
| 1257 | 8089568 | CD200R1    | -0.0120    | 0.0000        | 0.3453        | 0.0000    |
| 1258 | 8056784 | DLX2       | 0.0925     | 0.0000        | 0.0000        | -0.3453   |
| 1259 | 8033767 | ZNF560     | 0.3451     | 0.0000        | 0.0000        | -0.2482   |
| 1260 | 7896285 | ---        | -0.0541    | 0.0000        | -0.0751       | 0.3447    |
| 1261 | 7920971 | C1orf85    | 0.0725     | 0.0468        | 0.0000        | -0.3447   |
| 1262 | 7965686 | ANKS1B     | 0.1769     | 0.0000        | -0.3446       | 0.0000    |
| 1263 | 8096004 | BMP2K      | -0.1065    | -0.0896       | 0.3446        | 0.0000    |
| 1264 | 7965335 | DUSP6      | -0.2232    | 0.0000        | 0.3443        | 0.0757    |
| 1265 | 7921821 | ADAMTS4    | -0.1628    | -0.1390       | 0.0000        | 0.3442    |
| 1266 | 8109507 | ITK        | 0.0000     | -0.0267       | 0.3441        | 0.0000    |
| 1267 | 7923824 | SLC41A1    | 0.0000     | 0.0000        | -0.3441       | 0.0129    |
| 1268 | 7940079 | CTNND1     | 0.0000     | -0.3439       | 0.0000        | 0.0000    |
| 1269 | 8167763 | TSPYL2     | 0.0014     | 0.0000        | -0.3438       | 0.0000    |
| 1270 | 7951140 | UNQ6228    | 0.0000     | -0.3434       | 0.1823        | 0.0000    |
| 1271 | 7915091 | MTF1       | -0.3434    | 0.0000        | 0.0000        | 0.2094    |
| 1272 | 7893001 | ---        | 0.0000     | 0.3433        | 0.0000        | -0.1635   |
| 1273 | 7972175 | ---        | -0.0412    | 0.3432        | 0.0000        | 0.0000    |
| 1274 | 7899057 | FAM54B     | -0.1763    | 0.3432        | 0.0000        | 0.0000    |
| 1275 | 7932254 | ITGA8      | -0.2130    | 0.0000        | 0.3432        | 0.0000    |
| 1276 | 7903369 | SLC30A7    | -0.3431    | 0.0000        | 0.0420        | 0.2803    |
| 1277 | 8121319 | SOBP       | 0.0000     | 0.0000        | -0.3429       | 0.1453    |
| 1278 | 8068593 | ETS2       | -0.3421    | 0.0000        | 0.0222        | 0.2724    |
| 1279 | 8149485 | MTMR7      | 0.1563     | 0.3418        | -0.0959       | -0.3116   |
| 1280 | 8147244 | NECAB1     | 0.0000     | 0.0000        | -0.1610       | 0.3418    |
| 1281 | 7951703 | DRD2       | 0.0000     | 0.0000        | -0.3417       | 0.0153    |
| 1282 | 8099537 | ---        | -0.3080    | -0.1452       | 0.2409        | 0.3417    |
| 1283 | 8170671 | ATP2B3     | 0.0000     | 0.0000        | -0.3413       | 0.3206    |
| 1284 | 7902158 | TCTEX1D1   | -0.1553    | 0.0000        | 0.3411        | 0.0000    |
| 1285 | 7988208 | CATSPER2P1 | 0.3409     | 0.0000        | -0.2555       | -0.0473   |
| 1286 | 8097692 | EDNRA      | -0.2182    | 0.0000        | 0.3408        | 0.0705    |
| 1287 | 8109093 | ABLIM3     | 0.0614     | 0.0000        | 0.0196        | -0.3407   |
| 1288 | 7988563 | SHC4       | -0.2284    | 0.0000        | 0.3406        | 0.0317    |
| 1289 | 8039698 | ZNF418     | 0.0000     | -0.3406       | 0.0000        | 0.2380    |
| 1290 | 7905154 | C1orf51    | 0.3404     | 0.0000        | -0.0980       | -0.3369   |
| 1291 | 8103389 | CTSO       | -0.3403    | 0.0000        | 0.0857        | 0.2612    |
| 1292 | 7979611 | ZBTB25     | 0.0104     | 0.0000        | -0.3401       | 0.0000    |
| 1293 | 8110886 | MED10      | 0.0000     | 0.3400        | 0.0000        | 0.0000    |
| 1294 | 8091863 | SLITRK3    | 0.0079     | 0.0539        | 0.0000        | -0.3400   |
| 1295 | 7971159 | TNAP       | -0.1884    | -0.0958       | 0.3399        | 0.0924    |
| 1296 | 8165672 | RFC1       | 0.0000     | 0.2621        | 0.0000        | -0.3393   |
| 1297 | 8103260 | DCHS2      | 0.0000     | 0.2483        | 0.0000        | -0.3390   |
| 1298 | 7943369 | TMEM133    | 0.0000     | -0.3390       | 0.0805        | 0.0000    |
| 1299 | 7903592 | KIAA1324   | 0.0000     | 0.3389        | 0.0000        | 0.0000    |
| 1300 | 8171684 | SH3KBP1    | 0.0000     | 0.0000        | 0.3389        | -0.0606   |

| #    | ID      | Name        | SDHB.score | SDHD-AT.score | SDHD-HN.score | VHL.score |
|------|---------|-------------|------------|---------------|---------------|-----------|
| 1301 | 7952526 | CDON        | 0.2916     | 0.0000        | 0.0000        | -0.3387   |
| 1302 | 8132097 | FAM188B     | -0.2621    | 0.0000        | 0.0000        | 0.3385    |
| 1303 | 8155734 | FAM189A2    | 0.0000     | 0.0000        | -0.2546       | 0.3385    |
| 1304 | 8152976 | TMEM71      | -0.3384    | 0.0000        | 0.0765        | 0.1785    |
| 1305 | 8088866 | CNTN3       | -0.0833    | 0.0000        | -0.1024       | 0.3383    |
| 1306 | 8046555 | HOXD4       | 0.0000     | 0.0000        | -0.3383       | 0.0000    |
| 1307 | 7951077 | SESN3       | 0.3379     | 0.0246        | -0.2313       | -0.3333   |
| 1308 | 8148476 | DENND3      | -0.2451    | -0.0940       | 0.0678        | 0.3375    |
| 1309 | 7940835 | COX8A       | 0.2107     | 0.0000        | 0.0000        | -0.3375   |
| 1310 | 8014115 | MYO1D       | 0.0000     | 0.0000        | 0.3375        | 0.0000    |
| 1311 | 7893558 | ---         | -0.0563    | 0.3374        | 0.0000        | 0.0000    |
| 1312 | 7997642 | CRISPLD2    | -0.2321    | -0.1859       | 0.3374        | 0.1960    |
| 1313 | 7915955 | SPATA6      | -0.3374    | 0.0000        | 0.0415        | 0.2788    |
| 1314 | 8120402 | BAG2        | 0.0267     | 0.0000        | 0.0000        | -0.3374   |
| 1315 | 7894878 | ---         | 0.0456     | 0.0000        | -0.3373       | 0.0000    |
| 1316 | 7972055 | KCTD12      | -0.1827    | 0.0000        | 0.3372        | 0.0000    |
| 1317 | 8140504 | MAGI2       | 0.0000     | 0.0000        | -0.3372       | 0.0000    |
| 1318 | 8155345 | FAM74A3     | -0.0155    | 0.0000        | 0.3370        | 0.0000    |
| 1319 | 8095834 | SHROOM3     | 0.0000     | 0.0000        | -0.3369       | 0.0623    |
| 1320 | 7894262 | ---         | 0.0000     | 0.3368        | 0.0000        | -0.1922   |
| 1321 | 8089145 | ABI3BP      | 0.0000     | 0.0000        | 0.3368        | 0.0000    |
| 1322 | 8153959 | DOCK8       | -0.3144    | 0.0000        | 0.3368        | 0.2103    |
| 1323 | 8096130 | CDS1        | 0.0820     | 0.0000        | 0.0000        | -0.3363   |
| 1324 | 8059578 | ---         | 0.0000     | 0.0000        | -0.3362       | 0.2210    |
| 1325 | 8162147 | ZCCHC6      | -0.2122    | 0.0000        | 0.0000        | 0.3359    |
| 1326 | 8148049 | NOV         | -0.3357    | 0.0000        | 0.2061        | 0.2798    |
| 1327 | 7915504 | ELOVL1      | -0.2604    | 0.0000        | 0.3356        | 0.0000    |
| 1328 | 8103789 | GPM6A       | 0.0000     | 0.0000        | 0.2401        | -0.3356   |
| 1329 | 8090690 | CPNE4       | 0.3354     | 0.0000        | 0.0000        | -0.3321   |
| 1330 | 7972157 | EDNRB       | -0.3248    | 0.0000        | 0.0000        | 0.3352    |
| 1331 | 8137232 | GIMAP8      | -0.2979    | 0.0000        | 0.3347        | 0.1611    |
| 1332 | 7943577 | RAB39       | 0.3346     | 0.0000        | -0.0234       | -0.1135   |
| 1333 | 8037459 | ZNF285A     | 0.0286     | 0.0000        | -0.3343       | 0.0000    |
| 1334 | 7982094 | SNORD115-44 | 0.0000     | 0.3343        | 0.0000        | 0.0000    |
| 1335 | 8118833 | UHRF1BP1    | 0.0282     | 0.0000        | 0.0000        | -0.3343   |
| 1336 | 8173444 | IL2RG       | 0.0000     | 0.0000        | 0.3342        | 0.0000    |
| 1337 | 8141052 | PON1        | 0.0000     | 0.0000        | 0.0000        | 0.3338    |
| 1338 | 7974920 | SYNE2       | 0.0000     | -0.3338       | 0.1575        | 0.0377    |
| 1339 | 7902565 | LPHN2       | -0.3338    | 0.0000        | 0.2549        | 0.2134    |
| 1340 | 7901765 | HOOK1       | 0.0000     | 0.3337        | 0.0000        | 0.0000    |
| 1341 | 8117321 | TRIM38      | -0.3337    | 0.0000        | 0.3258        | 0.1123    |
| 1342 | 8061272 | C2orf26     | -0.3337    | 0.2594        | 0.0000        | 0.1689    |
| 1343 | 8163896 | STOM        | -0.2942    | 0.0000        | 0.3335        | 0.1566    |
| 1344 | 8025076 | VAV1        | -0.1012    | 0.0000        | 0.3334        | 0.0000    |
| 1345 | 7982845 | VPS18       | 0.1435     | 0.0000        | 0.0000        | -0.3334   |
| 1346 | 8044021 | IL1RL1      | -0.3035    | 0.0000        | 0.0860        | 0.3333    |
| 1347 | 7982040 | SNORD115-17 | 0.0000     | 0.3331        | 0.0000        | 0.0000    |
| 1348 | 8152506 | SAMD12      | 0.0000     | 0.0890        | 0.0000        | -0.3329   |
| 1349 | 7899005 | TMEM50A     | -0.3329    | 0.0000        | 0.1886        | 0.1920    |
| 1350 | 8127051 | TRAM2       | -0.0419    | -0.0812       | 0.3326        | 0.0000    |
| 1351 | 7897449 | SPSB1       | -0.1519    | 0.0000        | 0.3325        | 0.0000    |
| 1352 | 8121370 | ARMC2       | -0.1881    | 0.0000        | 0.0000        | 0.3323    |
| 1353 | 8053718 | ---         | 0.0000     | 0.0000        | 0.3323        | 0.0000    |
| 1354 | 8099132 | CYTL1       | -0.0752    | 0.0000        | 0.3322        | 0.0000    |
| 1355 | 7899774 | HDAC1       | -0.3321    | 0.0000        | 0.0922        | 0.0349    |
| 1356 | 8134030 | STEAP1      | 0.0000     | 0.0000        | 0.3320        | -0.0535   |
| 1357 | 7977621 | NDRG2       | -0.2969    | 0.0000        | 0.0000        | 0.3320    |
| 1358 | 7972239 | SLITRK6     | 0.0000     | -0.3319       | 0.0000        | 0.0095    |
| 1359 | 7943424 | BIRC2       | 0.0000     | -0.3317       | 0.0000        | 0.0000    |
| 1360 | 8163002 | KLF4        | -0.3315    | 0.0000        | 0.2649        | 0.1540    |
| 1361 | 7902687 | CYR61       | -0.3314    | 0.0000        | 0.2684        | 0.1690    |
| 1362 | 7898894 | C1orf128    | -0.0883    | 0.3313        | 0.0000        | 0.0000    |

| #    | ID      | Name        | SDHB.score | SDHD-AT.score | SDHD-HN.score | VHL.score |
|------|---------|-------------|------------|---------------|---------------|-----------|
| 1363 | 7950235 | STARD10     | 0.2791     | 0.0100        | -0.0916       | -0.3311   |
| 1364 | 7986637 | ---         | 0.0000     | 0.0000        | 0.3311        | 0.0000    |
| 1365 | 7982086 | SNORD115-40 | -0.0269    | 0.3309        | 0.0000        | 0.0000    |
| 1366 | 8034940 | NOTCH3      | -0.1088    | -0.0372       | 0.3308        | 0.0000    |
| 1367 | 8140534 | SEMA3C      | -0.1001    | -0.0806       | 0.3307        | 0.0000    |
| 1368 | 8103240 | ANXA2P1     | -0.1344    | 0.0000        | 0.3307        | 0.0000    |
| 1369 | 8094228 | BST1        | -0.1234    | 0.0000        | 0.3301        | 0.0000    |
| 1370 | 7916120 | TXNDC12     | -0.3300    | 0.1460        | 0.0000        | 0.1491    |
| 1371 | 7948667 | AHNAK       | -0.0663    | -0.3300       | 0.2994        | 0.0564    |
| 1372 | 7935180 | PDLIM1      | -0.1497    | -0.0634       | 0.3298        | 0.0300    |
| 1373 | 8140556 | HGF         | -0.2988    | -0.0040       | 0.3298        | 0.2090    |
| 1374 | 7944769 | GRAMD1B     | 0.0000     | 0.0000        | -0.3297       | 0.2477    |
| 1375 | 7916747 | JAK1        | -0.2492    | 0.0000        | 0.3295        | 0.0785    |
| 1376 | 7894272 | ---         | -0.0830    | 0.3294        | 0.0000        | 0.0000    |
| 1377 | 8095110 | KIT         | -0.0477    | 0.0000        | 0.3288        | 0.0000    |
| 1378 | 8114797 | SPRY4       | 0.0000     | 0.0000        | -0.3284       | 0.0556    |
| 1379 | 8140463 | FGL2        | -0.2964    | 0.0000        | 0.3283        | 0.0989    |
| 1380 | 8141580 | ACTL6B      | 0.1599     | 0.2351        | 0.0000        | -0.3283   |
| 1381 | 8102792 | PCDH18      | -0.1914    | 0.0000        | 0.3281        | 0.0000    |
| 1382 | 8030383 | RCN3        | 0.0000     | -0.0356       | 0.3280        | 0.0000    |
| 1383 | 8113103 | C5orf36     | -0.3277    | 0.0000        | 0.0000        | 0.2288    |
| 1384 | 7900922 | ATP6V0B     | -0.0217    | 0.3277        | 0.0000        | 0.0000    |
| 1385 | 7953291 | CD9         | -0.1509    | -0.2091       | 0.0000        | 0.3274    |
| 1386 | 7976814 | SNORD114-2  | 0.0000     | 0.0000        | -0.3274       | 0.2064    |
| 1387 | 7936559 | PDZD8       | 0.0651     | 0.0000        | 0.0000        | -0.3274   |
| 1388 | 8149264 | PPP1R3B     | 0.1250     | 0.0000        | -0.3272       | 0.0000    |
| 1389 | 8105579 | LRRRC70     | -0.1615    | 0.0000        | 0.3270        | 0.0000    |
| 1390 | 8047403 | CASP10      | -0.2464    | 0.0000        | 0.3270        | 0.0815    |
| 1391 | 7917370 | COL24A1     | 0.0000     | -0.0857       | 0.3267        | 0.0000    |
| 1392 | 7960682 | C12orf53    | 0.1315     | 0.0000        | 0.0000        | -0.3266   |
| 1393 | 8135587 | CAV2        | -0.1574    | 0.0000        | 0.3266        | 0.0000    |
| 1394 | 7893494 | ---         | 0.0928     | -0.3265       | 0.0000        | 0.0000    |
| 1395 | 7894688 | ---         | 0.0000     | -0.1217       | 0.0000        | 0.3265    |
| 1396 | 7905733 | HAX1        | 0.1133     | 0.1699        | 0.0000        | -0.3261   |
| 1397 | 7982254 | ---         | 0.0000     | -0.0562       | -0.3261       | 0.1055    |
| 1398 | 7922525 | ASTN1       | 0.2018     | 0.0000        | -0.3261       | -0.0092   |
| 1399 | 7934297 | ---         | 0.0000     | -0.0574       | -0.1216       | 0.3260    |
| 1400 | 8078350 | TGFBR2      | -0.3143    | 0.0000        | 0.3259        | 0.2030    |
| 1401 | 8163255 | ---         | 0.0000     | 0.0000        | 0.3258        | 0.0000    |
| 1402 | 8014812 | STAC2       | 0.0000     | 0.0000        | 0.3256        | -0.0774   |
| 1403 | 8011884 | NLRP1       | -0.0754    | 0.0000        | 0.3255        | 0.0000    |
| 1404 | 8126750 | ENPP5       | 0.0000     | 0.3254        | -0.0578       | 0.0000    |
| 1405 | 8021301 | RAB27B      | 0.0000     | 0.0000        | -0.3253       | 0.0000    |
| 1406 | 8139021 | KIAA0895    | 0.0000     | 0.0695        | -0.3253       | 0.0000    |
| 1407 | 8174664 | ---         | 0.0394     | 0.0000        | -0.3252       | 0.0000    |
| 1408 | 8008682 | MSI2        | 0.0182     | 0.0000        | -0.3252       | 0.0000    |
| 1409 | 7956878 | IRAK3       | -0.3251    | 0.0000        | 0.2899        | 0.1996    |
| 1410 | 8005200 | SNORD49B    | 0.2309     | 0.0000        | 0.0000        | -0.3251   |
| 1411 | 8038584 | LRRRC4B     | 0.1008     | 0.1950        | 0.0000        | -0.3249   |
| 1412 | 8048976 | ---         | -0.1649    | 0.0000        | 0.3246        | 0.0211    |
| 1413 | 7972557 | GPR183      | -0.1972    | 0.0000        | 0.3244        | 0.0276    |
| 1414 | 8013804 | DHRS13      | 0.1092     | 0.0000        | 0.0000        | -0.3244   |
| 1415 | 7938213 | SYT9        | 0.1713     | 0.0000        | 0.0000        | -0.3244   |
| 1416 | 7950885 | FZD4        | -0.2455    | -0.0329       | 0.0443        | 0.3242    |
| 1417 | 7954717 | BICD1       | 0.0553     | 0.0000        | -0.3242       | 0.0000    |
| 1418 | 7917503 | GBP3        | -0.1273    | 0.0000        | 0.3241        | 0.0000    |
| 1419 | 7969330 | PCDH17      | -0.3096    | 0.0000        | 0.3238        | 0.1563    |
| 1420 | 8073296 | MCHR1       | -0.0946    | 0.0000        | 0.0000        | 0.3238    |
| 1421 | 8049246 | INPP5D      | 0.0000     | -0.3237       | 0.0285        | 0.1008    |
| 1422 | 7925250 | GNG4        | 0.3118     | 0.0000        | -0.1518       | -0.3235   |
| 1423 | 8019622 | TMEM106A    | -0.0200    | -0.1720       | 0.3223        | 0.0000    |
| 1424 | 7909027 | NFASC       | 0.0000     | 0.0000        | -0.3222       | 0.0000    |

| #    | ID      | Name       | SDHB.score | SDHD-AT.score | SDHD-HN.score | VHL.score |
|------|---------|------------|------------|---------------|---------------|-----------|
| 1425 | 7923141 | DENND1B    | 0.0183     | 0.0000        | -0.3222       | 0.0000    |
| 1426 | 7895889 | ---        | 0.0152     | -0.3222       | 0.0000        | 0.0000    |
| 1427 | 7938528 | PARVA      | -0.2256    | -0.1950       | 0.3221        | 0.2005    |
| 1428 | 7962183 | AK3L1      | -0.1106    | 0.0000        | 0.0000        | 0.3221    |
| 1429 | 8102800 | SLC7A11    | 0.0000     | 0.0573        | 0.0000        | -0.3219   |
| 1430 | 7939024 | ANO3       | -0.1640    | 0.0000        | 0.0000        | 0.3218    |
| 1431 | 7905299 | PRUNE      | 0.1606     | 0.0000        | 0.0000        | -0.3218   |
| 1432 | 8078397 | CMTM8      | -0.1063    | 0.0000        | 0.3218        | 0.0000    |
| 1433 | 7924071 | KCNH1      | 0.0000     | 0.0000        | -0.3217       | 0.0000    |
| 1434 | 8043782 | CNGA3      | 0.0000     | 0.0000        | 0.0000        | 0.3215    |
| 1435 | 7923131 | DENND1B    | 0.0147     | 0.0000        | -0.3215       | 0.0000    |
| 1436 | 7906757 | FCGR2A     | -0.3211    | 0.0000        | 0.3199        | 0.2365    |
| 1437 | 8040985 | ZNF512     | 0.0795     | 0.0000        | -0.3211       | 0.0000    |
| 1438 | 7920877 | ARHGEF2    | 0.0000     | 0.0000        | 0.3205        | 0.0000    |
| 1439 | 7955943 | PDE1B      | -0.1718    | 0.0000        | 0.3205        | 0.0000    |
| 1440 | 8115355 | GLRA1      | 0.0000     | 0.0000        | -0.0256       | 0.3203    |
| 1441 | 7901385 | OSBPL9     | -0.3202    | 0.0000        | 0.0753        | 0.0327    |
| 1442 | 8139411 | TMED4      | 0.0361     | 0.1916        | -0.3201       | 0.0000    |
| 1443 | 7894381 | ---        | 0.0000     | -0.3201       | 0.0000        | 0.0000    |
| 1444 | 7904018 | CTTNBP2NL  | -0.2754    | 0.0000        | 0.3200        | 0.1131    |
| 1445 | 8027621 | GPI        | 0.0000     | 0.0000        | -0.3197       | 0.1270    |
| 1446 | 7988400 | SHF        | 0.0668     | 0.0687        | -0.3195       | 0.0000    |
| 1447 | 8146633 | LOC643763  | -0.0722    | 0.0000        | 0.0000        | 0.3194    |
| 1448 | 8149986 | ZNF395     | 0.0000     | 0.0000        | -0.1195       | 0.3193    |
| 1449 | 7984016 | FAM148A    | 0.0000     | 0.0000        | -0.3191       | 0.0000    |
| 1450 | 8060758 | PRNP       | 0.2274     | 0.0000        | 0.0000        | -0.3191   |
| 1451 | 7971573 | RCBTB2     | -0.3190    | 0.0000        | 0.3169        | 0.2030    |
| 1452 | 7899627 | TINAGL1    | -0.2108    | 0.0000        | 0.3190        | 0.0000    |
| 1453 | 7896712 | ---        | 0.0000     | 0.0000        | 0.3189        | -0.2814   |
| 1454 | 7953264 | KCNA6      | 0.0000     | 0.0000        | 0.0000        | 0.3188    |
| 1455 | 7976812 | SNORD113-4 | 0.0000     | 0.0000        | -0.3188       | 0.2579    |
| 1456 | 8081537 | TRAT1      | 0.0000     | 0.0000        | 0.3188        | 0.0000    |
| 1457 | 8037430 | ZNF404     | 0.0204     | 0.0000        | -0.3187       | 0.0000    |
| 1458 | 8076586 | SCUBE1     | 0.0000     | 0.0000        | -0.2068       | 0.3185    |
| 1459 | 8072659 | TOM1       | 0.0000     | 0.3182        | 0.0000        | -0.1896   |
| 1460 | 7895586 | ---        | 0.0000     | -0.3181       | 0.0397        | 0.0000    |
| 1461 | 7896752 | ---        | 0.0000     | 0.3180        | 0.0000        | -0.3072   |
| 1462 | 8133876 | CD36       | -0.2474    | 0.0000        | 0.3179        | 0.0756    |
| 1463 | 8006820 | LASP1      | -0.0452    | 0.0000        | 0.3177        | 0.0000    |
| 1464 | 8165808 | XG         | 0.0000     | 0.0000        | 0.3175        | -0.0696   |
| 1465 | 7895148 | ---        | 0.3050     | 0.0000        | 0.0000        | -0.3173   |
| 1466 | 8005687 | FAM106A    | 0.0000     | -0.3173       | 0.0000        | 0.0000    |
| 1467 | 7977273 | ADSSL1     | 0.0000     | 0.0000        | -0.2162       | 0.3172    |
| 1468 | 8021442 | ZNF532     | -0.3172    | 0.0000        | 0.1977        | 0.2247    |
| 1469 | 8164293 | AK1        | 0.0425     | 0.2078        | 0.0000        | -0.3172   |
| 1470 | 7916343 | YIPF1      | -0.3172    | 0.0887        | 0.0610        | 0.0000    |
| 1471 | 8119016 | MAPK13     | 0.0000     | 0.0000        | -0.3007       | 0.3171    |
| 1472 | 7943552 | AASDHPPT   | 0.3170     | 0.0000        | -0.0491       | -0.1427   |
| 1473 | 8061075 | SNRBP2     | 0.0000     | 0.1688        | 0.0000        | -0.3169   |
| 1474 | 7941565 | KLC2       | 0.2876     | 0.0000        | 0.0000        | -0.3168   |
| 1475 | 8047763 | ---        | -0.0649    | -0.3168       | 0.1150        | 0.1617    |
| 1476 | 8009526 | SSTR2      | 0.0000     | 0.0000        | 0.0000        | -0.3165   |
| 1477 | 7973797 | COCH       | 0.0000     | 0.1415        | 0.0000        | -0.3165   |
| 1478 | 8016739 | TOB1       | 0.0000     | 0.0000        | -0.3163       | 0.0000    |
| 1479 | 7959100 | ---        | 0.0927     | 0.0711        | -0.3162       | 0.0000    |
| 1480 | 8138157 | COL28A1    | -0.2230    | 0.0000        | 0.0000        | 0.3161    |
| 1481 | 7893902 | ---        | 0.0000     | -0.3161       | 0.0000        | 0.0618    |
| 1482 | 7976560 | BDKRB2     | -0.1390    | 0.0000        | 0.3160        | 0.0000    |
| 1483 | 8024888 | C19orf30   | 0.1301     | 0.0000        | -0.3159       | 0.0000    |
| 1484 | 8154245 | PDCD1LG2   | -0.1173    | 0.0000        | 0.3158        | 0.0000    |
| 1485 | 8152764 | MTSS1      | -0.3156    | 0.0000        | 0.0000        | 0.2276    |
| 1486 | 8066214 | TGM2       | 0.0000     | 0.0000        | 0.3155        | 0.0000    |



| #    | ID      | Name     | SDHB.score | SDHD-AT.score | SDHD-HN.score | VHL.score |
|------|---------|----------|------------|---------------|---------------|-----------|
| 1487 | 7954810 | LRRK2    | -0.1457    | 0.0000        | 0.0000        | 0.3155    |
| 1488 | 7978776 | C1orf106 | 0.0000     | -0.0634       | 0.3154        | 0.0000    |
| 1489 | 7914153 | EYA3     | -0.3154    | 0.0000        | 0.0000        | 0.0601    |
| 1490 | 8058927 | TMBIM1   | 0.0000     | 0.0000        | 0.3154        | 0.0000    |
| 1491 | 8174779 | LAMP2    | 0.0227     | 0.0000        | 0.0000        | -0.3153   |
| 1492 | 8118498 | CYP21A2  | -0.0714    | 0.0000        | 0.0000        | 0.3152    |
| 1493 | 7965541 | FGD6     | -0.1199    | -0.0480       | 0.3151        | 0.0000    |
| 1494 | 7932985 | NRP1     | -0.0699    | -0.3038       | 0.3149        | 0.0396    |
| 1495 | 8162570 | HSD17B3  | -0.0434    | 0.0000        | 0.0000        | 0.3148    |
| 1496 | 7953878 | CLEC2D   | -0.0847    | 0.0000        | 0.3148        | 0.0000    |
| 1497 | 8168470 | COX7B    | 0.0000     | 0.3146        | 0.0000        | 0.0000    |
| 1498 | 7970455 | CRYL1    | 0.0293     | 0.2627        | 0.0000        | -0.3144   |
| 1499 | 8176624 | DDX3Y    | 0.0000     | 0.0000        | -0.3143       | 0.0409    |
| 1500 | 7901299 | CMPK1    | -0.3138    | 0.0000        | 0.2861        | 0.0000    |
| 1501 | 7970033 | COL4A2   | -0.0949    | -0.3137       | 0.2692        | 0.1069    |
| 1502 | 7965226 | RASSF9   | -0.1170    | 0.0000        | 0.3137        | 0.0000    |
| 1503 | 7906486 | SLAMF8   | 0.0000     | -0.0470       | 0.3137        | 0.0000    |
| 1504 | 7901135 | TMEM69   | -0.0449    | 0.3136        | 0.0000        | 0.0000    |
| 1505 | 8113512 | EPB41L4A | -0.1361    | -0.1192       | 0.3134        | 0.0470    |
| 1506 | 8122176 | TCF21    | -0.0052    | 0.0000        | -0.3133       | 0.2640    |
| 1507 | 8060854 | PLCB1    | 0.0000     | -0.3132       | 0.1559        | 0.0000    |
| 1508 | 7894958 | ---      | 0.0000     | -0.3131       | 0.0000        | 0.0627    |
| 1509 | 8168179 | DLG3     | 0.0000     | 0.0481        | 0.0000        | -0.3130   |
| 1510 | 8077490 | LMCD1    | 0.0000     | 0.0000        | 0.3130        | 0.0000    |
| 1511 | 8027876 | TMEM147  | 0.0811     | 0.2724        | 0.0000        | -0.3128   |
| 1512 | 8009176 | TACO1    | 0.0019     | 0.1500        | 0.0000        | -0.3127   |
| 1513 | 8132503 | STK17A   | 0.0000     | 0.0000        | 0.3123        | 0.0000    |
| 1514 | 7900129 | C1orf113 | 0.0000     | 0.0000        | -0.0673       | 0.3121    |
| 1515 | 8069301 | COL6A2   | -0.0384    | -0.0861       | 0.3121        | 0.0000    |
| 1516 | 8155192 | GLIPR2   | 0.0000     | 0.0000        | 0.3117        | 0.0000    |
| 1517 | 8007620 | GRN      | 0.0298     | 0.1829        | 0.0000        | -0.3116   |
| 1518 | 8057506 | FRZB     | -0.2413    | 0.0000        | 0.3115        | 0.0000    |
| 1519 | 8114618 | NDUFA2   | 0.0000     | 0.3113        | 0.0000        | -0.1394   |
| 1520 | 7916077 | NRD1     | -0.3112    | 0.0000        | 0.0000        | 0.2025    |
| 1521 | 7913655 | ID3      | -0.3066    | 0.0000        | 0.3111        | 0.0113    |
| 1522 | 7900426 | SMAP2    | -0.3110    | 0.0000        | 0.0000        | 0.2347    |
| 1523 | 7998510 | CLCN7    | 0.1638     | 0.0000        | 0.0000        | -0.3108   |
| 1524 | 7966690 | TBX3     | -0.0066    | 0.0000        | 0.0000        | 0.3107    |
| 1525 | 8041763 | PRKCE    | 0.0912     | 0.0000        | -0.3107       | 0.0000    |
| 1526 | 8103769 | HPGD     | 0.0000     | 0.3105        | 0.0000        | -0.1606   |
| 1527 | 7902269 | SFRS11   | -0.3104    | 0.0000        | 0.0000        | 0.2460    |
| 1528 | 7997427 | CMIP     | -0.3104    | 0.0000        | 0.1290        | 0.2399    |
| 1529 | 8145293 | ADAM28   | -0.2668    | -0.2434       | 0.3100        | 0.2874    |
| 1530 | 7905817 | CHRN2    | 0.2845     | 0.0045        | -0.1342       | -0.3099   |
| 1531 | 7901915 | ALG6     | -0.3096    | 0.0000        | 0.1641        | 0.1437    |
| 1532 | 8021245 | DCC      | 0.1760     | 0.0000        | 0.0000        | -0.3095   |
| 1533 | 7916928 | ANKRD13C | -0.3094    | 0.0000        | 0.0000        | 0.0454    |
| 1534 | 7928815 | ---      | 0.0065     | 0.0000        | -0.3093       | 0.0000    |
| 1535 | 8157761 | NEK6     | -0.1965    | -0.0056       | 0.3089        | 0.0810    |
| 1536 | 7960865 | SLC2A3   | -0.2259    | 0.0000        | 0.0000        | 0.3089    |
| 1537 | 7933760 | CCDC6    | 0.0000     | 0.0000        | 0.0000        | -0.3088   |
| 1538 | 7915015 | GNL2     | -0.2521    | 0.0000        | 0.0000        | 0.3088    |
| 1539 | 7894070 | ---      | 0.0000     | 0.2051        | 0.0000        | -0.3087   |
| 1540 | 8125234 | TNXB     | 0.0000     | 0.0000        | 0.3086        | 0.0000    |
| 1541 | 8164217 | FAM129B  | -0.1400    | 0.0000        | 0.3084        | 0.0000    |
| 1542 | 8142981 | PODXL    | -0.2815    | 0.0000        | 0.3083        | 0.1424    |
| 1543 | 8178177 | CYP21A2  | -0.0719    | 0.0000        | 0.0000        | 0.3083    |
| 1544 | 8092230 | ZMAT3    | 0.0625     | 0.0000        | 0.0000        | -0.3082   |
| 1545 | 8085340 | VGLL4    | 0.0000     | 0.0000        | 0.3082        | 0.0000    |
| 1546 | 8091402 | TM4SF18  | -0.3079    | 0.0000        | 0.0745        | 0.2112    |
| 1547 | 8027258 | ZNF90    | 0.0000     | 0.3078        | 0.0000        | -0.2004   |
| 1548 | 8167656 | MAGED1   | 0.0000     | 0.0000        | -0.3076       | 0.0000    |

| #    | ID      | Name       | SDHB.score | SDHD-AT.score | SDHD-HN.score | VHL.score |
|------|---------|------------|------------|---------------|---------------|-----------|
| 1549 | 7971122 | ---        | -0.0645    | 0.0000        | 0.3076        | 0.0000    |
| 1550 | 7915261 | TRIT1      | -0.3075    | 0.1481        | 0.0000        | 0.2290    |
| 1551 | 8007483 | TMEM106A   | -0.0172    | -0.2042       | 0.3074        | 0.0000    |
| 1552 | 7935169 | CYP2C8     | 0.0000     | 0.0000        | -0.3073       | 0.0000    |
| 1553 | 8053715 | ---        | 0.0000     | 0.0000        | 0.3071        | 0.0000    |
| 1554 | 7942596 | SERPINH1   | -0.0993    | -0.0732       | 0.3071        | 0.0000    |
| 1555 | 7999754 | XYLT1      | 0.2471     | 0.0122        | -0.0604       | -0.3070   |
| 1556 | 8090852 | AMOTL2     | -0.0161    | 0.0000        | 0.3070        | 0.0000    |
| 1557 | 7915827 | LRRRC41    | 0.0000     | 0.3065        | 0.0000        | 0.0000    |
| 1558 | 8174513 | CHRD1      | 0.0000     | 0.0000        | 0.3064        | 0.0000    |
| 1559 | 8066407 | FITM2      | 0.1473     | 0.0000        | 0.0000        | -0.3064   |
| 1560 | 8100109 | GABRA2     | 0.0000     | 0.0000        | 0.0000        | 0.3062    |
| 1561 | 7900051 | EIF2C3     | -0.3061    | 0.0000        | 0.0000        | 0.1983    |
| 1562 | 8123609 | SERPINB9   | -0.3061    | 0.0000        | 0.0000        | 0.2215    |
| 1563 | 8180363 | ---        | 0.0000     | -0.3061       | 0.0418        | 0.0000    |
| 1564 | 7949503 | EFEMP2     | -0.0871    | 0.0000        | 0.3060        | 0.0000    |
| 1565 | 8172296 | NDUFB11    | 0.0000     | 0.3059        | 0.0000        | -0.1524   |
| 1566 | 7917455 | SEPT15     | -0.3059    | 0.0000        | 0.0425        | 0.0191    |
| 1567 | 8046546 | HOXD8      | 0.0000     | 0.0000        | -0.3059       | 0.0000    |
| 1568 | 7903519 | PRPF38B    | -0.3058    | 0.0000        | 0.1663        | 0.1082    |
| 1569 | 8044295 | SH3RF3     | -0.0652    | 0.0000        | 0.0000        | 0.3058    |
| 1570 | 8096160 | ARHGAP24   | -0.0439    | 0.0000        | 0.3056        | 0.0000    |
| 1571 | 8166999 | CHST7      | 0.0424     | 0.3056        | -0.2259       | -0.0572   |
| 1572 | 8097991 | TDO2       | -0.2400    | -0.0132       | 0.3054        | 0.1469    |
| 1573 | 8005471 | RPS28      | 0.0635     | 0.1894        | 0.0000        | -0.3054   |
| 1574 | 7944382 | VPS11      | 0.2875     | 0.0000        | 0.0000        | -0.3051   |
| 1575 | 7960933 | M6PR       | 0.0000     | 0.0109        | 0.0000        | -0.3050   |
| 1576 | 7899957 | ZMYM4      | -0.3048    | 0.0000        | 0.0000        | 0.1779    |
| 1577 | 8078196 | KCNH8      | 0.0000     | 0.1815        | 0.0000        | -0.3048   |
| 1578 | 7913415 | USP48      | -0.3048    | 0.0000        | 0.0000        | 0.2305    |
| 1579 | 7978272 | CIDEB      | -0.1462    | 0.0000        | 0.0000        | 0.3048    |
| 1580 | 7894916 | ---        | 0.0000     | 0.0088        | 0.0000        | -0.3048   |
| 1581 | 8169083 | ZCCHC18    | 0.1694     | 0.0000        | 0.0000        | -0.3044   |
| 1582 | 7940259 | MS4A7      | -0.2802    | 0.0000        | 0.3044        | 0.1123    |
| 1583 | 8149574 | CSGALNACT1 | -0.2758    | -0.1283       | 0.2168        | 0.3042    |
| 1584 | 8091972 | MECOM      | -0.0317    | 0.0000        | 0.3041        | 0.0000    |
| 1585 | 7893333 | ---        | -0.0270    | 0.3041        | 0.0000        | 0.0000    |
| 1586 | 7893308 | ---        | 0.2550     | -0.3040       | -0.0169       | 0.0000    |
| 1587 | 8066051 | NDRG3      | 0.1979     | 0.0000        | 0.0000        | -0.3040   |
| 1588 | 8043835 | C2orf15    | 0.0000     | 0.3040        | 0.0000        | -0.2507   |
| 1589 | 7914530 | BSDC1      | -0.3039    | 0.1422        | 0.0000        | 0.1337    |
| 1590 | 8013112 | RASD1      | 0.0000     | 0.0000        | 0.0000        | 0.3039    |
| 1591 | 7894702 | ---        | 0.1538     | -0.3037       | 0.0000        | 0.0000    |
| 1592 | 7920291 | S100A16    | -0.2191    | -0.0181       | 0.3035        | 0.1215    |
| 1593 | 7926484 | ---        | -0.3035    | 0.0000        | 0.0000        | 0.2706    |
| 1594 | 8024816 | FSD1       | 0.0119     | 0.1878        | 0.0000        | -0.3034   |
| 1595 | 8072735 | APOL1      | -0.2669    | -0.0852       | 0.3033        | 0.2187    |
| 1596 | 7894296 | ---        | 0.0000     | -0.3029       | 0.0000        | 0.0491    |
| 1597 | 7913300 | HP1BP3     | -0.3029    | 0.0000        | 0.0000        | 0.2857    |
| 1598 | 7899361 | STX12      | -0.3028    | 0.0000        | 0.1107        | 0.0000    |
| 1599 | 7929533 | ---        | -0.1248    | 0.0000        | 0.3027        | 0.0000    |
| 1600 | 8158183 | DNM1       | 0.0101     | 0.0010        | 0.0000        | -0.3027   |
| 1601 | 7911241 | OR2L8      | 0.0708     | 0.3026        | 0.0000        | -0.2361   |
| 1602 | 8175177 | MBNL3      | 0.0000     | 0.0000        | -0.3023       | 0.0875    |
| 1603 | 8025395 | RPS28      | 0.0519     | 0.1917        | 0.0000        | -0.3023   |
| 1604 | 8160521 | MOBK12B    | -0.0202    | 0.0000        | 0.3022        | 0.0000    |
| 1605 | 8175666 | GABRE      | -0.1200    | -0.2601       | 0.0000        | 0.3022    |
| 1606 | 7943779 | C11orf1    | 0.2774     | 0.0000        | -0.0171       | -0.3019   |
| 1607 | 8017927 | ABCA9      | -0.3018    | 0.0000        | 0.2335        | 0.0143    |
| 1608 | 7900336 | ---        | -0.1901    | 0.0000        | 0.3018        | 0.0409    |
| 1609 | 7900576 | PPIH       | -0.3016    | 0.0540        | 0.0000        | 0.0140    |
| 1610 | 7899455 | PHACTR4    | -0.3016    | 0.0000        | 0.1704        | 0.0437    |

| #    | ID      | Name     | SDHB.score | SDHD-AT.score | SDHD-HN.score | VHL.score |
|------|---------|----------|------------|---------------|---------------|-----------|
| 1611 | 7901272 | CYP4X1   | -0.1443    | 0.0000        | 0.3015        | 0.0000    |
| 1612 | 8086344 | CX3CR1   | -0.0817    | 0.0000        | 0.3014        | 0.0000    |
| 1613 | 8102831 | C4orf49  | 0.0000     | 0.0000        | -0.3013       | 0.1491    |
| 1614 | 8088642 | LRIG1    | 0.0000     | 0.0000        | 0.3012        | 0.0000    |
| 1615 | 8147065 | RALYL    | 0.0000     | 0.0677        | -0.3012       | 0.0000    |
| 1616 | 7931281 | FANK1    | -0.0742    | -0.0142       | 0.0000        | 0.3011    |
| 1617 | 8073775 | FBLN1    | -0.0166    | 0.0000        | 0.3010        | 0.0000    |
| 1618 | 7992895 | ZNF434   | 0.3009     | 0.0000        | -0.2578       | 0.0000    |
| 1619 | 8062251 | EPB41L1  | 0.1188     | 0.0000        | -0.3008       | 0.0000    |
| 1620 | 8139737 | PSPH     | 0.0000     | 0.2296        | 0.0000        | -0.3008   |
| 1621 | 8048489 | ANKZF1   | -0.0231    | 0.0000        | 0.0000        | 0.3007    |
| 1622 | 8059279 | EPHA4    | -0.1454    | 0.0000        | 0.3006        | 0.0000    |
| 1623 | 8175860 | PDZD4    | 0.0103     | 0.0000        | -0.3005       | 0.0000    |
| 1624 | 7917649 | TGFBR3   | -0.3004    | 0.0000        | 0.1511        | 0.2316    |
| 1625 | 8112428 | CD180    | -0.0118    | -0.0232       | 0.3004        | 0.0000    |
| 1626 | 7909603 | NENF     | 0.0000     | 0.3003        | -0.0694       | -0.0495   |
| 1627 | 7893523 | ---      | 0.0000     | -0.3001       | 0.0000        | 0.0000    |
| 1628 | 7907611 | RASAL2   | -0.1020    | -0.1774       | 0.3000        | 0.0349    |
| 1629 | 7918457 | KCNA3    | -0.0855    | -0.1886       | 0.0000        | 0.2997    |
| 1630 | 8149898 | STMN4    | -0.1733    | 0.0620        | 0.2995        | 0.0000    |
| 1631 | 8092053 | SLC7A14  | 0.2031     | 0.0000        | 0.0000        | -0.2994   |
| 1632 | 8035494 | FKBP8    | 0.0000     | 0.2993        | 0.0000        | 0.0000    |
| 1633 | 7969533 | SLAIN1   | 0.0000     | 0.2993        | 0.0000        | -0.1434   |
| 1634 | 8122756 | PLEKHG1  | -0.2743    | -0.1642       | 0.2483        | 0.2992    |
| 1635 | 8139330 | CAMK2B   | 0.0000     | 0.0000        | -0.2444       | 0.2992    |
| 1636 | 7951157 | CCDC82   | 0.0385     | -0.2992       | 0.0000        | 0.0000    |
| 1637 | 7915758 | GPBP1L1  | -0.2991    | 0.0000        | 0.0000        | 0.1167    |
| 1638 | 8006762 | MRPL45   | 0.0000     | 0.1864        | 0.0000        | -0.2991   |
| 1639 | 8015456 | KLHL11   | 0.0959     | 0.0866        | 0.0000        | -0.2990   |
| 1640 | 7989473 | FAM148B  | -0.0133    | 0.0000        | -0.1338       | 0.2990    |
| 1641 | 7955974 | NEUROD4  | 0.0000     | 0.0000        | -0.2989       | 0.0000    |
| 1642 | 8141950 | RELN     | -0.0762    | 0.0594        | 0.2987        | 0.0000    |
| 1643 | 8066513 | SDC4     | 0.1389     | 0.0000        | -0.2987       | 0.0000    |
| 1644 | 7999387 | EMP2     | -0.0521    | -0.0800       | 0.2986        | 0.0000    |
| 1645 | 7939365 | FJX1     | -0.0094    | -0.1037       | 0.2986        | 0.0000    |
| 1646 | 7895842 | ---      | 0.0000     | 0.2985        | 0.0000        | -0.1444   |
| 1647 | 7915286 | PPT1     | -0.1578    | 0.2984        | 0.0000        | 0.0000    |
| 1648 | 8018694 | PRPSAP1  | 0.0000     | 0.0419        | 0.0000        | -0.2984   |
| 1649 | 8113938 | ACSL6    | 0.0905     | 0.2219        | 0.0000        | -0.2982   |
| 1650 | 7942957 | PRSS23   | 0.0000     | 0.0000        | 0.2981        | 0.0000    |
| 1651 | 8036403 | ZNF540   | 0.2980     | 0.0000        | -0.1314       | -0.1287   |
| 1652 | 8174051 | BTK      | -0.0439    | 0.0000        | 0.2980        | 0.0000    |
| 1653 | 7906021 | MSTO1    | 0.2979     | 0.0000        | -0.1777       | -0.1973   |
| 1654 | 8062123 | MMP24    | 0.0854     | 0.0000        | 0.0000        | -0.2979   |
| 1655 | 8164165 | HSPA5    | 0.1022     | 0.0000        | -0.2978       | 0.0000    |
| 1656 | 7940153 | FAM111A  | -0.2128    | -0.0435       | 0.0218        | 0.2977    |
| 1657 | 7914648 | PHC2     | -0.1644    | 0.0000        | 0.0000        | 0.2977    |
| 1658 | 8058849 | MARCH4   | 0.0000     | 0.0000        | -0.2975       | 0.0000    |
| 1659 | 7912385 | EXOSC10  | -0.2973    | 0.0000        | 0.0000        | 0.1822    |
| 1660 | 8060427 | STK35    | 0.0000     | 0.0000        | -0.2518       | 0.2973    |
| 1661 | 7996377 | CES8     | -0.0340    | 0.0000        | 0.0000        | 0.2971    |
| 1662 | 8127987 | SNORD50A | -0.1582    | 0.0000        | 0.0000        | 0.2971    |
| 1663 | 7894196 | ---      | -0.0341    | 0.0000        | -0.0650       | 0.2970    |
| 1664 | 7942824 | RPS28    | 0.0496     | 0.1872        | 0.0000        | -0.2966   |
| 1665 | 8098441 | ODZ3     | 0.0000     | 0.0706        | -0.2966       | 0.0000    |
| 1666 | 7969129 | PHF11    | -0.2965    | 0.0000        | 0.1326        | 0.2083    |
| 1667 | 7952268 | THY1     | -0.0877    | -0.0017       | 0.2963        | 0.0000    |
| 1668 | 7963946 | MMP19    | -0.1342    | 0.0000        | 0.2959        | 0.0000    |
| 1669 | 8148501 | PTP4A3   | -0.2748    | -0.0862       | 0.1966        | 0.2959    |
| 1670 | 8078898 | SLC25A38 | 0.0000     | 0.2355        | 0.0000        | -0.2955   |
| 1671 | 7978824 | RPS29    | 0.0000     | 0.2955        | 0.0000        | 0.0000    |
| 1672 | 7928395 | FUT11    | 0.0000     | -0.0985       | 0.0000        | 0.2954    |

| #    | ID      | Name       | SDHB.score | SDHD-AT.score | SDHD-HN.score | VHL.score |
|------|---------|------------|------------|---------------|---------------|-----------|
| 1673 | 8113709 | LOX        | 0.0000     | -0.1202       | 0.2953        | 0.0000    |
| 1674 | 7905974 | HCN3       | 0.2364     | 0.0000        | 0.0000        | -0.2953   |
| 1675 | 8115691 | SLIT3      | -0.0605    | 0.0000        | 0.0000        | 0.2952    |
| 1676 | 8127534 | C6orf150   | -0.1878    | 0.0000        | 0.2951        | 0.0000    |
| 1677 | 8042356 | MEIS1      | 0.0000     | 0.0000        | 0.0000        | 0.2951    |
| 1678 | 7974689 | DACT1      | -0.0808    | 0.0000        | 0.2951        | 0.0000    |
| 1679 | 8053064 | MOBK1B     | -0.0628    | 0.0000        | 0.2951        | 0.0000    |
| 1680 | 7899737 | EIF3I      | -0.2950    | 0.0000        | 0.1437        | 0.0000    |
| 1681 | 8080773 | RPP14      | 0.0000     | 0.2949        | 0.0000        | -0.2894   |
| 1682 | 8121850 | HEY2       | 0.0000     | 0.0000        | 0.2949        | 0.0000    |
| 1683 | 8028652 | ZFP36      | -0.2947    | 0.0000        | 0.1001        | 0.1935    |
| 1684 | 7902205 | IL12RB2    | 0.0000     | 0.0000        | 0.2944        | 0.0000    |
| 1685 | 7982248 | ---        | 0.2943     | 0.0000        | -0.0314       | -0.0947   |
| 1686 | 8111887 | PLCXD3     | 0.0000     | 0.1080        | -0.2942       | 0.1252    |
| 1687 | 8064375 | SRXN1      | 0.2323     | 0.0000        | -0.2941       | 0.0000    |
| 1688 | 7915882 | KIAA0494   | -0.2936    | 0.0000        | 0.0000        | 0.1302    |
| 1689 | 7997453 | PLCG2      | -0.2934    | 0.0000        | 0.1629        | 0.2793    |
| 1690 | 8177232 | KDM5D      | 0.0000     | 0.0000        | -0.2928       | 0.0074    |
| 1691 | 8133662 | RHBDD2     | 0.0000     | 0.2926        | 0.0000        | -0.2189   |
| 1692 | 7899310 | TMEM222    | 0.0000     | 0.2926        | 0.0000        | 0.0000    |
| 1693 | 7944991 | STT3A      | 0.2925     | -0.0392       | 0.0000        | -0.0094   |
| 1694 | 8108905 | KCTD16     | 0.2362     | 0.0000        | -0.2922       | 0.0000    |
| 1695 | 8047300 | AOX1       | -0.1769    | 0.0000        | 0.0000        | 0.2921    |
| 1696 | 8057771 | STAT4      | 0.0000     | 0.0000        | 0.2920        | 0.0000    |
| 1697 | 8168589 | ZNF711     | 0.0000     | 0.0000        | -0.2192       | 0.2920    |
| 1698 | 7916986 | NEGR1      | -0.1525    | 0.0000        | 0.0000        | 0.2916    |
| 1699 | 8073192 | UQCRRS1    | 0.0508     | 0.0099        | 0.0000        | -0.2914   |
| 1700 | 7902441 | ST6GALNAC5 | 0.0000     | 0.0000        | -0.1664       | 0.2913    |
| 1701 | 7894940 | ---        | 0.0000     | -0.2913       | 0.0000        | 0.1132    |
| 1702 | 7965224 | ---        | 0.0000     | 0.2911        | 0.0000        | -0.2210   |
| 1703 | 8132851 | VSTM2A     | 0.0000     | 0.1958        | -0.2910       | 0.0000    |
| 1704 | 8074845 | ZNF280B    | 0.1136     | 0.2035        | 0.0000        | -0.2909   |
| 1705 | 7921752 | ARHGAP30   | -0.0399    | 0.0000        | 0.2908        | 0.0000    |
| 1706 | 8044605 | LOC654433  | 0.0000     | 0.0000        | 0.0000        | 0.2907    |
| 1707 | 7951165 | PGR        | -0.0777    | -0.0815       | 0.2906        | 0.0000    |
| 1708 | 8175492 | ATP11C     | 0.0000     | -0.2286       | 0.2904        | 0.0000    |
| 1709 | 8175747 | MAGEA3     | 0.0000     | 0.0000        | 0.2904        | 0.0000    |
| 1710 | 8022711 | DSC2       | -0.0261    | 0.0000        | 0.2903        | 0.0000    |
| 1711 | 7892680 | ---        | 0.0000     | 0.2900        | 0.0000        | -0.1476   |
| 1712 | 8137464 | PSPH       | 0.0161     | 0.2576        | 0.0000        | -0.2899   |
| 1713 | 7979179 | ERO1L      | 0.0000     | 0.0000        | -0.2898       | 0.0149    |
| 1714 | 7980309 | C14orf1    | 0.0000     | 0.2898        | 0.0000        | -0.0205   |
| 1715 | 7913824 | C1orf63    | -0.2897    | 0.0000        | 0.0000        | 0.1947    |
| 1716 | 7968972 | COX17      | 0.0000     | 0.2575        | 0.0000        | -0.2896   |
| 1717 | 7965884 | PAH        | -0.2233    | 0.0000        | 0.0000        | 0.2896    |
| 1718 | 7916862 | GPR177     | 0.0000     | 0.0000        | 0.2896        | 0.0000    |
| 1719 | 8139131 | AMPH       | 0.1394     | 0.0000        | 0.0000        | -0.2895   |
| 1720 | 8109697 | CCNG1      | 0.1893     | 0.1465        | -0.0595       | -0.2895   |
| 1721 | 8011462 | C17orf85   | 0.0000     | -0.2892       | 0.0000        | 0.1422    |
| 1722 | 7904036 | CAPZA1     | -0.2891    | 0.0000        | 0.1342        | 0.1149    |
| 1723 | 7977965 | SLC22A17   | 0.0324     | 0.2889        | 0.0000        | -0.2504   |
| 1724 | 8163109 | C9orf4     | 0.0000     | 0.2572        | 0.0000        | -0.2888   |
| 1725 | 7922889 | IVNS1ABP   | -0.0437    | -0.2464       | 0.0000        | 0.2887    |
| 1726 | 7892661 | ---        | 0.0000     | 0.2884        | 0.0000        | 0.0000    |
| 1727 | 8046086 | LASS6      | 0.0233     | 0.0000        | -0.2882       | 0.0000    |
| 1728 | 7952341 | ASAM       | 0.0000     | -0.1000       | 0.0000        | 0.2881    |
| 1729 | 8180266 | ---        | 0.0000     | 0.0000        | -0.1352       | 0.2879    |
| 1730 | 7892919 | ---        | 0.0000     | 0.1943        | 0.0000        | -0.2879   |
| 1731 | 8092067 | RPL22L1    | 0.0654     | 0.0000        | 0.0000        | -0.2875   |
| 1732 | 7898910 | PNRC2      | -0.2875    | 0.0000        | 0.0000        | 0.2166    |
| 1733 | 8179351 | CFB        | -0.1154    | 0.0000        | 0.2873        | 0.0000    |
| 1734 | 8126770 | CYP39A1    | -0.1507    | 0.0000        | 0.2872        | 0.0000    |

| #    | ID      | Name        | SDHB.score | SDHD-AT.score | SDHD-HN.score | VHL.score |
|------|---------|-------------|------------|---------------|---------------|-----------|
| 1735 | 7970569 | SACS        | 0.0134     | 0.0000        | -0.2869       | 0.0000    |
| 1736 | 8088636 | ---         | -0.2171    | -0.1762       | 0.1488        | 0.2868    |
| 1737 | 8118322 | SNORD52     | 0.1201     | 0.0000        | 0.0000        | -0.2865   |
| 1738 | 8117900 | DDR1        | 0.0342     | 0.0000        | -0.2865       | 0.0000    |
| 1739 | 8138310 | DGKB        | 0.0000     | 0.1279        | -0.2861       | 0.0039    |
| 1740 | 7949679 | SPTBN2      | 0.1531     | 0.0000        | -0.2857       | 0.0000    |
| 1741 | 8048763 | KIAA1486    | 0.0000     | 0.0000        | -0.2854       | 0.0323    |
| 1742 | 7896720 | ---         | -0.1881    | 0.0000        | 0.0000        | 0.2854    |
| 1743 | 7982036 | SNORD115-15 | 0.0000     | 0.2853        | 0.0000        | 0.0000    |
| 1744 | 7897520 | ---         | 0.0000     | 0.2852        | 0.0000        | -0.1828   |
| 1745 | 7964183 | GLS2        | 0.1541     | 0.0415        | 0.0000        | -0.2850   |
| 1746 | 8129120 | FAM162B     | 0.0000     | 0.1660        | 0.0000        | -0.2849   |
| 1747 | 7943367 | ---         | 0.0000     | -0.2848       | 0.0166        | 0.0371    |
| 1748 | 7969050 | CYSLTR2     | -0.2807    | 0.0000        | 0.0000        | 0.2848    |
| 1749 | 8093578 | NAT8L       | 0.1398     | 0.0000        | 0.0000        | -0.2847   |
| 1750 | 7989277 | MYO1E       | -0.1264    | -0.1417       | 0.2846        | 0.0617    |
| 1751 | 8063444 | TSHZ2       | -0.1747    | 0.0000        | 0.0000        | 0.2845    |
| 1752 | 7929282 | HHEX        | -0.1144    | 0.0000        | 0.2844        | 0.0000    |
| 1753 | 8037205 | CEACAM1     | 0.0000     | 0.0000        | -0.2844       | 0.2034    |
| 1754 | 7982187 | APBA2       | 0.0093     | 0.0000        | -0.2844       | 0.0000    |
| 1755 | 8114780 | PCDH12      | -0.1853    | -0.0059       | 0.2843        | 0.0807    |
| 1756 | 7936641 | SFXN4       | 0.0000     | 0.0000        | -0.2843       | 0.0000    |
| 1757 | 7977615 | RNASE1      | -0.2842    | 0.0000        | 0.2515        | 0.0862    |
| 1758 | 8104601 | BASP1       | 0.0000     | 0.0000        | -0.2842       | 0.0000    |
| 1759 | 8114006 | ---         | 0.1090     | 0.0000        | -0.2841       | 0.0000    |
| 1760 | 8058765 | FN1         | -0.0609    | -0.1584       | 0.2840        | 0.0000    |
| 1761 | 8006602 | CCL4        | -0.1496    | 0.0000        | 0.2840        | 0.0000    |
| 1762 | 7907911 | CACNA1E     | -0.1721    | 0.0000        | 0.0000        | 0.2839    |
| 1763 | 7980316 | TGFB3       | -0.0833    | 0.0000        | 0.2839        | 0.0000    |
| 1764 | 8007108 | TMEM99      | 0.0956     | 0.1265        | 0.0000        | -0.2837   |
| 1765 | 8107722 | MEGF10      | -0.0858    | 0.0000        | 0.0000        | 0.2835    |
| 1766 | 7946812 | RPS13       | 0.0000     | 0.0000        | 0.0000        | -0.2834   |
| 1767 | 8161418 | GPR116      | -0.2833    | 0.0000        | 0.2824        | 0.1373    |
| 1768 | 8150704 | PXDNL       | 0.0000     | 0.0000        | 0.2832        | 0.0000    |
| 1769 | 7956401 | SHMT2       | 0.0629     | 0.0000        | 0.0000        | -0.2832   |
| 1770 | 7902398 | SNORD45A    | -0.2831    | 0.0000        | 0.0000        | 0.0023    |
| 1771 | 7910915 | CHRM3       | 0.0000     | -0.2831       | 0.0000        | 0.2268    |
| 1772 | 8106776 | COX7C       | 0.0000     | 0.2830        | 0.0000        | -0.2126   |
| 1773 | 7915408 | FOXJ3       | -0.2830    | 0.0000        | 0.0000        | 0.1853    |
| 1774 | 7911989 | RPL22       | 0.0000     | 0.2830        | 0.0000        | 0.0000    |
| 1775 | 8050427 | FAM49A      | -0.2561    | 0.0000        | 0.0000        | 0.2830    |
| 1776 | 8115831 | DUSP1       | -0.2826    | 0.0000        | 0.0000        | 0.2757    |
| 1777 | 8042993 | CTNNA2      | 0.1071     | 0.2824        | -0.0121       | -0.2676   |
| 1778 | 7946589 | MRVI1       | -0.1140    | -0.0137       | 0.2823        | 0.0000    |
| 1779 | 7907680 | FAM20B      | 0.1945     | 0.0000        | -0.2823       | 0.0000    |
| 1780 | 8101881 | ADH1B       | -0.2822    | 0.0000        | 0.1366        | 0.1465    |
| 1781 | 7943827 | DLAT        | 0.2821     | 0.0000        | 0.0000        | -0.1226   |
| 1782 | 7919984 | SELENBP1    | -0.1174    | 0.0000        | 0.2821        | 0.0000    |
| 1783 | 7950810 | SYTL2       | -0.0413    | -0.0657       | 0.2820        | 0.0000    |
| 1784 | 8175121 | IGSF1       | 0.0000     | 0.2414        | -0.2820       | 0.0000    |
| 1785 | 7929388 | PLCE1       | -0.2374    | 0.0000        | 0.2820        | 0.0999    |
| 1786 | 7982054 | HBII-52-24  | 0.0000     | 0.2819        | 0.0000        | 0.0000    |
| 1787 | 8056408 | GALNT3      | -0.1294    | 0.0000        | 0.0000        | 0.2817    |
| 1788 | 7953564 | C12orf57    | 0.0000     | 0.2817        | 0.0000        | -0.0581   |
| 1789 | 7955469 | SLC4A8      | 0.0000     | 0.0000        | -0.2816       | 0.0000    |
| 1790 | 7976350 | KIAA1409    | 0.0917     | 0.0000        | -0.2815       | 0.0000    |
| 1791 | 8132439 | C7orf10     | 0.0094     | 0.0000        | 0.0000        | -0.2814   |
| 1792 | 7926443 | ---         | -0.2814    | 0.0000        | 0.0000        | 0.2365    |
| 1793 | 7894720 | ---         | -0.2814    | 0.0000        | 0.0000        | 0.2703    |
| 1794 | 8048639 | INHA        | 0.0000     | 0.0000        | -0.2813       | 0.0000    |
| 1795 | 8097098 | USP53       | -0.2812    | 0.0000        | 0.2385        | 0.1056    |
| 1796 | 8042439 | ANTXR1      | -0.0267    | -0.0531       | 0.2812        | 0.0000    |

| #    | ID      | Name       | SDHB.score | SDHD-AT.score | SDHD-HN.score | VHL.score |
|------|---------|------------|------------|---------------|---------------|-----------|
| 1797 | 8095341 | ---        | 0.0000     | 0.0000        | 0.2810        | 0.0000    |
| 1798 | 8067825 | NCRNA00164 | 0.0000     | 0.2809        | 0.0000        | 0.0000    |
| 1799 | 8162777 | GABBR2     | 0.0000     | 0.0000        | -0.2808       | 0.1640    |
| 1800 | 7984405 | C15orf61   | 0.0416     | 0.1787        | 0.0000        | -0.2806   |
| 1801 | 8147766 | FZD6       | 0.0244     | 0.0000        | 0.0000        | -0.2806   |
| 1802 | 8098439 | EPCAM      | 0.0000     | 0.0000        | -0.2805       | 0.1189    |
| 1803 | 8099834 | TLR1       | -0.0049    | 0.0000        | 0.2805        | 0.0000    |
| 1804 | 8042335 | VDAC2      | 0.0790     | 0.1069        | 0.0000        | -0.2804   |
| 1805 | 8023710 | CDH19      | -0.2803    | 0.0000        | 0.2558        | 0.1750    |
| 1806 | 7951351 | PDGFD      | -0.2803    | 0.0000        | 0.2728        | 0.2154    |
| 1807 | 8180195 | ---        | -0.1617    | 0.0000        | 0.2800        | 0.0000    |
| 1808 | 8089795 | COX17      | 0.0000     | 0.2447        | 0.0000        | -0.2799   |
| 1809 | 8085999 | CMTM6      | -0.0206    | 0.0000        | 0.2799        | 0.0000    |
| 1810 | 8093037 | ---        | 0.0000     | 0.2798        | 0.0000        | 0.0000    |
| 1811 | 8138487 | ---        | -0.0850    | 0.0000        | 0.2796        | 0.0000    |
| 1812 | 8042830 | MTHFD2     | 0.0000     | 0.0000        | 0.0000        | -0.2794   |
| 1813 | 8094778 | UCHL1      | 0.0407     | 0.0000        | 0.0000        | -0.2790   |
| 1814 | 8137257 | GIMAP5     | -0.2582    | 0.0000        | 0.2788        | 0.0708    |
| 1815 | 8069689 | ADAMTS5    | 0.0000     | 0.0000        | 0.2788        | 0.0000    |
| 1816 | 8102950 | INPP4B     | -0.2788    | 0.0000        | 0.2703        | 0.1565    |
| 1817 | 8167603 | CLCN5      | 0.0000     | 0.0000        | -0.2785       | 0.0000    |
| 1818 | 7918474 | DRAM2      | -0.2348    | 0.0000        | 0.2784        | 0.0000    |
| 1819 | 7903404 | RNPC3      | -0.2784    | 0.1723        | 0.1270        | 0.0000    |
| 1820 | 8028194 | ZNF382     | 0.0389     | 0.0000        | -0.2783       | 0.0000    |
| 1821 | 7943103 | CCDC67     | 0.0000     | 0.0000        | 0.0000        | 0.2783    |
| 1822 | 7912473 | FBXO2      | 0.0000     | 0.0601        | 0.2782        | -0.2220   |
| 1823 | 7895684 | ---        | 0.0000     | 0.0000        | 0.0000        | 0.2781    |
| 1824 | 8173299 | EDA2R      | 0.2780     | 0.0000        | -0.0200       | -0.2175   |
| 1825 | 8014063 | EVI2B      | -0.1480    | 0.0000        | 0.2780        | 0.0000    |
| 1826 | 7949904 | UNC93B1    | -0.0447    | 0.0000        | 0.2779        | 0.0000    |
| 1827 | 7944510 | RNF26      | 0.1989     | 0.0000        | 0.0000        | -0.2778   |
| 1828 | 7918008 | DBT        | -0.2777    | 0.0000        | 0.0000        | 0.0201    |
| 1829 | 8096415 | MMRN1      | 0.0000     | 0.0000        | 0.2777        | 0.0000    |
| 1830 | 8024712 | ATCAY      | 0.1095     | 0.2009        | 0.0000        | -0.2777   |
| 1831 | 7932069 | NUDT5      | 0.0252     | 0.0000        | 0.0000        | -0.2776   |
| 1832 | 8120501 | COL19A1    | 0.0000     | 0.0000        | 0.2774        | 0.0000    |
| 1833 | 7894328 | ---        | 0.1269     | -0.2774       | 0.0000        | 0.0000    |
| 1834 | 7955184 | PRPH       | 0.0000     | -0.2774       | 0.0956        | 0.0000    |
| 1835 | 8087100 | UQCRC1     | 0.0538     | 0.0000        | 0.0000        | -0.2769   |
| 1836 | 7923978 | CD34       | -0.2768    | 0.0000        | 0.1867        | 0.1925    |
| 1837 | 8080938 | MITF       | 0.0000     | 0.0000        | 0.2768        | 0.0000    |
| 1838 | 7943605 | ACAT1      | 0.2587     | 0.0000        | 0.0000        | -0.2768   |
| 1839 | 8040587 | EFR3B      | 0.1208     | 0.0000        | 0.0000        | -0.2766   |
| 1840 | 8038899 | FPR1       | -0.1952    | 0.0000        | 0.2766        | 0.0000    |
| 1841 | 7955142 | CACNB3     | 0.0915     | 0.0000        | 0.0000        | -0.2766   |
| 1842 | 7914235 | SFRS4      | -0.2766    | 0.0000        | 0.0049        | 0.2092    |
| 1843 | 8025183 | MCOLN1     | 0.0000     | 0.2765        | 0.0000        | -0.0895   |
| 1844 | 8081657 | CD200      | -0.1212    | 0.0000        | 0.2765        | 0.0000    |
| 1845 | 7952884 | B3GAT1     | 0.0328     | 0.0000        | -0.2764       | 0.0000    |
| 1846 | 8161904 | ---        | -0.1138    | 0.2764        | -0.1156       | 0.1501    |
| 1847 | 8143247 | KIAA1549   | 0.1686     | 0.0000        | -0.2764       | 0.0000    |
| 1848 | 7983239 | CKMT1A     | 0.1712     | 0.1344        | -0.0313       | -0.2763   |
| 1849 | 8169598 | ZCCHC12    | 0.0007     | 0.2761        | -0.1239       | -0.0486   |
| 1850 | 8125139 | NEU1       | 0.0488     | 0.0922        | 0.0000        | -0.2759   |
| 1851 | 8175393 | ARHGEF6    | -0.2338    | 0.0000        | 0.0000        | 0.2757    |
| 1852 | 8117288 | SCGN       | 0.0000     | 0.0000        | 0.0000        | -0.2757   |
| 1853 | 8157092 | TMEM38B    | 0.1528     | 0.0942        | 0.0000        | -0.2756   |
| 1854 | 8113097 | C5orf36    | -0.2198    | 0.0000        | 0.0000        | 0.2756    |
| 1855 | 8063337 | C20orf199  | 0.0855     | 0.1502        | 0.0000        | -0.2756   |
| 1856 | 8180252 | ---        | 0.0000     | 0.0000        | 0.0000        | 0.2756    |
| 1857 | 8117696 | COX11      | 0.0000     | 0.1276        | 0.0000        | -0.2755   |
| 1858 | 8179935 | TNXB       | -0.0619    | 0.0000        | 0.2753        | 0.0000    |

| #    | ID      | Name     | SDHB.score | SDHD-AT.score | SDHD-HN.score | VHL.score |
|------|---------|----------|------------|---------------|---------------|-----------|
| 1859 | 7959087 | KIAA1853 | 0.0104     | 0.0906        | -0.2752       | 0.0000    |
| 1860 | 7928752 | GHITM    | 0.0219     | 0.0121        | 0.0000        | -0.2752   |
| 1861 | 8008885 | ---      | -0.2752    | 0.0000        | 0.0928        | 0.2090    |
| 1862 | 7991335 | ANPEP    | -0.0680    | 0.0000        | 0.2749        | 0.0000    |
| 1863 | 8057898 | HECW2    | -0.1971    | 0.0000        | 0.2746        | 0.0292    |
| 1864 | 8012961 | NCOR1    | 0.0000     | -0.2746       | 0.0000        | 0.0000    |
| 1865 | 8013833 | SEZ6     | 0.2745     | 0.0000        | -0.0254       | -0.1966   |
| 1866 | 8141150 | ASNS     | 0.0000     | 0.0292        | 0.0000        | -0.2745   |
| 1867 | 8058670 | IKZF2    | -0.2744    | 0.0000        | 0.1323        | 0.0906    |
| 1868 | 8019737 | KPNA2    | 0.1794     | 0.0000        | 0.0000        | -0.2743   |
| 1869 | 8029006 | AXL      | -0.2069    | -0.1713       | 0.2742        | 0.1933    |
| 1870 | 8133818 | PHTF2    | 0.2742     | 0.0000        | 0.0000        | -0.1522   |
| 1871 | 7917912 | DPYD     | -0.2740    | 0.0000        | 0.1039        | 0.0661    |
| 1872 | 7992463 | SLC9A3R2 | -0.0742    | 0.0000        | 0.2737        | 0.0000    |
| 1873 | 7910600 | KIAA1804 | 0.0667     | 0.1770        | 0.0000        | -0.2736   |
| 1874 | 8164008 | C9orf45  | 0.0000     | 0.2736        | 0.0000        | -0.2584   |
| 1875 | 8034843 | NDUFB7   | 0.0000     | 0.2736        | 0.0000        | -0.1497   |
| 1876 | 8026971 | IFI30    | 0.0000     | -0.0600       | 0.2735        | 0.0000    |
| 1877 | 8021668 | CDH7     | 0.1864     | 0.2454        | -0.1535       | -0.2734   |
| 1878 | 8012270 | ---      | 0.0366     | -0.2733       | 0.0000        | 0.0000    |
| 1879 | 7895615 | ---      | 0.0713     | 0.0000        | 0.0000        | -0.2731   |
| 1880 | 8098263 | PALLD    | 0.0000     | 0.0000        | 0.2727        | 0.0000    |
| 1881 | 7894154 | ---      | 0.0000     | -0.2727       | 0.0000        | 0.0000    |
| 1882 | 8031097 | NDUFA3   | 0.0000     | 0.2725        | 0.0000        | -0.1514   |
| 1883 | 8068401 | CBR1     | 0.0000     | 0.0000        | 0.2723        | -0.1008   |
| 1884 | 8009417 | KPNA2    | 0.1832     | 0.0000        | 0.0000        | -0.2723   |
| 1885 | 8035553 | COPE     | 0.0000     | 0.2722        | 0.0000        | -0.1297   |
| 1886 | 7963986 | RAB13    | 0.0000     | 0.0000        | 0.2720        | 0.0000    |
| 1887 | 7901376 | RNF11    | -0.1390    | 0.2720        | 0.0000        | 0.0000    |
| 1888 | 8166493 | EIF2S3   | 0.0993     | 0.0000        | 0.0000        | -0.2720   |
| 1889 | 7901634 | C1orf175 | 0.0000     | 0.0000        | -0.2719       | 0.0000    |
| 1890 | 8164252 | SH2D3C   | -0.0630    | 0.0000        | 0.2717        | 0.0000    |
| 1891 | 8092277 | PEX5L    | 0.0359     | 0.0000        | 0.0000        | -0.2716   |
| 1892 | 7967107 | C12orf27 | 0.0000     | 0.0000        | 0.0000        | 0.2716    |
| 1893 | 8016311 | WNT3     | 0.0000     | 0.0000        | -0.0379       | 0.2714    |
| 1894 | 7934690 | ZCCHC24  | 0.0000     | 0.0000        | 0.2714        | 0.0000    |
| 1895 | 8026300 | CD97     | -0.1780    | -0.0696       | 0.2713        | 0.1081    |
| 1896 | 8110417 | FAM153C  | -0.0396    | 0.0000        | 0.0000        | 0.2713    |
| 1897 | 8077458 | EDEM1    | 0.0000     | 0.0000        | 0.0000        | -0.2712   |
| 1898 | 8086008 | DYNC1LI1 | 0.0000     | 0.0000        | 0.0000        | -0.2711   |
| 1899 | 7920912 | UBQLN4   | 0.0427     | 0.0000        | 0.0000        | -0.2711   |
| 1900 | 8158684 | ---      | -0.1810    | -0.1493       | 0.2710        | 0.1493    |
| 1901 | 8156126 | RMI1     | 0.0000     | 0.0000        | -0.2708       | 0.0000    |
| 1902 | 7894974 | ---      | 0.0000     | 0.2706        | 0.0000        | 0.0000    |
| 1903 | 7896621 | ---      | 0.1130     | 0.0000        | 0.0000        | -0.2705   |
| 1904 | 7913216 | PLA2G2A  | 0.0000     | 0.0000        | 0.2705        | 0.0000    |
| 1905 | 8071020 | C21orf58 | 0.0000     | 0.0000        | 0.2704        | 0.0000    |
| 1906 | 8059650 | SP110    | 0.0000     | -0.2704       | 0.0000        | 0.0529    |
| 1907 | 8113356 | GPAM     | 0.0000     | 0.2703        | 0.0000        | -0.0314   |
| 1908 | 8138542 | IL6      | -0.2702    | 0.0000        | 0.0494        | 0.2399    |
| 1909 | 7892894 | ---      | -0.2700    | 0.1111        | 0.0000        | 0.0368    |
| 1910 | 7895171 | ---      | 0.0000     | -0.2700       | 0.0000        | 0.0000    |
| 1911 | 8104394 | ADCY2    | 0.0000     | 0.0121        | -0.2699       | 0.0658    |
| 1912 | 8162531 | ---      | -0.1297    | 0.0000        | 0.0000        | 0.2697    |
| 1913 | 8084880 | HES1     | -0.2697    | 0.0000        | 0.0000        | 0.2202    |
| 1914 | 7981481 | C14orf2  | 0.0000     | 0.2697        | 0.0000        | 0.0000    |
| 1915 | 8066266 | MAFB     | -0.0015    | -0.0116       | 0.2696        | 0.0000    |
| 1916 | 8122637 | SASH1    | -0.2044    | -0.0355       | 0.2696        | 0.1300    |
| 1917 | 7894442 | ---      | 0.1904     | -0.0656       | -0.2696       | 0.0000    |
| 1918 | 7914580 | FNDC5    | 0.0000     | 0.2695        | 0.0000        | 0.0000    |
| 1919 | 8067295 | SLMO2    | 0.0000     | -0.2334       | 0.0000        | 0.2694    |
| 1920 | 8164013 | STRBP    | 0.0000     | 0.2462        | 0.0000        | -0.2693   |

| #    | ID      | Name       | SDHB.score | SDHD-AT.score | SDHD-HN.score | VHL.score |
|------|---------|------------|------------|---------------|---------------|-----------|
| 1921 | 7993624 | SYT17      | 0.0000     | 0.0000        | -0.2691       | 0.0000    |
| 1922 | 7972217 | SPRY2      | -0.2260    | 0.0000        | 0.0263        | 0.2686    |
| 1923 | 8107998 | UQCRQ      | 0.0000     | 0.2686        | 0.0000        | 0.0000    |
| 1924 | 7981320 | ---        | 0.0000     | 0.0000        | -0.2685       | 0.1131    |
| 1925 | 7917612 | HFM1       | -0.1572    | 0.2685        | 0.0000        | 0.0016    |
| 1926 | 7952805 | LOC283174  | 0.1789     | -0.0702       | -0.2685       | 0.0000    |
| 1927 | 8179184 | DDR1       | 0.0193     | 0.0000        | -0.2683       | 0.0000    |
| 1928 | 8102065 | BDH2       | 0.0000     | 0.0000        | 0.2683        | 0.0000    |
| 1929 | 8123467 | C6orf70    | -0.0443    | 0.0000        | 0.0000        | 0.2683    |
| 1930 | 8165905 | ---        | 0.0000     | 0.2682        | 0.0000        | -0.0001   |
| 1931 | 7930320 | CCDC147    | -0.0094    | 0.0000        | 0.0000        | 0.2682    |
| 1932 | 8110090 | SFXN1      | 0.0000     | 0.0000        | -0.2682       | 0.0000    |
| 1933 | 8151223 | SLCO5A1    | 0.0430     | 0.0000        | -0.2681       | 0.0000    |
| 1934 | 8066925 | PTGIS      | 0.0000     | 0.0000        | 0.2681        | 0.0000    |
| 1935 | 8063156 | CD40       | -0.0655    | -0.0891       | 0.2681        | 0.0000    |
| 1936 | 8115196 | ZNF300     | 0.2671     | 0.0000        | 0.0000        | -0.2678   |
| 1937 | 8157281 | ---        | 0.1348     | 0.0000        | -0.2677       | 0.0000    |
| 1938 | 7902400 | SNORD45B   | -0.2677    | 0.0782        | 0.0000        | 0.0000    |
| 1939 | 8126394 | MRPS10     | 0.0047     | 0.0000        | 0.0000        | -0.2677   |
| 1940 | 8162254 | DIRAS2     | 0.0000     | 0.0000        | -0.2676       | 0.0000    |
| 1941 | 7915130 | SF3A3      | -0.2675    | 0.0000        | 0.0000        | 0.0585    |
| 1942 | 8129037 | ---        | 0.0000     | -0.1295       | 0.2675        | 0.0000    |
| 1943 | 7897801 | RNU5E      | -0.2675    | 0.0000        | 0.0000        | 0.0295    |
| 1944 | 8111998 | HCN1       | 0.0000     | 0.0000        | -0.2674       | 0.1066    |
| 1945 | 8139433 | MYO1G      | -0.0016    | 0.0000        | 0.2674        | 0.0000    |
| 1946 | 7895425 | ---        | 0.0000     | 0.0000        | 0.0000        | 0.2674    |
| 1947 | 8013268 | FAM106A    | 0.0000     | -0.2674       | 0.0000        | 0.0000    |
| 1948 | 8037387 | ---        | -0.2673    | 0.0000        | 0.1460        | 0.1700    |
| 1949 | 8014768 | PLXDC1     | -0.0886    | 0.0000        | 0.2672        | 0.0000    |
| 1950 | 8157101 | ---        | 0.0000     | 0.0000        | 0.0000        | 0.2671    |
| 1951 | 7974870 | SNAPC1     | 0.0000     | 0.0000        | -0.0606       | 0.2670    |
| 1952 | 8140319 | HIP1       | -0.0945    | -0.0282       | 0.2667        | 0.0000    |
| 1953 | 8085628 | ANKRD28    | 0.0000     | 0.0000        | 0.2667        | 0.0000    |
| 1954 | 8166355 | CNKSR2     | 0.1718     | 0.2667        | -0.1489       | -0.2658   |
| 1955 | 8078962 | EIF1B      | 0.0000     | 0.0000        | 0.0550        | -0.2666   |
| 1956 | 7903457 | PRMT6      | 0.0000     | 0.2666        | 0.0000        | 0.0000    |
| 1957 | 8100547 | ---        | -0.2665    | -0.0908       | 0.2304        | 0.2656    |
| 1958 | 8125443 | ---        | 0.0000     | 0.2664        | 0.0000        | 0.0000    |
| 1959 | 7956220 | OBFC2B     | 0.0379     | 0.0000        | 0.0000        | -0.2664   |
| 1960 | 7918223 | C1orf59    | -0.2369    | 0.0000        | 0.0000        | 0.2663    |
| 1961 | 7959834 | GLT1D1     | 0.0000     | 0.2662        | 0.0000        | 0.0000    |
| 1962 | 7916669 | DOCK7      | -0.2506    | 0.0000        | 0.0000        | 0.2662    |
| 1963 | 7990191 | BRUNOL6    | 0.0939     | 0.0000        | 0.0000        | -0.2660   |
| 1964 | 7996264 | CDH5       | -0.1839    | 0.0000        | 0.2659        | 0.0757    |
| 1965 | 7976810 | SNORD113-3 | 0.0000     | 0.0000        | -0.2656       | 0.2589    |
| 1966 | 7952768 | SNX19      | 0.2656     | 0.0000        | 0.0000        | -0.0168   |
| 1967 | 7906810 | DUSP12     | 0.1662     | 0.0000        | 0.0000        | -0.2651   |
| 1968 | 8143127 | FAM180A    | 0.0000     | -0.0576       | 0.2651        | 0.0000    |
| 1969 | 8137517 | HTR5A      | 0.0000     | 0.0000        | 0.0000        | 0.2651    |
| 1970 | 8141076 | PON2       | 0.0000     | 0.0000        | -0.1936       | 0.2650    |
| 1971 | 7947681 | ARHGAP1    | -0.0242    | 0.0000        | 0.2647        | 0.0000    |
| 1972 | 8121547 | C6orf225   | 0.0752     | 0.0220        | 0.0000        | -0.2646   |
| 1973 | 8124492 | HIST1H2BK  | -0.2322    | 0.0000        | 0.0000        | 0.2645    |
| 1974 | 8128371 | C6orf168   | 0.2644     | 0.0000        | -0.1688       | -0.1727   |
| 1975 | 7893432 | ---        | 0.0000     | -0.2644       | 0.0000        | 0.0000    |
| 1976 | 8117170 | ---        | 0.0000     | 0.0000        | 0.2643        | 0.0000    |
| 1977 | 8064978 | JAG1       | -0.1753    | -0.0867       | 0.0245        | 0.2642    |
| 1978 | 7953130 | C12orf32   | 0.1165     | 0.0000        | 0.0000        | -0.2641   |
| 1979 | 7894704 | ---        | 0.0000     | 0.2641        | 0.0000        | -0.1390   |
| 1980 | 8075483 | PIK3IP1    | 0.0000     | 0.2641        | 0.0000        | 0.0000    |
| 1981 | 8173933 | PCDH19     | 0.0000     | 0.2641        | 0.0425        | -0.1207   |
| 1982 | 7919749 | ---        | -0.0425    | 0.0000        | 0.2641        | 0.0000    |



| #    | ID      | Name     | SDHB.score | SDHD-AT.score | SDHD-HN.score | VHL.score |
|------|---------|----------|------------|---------------|---------------|-----------|
| 1983 | 8156770 | GALNT12  | -0.1287    | -0.0429       | 0.0000        | 0.2639    |
| 1984 | 8171313 | ARHGAP6  | -0.1529    | 0.0000        | 0.2638        | 0.0051    |
| 1985 | 8133233 | AUTS2    | 0.1925     | -0.0285       | -0.2638       | 0.0000    |
| 1986 | 8016463 | HOXB6    | 0.0000     | 0.0000        | -0.2637       | 0.0000    |
| 1987 | 7895096 | ---      | 0.0517     | 0.1781        | 0.0000        | -0.2635   |
| 1988 | 7911178 | NLRP3    | -0.1726    | 0.0000        | 0.2635        | 0.0000    |
| 1989 | 8097586 | GAB1     | -0.1061    | 0.0000        | 0.2634        | 0.0000    |
| 1990 | 8160879 | CCL19    | -0.0301    | 0.0000        | 0.2631        | 0.0000    |
| 1991 | 7898300 | CLCNKA   | -0.0131    | 0.0000        | 0.0000        | 0.2631    |
| 1992 | 8171359 | GPM6B    | -0.2630    | 0.0000        | 0.1660        | 0.1069    |
| 1993 | 7971208 | KBTBD6   | 0.0000     | 0.2629        | 0.0000        | 0.0000    |
| 1994 | 7946340 | RIC3     | 0.1731     | 0.0000        | -0.2628       | -0.0099   |
| 1995 | 8027040 | TMEM59L  | 0.0081     | 0.2627        | 0.0000        | -0.2434   |
| 1996 | 8044094 | TMEM182  | 0.0079     | 0.0000        | 0.0000        | -0.2626   |
| 1997 | 7895547 | ---      | 0.0922     | 0.0000        | -0.2626       | 0.0000    |
| 1998 | 7979133 | NID2     | -0.0397    | -0.2246       | 0.2625        | 0.0000    |
| 1999 | 7897675 | ANGPTL7  | -0.2496    | 0.0000        | 0.2625        | 0.0261    |
| 2000 | 7894076 | ---      | -0.1157    | 0.2623        | 0.0000        | 0.0000    |
| 2001 | 7964834 | CPM      | -0.2606    | 0.0000        | 0.1316        | 0.2622    |
| 2002 | 8137252 | GIMAP1   | -0.0778    | 0.0000        | 0.2622        | 0.0000    |
| 2003 | 7917088 | PIGK     | -0.1745    | 0.2621        | 0.0000        | 0.0000    |
| 2004 | 8064790 | RASSF2   | -0.1606    | -0.2620       | 0.1681        | 0.2363    |
| 2005 | 7916843 | GNG12    | -0.2619    | 0.0000        | 0.1780        | 0.1798    |
| 2006 | 7945014 | CHEK1    | 0.2619     | 0.0000        | 0.0000        | -0.1337   |
| 2007 | 7917103 | ZZZ3     | -0.2617    | 0.0733        | 0.0000        | 0.0611    |
| 2008 | 7987230 | LPCAT4   | 0.0000     | 0.0000        | 0.0000        | -0.2617   |
| 2009 | 7917790 | ---      | -0.1106    | 0.0000        | 0.0000        | 0.2617    |
| 2010 | 7973629 | REC8     | 0.0000     | 0.0000        | -0.2616       | 0.0000    |
| 2011 | 8083749 | PPM1L    | 0.0000     | 0.0000        | 0.2616        | -0.1618   |
| 2012 | 7933537 | OGDHL    | 0.1431     | 0.2615        | -0.1888       | -0.1992   |
| 2013 | 7893171 | ---      | 0.0000     | -0.2614       | 0.0000        | 0.0000    |
| 2014 | 8145685 | ---      | -0.1232    | -0.2614       | 0.1539        | 0.1929    |
| 2015 | 7985522 | ADAMTSL3 | -0.1831    | -0.0003       | 0.0000        | 0.2614    |
| 2016 | 7909285 | PFKFB2   | 0.1875     | 0.0000        | 0.0000        | -0.2614   |
| 2017 | 7894809 | ---      | 0.0000     | -0.2611       | 0.0000        | 0.0000    |
| 2018 | 7893850 | ---      | 0.0009     | 0.0000        | 0.0000        | -0.2610   |
| 2019 | 8076962 | MAPK12   | 0.0484     | 0.0000        | 0.0000        | -0.2609   |
| 2020 | 7987475 | PLCB2    | -0.2037    | 0.0000        | 0.2609        | 0.0702    |
| 2021 | 8039947 | FUSIP1   | -0.2608    | 0.0000        | 0.0727        | 0.0610    |
| 2022 | 7974461 | LGALS3   | 0.0000     | -0.1495       | 0.2607        | 0.0000    |
| 2023 | 8003875 | SPNS2    | -0.0581    | 0.0000        | 0.2604        | 0.0000    |
| 2024 | 8099393 | ---      | 0.0000     | 0.0000        | 0.2604        | 0.0000    |
| 2025 | 7939767 | MADD     | 0.0143     | 0.0000        | -0.2603       | 0.0000    |
| 2026 | 7898263 | FBLIM1   | 0.0000     | -0.0434       | 0.2602        | 0.0000    |
| 2027 | 7932530 | PIP4K2A  | -0.1126    | -0.1078       | 0.2601        | 0.0420    |
| 2028 | 7964522 | CDK4     | 0.0435     | 0.1250        | 0.0000        | -0.2601   |
| 2029 | 8108127 | CAMLG    | 0.0804     | 0.0571        | 0.0000        | -0.2600   |
| 2030 | 7981273 | CCDC85C  | 0.1449     | 0.0793        | -0.2599       | -0.0737   |
| 2031 | 7985999 | ---      | 0.2594     | 0.0000        | -0.2330       | -0.1321   |
| 2032 | 8058857 | IGFBP5   | -0.2590    | 0.0000        | 0.1872        | 0.1240    |
| 2033 | 7941148 | TM7SF2   | 0.1359     | 0.0000        | -0.2590       | 0.0000    |
| 2034 | 7898161 | EFHD2    | -0.1635    | 0.0000        | 0.0000        | 0.2589    |
| 2035 | 8099685 | LGI2     | -0.1689    | -0.1183       | 0.2589        | 0.1257    |
| 2036 | 7965627 | LTA4H    | 0.0000     | 0.2589        | 0.0000        | -0.0047   |
| 2037 | 8160138 | NFIB     | -0.1852    | 0.0000        | 0.2589        | 0.0812    |
| 2038 | 7895037 | ---      | 0.0000     | -0.2588       | 0.0000        | 0.0000    |
| 2039 | 7951397 | CASP1    | -0.2016    | 0.0000        | 0.2585        | 0.0558    |
| 2040 | 7914791 | SFPQ     | -0.1446    | 0.0000        | 0.0000        | 0.2585    |
| 2041 | 7916836 | SERBP1   | -0.2584    | 0.0000        | 0.0091        | 0.0397    |
| 2042 | 7970241 | F10      | 0.0000     | 0.2583        | -0.1166       | 0.0000    |
| 2043 | 7901447 | PRPF38A  | -0.2583    | 0.0000        | 0.0000        | 0.1980    |
| 2044 | 8123819 | EEF1E1   | 0.0000     | 0.1379        | 0.0000        | -0.2581   |

| #    | ID      | Name      | SDHB.score | SDHD-AT.score | SDHD-HN.score | VHL.score |
|------|---------|-----------|------------|---------------|---------------|-----------|
| 2045 | 8118667 | ---       | -0.1119    | 0.0000        | 0.2581        | 0.0000    |
| 2046 | 8026724 | MRPL34    | 0.0000     | 0.2580        | 0.0000        | -0.1723   |
| 2047 | 8132819 | IKZF1     | 0.0000     | 0.0000        | 0.2578        | 0.0000    |
| 2048 | 7894548 | ---       | 0.0251     | -0.2578       | 0.0000        | 0.0000    |
| 2049 | 7900228 | NDUFS5    | -0.1231    | 0.2578        | 0.0000        | 0.0000    |
| 2050 | 7899484 | ---       | -0.2576    | 0.0000        | 0.1924        | 0.0000    |
| 2051 | 8043484 | ---       | 0.0000     | 0.0000        | 0.2575        | 0.0000    |
| 2052 | 8104663 | CDH6      | -0.0926    | 0.0000        | 0.2575        | 0.0000    |
| 2053 | 8095870 | CCNG2     | -0.0137    | 0.0000        | 0.0000        | 0.2574    |
| 2054 | 7941927 | AIP       | 0.1648     | 0.0000        | 0.0000        | -0.2573   |
| 2055 | 8157300 | BSPRY     | 0.0000     | 0.0000        | 0.0000        | 0.2573    |
| 2056 | 8120983 | HTR1E     | 0.0000     | 0.2569        | -0.0612       | -0.0645   |
| 2057 | 7982868 | CHAC1     | 0.0000     | 0.2026        | 0.0000        | -0.2569   |
| 2058 | 8040419 | MYCN      | 0.0000     | 0.0000        | -0.2569       | 0.0503    |
| 2059 | 7961569 | ---       | -0.1245    | 0.0000        | 0.2568        | 0.0023    |
| 2060 | 7914809 | KIAA0319L | -0.2070    | 0.1860        | -0.0112       | 0.2566    |
| 2061 | 7894002 | ---       | 0.0000     | 0.0000        | 0.0000        | -0.2565   |
| 2062 | 8005679 | CCDC144C  | 0.0000     | -0.2565       | 0.0000        | 0.0000    |
| 2063 | 7987012 | CHRFAM7A  | 0.1418     | 0.0000        | 0.0000        | -0.2564   |
| 2064 | 8121095 | ANKRD6    | 0.0000     | 0.0000        | 0.0000        | -0.2564   |
| 2065 | 8159142 | COL5A1    | 0.0000     | -0.1105       | 0.2564        | 0.0000    |
| 2066 | 8007462 | NBR2      | 0.0513     | 0.0000        | 0.0000        | -0.2563   |
| 2067 | 7905606 | NPR1      | -0.0610    | 0.0000        | 0.2563        | 0.0000    |
| 2068 | 7957673 | C12orf55  | -0.2427    | -0.0169       | 0.1366        | 0.2562    |
| 2069 | 7972936 | FAM70B    | -0.0439    | 0.0000        | 0.2562        | 0.0000    |
| 2070 | 7970763 | FLT1      | -0.2492    | 0.0000        | 0.0978        | 0.2561    |
| 2071 | 8099633 | PPARGC1A  | 0.2037     | 0.0000        | -0.2561       | -0.0349   |
| 2072 | 8050302 | ROCK2     | -0.0916    | -0.1400       | 0.2560        | 0.0304    |
| 2073 | 7942135 | ANO1      | -0.1491    | 0.0000        | 0.2558        | 0.0000    |
| 2074 | 7896439 | ---       | -0.1449    | 0.2557        | 0.0000        | 0.0000    |
| 2075 | 7961111 | CLEC1A    | -0.2556    | 0.0000        | 0.0526        | 0.2304    |
| 2076 | 7909545 | TRAF5     | 0.0357     | -0.2556       | 0.0886        | -0.0349   |
| 2077 | 7949577 | YIF1A     | 0.2427     | 0.0000        | 0.0000        | -0.2555   |
| 2078 | 7902822 | PKN2      | -0.2554    | 0.0000        | 0.0000        | 0.1258    |
| 2079 | 8122099 | ENPP1     | 0.1106     | 0.0000        | 0.0000        | -0.2553   |
| 2080 | 7896263 | ---       | -0.2384    | 0.0000        | 0.0810        | 0.2553    |
| 2081 | 7913858 | PAQR7     | -0.2552    | 0.0000        | 0.0000        | 0.2100    |
| 2082 | 8176219 | MTCP1     | 0.0000     | 0.0000        | 0.0000        | 0.2552    |
| 2083 | 8169473 | PLS3      | -0.0146    | 0.0000        | 0.2551        | 0.0000    |
| 2084 | 8144917 | LPL       | 0.0000     | -0.0699       | 0.2550        | 0.0000    |
| 2085 | 7894199 | ---       | 0.2549     | -0.2150       | 0.0000        | 0.0000    |
| 2086 | 7896702 | ---       | -0.1522    | 0.0000        | 0.0000        | 0.2549    |
| 2087 | 7959986 | PUS1      | 0.0000     | -0.0628       | 0.0000        | 0.2549    |
| 2088 | 7896728 | ---       | -0.0341    | 0.0000        | 0.2548        | 0.0000    |
| 2089 | 7924309 | ESRRG     | 0.0000     | 0.0000        | -0.2548       | 0.0000    |
| 2090 | 7979085 | PYGL      | -0.2548    | 0.0000        | 0.2184        | 0.1626    |
| 2091 | 7900597 | C1orf50   | -0.0977    | 0.2547        | 0.0000        | 0.0000    |
| 2092 | 8038587 | SYT3      | 0.0000     | 0.2546        | 0.0000        | -0.1322   |
| 2093 | 8033605 | MYO1F     | -0.1372    | 0.0000        | 0.2546        | 0.0000    |
| 2094 | 8150509 | PLAT      | -0.2545    | 0.0000        | 0.0731        | 0.1688    |
| 2095 | 7894562 | ---       | -0.1582    | 0.2545        | 0.0000        | 0.0000    |
| 2096 | 7936937 | UROS      | 0.0000     | 0.0000        | 0.0000        | -0.2544   |
| 2097 | 8019357 | DCXR      | 0.1325     | 0.0465        | 0.0000        | -0.2543   |
| 2098 | 7898736 | HSPC157   | -0.0412    | 0.2542        | 0.0000        | 0.0000    |
| 2099 | 8138602 | DFNA5     | 0.0429     | 0.2542        | 0.0000        | -0.2191   |
| 2100 | 7993453 | MPV17L    | 0.0243     | 0.0000        | -0.2542       | 0.0000    |
| 2101 | 7995362 | GPT2      | 0.0000     | 0.0000        | 0.0000        | -0.2542   |
| 2102 | 7985016 | SNX33     | -0.1975    | -0.0639       | 0.2542        | 0.1430    |
| 2103 | 8016414 | SKAP1     | -0.1128    | 0.0000        | 0.0000        | 0.2541    |
| 2104 | 7940781 | RTN3      | 0.2540     | 0.0000        | 0.0000        | -0.1968   |
| 2105 | 8109528 | CYFIP2    | 0.0000     | 0.0000        | -0.2540       | 0.0000    |
| 2106 | 8112342 | ADAMTS6   | 0.1017     | 0.0000        | 0.0000        | -0.2539   |

| #    | ID      | Name     | SDHB.score | SDHD-AT.score | SDHD-HN.score | VHL.score |
|------|---------|----------|------------|---------------|---------------|-----------|
| 2107 | 7901951 | PGM1     | -0.0658    | 0.0000        | -0.0013       | 0.2537    |
| 2108 | 7938834 | NAV2     | 0.0022     | -0.2537       | 0.0000        | 0.0000    |
| 2109 | 8017599 | PECAM1   | -0.1490    | 0.0000        | 0.2537        | 0.0000    |
| 2110 | 8045075 | GPR17    | -0.2112    | 0.0000        | 0.2536        | 0.0033    |
| 2111 | 8144317 | KBTBD11  | 0.0000     | 0.0000        | -0.2536       | 0.0437    |
| 2112 | 8045974 | SLC4A10  | 0.0000     | 0.0000        | 0.2535        | -0.2046   |
| 2113 | 8036224 | TYROBP   | -0.0523    | 0.0000        | 0.2535        | 0.0000    |
| 2114 | 7912316 | CASZ1    | 0.0000     | -0.0932       | 0.0000        | 0.2533    |
| 2115 | 8028791 | PLD3     | 0.0000     | 0.2529        | 0.0000        | -0.1036   |
| 2116 | 8012013 | CLEC10A  | 0.0000     | 0.0000        | 0.2528        | 0.0000    |
| 2117 | 7914940 | MRPS15   | -0.0421    | 0.2528        | 0.0000        | 0.0000    |
| 2118 | 8058091 | SATB2    | 0.0000     | 0.0000        | 0.2399        | -0.2527   |
| 2119 | 7919326 | ACP6     | 0.0000     | 0.2526        | 0.0000        | -0.0624   |
| 2120 | 7893102 | ---      | 0.0000     | -0.2526       | 0.0000        | 0.0491    |
| 2121 | 8049540 | LRRFIP1  | -0.1546    | -0.2246       | 0.1001        | 0.2525    |
| 2122 | 8083415 | AADAC    | -0.0170    | 0.0000        | 0.0000        | 0.2525    |
| 2123 | 7992897 | ZNF174   | 0.1236     | 0.0000        | 0.0000        | -0.2524   |
| 2124 | 7927405 | WDFY4    | -0.0216    | 0.0000        | 0.2523        | 0.0000    |
| 2125 | 8138088 | C7orf70  | 0.0971     | 0.1037        | 0.0000        | -0.2523   |
| 2126 | 7950683 | NARS2    | 0.2421     | 0.0000        | 0.0000        | -0.2523   |
| 2127 | 8146527 | T1560    | 0.0000     | 0.0000        | 0.0000        | 0.2523    |
| 2128 | 8026193 | C19orf53 | 0.0000     | 0.2106        | 0.0000        | -0.2522   |
| 2129 | 7904761 | ITGA10   | -0.0663    | 0.0000        | 0.2522        | 0.0000    |
| 2130 | 7894165 | ---      | 0.0000     | 0.2522        | 0.0000        | -0.0037   |
| 2131 | 8112570 | MRPS27   | 0.0995     | 0.0000        | 0.0000        | -0.2520   |
| 2132 | 7943349 | FLJ32810 | 0.0000     | -0.2518       | 0.0000        | 0.0000    |
| 2133 | 8101780 | HPGDS    | -0.2037    | 0.0000        | 0.2516        | 0.0000    |
| 2134 | 8025828 | LDLR     | -0.1217    | 0.0000        | 0.0000        | 0.2516    |
| 2135 | 8084064 | MTHFD2   | 0.0000     | 0.0295        | 0.0000        | -0.2516   |
| 2136 | 8123006 | SYNJ2    | 0.0000     | -0.0023       | 0.2516        | 0.0000    |
| 2137 | 7913558 | LUZP1    | -0.1744    | 0.0000        | 0.2514        | 0.0370    |
| 2138 | 8174119 | ZMAT1    | 0.0000     | 0.0000        | -0.1350       | 0.2514    |
| 2139 | 8018975 | LGALS3BP | 0.0318     | 0.0000        | -0.2513       | 0.0000    |
| 2140 | 8056005 | ACVR1    | 0.0000     | 0.2407        | 0.0000        | -0.2513   |
| 2141 | 7894936 | ---      | -0.2511    | 0.0000        | 0.0000        | 0.0771    |
| 2142 | 8010770 | SLC16A3  | 0.0000     | -0.2382       | 0.0000        | 0.2511    |
| 2143 | 7914334 | SNRNP40  | -0.2511    | 0.2373        | 0.0000        | 0.0000    |
| 2144 | 7948987 | PLA2G16  | 0.0802     | 0.0000        | -0.2508       | 0.0000    |
| 2145 | 7897714 | FBXO44   | 0.0000     | 0.2508        | 0.0000        | -0.1215   |
| 2146 | 8128316 | GPR63    | 0.0000     | 0.0000        | -0.0842       | 0.2508    |
| 2147 | 7903334 | CDC14A   | -0.1784    | -0.0022       | 0.2508        | 0.0901    |
| 2148 | 8176286 | PLCXD1   | 0.2508     | 0.0000        | 0.0000        | -0.0772   |
| 2149 | 7971813 | THSD1    | -0.0440    | 0.0000        | 0.2506        | 0.0000    |
| 2150 | 8009301 | PRKCA    | 0.0000     | 0.0000        | 0.2506        | 0.0000    |
| 2151 | 8081867 | C3orf1   | 0.0000     | 0.0000        | 0.0000        | -0.2504   |
| 2152 | 7985364 | IL16     | -0.0266    | 0.0000        | 0.2503        | 0.0000    |
| 2153 | 7903541 | STXBP3   | -0.2502    | 0.0000        | 0.0000        | 0.1686    |
| 2154 | 7932014 | FLJ45983 | 0.1691     | 0.0075        | -0.2502       | -0.0800   |
| 2155 | 8164833 | GBGT1    | -0.0099    | 0.0000        | 0.2501        | 0.0000    |
| 2156 | 7894268 | ---      | 0.0644     | 0.0000        | 0.0000        | -0.2500   |
| 2157 | 7949400 | SLC25A45 | 0.2499     | 0.0000        | 0.0000        | -0.2455   |
| 2158 | 7916262 | C1orf123 | -0.2499    | 0.0000        | 0.0926        | 0.0000    |
| 2159 | 8167185 | TIMP1    | 0.0000     | 0.0000        | 0.2498        | 0.0000    |
| 2160 | 8083075 | ACPL2    | 0.0640     | 0.0000        | 0.0000        | -0.2497   |
| 2161 | 8005458 | LGALS9C  | -0.1049    | 0.0000        | 0.2496        | 0.0000    |
| 2162 | 7982269 | ---      | 0.2496     | 0.0000        | -0.0246       | -0.0091   |
| 2163 | 7894318 | ---      | -0.0623    | 0.0000        | 0.0000        | 0.2496    |
| 2164 | 8167673 | MAGED4   | 0.0000     | 0.1442        | -0.2494       | 0.0000    |
| 2165 | 8092594 | ---      | 0.0000     | 0.0000        | -0.2494       | 0.1724    |
| 2166 | 8178676 | NEU1     | 0.0617     | 0.0497        | 0.0000        | -0.2493   |
| 2167 | 8135734 | C7orf58  | -0.2492    | 0.0000        | 0.1362        | 0.1992    |
| 2168 | 8161563 | ---      | 0.0000     | 0.0000        | 0.2490        | 0.0000    |

| #    | ID      | Name      | SDHB.score | SDHD-AT.score | SDHD-HN.score | VHL.score |
|------|---------|-----------|------------|---------------|---------------|-----------|
| 2169 | 8149918 | CHRNA2    | 0.0000     | 0.0000        | 0.0000        | 0.2489    |
| 2170 | 8130438 | TFB1M     | 0.0000     | 0.0000        | -0.0405       | 0.2488    |
| 2171 | 7950136 | PHOX2A    | 0.0000     | 0.0000        | 0.0000        | -0.2487   |
| 2172 | 8046906 | GULP1     | 0.2487     | 0.0000        | -0.0076       | -0.1047   |
| 2173 | 8004506 | SNORA48   | -0.0233    | 0.0000        | 0.0000        | 0.2487    |
| 2174 | 8130916 | PHF10     | 0.0000     | 0.0000        | 0.0000        | 0.2486    |
| 2175 | 8041561 | MORN2     | 0.0000     | 0.2486        | 0.0000        | 0.0000    |
| 2176 | 8068254 | IL10RB    | -0.1373    | 0.0000        | 0.2486        | 0.0000    |
| 2177 | 8080810 | PTPRG     | -0.1951    | -0.1259       | 0.2485        | 0.1718    |
| 2178 | 8054308 | TBC1D8    | 0.0000     | 0.0000        | -0.2484       | 0.0000    |
| 2179 | 7993458 | C16orf45  | 0.0649     | 0.0000        | 0.0000        | -0.2484   |
| 2180 | 7893952 | ---       | -0.2484    | 0.0175        | 0.0000        | 0.0000    |
| 2181 | 7904048 | ---       | -0.2484    | 0.0000        | 0.1108        | 0.1788    |
| 2182 | 7897089 | PLCH2     | 0.0000     | 0.0000        | -0.0632       | 0.2483    |
| 2183 | 7924207 | PTPN14    | -0.2483    | 0.0000        | 0.2304        | 0.1799    |
| 2184 | 8160441 | CDKN2A    | 0.2078     | 0.0000        | -0.0419       | -0.2482   |
| 2185 | 7939738 | DDB2      | 0.2481     | 0.0000        | -0.0348       | -0.0069   |
| 2186 | 8072454 | RNF185    | 0.0051     | 0.2093        | 0.0000        | -0.2480   |
| 2187 | 7955533 | FLJ33996  | 0.0921     | 0.0000        | -0.2480       | 0.0000    |
| 2188 | 8116548 | DUSP22    | 0.0000     | -0.1371       | 0.2480        | 0.0000    |
| 2189 | 7914807 | ---       | 0.0000     | 0.2480        | 0.0000        | 0.0000    |
| 2190 | 7974314 | ---       | 0.0000     | 0.0000        | -0.2480       | 0.0000    |
| 2191 | 7904361 | FAM46C    | -0.0387    | 0.0000        | 0.2478        | 0.0000    |
| 2192 | 7914322 | SNORD103A | -0.2477    | 0.0000        | 0.0000        | 0.1574    |
| 2193 | 7947147 | SVIP      | 0.1952     | 0.0000        | 0.0000        | -0.2477   |
| 2194 | 8005809 | LGALS9    | -0.1448    | -0.0433       | 0.2477        | 0.0645    |
| 2195 | 7914094 | WASF2     | -0.2477    | 0.0000        | 0.1787        | 0.0464    |
| 2196 | 8019924 | MYL12A    | -0.1265    | 0.0000        | 0.2476        | 0.0000    |
| 2197 | 7900076 | TEKT2     | 0.0000     | 0.0000        | 0.0000        | 0.2476    |
| 2198 | 7948744 | GANAB     | 0.2470     | 0.0000        | 0.0000        | 0.0000    |
| 2199 | 8149625 | ---       | 0.0000     | 0.2469        | -0.0353       | 0.0000    |
| 2200 | 7944216 | ATP5L     | 0.1956     | 0.0000        | 0.0000        | -0.2469   |
| 2201 | 7933904 | CTNNA3    | 0.0000     | 0.0000        | 0.0000        | 0.2469    |
| 2202 | 7903908 | CEPT1     | -0.2468    | 0.0000        | 0.0000        | 0.0847    |
| 2203 | 7916910 | LRRC40    | -0.2467    | 0.0000        | 0.0000        | 0.1055    |
| 2204 | 7912196 | ---       | -0.2464    | 0.0560        | 0.0000        | 0.1062    |
| 2205 | 8031223 | LILRB1    | -0.0579    | 0.0000        | 0.2463        | 0.0000    |
| 2206 | 7922717 | RGS16     | -0.2218    | -0.0293       | 0.1149        | 0.2463    |
| 2207 | 7892962 | ---       | 0.0000     | 0.0000        | -0.2462       | 0.0000    |
| 2208 | 8099218 | PPP2R2C   | 0.0970     | 0.0000        | 0.0000        | -0.2462   |
| 2209 | 8116445 | FLT4      | -0.1348    | 0.0000        | 0.0000        | 0.2462    |
| 2210 | 7938925 | NELL1     | 0.2460     | 0.0000        | 0.0000        | -0.0763   |
| 2211 | 8169419 | ALG13     | 0.0000     | 0.0000        | 0.0000        | 0.2460    |
| 2212 | 8105220 | ISL1      | 0.1187     | 0.0000        | -0.2459       | 0.0000    |
| 2213 | 8149774 | LOXL2     | 0.0000     | -0.2458       | 0.0721        | 0.0000    |
| 2214 | 8047738 | NRP2      | -0.1352    | -0.2099       | 0.0565        | 0.2458    |
| 2215 | 7934215 | SPOCK2    | -0.1573    | 0.0000        | 0.0000        | 0.2456    |
| 2216 | 7900382 | CAP1      | -0.2455    | 0.0000        | 0.1585        | 0.0428    |
| 2217 | 8145055 | BMP1      | -0.1439    | 0.0000        | 0.0000        | 0.2454    |
| 2218 | 8086462 | C3orf39   | 0.0111     | 0.0000        | 0.0000        | -0.2454   |
| 2219 | 7918955 | GDAP2     | -0.2454    | 0.0551        | 0.0000        | 0.0037    |
| 2220 | 8112107 | PPAP2A    | -0.2454    | 0.0000        | 0.0275        | 0.1134    |
| 2221 | 8082238 | ---       | -0.1857    | 0.0000        | 0.2453        | 0.0502    |
| 2222 | 7971486 | C13orf18  | -0.1385    | 0.0000        | 0.2453        | 0.0000    |
| 2223 | 8060344 | TRIB3     | 0.0000     | 0.0000        | 0.0000        | -0.2452   |
| 2224 | 7978586 | CFL2      | 0.0157     | 0.0000        | 0.0000        | -0.2452   |
| 2225 | 8117018 | ---       | -0.0803    | -0.0697       | 0.0000        | 0.2452    |
| 2226 | 8123303 | PACRG     | 0.0000     | 0.0000        | -0.2450       | 0.2138    |
| 2227 | 7921571 | PEX19     | 0.0605     | 0.1591        | 0.0000        | -0.2449   |
| 2228 | 8052762 | GFPT1     | 0.0978     | 0.0000        | 0.0000        | -0.2449   |
| 2229 | 7952335 | SNORD14E  | 0.0000     | 0.0000        | -0.1594       | 0.2449    |
| 2230 | 8177867 | DDR1      | 0.0065     | 0.0000        | -0.2447       | 0.0000    |

| #    | ID      | Name      | SDHB.score | SDHD-AT.score | SDHD-HN.score | VHL.score |
|------|---------|-----------|------------|---------------|---------------|-----------|
| 2231 | 8123104 | FNDC1     | -0.0980    | 0.0000        | 0.2446        | 0.0000    |
| 2232 | 7896707 | ---       | -0.0428    | 0.0000        | 0.2446        | 0.0000    |
| 2233 | 7910014 | CNIH4     | 0.0000     | 0.0925        | 0.0000        | -0.2443   |
| 2234 | 8136370 | AGBL3     | -0.1733    | 0.0000        | 0.0000        | 0.2441    |
| 2235 | 7934898 | ANKRD22   | -0.0066    | 0.0000        | 0.2440        | 0.0000    |
| 2236 | 7902810 | LMO4      | -0.2285    | 0.0000        | 0.2436        | 0.0000    |
| 2237 | 7892679 | ---       | 0.0000     | 0.0884        | 0.0000        | -0.2435   |
| 2238 | 7893211 | ---       | 0.0408     | -0.2435       | 0.0000        | 0.0000    |
| 2239 | 8149590 | ---       | -0.1666    | -0.1010       | 0.0494        | 0.2434    |
| 2240 | 8011945 | KIAA0753  | 0.0000     | -0.2433       | 0.0000        | 0.0601    |
| 2241 | 8138547 | TOMM7     | 0.0000     | 0.2432        | 0.0000        | -0.0233   |
| 2242 | 7958784 | ALDH2     | 0.0000     | 0.0000        | 0.0000        | -0.2432   |
| 2243 | 8049752 | SNED1     | -0.1161    | 0.0000        | 0.2432        | 0.0000    |
| 2244 | 8055980 | CYTIP     | -0.0407    | 0.0000        | 0.2431        | 0.0000    |
| 2245 | 7903461 | NTNG1     | -0.1654    | 0.0000        | 0.0000        | 0.2429    |
| 2246 | 7906852 | UHMK1     | 0.0776     | 0.0000        | 0.0000        | -0.2429   |
| 2247 | 8080162 | ABHD14A   | 0.0000     | 0.2429        | 0.0000        | -0.1018   |
| 2248 | 7988753 | SPPL2A    | -0.0203    | 0.0000        | 0.2428        | 0.0000    |
| 2249 | 7987135 | ---       | 0.2428     | 0.0000        | -0.0264       | -0.1811   |
| 2250 | 7903972 | ATP5F1    | -0.1352    | 0.2427        | 0.0000        | 0.0000    |
| 2251 | 7920697 | GBA       | 0.0821     | 0.1763        | 0.0000        | -0.2427   |
| 2252 | 8088339 | ARF4      | 0.0000     | 0.0000        | 0.0000        | -0.2427   |
| 2253 | 8089727 | ---       | 0.0000     | 0.0000        | -0.2425       | 0.0000    |
| 2254 | 7969204 | WDFY2     | 0.0000     | 0.0000        | -0.2424       | 0.1533    |
| 2255 | 7933855 | RTKN2     | 0.0587     | 0.0000        | 0.0000        | -0.2423   |
| 2256 | 7950119 | C11orf59  | 0.0932     | 0.0000        | 0.0000        | -0.2423   |
| 2257 | 7892786 | ---       | 0.0000     | -0.2422       | 0.0000        | 0.0000    |
| 2258 | 7931353 | PTPRE     | -0.1483    | -0.2422       | 0.1716        | 0.2079    |
| 2259 | 8169365 | TMEM164   | 0.0000     | 0.0000        | -0.2422       | 0.0000    |
| 2260 | 8007799 | MGC57346  | 0.1413     | 0.2351        | -0.0951       | -0.2421   |
| 2261 | 8105191 | PARP8     | 0.0000     | -0.2421       | 0.0000        | 0.1854    |
| 2262 | 7934729 | C1D       | 0.0000     | 0.2421        | 0.0000        | -0.0277   |
| 2263 | 8180366 | ---       | 0.0000     | -0.0710       | 0.2419        | 0.0000    |
| 2264 | 7911539 | CCNL2     | -0.2293    | 0.0000        | 0.0000        | 0.2419    |
| 2265 | 8004184 | XAF1      | -0.1563    | -0.1963       | 0.1004        | 0.2417    |
| 2266 | 7898192 | DNAJC16   | -0.2417    | 0.0000        | 0.0000        | 0.1830    |
| 2267 | 8012906 | ---       | -0.0661    | -0.2415       | 0.0903        | 0.1440    |
| 2268 | 8004510 | CD68      | 0.0000     | 0.0000        | 0.2415        | 0.0000    |
| 2269 | 8043375 | ---       | 0.0000     | 0.2128        | 0.0000        | -0.2415   |
| 2270 | 7980908 | FBLN5     | -0.1987    | 0.0000        | 0.2414        | 0.0825    |
| 2271 | 7894879 | ---       | 0.0000     | -0.2414       | 0.0000        | 0.0000    |
| 2272 | 8078600 | TCEA1     | 0.0000     | 0.0000        | 0.0000        | -0.2412   |
| 2273 | 8067985 | NCAM2     | 0.0000     | 0.0878        | 0.0000        | -0.2412   |
| 2274 | 7894811 | ---       | -0.0509    | 0.2410        | 0.0000        | 0.0000    |
| 2275 | 7928705 | TSPAN14   | -0.1330    | -0.0036       | 0.2409        | 0.0340    |
| 2276 | 8038824 | SIGLEC10  | -0.0086    | 0.0000        | 0.2408        | 0.0000    |
| 2277 | 8056151 | PLA2R1    | -0.1962    | -0.1474       | 0.2407        | 0.1880    |
| 2278 | 7930921 | BAG3      | 0.0916     | 0.0000        | -0.2407       | 0.0000    |
| 2279 | 8121257 | PRDM1     | -0.2406    | 0.0000        | 0.1463        | 0.2063    |
| 2280 | 8139796 | LOC441233 | 0.0200     | -0.2405       | 0.0000        | 0.0000    |
| 2281 | 7898833 | KDM1      | -0.1385    | 0.2403        | 0.0000        | 0.0000    |
| 2282 | 7974418 | CGRRF1    | 0.0000     | 0.1386        | 0.0000        | -0.2403   |
| 2283 | 7905929 | EFNA1     | -0.0461    | 0.0000        | 0.2403        | 0.0000    |
| 2284 | 8094960 | SLC10A4   | 0.1347     | 0.0000        | -0.2402       | 0.0000    |
| 2285 | 8040113 | ASAP2     | -0.1268    | -0.2057       | 0.2401        | 0.1193    |
| 2286 | 8124158 | ---       | 0.0000     | 0.2399        | 0.0000        | 0.0000    |
| 2287 | 8098470 | WWC2      | 0.0000     | -0.2399       | 0.0000        | 0.0000    |
| 2288 | 8162117 | GOLM1     | 0.0000     | 0.0000        | 0.2399        | -0.0205   |
| 2289 | 8119357 | DAAM2     | -0.2183    | -0.0568       | 0.1384        | 0.2398    |
| 2290 | 7913187 | TMCO4     | 0.0000     | 0.0000        | 0.0000        | 0.2397    |
| 2291 | 7917885 | CNN3      | -0.2103    | 0.0000        | 0.2397        | 0.0000    |
| 2292 | 7893425 | ---       | 0.0000     | 0.2395        | 0.0000        | 0.0000    |

| #    | ID      | Name        | SDHB.score | SDHD-AT.score | SDHD-HN.score | VHL.score |
|------|---------|-------------|------------|---------------|---------------|-----------|
| 2293 | 8160346 | PTPLAD2     | -0.0786    | 0.0000        | 0.2395        | 0.0000    |
| 2294 | 7908161 | C1orf21     | -0.0355    | 0.0000        | 0.0000        | 0.2395    |
| 2295 | 8096617 | BANK1       | 0.0000     | -0.1180       | 0.0000        | 0.2395    |
| 2296 | 7980146 | NPC2        | 0.0000     | 0.0000        | 0.1334        | -0.2394   |
| 2297 | 8144726 | TUSC3       | 0.0000     | 0.0000        | -0.2392       | 0.0000    |
| 2298 | 8175539 | LDOC1       | 0.0000     | 0.2392        | 0.0000        | -0.1901   |
| 2299 | 7956743 | RPL14       | 0.0000     | 0.0000        | 0.0000        | -0.2389   |
| 2300 | 7915995 | FAF1        | -0.2387    | 0.0631        | 0.0000        | 0.0523    |
| 2301 | 8149248 | ---         | 0.0000     | 0.0000        | -0.2387       | 0.0000    |
| 2302 | 8038967 | ZNF83       | 0.0000     | -0.2386       | 0.0000        | 0.0793    |
| 2303 | 8131069 | GPER        | 0.0000     | -0.0319       | 0.0000        | 0.2386    |
| 2304 | 7922474 | KIAA0040    | -0.1660    | 0.0000        | 0.2386        | 0.0069    |
| 2305 | 8113691 | DTWD2       | 0.0000     | 0.0000        | 0.0000        | -0.2385   |
| 2306 | 7922152 | C1orf114    | 0.0000     | 0.1305        | -0.2384       | 0.0000    |
| 2307 | 8081055 | CHMP2B      | 0.0000     | 0.0000        | 0.2383        | -0.2380   |
| 2308 | 7902874 | LRRRC8C     | -0.1695    | 0.0000        | 0.0000        | 0.2382    |
| 2309 | 8039977 | SNTG2       | 0.0000     | 0.0000        | 0.2382        | -0.0898   |
| 2310 | 8052143 | GPR75       | 0.1187     | 0.0275        | 0.0000        | -0.2382   |
| 2311 | 7904726 | TXNIP       | -0.1173    | 0.0000        | 0.0000        | 0.2380    |
| 2312 | 8014891 | IKZF3       | 0.0000     | 0.0000        | 0.2379        | 0.0000    |
| 2313 | 7909418 | LOC148696   | 0.0000     | 0.0000        | -0.0196       | 0.2378    |
| 2314 | 8086406 | SEC22C      | 0.0000     | 0.0000        | 0.0000        | -0.2378   |
| 2315 | 7995258 | ZNF267      | -0.0792    | 0.0000        | 0.2378        | 0.0000    |
| 2316 | 7901123 | NASP        | -0.2377    | 0.0000        | 0.0000        | 0.1418    |
| 2317 | 8013671 | SPAG5       | 0.0000     | 0.0000        | -0.2375       | 0.1298    |
| 2318 | 8139031 | ---         | 0.0000     | 0.0000        | -0.2375       | 0.0000    |
| 2319 | 7904226 | SLC22A15    | 0.0243     | 0.0000        | 0.0000        | -0.2373   |
| 2320 | 7900235 | MACF1       | -0.2373    | 0.0000        | 0.2011        | 0.1722    |
| 2321 | 8037071 | RABAC1      | 0.0000     | 0.1755        | 0.0000        | -0.2373   |
| 2322 | 8157139 | ---         | 0.0000     | 0.2373        | 0.0000        | -0.0030   |
| 2323 | 7946559 | GNG10       | 0.0000     | 0.0370        | 0.0000        | -0.2372   |
| 2324 | 7991581 | CHSY1       | -0.1665    | 0.0000        | 0.2372        | 0.0614    |
| 2325 | 7944185 | CD3G        | 0.0000     | 0.0000        | 0.2371        | 0.0000    |
| 2326 | 8001111 | UBE2MP1     | 0.0000     | 0.2371        | 0.0000        | 0.0000    |
| 2327 | 7896390 | ---         | 0.0000     | -0.2370       | 0.0000        | 0.0000    |
| 2328 | 8159876 | RFX3        | 0.0000     | 0.0000        | 0.0000        | 0.2369    |
| 2329 | 7893298 | ---         | 0.0000     | 0.0478        | 0.0000        | -0.2369   |
| 2330 | 8133163 | ---         | 0.2347     | 0.0000        | 0.0000        | -0.2369   |
| 2331 | 8092162 | PP13439     | -0.0783    | -0.1867       | 0.0000        | 0.2368    |
| 2332 | 8098688 | ---         | 0.0000     | 0.0000        | 0.2368        | 0.0000    |
| 2333 | 8084607 | SEN2        | 0.0000     | 0.0000        | 0.0000        | -0.2368   |
| 2334 | 8110237 | UNC5A       | 0.0000     | 0.0000        | -0.2367       | 0.0000    |
| 2335 | 8046428 | RAPGEF4     | 0.0000     | 0.0000        | -0.0515       | 0.2365    |
| 2336 | 8117106 | RNF144B     | -0.2365    | 0.0000        | 0.1077        | 0.1938    |
| 2337 | 7900540 | RIMKLA      | -0.0582    | 0.0000        | 0.0000        | 0.2364    |
| 2338 | 8157153 | PALM2-AKAP2 | -0.0410    | -0.2364       | 0.1963        | 0.0415    |
| 2339 | 7951385 | CASP5       | -0.1048    | 0.0000        | 0.2362        | 0.0000    |
| 2340 | 7975167 | GPHN        | 0.0077     | 0.0000        | 0.0000        | -0.2362   |
| 2341 | 8122365 | GPR126      | -0.2362    | 0.0000        | 0.1496        | 0.0852    |
| 2342 | 7898211 | DDI2        | -0.2361    | 0.0000        | 0.1595        | 0.2013    |
| 2343 | 7937200 | CALY        | 0.0000     | 0.0000        | 0.0000        | 0.2360    |
| 2344 | 7966026 | NUAK1       | -0.0797    | 0.0000        | 0.2360        | 0.0000    |
| 2345 | 7954143 | PTPRO       | 0.0000     | 0.0000        | 0.0000        | 0.2359    |
| 2346 | 8169603 | LONRF3      | 0.0000     | 0.0840        | -0.2357       | 0.0000    |
| 2347 | 8102877 | CLGN        | 0.0000     | 0.1929        | 0.0000        | -0.2357   |
| 2348 | 8021866 | NFATC1      | 0.0000     | -0.0281       | 0.2357        | 0.0000    |
| 2349 | 7959827 | TMEM132C    | 0.1038     | 0.0000        | -0.2357       | 0.0000    |
| 2350 | 8049073 | ---         | 0.0000     | 0.2356        | 0.0000        | -0.1735   |
| 2351 | 7943760 | SIK2        | 0.2356     | 0.0000        | -0.1886       | 0.0000    |
| 2352 | 8023593 | MC4R        | 0.0000     | 0.0000        | 0.0000        | 0.2356    |
| 2353 | 7975459 | SIPA1L1     | 0.0175     | 0.0000        | -0.2355       | 0.0000    |
| 2354 | 7915468 | CCDC23      | -0.1378    | 0.2354        | 0.0158        | 0.0000    |

| #    | ID      | Name     | SDHB.score | SDHD-AT.score | SDHD-HN.score | VHL.score |
|------|---------|----------|------------|---------------|---------------|-----------|
| 2355 | 8128638 | SCML4    | 0.0000     | 0.0000        | 0.0000        | 0.2352    |
| 2356 | 7901048 | SNORD46  | -0.2084    | 0.0000        | 0.0000        | 0.2351    |
| 2357 | 7900354 | PPIE     | -0.2351    | 0.2265        | 0.0000        | 0.0908    |
| 2358 | 8021563 | ---      | 0.0000     | -0.2351       | -0.0265       | 0.1563    |
| 2359 | 8040090 | RNF144A  | 0.1490     | 0.0000        | -0.2351       | 0.0000    |
| 2360 | 7896472 | ---      | 0.0000     | 0.0458        | 0.0000        | -0.2350   |
| 2361 | 8000574 | NUPR1    | -0.0295    | 0.0000        | 0.2350        | 0.0000    |
| 2362 | 7913249 | PINK1    | -0.1224    | 0.0000        | 0.0000        | 0.2349    |
| 2363 | 8015349 | KRT19    | 0.0000     | 0.0000        | -0.1342       | 0.2348    |
| 2364 | 7914592 | TMEM54   | 0.0000     | 0.0000        | 0.1734        | -0.2348   |
| 2365 | 8081612 | ABHD10   | 0.0000     | 0.0085        | 0.0000        | -0.2348   |
| 2366 | 8174509 | GNG5     | -0.2347    | 0.0000        | 0.0000        | 0.1745    |
| 2367 | 8149927 | CLU      | 0.0000     | 0.0000        | -0.2345       | 0.0234    |
| 2368 | 8113761 | ZNF608   | -0.0608    | 0.0000        | 0.0000        | 0.2345    |
| 2369 | 7980828 | CCDC88C  | -0.0238    | -0.2202       | 0.2345        | 0.0000    |
| 2370 | 8041447 | CRIM1    | 0.0000     | 0.0000        | 0.2344        | 0.0000    |
| 2371 | 7950731 | PRCP     | 0.0000     | -0.2189       | 0.2344        | 0.0000    |
| 2372 | 7893736 | ---      | -0.1867    | 0.0000        | 0.0000        | 0.2343    |
| 2373 | 7917472 | GTF2B    | -0.2342    | 0.0826        | 0.0000        | 0.0000    |
| 2374 | 8146943 | ---      | 0.0000     | 0.0000        | 0.2342        | 0.0000    |
| 2375 | 7896446 | ---      | 0.0000     | 0.0000        | 0.0000        | -0.2340   |
| 2376 | 7946228 | TPP1     | 0.1881     | 0.0000        | 0.0000        | -0.2340   |
| 2377 | 7991234 | MFGE8    | -0.1502    | 0.0000        | 0.0000        | 0.2339    |
| 2378 | 8133477 | GTF2IRD1 | 0.1912     | 0.0000        | -0.2338       | -0.0702   |
| 2379 | 8071907 | UPB1     | 0.0000     | 0.0000        | -0.0200       | 0.2337    |
| 2380 | 8075695 | APOL3    | -0.1394    | 0.0000        | 0.2336        | 0.0256    |
| 2381 | 8048468 | FAM134A  | 0.1230     | 0.0000        | 0.0000        | -0.2335   |
| 2382 | 7893459 | ---      | -0.2333    | 0.0000        | 0.0000        | 0.1254    |
| 2383 | 8131179 | TTYH3    | -0.0143    | 0.0000        | 0.0000        | 0.2333    |
| 2384 | 8015681 | CCR10    | 0.0042     | 0.1953        | -0.2332       | 0.0000    |
| 2385 | 7892742 | ---      | 0.0417     | 0.0000        | 0.0000        | -0.2332   |
| 2386 | 8157605 | STOM     | -0.2060    | -0.0381       | 0.2331        | 0.1558    |
| 2387 | 7902594 | PRKACB   | -0.2329    | 0.0000        | 0.0000        | 0.0495    |
| 2388 | 8010841 | FN3K     | 0.0000     | 0.0000        | -0.2328       | 0.0000    |
| 2389 | 8026024 | ASNA1    | 0.0000     | 0.2328        | 0.0000        | -0.0549   |
| 2390 | 8080438 | SPCS1    | 0.0000     | 0.0982        | 0.0000        | -0.2327   |
| 2391 | 8109120 | AFAP1L1  | -0.1584    | -0.1577       | 0.0908        | 0.2327    |
| 2392 | 7932130 | ---      | 0.2326     | 0.0000        | -0.1691       | -0.0267   |
| 2393 | 7895073 | ---      | 0.0266     | -0.2326       | 0.0000        | 0.0000    |
| 2394 | 7940869 | FERMT3   | -0.0311    | 0.0000        | 0.2325        | 0.0000    |
| 2395 | 7901895 | ATG4C    | -0.2325    | 0.0000        | 0.1195        | 0.0000    |
| 2396 | 8130674 | PDE10A   | 0.0352     | 0.0000        | -0.2325       | 0.0000    |
| 2397 | 8111101 | ANKH     | 0.0000     | 0.2325        | -0.0763       | 0.0000    |
| 2398 | 8131414 | ZDHHC4   | 0.0651     | 0.2221        | 0.0000        | -0.2324   |
| 2399 | 7932118 | BEND7    | 0.2323     | 0.0000        | -0.1185       | -0.0444   |
| 2400 | 8095251 | ---      | -0.0454    | 0.0000        | 0.2323        | 0.0000    |
| 2401 | 8118571 | PSMB9    | 0.0000     | 0.0000        | 0.2323        | 0.0000    |
| 2402 | 7911260 | OR2M1P   | 0.0000     | 0.2322        | 0.0000        | 0.0000    |
| 2403 | 8008201 | NGFR     | 0.0000     | 0.0000        | 0.2322        | 0.0000    |
| 2404 | 8070701 | CSTB     | 0.0000     | 0.0000        | 0.0000        | -0.2321   |
| 2405 | 8085797 | THRB     | 0.0000     | 0.0000        | 0.2317        | -0.1188   |
| 2406 | 7893007 | ---      | 0.0000     | -0.2032       | 0.0000        | 0.2316    |
| 2407 | 7911941 | CHD5     | 0.0000     | 0.0000        | 0.2315        | 0.0000    |
| 2408 | 8028656 | PLEKHG2  | -0.0462    | -0.1622       | 0.2315        | 0.0000    |
| 2409 | 8129069 | ---      | 0.0000     | -0.2315       | 0.0000        | 0.0000    |
| 2410 | 8155354 | FAM74A3  | 0.0000     | 0.0000        | 0.2314        | 0.0000    |
| 2411 | 7899160 | CD52     | 0.0000     | 0.0000        | 0.2314        | 0.0000    |
| 2412 | 8101031 | CDKL2    | 0.2253     | 0.0000        | -0.1108       | -0.2313   |
| 2413 | 8013450 | LGALS9B  | -0.1071    | 0.0000        | 0.2313        | 0.0000    |
| 2414 | 8021818 | GALR1    | 0.0000     | 0.0000        | -0.2312       | 0.1083    |
| 2415 | 8082767 | TMEM108  | 0.0000     | 0.0000        | 0.0508        | -0.2311   |
| 2416 | 7918759 | BCAS2    | 0.0000     | 0.2309        | 0.0000        | 0.0000    |

| #    | ID      | Name         | SDHB.score | SDHD-AT.score | SDHD-HN.score | VHL.score |
|------|---------|--------------|------------|---------------|---------------|-----------|
| 2417 | 8097801 | FAM160A1     | 0.0000     | 0.2309        | 0.0000        | -0.1759   |
| 2418 | 7981488 | LOC100288144 | 0.0000     | 0.0000        | -0.2309       | 0.0000    |
| 2419 | 7897078 | RER1         | -0.2307    | 0.0000        | 0.0000        | 0.0868    |
| 2420 | 8074237 | CECR1        | -0.0550    | 0.0000        | 0.0000        | 0.2305    |
| 2421 | 8138231 | THSD7A       | 0.0000     | -0.2274       | 0.0000        | 0.2304    |
| 2422 | 8170716 | PLXNB3       | 0.0000     | 0.0000        | -0.2303       | 0.0000    |
| 2423 | 7949995 | MRPL21       | 0.2302     | 0.0000        | 0.0000        | -0.1731   |
| 2424 | 8054722 | IL1B         | -0.1323    | 0.0000        | 0.2301        | 0.0000    |
| 2425 | 8111220 | CDH18        | 0.0000     | 0.0617        | -0.2298       | 0.0000    |
| 2426 | 7974900 | FLJ43390     | 0.0000     | -0.0021       | 0.0000        | 0.2297    |
| 2427 | 8150818 | TCEA1        | 0.0000     | 0.0000        | 0.0000        | -0.2297   |
| 2428 | 7958410 | FICD         | 0.2070     | 0.0000        | 0.0000        | -0.2297   |
| 2429 | 7902992 | RPAP2        | -0.2295    | 0.0000        | 0.0000        | 0.0837    |
| 2430 | 7942645 | ---          | 0.0000     | -0.2292       | 0.0000        | 0.0280    |
| 2431 | 8129071 | FRK          | -0.1174    | 0.0000        | 0.2290        | 0.0000    |
| 2432 | 8082643 | NEK11        | -0.1935    | 0.0000        | 0.0000        | 0.2289    |
| 2433 | 7899688 | KPNA6        | -0.2286    | 0.0775        | 0.0000        | 0.0094    |
| 2434 | 8073015 | KDELRL3      | -0.0712    | 0.0000        | 0.2285        | 0.0000    |
| 2435 | 8169709 | GLRX5        | 0.0000     | 0.0714        | 0.0000        | -0.2282   |
| 2436 | 7916016 | ---          | -0.2281    | 0.0000        | 0.0000        | 0.0648    |
| 2437 | 7941946 | NDUFV1       | 0.2281     | 0.0000        | 0.0000        | -0.1940   |
| 2438 | 8048995 | ITM2C        | 0.0000     | 0.0000        | -0.2279       | 0.0000    |
| 2439 | 7997504 | CDH13        | 0.0000     | -0.2279       | 0.0134        | 0.0000    |
| 2440 | 8055183 | SMPD4        | 0.0942     | 0.0000        | -0.2279       | 0.0000    |
| 2441 | 7911862 | LRRC47       | -0.0138    | 0.2279        | 0.0000        | 0.0000    |
| 2442 | 7917037 | CRYZ         | -0.2278    | 0.0000        | 0.0604        | 0.0283    |
| 2443 | 7951131 | ---          | 0.0000     | -0.1758       | 0.2277        | 0.0000    |
| 2444 | 8066683 | CDH22        | 0.0000     | 0.0000        | -0.1005       | 0.2277    |
| 2445 | 8132897 | LANCL2       | 0.0000     | 0.2277        | -0.1614       | 0.0000    |
| 2446 | 8040725 | DPYSL5       | 0.1641     | 0.0000        | -0.2276       | -0.0647   |
| 2447 | 8047381 | CFLAR        | -0.2276    | 0.0000        | 0.1968        | 0.1114    |
| 2448 | 8165974 | CLCN4        | 0.0000     | 0.2275        | 0.0000        | 0.0000    |
| 2449 | 7955729 | MFSD5        | 0.0064     | 0.0000        | 0.0000        | -0.2275   |
| 2450 | 7893279 | ---          | 0.0000     | 0.0000        | 0.2275        | -0.0116   |
| 2451 | 8070655 | U2AF1        | -0.0721    | 0.0000        | 0.2275        | 0.0000    |
| 2452 | 7900585 | YBX1         | -0.2274    | 0.0000        | 0.0727        | 0.1092    |
| 2453 | 8024120 | ABCA7        | 0.0333     | 0.0000        | 0.0000        | -0.2274   |
| 2454 | 8049532 | LRRFIP1      | -0.1603    | -0.0988       | 0.0595        | 0.2274    |
| 2455 | 8152828 | GSDMC        | 0.0000     | 0.0000        | 0.2274        | 0.0000    |
| 2456 | 7904965 | PDE4DIP      | 0.1672     | 0.1763        | -0.2273       | -0.1695   |
| 2457 | 8017619 | ---          | -0.2137    | -0.1536       | 0.2211        | 0.2271    |
| 2458 | 8175169 | RAP2C        | 0.0000     | 0.0000        | -0.2269       | 0.0000    |
| 2459 | 7914917 | LSM10        | 0.0000     | 0.2268        | 0.0000        | -0.1080   |
| 2460 | 8015712 | CCDC56       | 0.0000     | 0.0680        | 0.0000        | -0.2268   |
| 2461 | 8089723 | ---          | 0.0000     | 0.0000        | -0.2268       | 0.0000    |
| 2462 | 8137219 | C7orf29      | 0.0000     | -0.0470       | 0.0000        | 0.2266    |
| 2463 | 8022045 | MYOM1        | -0.0175    | -0.0048       | 0.0000        | 0.2265    |
| 2464 | 8012605 | GAS7         | -0.0052    | 0.0000        | 0.2265        | 0.0000    |
| 2465 | 8056837 | GPR155       | 0.0000     | 0.0198        | -0.2264       | 0.0000    |
| 2466 | 7974473 | FBXO34       | 0.0115     | 0.0000        | 0.0000        | -0.2264   |
| 2467 | 7952022 | AMICA1       | -0.1124    | 0.0000        | 0.2263        | 0.0000    |
| 2468 | 7951479 | SLN          | 0.0000     | 0.0000        | 0.0000        | 0.2263    |
| 2469 | 8002778 | MLKL         | -0.2185    | -0.0692       | 0.2262        | 0.1918    |
| 2470 | 7921667 | CD48         | 0.0000     | 0.0000        | 0.2259        | 0.0000    |
| 2471 | 8154512 | ADAMTSL1     | -0.0963    | 0.0000        | 0.2258        | 0.0000    |
| 2472 | 8057797 | SDPR         | -0.1092    | 0.0000        | 0.0000        | 0.2258    |
| 2473 | 7960518 | TNFRSF1A     | -0.0426    | 0.0000        | 0.2258        | 0.0000    |
| 2474 | 8002975 | CDYL2        | -0.0331    | 0.0000        | 0.2257        | 0.0000    |
| 2475 | 8171205 | NLGN4X       | 0.0000     | 0.0000        | 0.2257        | 0.0000    |
| 2476 | 7927964 | SRGN         | -0.2257    | 0.0000        | 0.0937        | 0.1338    |
| 2477 | 8172056 | RPGR         | -0.2256    | 0.0000        | 0.1195        | 0.1881    |
| 2478 | 7895724 | ---          | 0.0000     | -0.2256       | 0.0000        | 0.1037    |



| #    | ID      | Name     | SDHB.score | SDHD-AT.score | SDHD-HN.score | VHL.score |
|------|---------|----------|------------|---------------|---------------|-----------|
| 2479 | 8027402 | CCNE1    | 0.1647     | 0.0075        | -0.0038       | -0.2256   |
| 2480 | 8012896 | PMP22    | 0.0000     | -0.0519       | 0.2253        | 0.0000    |
| 2481 | 8067248 | PPP4R1L  | -0.0375    | 0.0000        | 0.0000        | 0.2252    |
| 2482 | 7951662 | CRYAB    | -0.2252    | 0.0000        | 0.1139        | 0.0607    |
| 2483 | 8093145 | C3orf34  | 0.0000     | 0.0862        | 0.0000        | -0.2251   |
| 2484 | 8101322 | MOP-1    | -0.2250    | 0.0000        | 0.1569        | 0.1228    |
| 2485 | 7933008 | ---      | -0.1330    | -0.1641       | 0.2250        | 0.1178    |
| 2486 | 8079037 | TRAK1    | 0.0000     | 0.0000        | 0.2248        | 0.0000    |
| 2487 | 8041206 | LBH      | -0.1409    | 0.0000        | 0.2247        | 0.0120    |
| 2488 | 8132387 | POU6F2   | 0.0000     | -0.0260       | 0.0000        | 0.2246    |
| 2489 | 8152962 | LRRRC6   | -0.2246    | 0.0000        | 0.0000        | 0.1568    |
| 2490 | 8106986 | RHOBTB3  | -0.0319    | 0.0000        | 0.0000        | 0.2246    |
| 2491 | 7894874 | ---      | 0.0000     | 0.2245        | 0.0000        | 0.0000    |
| 2492 | 7893734 | ---      | 0.0000     | 0.2245        | 0.0000        | -0.0332   |
| 2493 | 8056361 | ---      | -0.0722    | -0.1357       | 0.0000        | 0.2244    |
| 2494 | 7960850 | SLC2A14  | -0.1586    | 0.0000        | 0.0000        | 0.2244    |
| 2495 | 8180390 | ---      | 0.0735     | 0.0000        | -0.2244       | 0.0000    |
| 2496 | 7948718 | EML3     | 0.0000     | -0.2243       | 0.0012        | 0.0000    |
| 2497 | 7973974 | PAX9     | 0.0000     | 0.0000        | 0.2242        | -0.0030   |
| 2498 | 8079772 | APEH     | 0.0000     | 0.0000        | 0.0000        | -0.2242   |
| 2499 | 7907769 | FAM163A  | 0.0204     | 0.1331        | -0.2241       | 0.0000    |
| 2500 | 8059111 | ABCB6    | 0.0185     | 0.0000        | -0.2241       | 0.0000    |
| 2501 | 8099631 | ---      | -0.2241    | 0.0000        | 0.0196        | 0.0000    |
| 2502 | 8049528 | LRRFIP1  | -0.0225    | -0.2240       | 0.0547        | 0.0974    |
| 2503 | 8088371 | DNASE1L3 | -0.2240    | -0.0179       | 0.2232        | 0.1775    |
| 2504 | 7911854 | KIAA0495 | 0.0000     | -0.2240       | 0.0000        | 0.0479    |
| 2505 | 7905754 | ATP8B2   | 0.0000     | 0.0426        | 0.0000        | -0.2240   |
| 2506 | 8023843 | FBXO15   | 0.0000     | 0.0000        | -0.2239       | 0.0361    |
| 2507 | 8079021 | CTNBN1   | -0.1469    | -0.0068       | 0.2239        | 0.0652    |
| 2508 | 7978260 | DHRS1    | 0.0000     | 0.2239        | 0.0000        | 0.0000    |
| 2509 | 8094688 | LIAS     | 0.0000     | 0.2237        | 0.0000        | 0.0000    |
| 2510 | 8096919 | ALPK1    | 0.0000     | -0.1773       | 0.2237        | 0.0000    |
| 2511 | 7925511 | PLD5     | 0.2236     | 0.0000        | -0.0537       | 0.0000    |
| 2512 | 7957688 | C12orf63 | -0.1045    | 0.0000        | 0.0000        | 0.2236    |
| 2513 | 7893946 | ---      | 0.0000     | -0.2236       | 0.0000        | 0.0000    |
| 2514 | 7995017 | STX4     | -0.0820    | 0.0000        | 0.0000        | 0.2235    |
| 2515 | 8120215 | PAQR8    | -0.0495    | 0.0000        | 0.2235        | 0.0000    |
| 2516 | 8030914 | ZNF610   | 0.0083     | 0.0000        | 0.0000        | -0.2235   |
| 2517 | 8166408 | PHEX     | -0.0511    | 0.0000        | 0.0000        | 0.2233    |
| 2518 | 7973743 | BNIP3    | 0.0000     | 0.0000        | -0.2233       | 0.1361    |
| 2519 | 8110123 | FAM153B  | 0.0000     | 0.0000        | 0.0000        | 0.2232    |
| 2520 | 7896253 | ---      | 0.0000     | 0.0000        | 0.0000        | -0.2231   |
| 2521 | 8008768 | PPM1E    | 0.0867     | 0.0000        | 0.0000        | -0.2231   |
| 2522 | 8061447 | PYGB     | 0.1607     | 0.0000        | 0.0000        | -0.2231   |
| 2523 | 7952132 | SLC37A4  | 0.2231     | 0.0000        | 0.0000        | -0.0791   |
| 2524 | 7923426 | UBE2T    | 0.2230     | 0.0000        | 0.0000        | -0.1748   |
| 2525 | 8081548 | PVRL3    | 0.0000     | 0.0000        | 0.0564        | -0.2230   |
| 2526 | 8090133 | CCDC14   | -0.0243    | 0.0000        | 0.2229        | 0.0000    |
| 2527 | 8080964 | GLT8D4   | 0.0000     | 0.0000        | 0.2228        | 0.0000    |
| 2528 | 7976496 | SERPINA3 | 0.0000     | -0.0099       | 0.2228        | 0.0000    |
| 2529 | 8135922 | METTL2B  | 0.0820     | 0.0000        | -0.2227       | 0.0000    |
| 2530 | 7903321 | RTCD1    | -0.2226    | 0.0000        | 0.0000        | 0.0225    |
| 2531 | 8034565 | DNASE2   | 0.0000     | 0.0000        | 0.0000        | -0.2226   |
| 2532 | 7918157 | VAV3     | -0.2224    | 0.0000        | 0.1766        | 0.1638    |
| 2533 | 8034920 | ILVBL    | 0.0000     | 0.2224        | 0.0000        | -0.0772   |
| 2534 | 8142084 | YBX1P2   | -0.2223    | 0.0000        | 0.0450        | 0.0263    |
| 2535 | 7930413 | DUSP5    | -0.1485    | 0.0000        | 0.0000        | 0.2223    |
| 2536 | 8084945 | ---      | 0.0000     | 0.2223        | 0.0000        | 0.0000    |
| 2537 | 7998952 | TIGD7    | 0.2223     | 0.0000        | -0.0106       | -0.1066   |
| 2538 | 7902104 | PDE4B    | -0.1802    | 0.0000        | 0.0000        | 0.2222    |
| 2539 | 7916969 | ZRANB2   | -0.2222    | 0.0000        | 0.0000        | 0.0000    |
| 2540 | 7892890 | ---      | 0.0621     | -0.2221       | 0.0000        | 0.0000    |

| #    | ID      | Name    | SDHB.score | SDHD-AT.score | SDHD-HN.score | VHL.score |
|------|---------|---------|------------|---------------|---------------|-----------|
| 2541 | 8039378 | SYT5    | 0.0000     | 0.2220        | 0.0000        | 0.0000    |
| 2542 | 7972828 | ANKRD10 | -0.1813    | -0.0451       | 0.0753        | 0.2219    |
| 2543 | 7995793 | MT1L    | -0.0711    | -0.0275       | 0.0000        | 0.2219    |
| 2544 | 8092707 | LEPREL1 | -0.1660    | -0.0454       | 0.0414        | 0.2218    |
| 2545 | 7896487 | ---     | -0.2218    | 0.0000        | 0.0000        | 0.0815    |
| 2546 | 7952305 | BMPR1A  | 0.2218     | 0.0000        | -0.0639       | -0.1428   |
| 2547 | 8124307 | CMAH    | -0.1305    | -0.1796       | 0.2216        | 0.1237    |
| 2548 | 8013071 | FLCN    | 0.2213     | 0.0000        | 0.0000        | -0.1394   |
| 2549 | 7914974 | GRIK3   | 0.0000     | 0.0000        | -0.2212       | 0.0416    |
| 2550 | 8044611 | ---     | 0.0000     | 0.0000        | 0.2211        | 0.0000    |
| 2551 | 8003357 | FAM38A  | -0.0751    | -0.1076       | 0.2211        | 0.0140    |
| 2552 | 7995783 | MT2A    | -0.1444    | 0.0000        | 0.0000        | 0.2211    |
| 2553 | 7992887 | ZNF75A  | 0.1382     | 0.0000        | 0.0000        | -0.2208   |
| 2554 | 8084742 | LPP     | -0.0597    | -0.0411       | 0.2208        | 0.0000    |
| 2555 | 7951437 | GUCY1A2 | -0.1145    | -0.1192       | 0.0000        | 0.2207    |
| 2556 | 7893141 | ---     | 0.0000     | 0.0000        | 0.0000        | 0.2206    |
| 2557 | 7915870 | ATPAF1  | -0.2206    | 0.0000        | 0.0000        | 0.0762    |
| 2558 | 7896750 | ---     | 0.0000     | 0.2205        | 0.0000        | -0.0448   |
| 2559 | 7919168 | PDE4DIP | 0.0828     | 0.0000        | -0.2204       | 0.0000    |
| 2560 | 8000716 | SEZ6L2  | 0.0000     | 0.2204        | 0.0000        | -0.1100   |
| 2561 | 8138361 | RPL36A  | 0.0000     | 0.2203        | 0.0000        | -0.1604   |
| 2562 | 8093294 | CCR2    | 0.0000     | 0.0000        | 0.2203        | 0.0000    |
| 2563 | 7902382 | RABGGTB | 0.0000     | 0.2202        | 0.0000        | 0.0000    |
| 2564 | 7916443 | USP24   | -0.2202    | 0.0000        | 0.0000        | 0.1677    |
| 2565 | 8045776 | GALNT13 | 0.0866     | 0.0183        | 0.0000        | -0.2201   |
| 2566 | 7912112 | DNAJC11 | -0.2201    | 0.0182        | 0.0000        | 0.0562    |
| 2567 | 8135162 | PRKRIP1 | 0.0000     | 0.2201        | 0.0000        | 0.0000    |
| 2568 | 8117653 | ---     | 0.2009     | 0.0000        | 0.0000        | -0.2199   |
| 2569 | 8032509 | GNG7    | 0.0000     | 0.0000        | 0.1718        | -0.2198   |
| 2570 | 8017547 | ICAM2   | -0.0291    | 0.0000        | 0.2198        | 0.0000    |
| 2571 | 8100007 | PHOX2B  | 0.1915     | 0.0000        | -0.2196       | -0.0632   |
| 2572 | 7980718 | ---     | 0.0000     | 0.2196        | 0.0000        | 0.0000    |
| 2573 | 7919382 | ---     | 0.0000     | -0.1212       | -0.0217       | 0.2195    |
| 2574 | 8005785 | KSR1    | 0.0000     | 0.0000        | 0.0000        | 0.2193    |
| 2575 | 8003771 | ---     | 0.0000     | -0.2192       | 0.0000        | 0.0000    |
| 2576 | 8158250 | CERCAM  | 0.1023     | 0.0000        | 0.0000        | -0.2191   |
| 2577 | 8031047 | MYADM   | 0.0000     | 0.0000        | 0.2190        | 0.0000    |
| 2578 | 7928855 | BMPR1A  | 0.2189     | 0.0000        | -0.0482       | -0.1666   |
| 2579 | 8078380 | ZNF860  | 0.0000     | 0.0000        | 0.2189        | 0.0000    |
| 2580 | 8051762 | SLC8A1  | -0.0609    | 0.0000        | 0.0000        | 0.2189    |
| 2581 | 8004057 | KIF1C   | 0.0000     | -0.2188       | 0.1447        | 0.0000    |
| 2582 | 7916808 | SLC35D1 | -0.2188    | 0.0000        | 0.0000        | 0.1900    |
| 2583 | 8083352 | SELT    | 0.0000     | 0.0000        | 0.0000        | -0.2187   |
| 2584 | 7927502 | SLC18A3 | 0.0000     | 0.0000        | 0.0000        | 0.2187    |
| 2585 | 8102518 | C4orf3  | -0.0776    | -0.1276       | 0.0000        | 0.2186    |
| 2586 | 8089928 | ---     | -0.2186    | 0.0000        | 0.0855        | 0.1136    |
| 2587 | 7985442 | ---     | 0.2021     | 0.0000        | -0.0523       | -0.2186   |
| 2588 | 8066822 | SULF2   | 0.0000     | 0.0000        | 0.2186        | 0.0000    |
| 2589 | 8062119 | MT1JP   | -0.1172    | 0.0000        | 0.0000        | 0.2186    |
| 2590 | 8103745 | HAND2   | 0.0215     | 0.0407        | 0.0000        | -0.2184   |
| 2591 | 8161337 | FAM74A3 | 0.0000     | 0.0000        | 0.2184        | 0.0000    |
| 2592 | 8016094 | GJC1    | 0.0000     | -0.2184       | 0.0518        | 0.0025    |
| 2593 | 7956200 | MYL6B   | 0.0000     | 0.2184        | 0.0000        | -0.1751   |
| 2594 | 7896171 | ---     | -0.2167    | 0.0000        | 0.0000        | 0.2184    |
| 2595 | 7914665 | ---     | -0.0624    | 0.0000        | 0.0000        | 0.2182    |
| 2596 | 8073032 | TOMM22  | 0.0000     | 0.2181        | 0.0000        | -0.0572   |
| 2597 | 8146500 | LYN     | 0.1774     | 0.0000        | -0.0145       | -0.2181   |
| 2598 | 7952046 | MPZL2   | -0.1554    | -0.0230       | 0.2179        | 0.0881    |
| 2599 | 8166202 | GRPR    | 0.0000     | -0.0562       | 0.0000        | 0.2178    |
| 2600 | 7983306 | WDR76   | 0.2177     | 0.0000        | 0.0000        | -0.0364   |
| 2601 | 8137280 | NOS3    | -0.0262    | 0.0000        | 0.2177        | 0.0000    |
| 2602 | 8107563 | PRR16   | -0.0271    | 0.0000        | 0.2174        | 0.0000    |

| #    | ID      | Name          | SDHB.score | SDHD-AT.score | SDHD-HN.score | VHL.score |
|------|---------|---------------|------------|---------------|---------------|-----------|
| 2603 | 8116130 | FAM153B       | 0.0000     | 0.0000        | 0.0000        | 0.2172    |
| 2604 | 8064879 | TRMT6         | 0.2172     | 0.0000        | -0.0467       | -0.0505   |
| 2605 | 8087530 | CAMKV         | 0.2172     | 0.0000        | -0.0971       | -0.0594   |
| 2606 | 8060940 | C20orf103     | 0.0000     | 0.0000        | 0.2171        | 0.0000    |
| 2607 | 7918703 | AP4B1         | -0.1253    | 0.0000        | 0.0000        | 0.2169    |
| 2608 | 8025058 | TRIP10        | -0.1679    | 0.0000        | 0.2169        | 0.0343    |
| 2609 | 7934731 | C1D           | 0.0000     | 0.2167        | 0.0000        | 0.0000    |
| 2610 | 7945275 | VPS26B        | 0.1647     | 0.0000        | -0.2167       | 0.0000    |
| 2611 | 7893888 | ---           | 0.0713     | 0.0047        | 0.0000        | -0.2166   |
| 2612 | 7964759 | GRIP1         | 0.0000     | 0.0000        | -0.2166       | 0.0000    |
| 2613 | 7928401 | CHCHD1        | 0.0000     | 0.1042        | 0.0000        | -0.2165   |
| 2614 | 7955562 | ACVRL1        | -0.1021    | 0.0000        | 0.2165        | 0.0000    |
| 2615 | 8150318 | FGFR1         | 0.0258     | -0.2165       | 0.0000        | 0.0000    |
| 2616 | 7974190 | DNAJC19       | 0.0000     | 0.1483        | 0.0000        | -0.2164   |
| 2617 | 8058390 | RAPH1         | -0.1944    | -0.0347       | 0.1062        | 0.2163    |
| 2618 | 8005857 | TMEM199       | 0.0000     | 0.2163        | 0.0000        | -0.2133   |
| 2619 | 7898070 | PRDM2         | -0.2163    | 0.0000        | 0.0000        | 0.1756    |
| 2620 | 7937135 | C10orf93      | 0.0000     | 0.0000        | -0.1968       | 0.2163    |
| 2621 | 8071206 | MRPL40        | 0.0000     | 0.2163        | 0.0000        | -0.1128   |
| 2622 | 8079598 | ZNF589        | 0.0000     | 0.0000        | 0.0000        | -0.2161   |
| 2623 | 8101304 | RASGEF1B      | -0.1504    | 0.0000        | 0.2161        | 0.0000    |
| 2624 | 8037355 | ZNF428        | 0.0000     | 0.0000        | 0.0000        | -0.2161   |
| 2625 | 7913582 | ZNF436        | -0.0731    | 0.0000        | 0.2160        | 0.0000    |
| 2626 | 8126760 | RCAN2         | 0.0000     | 0.0000        | 0.2160        | 0.0000    |
| 2627 | 7944223 | MLL           | 0.0942     | -0.2159       | 0.0000        | 0.0000    |
| 2628 | 8039389 | PTPRH         | 0.0939     | 0.0000        | 0.0000        | -0.2157   |
| 2629 | 7918857 | TSPAN2        | -0.0326    | 0.0000        | 0.0000        | 0.2155    |
| 2630 | 8178855 | PSMB8         | 0.0000     | 0.0000        | 0.2153        | 0.0000    |
| 2631 | 7954711 | C12orf35      | -0.1428    | -0.0390       | 0.2152        | 0.0797    |
| 2632 | 8085914 | SLC4A7        | -0.1184    | -0.0980       | 0.2152        | 0.0732    |
| 2633 | 7984319 | MAP2K1        | 0.0000     | 0.2151        | 0.0000        | 0.0000    |
| 2634 | 7892935 | ---           | 0.0000     | 0.2148        | 0.0000        | -0.0729   |
| 2635 | 7896325 | ---           | 0.0064     | -0.2148       | 0.0000        | 0.0000    |
| 2636 | 7894952 | ---           | 0.0000     | 0.0000        | 0.0000        | 0.2148    |
| 2637 | 7952361 | ZNF202        | 0.0000     | -0.2147       | 0.0000        | 0.0000    |
| 2638 | 7903294 | HIAT1         | -0.2147    | 0.1394        | 0.0000        | 0.0000    |
| 2639 | 8157253 | SNX30         | 0.0077     | 0.0000        | 0.0000        | -0.2147   |
| 2640 | 8027241 | ZNF253        | 0.0000     | 0.2146        | 0.0000        | 0.0000    |
| 2641 | 7913712 | FUSIP1        | -0.2146    | 0.0000        | 0.0000        | 0.0634    |
| 2642 | 8069541 | SAMSN1        | -0.1942    | 0.0000        | 0.2145        | 0.0885    |
| 2643 | 8105506 | ZSWIM6        | -0.0298    | -0.2145       | 0.0000        | 0.1705    |
| 2644 | 8128079 | SRrp35        | 0.2145     | 0.0000        | 0.0000        | -0.1257   |
| 2645 | 7940191 | STX3          | 0.1194     | 0.0000        | 0.0000        | -0.2145   |
| 2646 | 8173621 | KIAA2022      | 0.0995     | 0.1156        | -0.2143       | -0.0556   |
| 2647 | 8023822 | CBLN2         | -0.0577    | 0.0000        | 0.2142        | 0.0000    |
| 2648 | 7944082 | TAGLN         | -0.0619    | 0.0000        | 0.2141        | 0.0000    |
| 2649 | 7983051 | SPTBN5        | 0.0000     | 0.0000        | 0.2141        | 0.0000    |
| 2650 | 8034827 | GIPC1         | 0.0698     | 0.0000        | 0.0000        | -0.2140   |
| 2651 | 8004497 | EIF4A1        | 0.0000     | -0.2139       | 0.0000        | 0.0708    |
| 2652 | 8169995 | FAM122C       | -0.0641    | 0.0000        | 0.0000        | 0.2139    |
| 2653 | 7937900 | STIM1         | 0.0787     | 0.0000        | 0.0000        | -0.2139   |
| 2654 | 7961483 | HIST4H4       | -0.0373    | 0.0000        | 0.0000        | 0.2138    |
| 2655 | 7935535 | CRTAC1        | -0.1158    | 0.0000        | 0.0000        | 0.2138    |
| 2656 | 8143028 | CHCHD3        | 0.0000     | 0.0368        | 0.0000        | -0.2136   |
| 2657 | 7903854 | SLC6A17       | 0.0000     | 0.2135        | 0.0000        | 0.0000    |
| 2658 | 8114287 | SPOCK1        | 0.0000     | 0.0000        | 0.2135        | -0.1700   |
| 2659 | 8095751 | DKFZP564O0823 | 0.0000     | 0.2135        | 0.0000        | 0.0000    |
| 2660 | 8068478 | CHAF1B        | 0.2134     | 0.0000        | -0.0259       | -0.1734   |
| 2661 | 8138504 | RAPGEF5       | -0.1497    | 0.0000        | 0.0000        | 0.2134    |
| 2662 | 7952557 | SRPR          | 0.2134     | 0.0000        | 0.0000        | -0.1268   |
| 2663 | 8129783 | MAP7          | 0.0006     | 0.2134        | -0.1626       | 0.0000    |
| 2664 | 7949075 | TRMT112       | 0.2133     | 0.0000        | 0.0000        | -0.2013   |

| #    | ID      | Name         | SDHB.score | SDHD-AT.score | SDHD-HN.score | VHL.score |
|------|---------|--------------|------------|---------------|---------------|-----------|
| 2665 | 8127563 | COL12A1      | -0.1413    | -0.0800       | 0.2133        | 0.0977    |
| 2666 | 8147313 | TMEM67       | -0.2133    | 0.0000        | 0.0000        | 0.1760    |
| 2667 | 8038029 | CARD8        | -0.0770    | 0.0000        | 0.2132        | 0.0000    |
| 2668 | 7917604 | ZNF644       | -0.2132    | 0.0000        | 0.0156        | 0.0000    |
| 2669 | 7895518 | ---          | 0.0286     | 0.1266        | 0.0000        | -0.2131   |
| 2670 | 7912086 | NOL9         | -0.2130    | 0.0000        | 0.0000        | 0.0733    |
| 2671 | 7908003 | NPL          | -0.1475    | 0.0000        | 0.2130        | 0.0617    |
| 2672 | 8152133 | RRM2B        | 0.2128     | 0.0000        | 0.0000        | 0.0000    |
| 2673 | 7976556 | C14orf132    | 0.1934     | 0.1586        | -0.2029       | -0.2127   |
| 2674 | 8138613 | OSBPL3       | 0.0000     | 0.0000        | 0.2126        | 0.0000    |
| 2675 | 8049574 | UBE2F        | 0.0000     | 0.0477        | 0.0000        | -0.2125   |
| 2676 | 8151967 | STK3         | 0.0000     | 0.0000        | 0.2124        | 0.0000    |
| 2677 | 7947934 | MTCH2        | 0.1637     | 0.0000        | 0.0000        | -0.2124   |
| 2678 | 7893061 | ---          | -0.0113    | 0.2123        | 0.0000        | 0.0000    |
| 2679 | 8167601 | USP27X       | 0.0000     | 0.0000        | -0.2123       | 0.0000    |
| 2680 | 7901720 | PRKAA2       | -0.0280    | 0.0000        | -0.1322       | 0.2123    |
| 2681 | 8069332 | MCM3APAS     | 0.1791     | 0.0000        | -0.2122       | 0.0000    |
| 2682 | 7892665 | ---          | 0.0000     | -0.2121       | 0.0000        | 0.0245    |
| 2683 | 8163599 | DFNB31       | 0.0000     | 0.0000        | -0.2121       | 0.0926    |
| 2684 | 8055941 | RPRM         | -0.0862    | 0.0000        | 0.2120        | 0.0000    |
| 2685 | 7990971 | CPEB1        | 0.0000     | 0.2119        | 0.0000        | -0.1138   |
| 2686 | 8023497 | ATP8B1       | -0.2119    | 0.0000        | 0.1734        | 0.1052    |
| 2687 | 8051012 | PREB         | 0.0579     | 0.0000        | 0.0000        | -0.2119   |
| 2688 | 7942342 | INPPL1       | 0.2119     | 0.0000        | 0.0000        | 0.0000    |
| 2689 | 7954481 | SSPN         | -0.0263    | -0.0252       | 0.2117        | 0.0000    |
| 2690 | 8073682 | PARVG        | -0.1638    | 0.0000        | 0.2115        | 0.0207    |
| 2691 | 7981317 | ---          | 0.0000     | 0.0000        | 0.0000        | 0.2113    |
| 2692 | 8067113 | ZNF217       | 0.0000     | 0.0000        | 0.2113        | 0.0000    |
| 2693 | 7951838 | ZNF259       | 0.0000     | -0.2113       | 0.0000        | 0.0000    |
| 2694 | 7896321 | ---          | 0.0000     | 0.0000        | 0.0000        | -0.2113   |
| 2695 | 8092578 | ETV5         | 0.0000     | 0.0000        | -0.2113       | 0.2078    |
| 2696 | 8156309 | GADD45G      | 0.0000     | 0.0000        | 0.0000        | 0.2112    |
| 2697 | 8016532 | GNGT2        | -0.1409    | 0.0000        | 0.2111        | 0.0000    |
| 2698 | 8056963 | LOC100129455 | 0.0000     | 0.0000        | -0.2110       | 0.0576    |
| 2699 | 7997542 | NECAB2       | 0.0000     | -0.0340       | 0.0000        | 0.2110    |
| 2700 | 8026954 | PIK3R2       | 0.0051     | 0.2109        | 0.0000        | -0.1209   |
| 2701 | 8169294 | COL4A5       | 0.0000     | -0.1077       | -0.2108       | 0.0472    |
| 2702 | 8096385 | HERC3        | 0.0000     | 0.0000        | 0.0000        | 0.2107    |
| 2703 | 8032284 | UQCR         | 0.0000     | 0.2107        | 0.0000        | -0.0496   |
| 2704 | 7943919 | TTC12        | 0.0114     | 0.0000        | -0.2107       | 0.0000    |
| 2705 | 8005097 | HS3ST3B1     | 0.0000     | 0.0000        | 0.0000        | 0.2105    |
| 2706 | 8042637 | DYSF         | -0.1559    | -0.1508       | 0.1160        | 0.2105    |
| 2707 | 7929958 | BTRC         | 0.1589     | 0.0000        | -0.2104       | -0.0305   |
| 2708 | 8060897 | PLCB4        | 0.0000     | 0.0000        | -0.2104       | 0.0501    |
| 2709 | 8034130 | KANK2        | -0.0297    | 0.0000        | 0.2103        | 0.0000    |
| 2710 | 7940904 | VEGFB        | 0.2101     | 0.0000        | 0.0000        | -0.1000   |
| 2711 | 8088745 | FRMD4B       | 0.0000     | 0.0000        | 0.2100        | -0.0059   |
| 2712 | 8144699 | ---          | 0.0000     | 0.0000        | -0.2098       | 0.0000    |
| 2713 | 7940643 | ASRGL1       | 0.2098     | 0.0000        | -0.1372       | -0.0731   |
| 2714 | 7948379 | OSBP         | 0.2098     | 0.0000        | 0.0000        | 0.0000    |
| 2715 | 7911359 | NOC2L        | -0.0846    | 0.2098        | 0.0000        | 0.0000    |
| 2716 | 8047702 | ICOS         | 0.0000     | 0.0000        | 0.2097        | 0.0000    |
| 2717 | 8138789 | JAZF1        | 0.0000     | 0.2097        | 0.0000        | 0.0000    |
| 2718 | 8070953 | C21orf56     | 0.0000     | 0.2097        | 0.0000        | 0.0000    |
| 2719 | 8029950 | EHD2         | -0.0111    | -0.0088       | 0.2096        | 0.0000    |
| 2720 | 7919856 | LASS2        | 0.0523     | 0.0000        | 0.0000        | -0.2096   |
| 2721 | 7970162 | ATP11A       | 0.0000     | -0.2096       | 0.0000        | 0.2053    |
| 2722 | 8023481 | NARS         | 0.0485     | 0.0000        | 0.0000        | -0.2096   |
| 2723 | 8032815 | UBXN6        | 0.0000     | 0.2095        | 0.0000        | 0.0000    |
| 2724 | 7922008 | TADA1L       | 0.1497     | 0.0725        | -0.2095       | -0.1083   |
| 2725 | 8101260 | ANTXR2       | 0.0000     | -0.0413       | -0.0759       | 0.2093    |
| 2726 | 7912638 | C1orf126     | -0.0894    | 0.0000        | 0.0000        | 0.2093    |

| #    | ID      | Name     | SDHB.score | SDHD-AT.score | SDHD-HN.score | VHL.score |
|------|---------|----------|------------|---------------|---------------|-----------|
| 2727 | 7965357 | GALNT4   | -0.0171    | 0.0000        | 0.2091        | 0.0000    |
| 2728 | 7978595 | BAZ1A    | 0.0000     | -0.2090       | 0.0725        | 0.0109    |
| 2729 | 8174636 | SUMO2    | 0.0000     | 0.0000        | 0.0000        | -0.2090   |
| 2730 | 7921144 | SH2D2A   | 0.0000     | 0.0000        | 0.0000        | 0.2090    |
| 2731 | 7899016 | SDHD     | 0.2088     | 0.0000        | 0.0000        | -0.0889   |
| 2732 | 8138997 | TBX20    | 0.0000     | 0.0343        | -0.2088       | 0.0000    |
| 2733 | 8178322 | SUMO2    | 0.0000     | 0.0005        | 0.0000        | -0.2087   |
| 2734 | 7963786 | ITGA5    | -0.0684    | -0.2087       | 0.1931        | 0.0687    |
| 2735 | 7941714 | C11orf80 | 0.2086     | 0.0000        | 0.0000        | -0.0885   |
| 2736 | 7967230 | DIABLO   | 0.1052     | 0.0000        | -0.2085       | 0.0000    |
| 2737 | 7950555 | LRRC32   | -0.1819    | 0.0000        | 0.2084        | 0.0520    |
| 2738 | 7911263 | OR2M5    | 0.0000     | 0.2084        | 0.0000        | 0.0000    |
| 2739 | 7906435 | DARC     | -0.0455    | 0.0000        | 0.2083        | 0.0000    |
| 2740 | 8007212 | STAT5A   | -0.0802    | -0.2083       | 0.0758        | 0.1569    |
| 2741 | 8176163 | GAB3     | -0.1485    | 0.0000        | 0.2079        | 0.0469    |
| 2742 | 7896468 | ---      | -0.2079    | 0.0000        | 0.0000        | 0.1205    |
| 2743 | 7919729 | APH1A    | 0.0270     | 0.0000        | 0.0000        | -0.2079   |
| 2744 | 8132515 | BLVRA    | 0.0000     | 0.0000        | 0.0000        | -0.2078   |
| 2745 | 8043456 | ---      | 0.0000     | 0.0000        | 0.2078        | 0.0000    |
| 2746 | 8043393 | THNSL2   | 0.0000     | -0.2076       | 0.0000        | 0.0000    |
| 2747 | 8080762 | ABHD6    | 0.0000     | 0.0000        | 0.0112        | -0.2075   |
| 2748 | 8065693 | NECAB3   | 0.0000     | 0.2075        | 0.0000        | -0.1879   |
| 2749 | 7987960 | TTBK2    | 0.1250     | 0.0000        | 0.0000        | -0.2073   |
| 2750 | 7955663 | TENC1    | -0.1652    | 0.0000        | 0.2072        | 0.0593    |
| 2751 | 7945086 | TIRAP    | 0.2072     | 0.0000        | 0.0000        | 0.0000    |
| 2752 | 7940996 | PRDX5    | 0.2072     | 0.0000        | -0.0189       | -0.0540   |
| 2753 | 7951807 | CADM1    | 0.2072     | 0.0000        | -0.1677       | 0.0000    |
| 2754 | 7929536 | ---      | -0.0866    | 0.0000        | 0.2071        | 0.0000    |
| 2755 | 7895347 | ---      | 0.0000     | 0.2070        | 0.0000        | 0.0000    |
| 2756 | 7932390 | TRDMT1   | -0.2069    | 0.0000        | 0.0000        | 0.1704    |
| 2757 | 7917676 | GLMN     | -0.2069    | 0.0000        | 0.0000        | 0.1306    |
| 2758 | 7895031 | ---      | 0.0000     | 0.2068        | 0.0000        | -0.1460   |
| 2759 | 8149258 | MFHAS1   | 0.0000     | 0.0000        | 0.2068        | 0.0000    |
| 2760 | 8147573 | OSR2     | 0.0000     | 0.0000        | 0.2068        | 0.0000    |
| 2761 | 8019912 | EMILIN2  | -0.0037    | 0.0000        | 0.2068        | 0.0000    |
| 2762 | 8050089 | TMSL2    | -0.1684    | 0.0000        | 0.2068        | 0.0000    |
| 2763 | 7925561 | FAM36A   | 0.0000     | -0.2068       | 0.0000        | 0.2039    |
| 2764 | 7994280 | IL4R     | -0.2067    | 0.0000        | 0.1673        | 0.1515    |
| 2765 | 7895348 | ---      | 0.2067     | 0.0000        | 0.0000        | -0.1115   |
| 2766 | 8180349 | ---      | -0.0134    | 0.0000        | 0.2065        | 0.0000    |
| 2767 | 8012257 | TP53     | 0.0000     | -0.2063       | 0.0825        | 0.0000    |
| 2768 | 7946089 | TRIM5    | -0.0143    | -0.2062       | 0.0264        | 0.0952    |
| 2769 | 7896065 | ---      | 0.0000     | -0.2061       | 0.0000        | 0.0729    |
| 2770 | 8006214 | ADAP2    | 0.0000     | -0.0756       | 0.2061        | 0.0000    |
| 2771 | 8055494 | ---      | 0.0000     | 0.0181        | -0.2060       | 0.0000    |
| 2772 | 7992219 | BAIAP3   | -0.2059    | 0.1739        | 0.0000        | 0.2055    |
| 2773 | 8107194 | C5orf30  | 0.1805     | 0.0000        | 0.0000        | -0.2058   |
| 2774 | 8169717 | GRIA3    | 0.0000     | 0.0000        | 0.0000        | 0.2058    |
| 2775 | 8085660 | DPH3     | 0.0000     | 0.0000        | 0.0000        | -0.2057   |
| 2776 | 8107321 | C5orf26  | 0.1789     | 0.0517        | -0.1014       | -0.2056   |
| 2777 | 7985569 | ---      | 0.2054     | 0.0000        | -0.0576       | -0.1610   |
| 2778 | 8069252 | PCBP3    | 0.1355     | 0.0000        | 0.0000        | -0.2054   |
| 2779 | 7914617 | AK2      | -0.2054    | 0.0000        | 0.0000        | 0.0962    |
| 2780 | 7894532 | ---      | 0.0000     | -0.2053       | 0.0000        | 0.0000    |
| 2781 | 7903455 | ---      | 0.2053     | 0.0000        | -0.1134       | 0.0000    |
| 2782 | 8056716 | METTL5   | 0.0991     | 0.0000        | 0.0000        | -0.2053   |
| 2783 | 8168081 | ---      | -0.0823    | 0.0000        | 0.0000        | 0.2051    |
| 2784 | 8001394 | TOX3     | 0.0006     | 0.2051        | -0.0914       | -0.0358   |
| 2785 | 7892573 | ---      | 0.1000     | 0.0000        | 0.0000        | -0.2050   |
| 2786 | 7916609 | JUN      | -0.2049    | 0.0000        | 0.0000        | 0.1554    |
| 2787 | 8039642 | VN1R1    | 0.2047     | 0.0000        | -0.1663       | -0.0779   |
| 2788 | 8141459 | GAL3ST4  | -0.0249    | 0.0000        | 0.2047        | 0.0000    |

| #    | ID      | Name     | SDHB.score | SDHD-AT.score | SDHD-HN.score | VHL.score |
|------|---------|----------|------------|---------------|---------------|-----------|
| 2789 | 8125545 | HLA-DOA  | -0.1153    | 0.0000        | 0.2047        | 0.0000    |
| 2790 | 7960689 | MLF2     | 0.0000     | 0.0926        | 0.0000        | -0.2046   |
| 2791 | 7969171 | DLEU1    | 0.0327     | 0.0589        | 0.0000        | -0.2046   |
| 2792 | 7905801 | TDRD10   | -0.0332    | 0.0000        | 0.2045        | 0.0000    |
| 2793 | 7950628 | INTS4    | 0.2045     | 0.0000        | -0.0297       | 0.0000    |
| 2794 | 8146448 | MRPL15   | 0.0000     | 0.0000        | 0.0000        | -0.2042   |
| 2795 | 8043666 | CNNM3    | 0.0000     | 0.0000        | -0.2042       | 0.0000    |
| 2796 | 8163402 | ROD1     | 0.0000     | 0.0000        | 0.2041        | -0.0761   |
| 2797 | 8173245 | MTMR8    | 0.0189     | 0.0008        | -0.2040       | 0.0000    |
| 2798 | 7968789 | C13orf15 | -0.1981    | 0.0000        | 0.0000        | 0.2040    |
| 2799 | 8057954 | C2orf66  | -0.1128    | 0.0000        | 0.0000        | 0.2039    |
| 2800 | 8052654 | PELI1    | -0.2039    | 0.0000        | 0.1759        | 0.1635    |
| 2801 | 7892862 | ---      | 0.0000     | 0.2038        | 0.0000        | -0.0048   |
| 2802 | 8142912 | TMEM209  | 0.0037     | 0.0000        | -0.2038       | 0.0000    |
| 2803 | 8180223 | ---      | -0.0550    | -0.0981       | 0.0000        | 0.2038    |
| 2804 | 7894001 | ---      | 0.0000     | -0.2038       | 0.0000        | 0.0000    |
| 2805 | 8085537 | ZFYVE20  | 0.0000     | 0.0000        | 0.0000        | -0.2037   |
| 2806 | 7954104 | ATF7IP   | -0.0219    | 0.0000        | 0.0000        | 0.2037    |
| 2807 | 7953981 | ETV6     | 0.0000     | -0.2036       | 0.1452        | 0.0000    |
| 2808 | 8006415 | TMEM98   | 0.0000     | 0.0000        | 0.2036        | 0.0000    |
| 2809 | 7955055 | SLC48A1  | 0.1168     | 0.0000        | 0.0000        | -0.2035   |
| 2810 | 7914075 | FCN3     | -0.2033    | 0.0000        | 0.1133        | 0.0000    |
| 2811 | 7932826 | KIAA1462 | -0.1541    | 0.0000        | 0.2032        | 0.0793    |
| 2812 | 8074695 | MGC16703 | 0.0000     | 0.0499        | -0.2032       | 0.0000    |
| 2813 | 8077931 | MKRN2    | 0.0000     | 0.0000        | 0.0000        | -0.2032   |
| 2814 | 8073548 | SEPT3    | 0.0000     | 0.2032        | 0.0000        | -0.0360   |
| 2815 | 8131111 | EIF3B    | 0.0000     | 0.0000        | -0.2032       | 0.0000    |
| 2816 | 8138353 | MEOX2    | 0.0000     | 0.0000        | 0.2031        | 0.0000    |
| 2817 | 7903393 | S1PR1    | -0.1899    | 0.0000        | 0.2030        | 0.0534    |
| 2818 | 7917151 | NEXN     | 0.0000     | 0.2029        | 0.0000        | 0.0000    |
| 2819 | 7930894 | GRK5     | 0.0000     | 0.0000        | 0.0000        | -0.2028   |
| 2820 | 8005235 | MPRIP    | 0.0000     | -0.2027       | 0.0000        | 0.0000    |
| 2821 | 7902308 | FPGT     | -0.2027    | 0.0000        | 0.0000        | 0.0123    |
| 2822 | 8109383 | GRIA1    | 0.0000     | 0.0000        | 0.0000        | 0.2026    |
| 2823 | 8133034 | ---      | 0.0831     | 0.0000        | -0.2025       | 0.0000    |
| 2824 | 8105661 | C5orf44  | 0.0000     | 0.0000        | 0.0000        | -0.2024   |
| 2825 | 8000184 | IGSF6    | -0.0783    | 0.0000        | 0.2023        | 0.0000    |
| 2826 | 8124594 | SCAND3   | 0.0131     | 0.0000        | -0.2021       | 0.0000    |
| 2827 | 8040742 | MAPRE3   | 0.0000     | 0.2020        | 0.0000        | -0.0931   |
| 2828 | 7899990 | NCDN     | 0.0000     | 0.2020        | 0.0000        | 0.0000    |
| 2829 | 8057554 | CACYBP   | 0.2020     | 0.0000        | 0.0000        | -0.1933   |
| 2830 | 7977046 | TNFAIP2  | -0.0944    | 0.0000        | 0.2020        | 0.0000    |
| 2831 | 8130505 | EZR      | 0.0000     | -0.0076       | 0.2020        | 0.0000    |
| 2832 | 7894655 | ---      | 0.0000     | -0.2019       | 0.0000        | 0.0873    |
| 2833 | 7999217 | ROGDI    | 0.0000     | 0.0000        | -0.2018       | 0.0000    |
| 2834 | 7892966 | ---      | 0.0290     | 0.0000        | 0.0000        | -0.2017   |
| 2835 | 8006627 | ZNHIT3   | 0.0000     | 0.2016        | 0.0000        | 0.0000    |
| 2836 | 7986977 | TJP1     | -0.0648    | -0.0768       | 0.2016        | 0.0000    |
| 2837 | 7979108 | TRIM9    | 0.0000     | 0.0000        | -0.2015       | 0.0000    |
| 2838 | 7982294 | OTUD7A   | 0.1966     | 0.0000        | 0.0000        | -0.2014   |
| 2839 | 7955063 | TMEM106C | 0.1806     | 0.0000        | -0.0590       | -0.2014   |
| 2840 | 8033445 | CD209    | -0.1437    | 0.0000        | 0.2014        | 0.0000    |
| 2841 | 7930870 | TOMM22   | 0.0000     | 0.1581        | 0.0000        | -0.2013   |
| 2842 | 8168345 | ACRC     | -0.0536    | 0.0000        | 0.0000        | 0.2012    |
| 2843 | 8022952 | BRUNOL4  | 0.0000     | 0.0000        | -0.2012       | 0.0000    |
| 2844 | 8109938 | RANBP17  | 0.1335     | 0.0000        | 0.0000        | -0.2012   |
| 2845 | 8072710 | APOL6    | -0.2012    | 0.0000        | 0.1132        | 0.0964    |
| 2846 | 8105741 | MAST4    | 0.0000     | 0.0000        | 0.2011        | 0.0000    |
| 2847 | 8086899 | NME6     | 0.0182     | 0.0000        | 0.0000        | -0.2011   |
| 2848 | 7957032 | YEATS4   | 0.0012     | 0.0803        | 0.0000        | -0.2011   |
| 2849 | 7916590 | AK2      | -0.2010    | 0.0000        | 0.0000        | 0.0318    |
| 2850 | 7896422 | ---      | -0.2010    | 0.0335        | 0.0000        | 0.0000    |

| #    | ID      | Name         | SDHB.score | SDHD-AT.score | SDHD-HN.score | VHL.score |
|------|---------|--------------|------------|---------------|---------------|-----------|
| 2851 | 8123920 | ELOVL2       | 0.1266     | 0.0000        | 0.0000        | -0.2009   |
| 2852 | 8060893 | ---          | 0.0000     | -0.2009       | 0.0787        | 0.0000    |
| 2853 | 7896438 | ---          | 0.0000     | 0.0000        | 0.2008        | 0.0000    |
| 2854 | 7943690 | DDX10        | 0.0195     | -0.2008       | 0.0000        | 0.0000    |
| 2855 | 8114213 | ---          | 0.0000     | 0.1922        | 0.0000        | -0.2007   |
| 2856 | 8174937 | ODZ1         | 0.1303     | 0.0000        | -0.2006       | -0.0329   |
| 2857 | 8069057 | PFKL         | 0.0000     | 0.0000        | 0.0000        | 0.2006    |
| 2858 | 7952339 | SNORD14C     | 0.0000     | 0.0000        | -0.0686       | 0.2006    |
| 2859 | 7982252 | DKFZP434L187 | 0.0245     | 0.0000        | -0.2005       | 0.0000    |
| 2860 | 8132399 | C7orf36      | 0.0104     | 0.1659        | 0.0000        | -0.2005   |
| 2861 | 7909494 | SYT14        | 0.1701     | 0.0000        | -0.2005       | -0.0916   |
| 2862 | 7937476 | RPLP2        | 0.0000     | 0.0000        | 0.0000        | -0.2004   |
| 2863 | 8072113 | SRRD         | 0.0000     | 0.0000        | 0.0000        | -0.2003   |
| 2864 | 7956937 | RAP1B        | -0.0619    | 0.0000        | 0.2002        | 0.0000    |
| 2865 | 7972663 | ---          | 0.0000     | 0.0000        | -0.2002       | 0.0000    |
| 2866 | 8041781 | EPAS1        | -0.2002    | 0.0000        | 0.1990        | 0.0000    |
| 2867 | 7995776 | MT3          | 0.0000     | 0.0000        | 0.0000        | 0.2002    |
| 2868 | 7925876 | PFKP         | 0.0000     | 0.0000        | 0.0000        | 0.2001    |
| 2869 | 8154951 | GLUL         | -0.0153    | -0.0964       | 0.2001        | 0.0000    |
| 2870 | 7893571 | ---          | 0.0483     | 0.0000        | 0.0000        | -0.2000   |
| 2871 | 7912537 | DHRS3        | -0.2000    | 0.0000        | 0.1109        | 0.1343    |
| 2872 | 8022640 | DHFR         | 0.0000     | 0.0000        | 0.0000        | -0.1997   |
| 2873 | 7916570 | OMA1         | -0.1996    | 0.0000        | 0.0000        | 0.0000    |
| 2874 | 7923700 | LRRN2        | 0.0000     | 0.0758        | -0.1996       | 0.0000    |
| 2875 | 8141425 | TAF6         | 0.0872     | 0.0000        | 0.0000        | -0.1996   |
| 2876 | 7907970 | ---          | 0.0000     | 0.1996        | 0.0000        | -0.0267   |
| 2877 | 7960158 | ZNF10        | 0.0000     | 0.0000        | -0.1995       | 0.0000    |
| 2878 | 7927169 | ZNF487       | -0.0712    | -0.0274       | 0.0000        | 0.1995    |
| 2879 | 7960919 | MFAP5        | 0.0000     | -0.0658       | 0.1995        | 0.0000    |
| 2880 | 7895555 | ---          | 0.1506     | -0.1391       | -0.1995       | 0.0000    |
| 2881 | 8109824 | ---          | 0.0000     | 0.0000        | -0.1994       | 0.1757    |
| 2882 | 7985192 | AGPHD1       | 0.0642     | 0.0000        | 0.0000        | -0.1993   |
| 2883 | 8025382 | LASS4        | 0.0265     | 0.1482        | 0.0000        | -0.1992   |
| 2884 | 8015759 | VAT1         | 0.0000     | 0.0400        | 0.0000        | -0.1992   |
| 2885 | 8140686 | SEMA3D       | -0.1424    | 0.0000        | 0.1991        | 0.0061    |
| 2886 | 8006453 | CCL8         | -0.1838    | 0.0000        | 0.1986        | 0.0162    |
| 2887 | 7908147 | TSEN15       | 0.0531     | 0.0000        | 0.0000        | -0.1985   |
| 2888 | 8138834 | FKBP14       | 0.1294     | 0.0000        | 0.0000        | -0.1985   |
| 2889 | 7962375 | PRICKLE1     | 0.0000     | 0.0000        | 0.1984        | 0.0000    |
| 2890 | 8016832 | MMD          | 0.1504     | 0.0000        | 0.0000        | -0.1983   |
| 2891 | 8073194 | GRAP2        | 0.0000     | 0.0000        | 0.1981        | 0.0000    |
| 2892 | 7959153 | COX6A1       | 0.0000     | 0.1664        | 0.0000        | -0.1980   |
| 2893 | 7895187 | ---          | 0.1979     | -0.1571       | 0.0000        | 0.0000    |
| 2894 | 8180240 | ---          | 0.0000     | 0.0000        | -0.1977       | 0.0000    |
| 2895 | 8015868 | MPP2         | 0.0000     | 0.1078        | -0.1975       | 0.0000    |
| 2896 | 8083272 | GYG1         | 0.0000     | 0.0000        | 0.1974        | -0.0058   |
| 2897 | 8165658 | VIPR2        | 0.0000     | 0.0140        | 0.0000        | -0.1972   |
| 2898 | 8018315 | SUMO2        | 0.0000     | 0.0000        | 0.0000        | -0.1971   |
| 2899 | 8007493 | ARL4D        | 0.0227     | 0.0000        | 0.0000        | -0.1970   |
| 2900 | 7895538 | ---          | 0.0012     | 0.0000        | 0.0000        | -0.1970   |
| 2901 | 8005171 | TRPV2        | 0.1146     | -0.1969       | 0.0000        | 0.0000    |
| 2902 | 7893924 | ---          | 0.1944     | -0.0176       | -0.1969       | 0.0000    |
| 2903 | 8010161 | SEPT9        | -0.1969    | 0.0000        | 0.0000        | 0.1921    |
| 2904 | 8056047 | WDSUB1       | 0.0147     | 0.0000        | 0.0000        | -0.1969   |
| 2905 | 7895632 | ---          | 0.0343     | 0.0000        | 0.0000        | -0.1968   |
| 2906 | 8136652 | ---          | 0.0727     | 0.0000        | -0.1967       | 0.0000    |
| 2907 | 7895911 | ---          | -0.1967    | 0.0000        | 0.0000        | 0.0166    |
| 2908 | 7895332 | ---          | 0.0000     | 0.0000        | -0.1967       | 0.0000    |
| 2909 | 8133938 | CROT         | 0.0000     | 0.0000        | -0.1964       | 0.0863    |
| 2910 | 7895379 | ---          | 0.0000     | 0.1964        | 0.0000        | -0.1512   |
| 2911 | 8127072 | GSTA1        | 0.0000     | 0.0000        | -0.0026       | 0.1963    |
| 2912 | 8145532 | EPHX2        | -0.0190    | 0.0000        | 0.0000        | 0.1963    |

| #    | ID      | Name      | SDHB.score | SDHD-AT.score | SDHD-HN.score | VHL.score |
|------|---------|-----------|------------|---------------|---------------|-----------|
| 2913 | 8044818 | hCG_17324 | 0.0000     | 0.0000        | 0.0000        | 0.1961    |
| 2914 | 7917996 | LRRC39    | -0.1531    | 0.0000        | 0.0000        | 0.1961    |
| 2915 | 7913814 | SYF2      | -0.1960    | 0.0000        | 0.0000        | 0.0000    |
| 2916 | 7898574 | C1orf151  | -0.1959    | 0.0000        | 0.0000        | 0.0179    |
| 2917 | 8175609 | ---       | 0.0000     | 0.0000        | -0.1959       | 0.0000    |
| 2918 | 8032926 | PTPRS     | 0.0000     | 0.1302        | 0.0000        | -0.1959   |
| 2919 | 7904137 | HIPK1     | -0.1958    | 0.0000        | 0.0418        | 0.0000    |
| 2920 | 7977978 | EFS       | 0.0000     | -0.0962       | 0.0000        | 0.1958    |
| 2921 | 7897877 | TNFRSF1B  | -0.0918    | 0.0000        | 0.1956        | 0.0000    |
| 2922 | 7983191 | ADAL      | 0.0104     | 0.0000        | 0.0000        | -0.1956   |
| 2923 | 8115580 | PWWP2A    | 0.0000     | 0.0000        | -0.1021       | 0.1955    |
| 2924 | 8029914 | GPR77     | -0.1271    | -0.0253       | 0.0000        | 0.1955    |
| 2925 | 7940857 | STIP1     | 0.1955     | 0.0000        | -0.0887       | 0.0000    |
| 2926 | 7966172 | SVOP      | 0.0000     | 0.1776        | -0.1955       | 0.0000    |
| 2927 | 7987772 | EHD4      | -0.0499    | 0.0000        | 0.1954        | 0.0000    |
| 2928 | 8106602 | ZFYVE16   | -0.0574    | 0.0000        | 0.1952        | 0.0000    |
| 2929 | 8106325 | ANKDD1B   | 0.0000     | 0.0000        | 0.0000        | 0.1952    |
| 2930 | 8149707 | BIN3      | -0.0547    | 0.0000        | 0.0000        | 0.1951    |
| 2931 | 8143749 | ZNF467    | 0.0492     | 0.0000        | 0.0000        | -0.1950   |
| 2932 | 8149387 | FAM86B1   | 0.0446     | 0.0000        | 0.0000        | -0.1948   |
| 2933 | 8093906 | WFS1      | 0.0000     | 0.0000        | -0.1948       | 0.0535    |
| 2934 | 8083792 | ---       | 0.1947     | -0.1010       | 0.0000        | 0.0000    |
| 2935 | 7908388 | RGS1      | -0.1947    | 0.0000        | 0.1171        | 0.1511    |
| 2936 | 7894798 | ---       | 0.0000     | 0.0000        | -0.1946       | 0.0000    |
| 2937 | 7920492 | C1orf43   | 0.0597     | 0.0088        | 0.0000        | -0.1944   |
| 2938 | 8162313 | IARS      | 0.1405     | 0.0000        | 0.0000        | -0.1944   |
| 2939 | 8036276 | POLR2I    | 0.0000     | 0.1944        | 0.0000        | 0.0000    |
| 2940 | 7924058 | IRF6      | 0.0000     | 0.1943        | 0.0000        | 0.0000    |
| 2941 | 8102135 | CXXC4     | 0.0656     | 0.0000        | -0.1943       | 0.0000    |
| 2942 | 7896020 | ---       | 0.1942     | 0.0000        | 0.0000        | 0.0000    |
| 2943 | 8112521 | NAIP      | -0.1942    | 0.0000        | 0.0000        | 0.1842    |
| 2944 | 8108359 | REEP2     | 0.0077     | 0.1630        | 0.0000        | -0.1941   |
| 2945 | 7942889 | TMEM126A  | 0.1207     | 0.0000        | 0.0000        | -0.1941   |
| 2946 | 8068383 | CLIC6     | 0.0000     | 0.0000        | 0.1940        | 0.0000    |
| 2947 | 8151756 | TMEM55A   | 0.0000     | 0.0000        | 0.0000        | -0.1935   |
| 2948 | 7972601 | NALCN     | 0.0000     | 0.0000        | -0.1935       | 0.0000    |
| 2949 | 7979416 | TIMM9     | 0.0100     | 0.1203        | 0.0000        | -0.1933   |
| 2950 | 8047159 | ---       | -0.1017    | -0.1705       | 0.0368        | 0.1933    |
| 2951 | 7989759 | PARP16    | 0.0000     | 0.0000        | -0.1933       | 0.0000    |
| 2952 | 8168472 | ATP7A     | 0.1933     | 0.0000        | -0.1730       | -0.1003   |
| 2953 | 8119898 | VEGFA     | 0.0000     | 0.0000        | -0.1638       | 0.1932    |
| 2954 | 8153021 | ST3GAL1   | -0.1931    | 0.0000        | 0.1499        | 0.0857    |
| 2955 | 7904755 | PEX11B    | 0.0496     | 0.0000        | 0.0000        | -0.1930   |
| 2956 | 8090555 | H1FX      | 0.0000     | 0.0000        | 0.0000        | -0.1930   |
| 2957 | 7902771 | SH3GLB1   | -0.1930    | 0.0000        | 0.0359        | 0.0170    |
| 2958 | 8165735 | CSF2RA    | -0.1538    | 0.0000        | 0.1929        | 0.0124    |
| 2959 | 8165711 | PLCXD1    | 0.1929     | 0.0000        | 0.0000        | -0.0374   |
| 2960 | 8033190 | SLC25A23  | 0.0996     | 0.1929        | -0.0508       | -0.1922   |
| 2961 | 7894531 | ---       | 0.0000     | 0.0000        | -0.1929       | 0.0000    |
| 2962 | 8125434 | ---       | 0.0000     | 0.1923        | 0.0000        | 0.0000    |
| 2963 | 7915045 | C1orf109  | -0.0223    | 0.1923        | 0.0000        | 0.0000    |
| 2964 | 7967685 | STX2      | 0.0000     | -0.1781       | 0.0000        | 0.1922    |
| 2965 | 7895285 | ---       | -0.1922    | 0.0000        | 0.0000        | 0.1179    |
| 2966 | 8033960 | FDX1L     | 0.0000     | 0.1529        | 0.0000        | -0.1921   |
| 2967 | 8065469 | ABHD12    | 0.1148     | 0.0000        | 0.0000        | -0.1921   |
| 2968 | 8140752 | ABCB4     | -0.0378    | 0.0000        | 0.0000        | 0.1920    |
| 2969 | 8143461 | ---       | 0.0000     | 0.1920        | 0.0000        | -0.1811   |
| 2970 | 8034420 | MAN2B1    | 0.0000     | 0.0000        | 0.1919        | 0.0000    |
| 2971 | 7972487 | DOCK9     | -0.1612    | -0.0821       | 0.1069        | 0.1917    |
| 2972 | 7893603 | ---       | 0.1493     | 0.0000        | 0.0000        | -0.1917   |
| 2973 | 8092691 | BCL6      | -0.1432    | 0.0000        | 0.0000        | 0.1916    |
| 2974 | 8151512 | PAG1      | 0.0000     | 0.0993        | -0.1915       | 0.0000    |



| #    | ID      | Name          | SDHB.score | SDHD-AT.score | SDHD-HN.score | VHL.score |
|------|---------|---------------|------------|---------------|---------------|-----------|
| 2975 | 7951781 | C11orf71      | 0.1914     | 0.0000        | 0.0000        | 0.0000    |
| 2976 | 7986010 | IQGAP1        | -0.0286    | -0.1913       | 0.1251        | 0.0474    |
| 2977 | 7943721 | FDX1          | 0.0000     | 0.0000        | 0.0000        | 0.1913    |
| 2978 | 7915659 | HECTD3        | -0.1912    | 0.0000        | 0.0760        | 0.0000    |
| 2979 | 8091723 | RARRES1       | -0.0246    | 0.0000        | 0.1910        | 0.0000    |
| 2980 | 7902977 | KIAA1107      | 0.0000     | 0.1893        | -0.1910       | 0.0000    |
| 2981 | 7944285 | ARCN1         | 0.1909     | 0.0000        | 0.0000        | 0.0000    |
| 2982 | 7896378 | ---           | 0.0000     | 0.1909        | 0.0000        | -0.0936   |
| 2983 | 7918813 | NRAS          | -0.1909    | 0.0000        | 0.0550        | 0.0000    |
| 2984 | 7945182 | APLP2         | 0.1908     | -0.0498       | 0.0000        | -0.0090   |
| 2985 | 8137271 | ABP1          | 0.0000     | 0.0000        | 0.0000        | 0.1908    |
| 2986 | 8140113 | STX1A         | 0.1786     | 0.0045        | -0.0895       | -0.1908   |
| 2987 | 8135915 | C7orf68       | 0.0000     | 0.0000        | 0.0000        | 0.1906    |
| 2988 | 7916775 | ---           | -0.1906    | 0.0000        | 0.0403        | 0.0000    |
| 2989 | 8135969 | CCDC136       | 0.0000     | 0.0000        | -0.0524       | 0.1905    |
| 2990 | 8039713 | C19orf18      | -0.1069    | 0.0000        | 0.0000        | 0.1905    |
| 2991 | 7920258 | S100A6        | -0.1598    | 0.0000        | 0.1904        | 0.0000    |
| 2992 | 7914212 | SNORA61       | -0.1904    | 0.0000        | 0.0000        | 0.0377    |
| 2993 | 8172270 | ---           | -0.1420    | 0.0000        | 0.0000        | 0.1903    |
| 2994 | 8176026 | FLNA          | 0.0000     | -0.1902       | 0.1601        | 0.0000    |
| 2995 | 8165496 | TUBB2C        | 0.0000     | 0.0000        | -0.1902       | 0.0573    |
| 2996 | 7933733 | FAM13C        | -0.1846    | 0.0000        | 0.1901        | 0.1048    |
| 2997 | 7892690 | ---           | 0.0000     | 0.1901        | 0.0000        | -0.0322   |
| 2998 | 8126524 | C6orf108      | 0.1900     | 0.0000        | 0.0000        | -0.1688   |
| 2999 | 7916432 | DHCR24        | -0.1143    | 0.0000        | 0.0000        | 0.1900    |
| 3000 | 8131600 | TSPAN13       | 0.0000     | 0.1900        | 0.0000        | 0.0000    |
| 3001 | 7978201 | NEDD8         | 0.0000     | 0.1782        | 0.0000        | -0.1897   |
| 3002 | 7905054 | ---           | 0.0000     | 0.0000        | 0.1896        | 0.0000    |
| 3003 | 8092750 | FGF12         | -0.1896    | 0.0000        | 0.0000        | 0.0604    |
| 3004 | 8011713 | CXCL16        | 0.0000     | -0.0194       | 0.1894        | 0.0000    |
| 3005 | 8173179 | RP11-278E11.2 | 0.0000     | 0.1894        | 0.0000        | -0.0416   |
| 3006 | 7896295 | ---           | -0.1894    | 0.0000        | 0.0000        | 0.0641    |
| 3007 | 8051777 | COX7A2L       | 0.0432     | 0.0553        | 0.0000        | -0.1893   |
| 3008 | 7896722 | ---           | -0.1727    | -0.0429       | 0.1891        | 0.1390    |
| 3009 | 7917561 | GBP4          | -0.1890    | 0.0000        | 0.0000        | 0.1374    |
| 3010 | 7993310 | MKL2          | 0.0000     | 0.0000        | 0.1890        | 0.0000    |
| 3011 | 8046573 | MTX2          | 0.0000     | 0.1889        | 0.0000        | -0.0083   |
| 3012 | 7956785 | XPOT          | 0.0033     | 0.0000        | 0.0000        | -0.1889   |
| 3013 | 7893872 | ---           | 0.0000     | -0.1889       | 0.0000        | 0.0348    |
| 3014 | 8036557 | ---           | 0.0000     | 0.0000        | -0.1889       | 0.0000    |
| 3015 | 8154848 | PRSS3         | 0.0000     | 0.0000        | -0.1888       | 0.0000    |
| 3016 | 7907404 | C1orf9        | 0.0000     | 0.0000        | -0.1887       | 0.0000    |
| 3017 | 8163149 | PTPN3         | 0.0692     | 0.0000        | -0.1887       | 0.0000    |
| 3018 | 7954729 | FGD4          | -0.1885    | 0.0000        | 0.0582        | 0.1557    |
| 3019 | 8134384 | DYNC1I1       | 0.0000     | 0.0837        | 0.0000        | -0.1884   |
| 3020 | 7982751 | ---           | 0.0000     | 0.1884        | 0.0000        | 0.0000    |
| 3021 | 8130628 | AGPAT4        | 0.0000     | 0.0000        | 0.0000        | 0.1884    |
| 3022 | 7974270 | ATL1          | 0.0909     | 0.0000        | -0.1883       | 0.0000    |
| 3023 | 8079759 | BSN           | 0.1166     | 0.0000        | 0.0000        | -0.1883   |
| 3024 | 7976698 | EML1          | -0.0378    | 0.0000        | 0.0000        | 0.1883    |
| 3025 | 8014369 | CCL3          | -0.1883    | 0.0000        | 0.0927        | 0.0000    |
| 3026 | 8013262 | USP32         | 0.0587     | -0.1883       | 0.0000        | 0.0000    |
| 3027 | 7900009 | EIF2C4        | -0.1883    | 0.0000        | 0.0320        | 0.1055    |
| 3028 | 7895257 | ---           | 0.1681     | 0.0000        | 0.0000        | -0.1882   |
| 3029 | 7896033 | ---           | 0.0000     | -0.1882       | 0.0000        | 0.0000    |
| 3030 | 7895340 | ---           | 0.1880     | -0.1441       | 0.0000        | 0.0000    |
| 3031 | 8070330 | PSMG1         | 0.0121     | 0.0000        | 0.0000        | -0.1880   |
| 3032 | 8163629 | TNFSF8        | -0.0232    | 0.0000        | 0.1880        | 0.0000    |
| 3033 | 7894587 | ---           | -0.0958    | 0.0000        | 0.0000        | 0.1880    |
| 3034 | 8073430 | ACO2          | 0.0000     | 0.1879        | 0.0000        | -0.0895   |
| 3035 | 7919038 | WARS2         | -0.1879    | 0.0000        | 0.0000        | 0.0082    |
| 3036 | 7902396 | SNORD45C      | -0.1877    | 0.0000        | 0.0000        | 0.0000    |

| #    | ID      | Name      | SDHB.score | SDHD-AT.score | SDHD-HN.score | VHL.score |
|------|---------|-----------|------------|---------------|---------------|-----------|
| 3037 | 8034108 | YIPF2     | 0.0000     | 0.1877        | 0.0000        | -0.1058   |
| 3038 | 8084818 | CCDC50    | -0.0249    | 0.0000        | 0.1877        | 0.0000    |
| 3039 | 8171172 | MXRA5     | 0.0000     | -0.1601       | 0.1877        | 0.0000    |
| 3040 | 7951195 | ANGPTL5   | 0.0000     | 0.0000        | 0.1876        | 0.0000    |
| 3041 | 8111153 | MYO10     | -0.1657    | 0.0000        | 0.1876        | 0.1037    |
| 3042 | 7895350 | ---       | 0.0000     | -0.1875       | 0.0000        | 0.0000    |
| 3043 | 7918634 | PHTF1     | -0.1873    | 0.0000        | 0.0000        | 0.0715    |
| 3044 | 7942717 | MYO7A     | 0.0000     | 0.0000        | -0.1563       | 0.1873    |
| 3045 | 8149865 | EBF2      | -0.0258    | -0.0849       | 0.1873        | 0.0000    |
| 3046 | 7919669 | MTMR11    | 0.1873     | 0.0000        | 0.0000        | -0.1492   |
| 3047 | 7991049 | C15orf40  | 0.0000     | 0.1421        | 0.0000        | -0.1872   |
| 3048 | 7953943 | GABARAPL1 | 0.0000     | 0.1872        | 0.0000        | 0.0000    |
| 3049 | 7961022 | PTMA      | 0.0000     | 0.0000        | 0.1871        | 0.0000    |
| 3050 | 8079796 | RNF123    | 0.0000     | 0.0000        | 0.0000        | -0.1871   |
| 3051 | 8018786 | MXRA7     | 0.0329     | 0.0000        | -0.1870       | 0.0000    |
| 3052 | 8161488 | AQP7P1    | -0.0924    | 0.0000        | 0.0000        | 0.1869    |
| 3053 | 7946478 | DENND5A   | 0.0000     | -0.1869       | 0.0166        | 0.0000    |
| 3054 | 7943620 | ATM       | 0.0000     | -0.1869       | 0.0000        | 0.0000    |
| 3055 | 7944275 | TMEM25    | 0.1869     | 0.0000        | 0.0000        | -0.1561   |
| 3056 | 7903988 | RAP1A     | -0.1136    | 0.0000        | 0.1867        | 0.0000    |
| 3057 | 8119974 | SLC29A1   | 0.1393     | 0.0000        | -0.1867       | 0.0000    |
| 3058 | 8125748 | LYPLA2P1  | -0.1866    | 0.0000        | 0.0000        | 0.0000    |
| 3059 | 8170187 | CD40LG    | 0.0000     | 0.0000        | 0.1865        | 0.0000    |
| 3060 | 8113346 | ---       | 0.0000     | 0.1865        | 0.0000        | -0.1276   |
| 3061 | 8040802 | KHK       | 0.0840     | 0.0000        | 0.0000        | -0.1865   |
| 3062 | 7913450 | HSPG2     | -0.1408    | -0.1319       | 0.1865        | 0.1375    |
| 3063 | 7941460 | DRAP1     | 0.1766     | 0.0000        | 0.0000        | -0.1865   |
| 3064 | 7945296 | GLB1L3    | 0.1864     | 0.0000        | 0.0000        | 0.0000    |
| 3065 | 7960331 | NRIP2     | 0.0000     | 0.0000        | 0.0000        | 0.1864    |
| 3066 | 8070681 | C21orf84  | 0.0000     | 0.0000        | 0.0000        | 0.1863    |
| 3067 | 8078984 | RPL14     | 0.0000     | 0.0000        | 0.0000        | -0.1862   |
| 3068 | 7904364 | WDR3      | -0.1861    | 0.0000        | 0.0000        | 0.0000    |
| 3069 | 7989501 | CA12      | 0.0000     | 0.0000        | 0.1861        | 0.0000    |
| 3070 | 7991800 | ARHGDI3   | 0.0861     | 0.0000        | 0.0000        | -0.1860   |
| 3071 | 7894639 | ---       | 0.0114     | 0.0000        | 0.0000        | -0.1860   |
| 3072 | 8149720 | EGR3      | -0.1859    | 0.0000        | 0.1002        | 0.0669    |
| 3073 | 8130732 | BRP44L    | 0.0136     | 0.0000        | 0.0000        | -0.1859   |
| 3074 | 8001658 | C16orf80  | 0.0000     | 0.0000        | -0.1859       | 0.0000    |
| 3075 | 8105146 | MGC42105  | 0.0000     | 0.0000        | -0.1857       | 0.0000    |
| 3076 | 8066786 | ZMYND8    | 0.0000     | 0.0000        | -0.1857       | 0.0000    |
| 3077 | 8036055 | LGI4      | -0.1599    | 0.0000        | 0.1856        | 0.0447    |
| 3078 | 8157193 | ZNF483    | 0.0000     | 0.0000        | -0.1855       | 0.0000    |
| 3079 | 8061919 | CBFA2T2   | 0.0515     | 0.0000        | -0.1855       | 0.0000    |
| 3080 | 8067626 | KCNQ2     | 0.1642     | 0.0000        | 0.0000        | -0.1855   |
| 3081 | 8175369 | MAP7D3    | 0.0000     | 0.0000        | 0.1855        | 0.0000    |
| 3082 | 8058837 | PECR      | 0.0953     | 0.1721        | -0.0364       | -0.1854   |
| 3083 | 8116372 | RNF130    | -0.0099    | 0.0000        | 0.1853        | 0.0000    |
| 3084 | 8007302 | TUBG1     | 0.1248     | 0.0000        | 0.0000        | -0.1853   |
| 3085 | 8117377 | HIST1H1E  | 0.0000     | 0.0000        | 0.0000        | -0.1852   |
| 3086 | 7903586 | TMEM167B  | -0.1613    | 0.1852        | 0.0000        | 0.0000    |
| 3087 | 8027354 | RPSAP58   | 0.0134     | 0.0000        | -0.1851       | 0.0000    |
| 3088 | 8049301 | SAG       | 0.0000     | 0.0000        | 0.1851        | 0.0000    |
| 3089 | 7894226 | ---       | 0.0000     | 0.0000        | -0.1851       | 0.0000    |
| 3090 | 7895472 | ---       | 0.0701     | 0.1090        | 0.0000        | -0.1850   |
| 3091 | 7996081 | GPR56     | -0.1849    | 0.0000        | 0.0712        | 0.1293    |
| 3092 | 8152900 | ---       | 0.0000     | -0.1848       | 0.0000        | 0.0303    |
| 3093 | 7975799 | FLVCR2    | -0.0952    | -0.0371       | 0.0000        | 0.1848    |
| 3094 | 8053551 | REEP1     | 0.0238     | 0.0000        | -0.1847       | 0.0000    |
| 3095 | 7923976 | ---       | 0.0000     | 0.0000        | -0.1207       | 0.1847    |
| 3096 | 8030220 | PPFIA3    | 0.0000     | 0.0000        | -0.1847       | 0.0000    |
| 3097 | 7946807 | RPL36A    | 0.0000     | 0.1847        | 0.0000        | -0.1252   |
| 3098 | 7904907 | BCL9      | 0.1845     | 0.0000        | -0.0692       | -0.0497   |

| #    | ID      | Name        | SDHB.score | SDHD-AT.score | SDHD-HN.score | VHL.score |
|------|---------|-------------|------------|---------------|---------------|-----------|
| 3099 | 8091503 | GPR171      | 0.0000     | 0.0000        | 0.1845        | 0.0000    |
| 3100 | 7903022 | SNORD21     | -0.1843    | 0.0000        | 0.0000        | 0.0061    |
| 3101 | 8069574 | C21orf91    | -0.0319    | 0.0000        | 0.1843        | 0.0000    |
| 3102 | 7896651 | ---         | -0.1618    | 0.1843        | 0.0000        | 0.0000    |
| 3103 | 8045860 | PKP4        | 0.0000     | 0.0000        | 0.1843        | -0.0778   |
| 3104 | 7892826 | ---         | -0.1678    | 0.0000        | 0.0000        | 0.1842    |
| 3105 | 8052925 | TEX261      | 0.0000     | 0.1842        | 0.0000        | -0.0265   |
| 3106 | 8155442 | AQP7P1      | -0.0933    | 0.0000        | 0.0000        | 0.1841    |
| 3107 | 7900183 | MANEAL      | 0.0000     | 0.1840        | -0.0844       | 0.0000    |
| 3108 | 8056930 | ATP5G3      | 0.0000     | 0.1368        | 0.0000        | -0.1840   |
| 3109 | 7915101 | INPP5B      | -0.1839    | 0.0000        | 0.0000        | 0.0000    |
| 3110 | 7913319 | EIF4G3      | -0.1839    | 0.0000        | 0.0000        | 0.0000    |
| 3111 | 7895289 | ---         | 0.1259     | -0.1839       | 0.0000        | 0.0000    |
| 3112 | 7963289 | BIN2        | -0.0659    | 0.0000        | 0.1838        | 0.0000    |
| 3113 | 7937892 | PGAP2       | 0.1838     | 0.0000        | 0.0000        | -0.0954   |
| 3114 | 7896748 | ---         | 0.0000     | 0.0485        | 0.0000        | -0.1838   |
| 3115 | 8172708 | NUDT11      | 0.0475     | 0.0000        | -0.1834       | 0.0000    |
| 3116 | 7981364 | CINP        | 0.0393     | 0.0000        | 0.0000        | -0.1833   |
| 3117 | 7903308 | CCDC76      | -0.1833    | 0.0000        | 0.0000        | 0.0000    |
| 3118 | 8112139 | IL6ST       | -0.1168    | -0.0346       | 0.1832        | 0.0615    |
| 3119 | 8136067 | TSPAN33     | 0.0000     | 0.0257        | 0.0000        | -0.1831   |
| 3120 | 8008664 | AKAP1       | 0.0000     | 0.0000        | 0.0000        | -0.1831   |
| 3121 | 8108378 | CTNNA1      | 0.0000     | -0.1831       | 0.0000        | 0.0000    |
| 3122 | 7925056 | ---         | 0.0000     | -0.0362       | 0.0000        | 0.1830    |
| 3123 | 7989309 | ---         | -0.1829    | 0.0000        | 0.0000        | 0.1286    |
| 3124 | 8133721 | HSPB1       | -0.1829    | 0.0000        | 0.0047        | 0.1154    |
| 3125 | 7896583 | ---         | 0.0000     | -0.1828       | 0.0000        | 0.0000    |
| 3126 | 7929882 | SEMA4G      | 0.1826     | 0.0000        | 0.0000        | -0.0406   |
| 3127 | 8172204 | MAOB        | -0.0237    | 0.0000        | 0.0000        | 0.1826    |
| 3128 | 7898278 | SPEN        | -0.0806    | 0.0000        | 0.0000        | 0.1826    |
| 3129 | 8110022 | ATP6V0E1    | 0.0000     | 0.0872        | 0.0000        | -0.1825   |
| 3130 | 8004571 | EFNB3       | 0.0000     | 0.0000        | 0.1522        | -0.1825   |
| 3131 | 7896613 | ---         | 0.0000     | -0.1824       | 0.0000        | 0.0000    |
| 3132 | 8003859 | ---         | 0.1036     | 0.0000        | 0.0000        | -0.1822   |
| 3133 | 7956159 | RPL41       | 0.0000     | 0.1822        | 0.0000        | -0.0342   |
| 3134 | 8000156 | SMG1        | 0.0000     | -0.1822       | 0.0000        | 0.1204    |
| 3135 | 7927747 | ZNF365      | 0.0840     | 0.0000        | 0.0000        | -0.1822   |
| 3136 | 7933092 | ZNF248      | 0.0000     | 0.0000        | -0.1821       | 0.0000    |
| 3137 | 8112728 | hCG_1757335 | -0.0481    | 0.0000        | 0.1820        | 0.0000    |
| 3138 | 7917331 | C1orf52     | -0.1820    | 0.0000        | 0.0000        | 0.0882    |
| 3139 | 8100312 | LRRRC66     | -0.0135    | 0.0000        | 0.0000        | 0.1820    |
| 3140 | 8055350 | TMEM163     | 0.0683     | 0.0000        | 0.0030        | -0.1820   |
| 3141 | 8180222 | ---         | 0.0000     | 0.0000        | 0.1819        | 0.0000    |
| 3142 | 7925229 | B3GALNT2    | 0.1818     | 0.0000        | -0.0165       | 0.0000    |
| 3143 | 7893098 | ---         | 0.0000     | -0.0699       | 0.0000        | 0.1817    |
| 3144 | 7893775 | ---         | 0.0418     | 0.0000        | 0.0000        | -0.1817   |
| 3145 | 8128939 | TRAF3IP2    | 0.0000     | -0.1816       | 0.0000        | 0.1666    |
| 3146 | 7899173 | DHDDS       | -0.1815    | 0.0000        | 0.0000        | 0.0290    |
| 3147 | 7950838 | PICALM      | 0.0000     | -0.0077       | 0.1813        | 0.0000    |
| 3148 | 8042310 | SLC1A4      | 0.1217     | 0.0000        | -0.1813       | 0.0000    |
| 3149 | 8104930 | SLC1A3      | -0.1137    | 0.0000        | 0.1812        | 0.0000    |
| 3150 | 8047538 | BMPR2       | -0.0123    | 0.0000        | 0.1812        | 0.0000    |
| 3151 | 8040698 | C2orf18     | 0.0616     | 0.0000        | 0.0000        | -0.1812   |
| 3152 | 8013015 | CENPV       | 0.1810     | 0.0000        | -0.1630       | -0.0544   |
| 3153 | 7944978 | EI24        | 0.1810     | 0.0000        | 0.0000        | -0.1421   |
| 3154 | 8038078 | KDELRL1     | 0.0000     | 0.1305        | 0.0000        | -0.1810   |
| 3155 | 7893769 | ---         | 0.0000     | 0.0000        | -0.1810       | 0.0000    |
| 3156 | 8031238 | LILRB4      | 0.0000     | 0.0000        | 0.1810        | 0.0000    |
| 3157 | 8161270 | ANKRD18A    | 0.0000     | 0.0000        | -0.1809       | 0.0000    |
| 3158 | 7915425 | ZMYND12     | 0.0000     | 0.1807        | -0.0144       | 0.0000    |
| 3159 | 8173232 | FAM123B     | 0.0628     | 0.0000        | -0.1807       | 0.0000    |
| 3160 | 7939825 | NDUFS3      | 0.0321     | 0.0000        | 0.0000        | -0.1806   |

| #    | ID      | Name      | SDHB.score | SDHD-AT.score | SDHD-HN.score | VHL.score |
|------|---------|-----------|------------|---------------|---------------|-----------|
| 3161 | 7892541 | ---       | 0.0000     | 0.1806        | 0.0000        | -0.0259   |
| 3162 | 8008388 | SPATA20   | 0.1806     | 0.0000        | -0.1243       | -0.0132   |
| 3163 | 7916372 | TMEM59    | -0.1806    | 0.1020        | 0.0000        | 0.0396    |
| 3164 | 8051622 | SFRS7     | -0.1702    | 0.0000        | 0.0000        | 0.1806    |
| 3165 | 8019687 | ANAPC11   | 0.0000     | 0.0557        | 0.0000        | -0.1806   |
| 3166 | 8083090 | ZBTB38    | -0.1419    | 0.0000        | 0.0000        | 0.1805    |
| 3167 | 7911559 | MRPL20    | -0.1805    | 0.0903        | 0.0000        | 0.0000    |
| 3168 | 7989315 | GTF2A2    | 0.0000     | 0.1805        | 0.0000        | -0.1030   |
| 3169 | 8165653 | HNRNPM    | 0.0000     | 0.0363        | 0.0000        | -0.1804   |
| 3170 | 7954055 | APOLD1    | -0.1533    | 0.0000        | 0.0000        | 0.1804    |
| 3171 | 8079346 | SACM1L    | 0.0000     | 0.0000        | 0.0000        | -0.1804   |
| 3172 | 7975602 | ACOT2     | 0.0000     | 0.0000        | -0.1803       | 0.0000    |
| 3173 | 7955578 | GRASP     | -0.1803    | 0.0000        | 0.0101        | 0.1405    |
| 3174 | 8099099 | TMEM128   | 0.0000     | 0.1803        | 0.0000        | -0.1131   |
| 3175 | 8165183 | SEC16A    | 0.0000     | 0.0000        | -0.0018       | 0.1802    |
| 3176 | 8044965 | TSN       | 0.0000     | 0.1802        | 0.0000        | -0.0606   |
| 3177 | 8050160 | MBOAT2    | 0.1802     | 0.0000        | -0.1074       | 0.0000    |
| 3178 | 8004431 | POLR2A    | 0.0000     | -0.1780       | 0.0000        | 0.1801    |
| 3179 | 8140500 | TMEM60    | 0.1351     | 0.0000        | 0.0000        | -0.1801   |
| 3180 | 7894503 | ---       | 0.0000     | -0.1801       | 0.0000        | 0.0579    |
| 3181 | 7914834 | PSMB2     | -0.1365    | 0.1800        | 0.0000        | 0.0000    |
| 3182 | 7914282 | SDC3      | -0.1426    | 0.0000        | 0.0000        | 0.1799    |
| 3183 | 8091546 | TMEM14E   | 0.0000     | 0.0000        | 0.1799        | 0.0000    |
| 3184 | 8119159 | ---       | 0.0000     | 0.1799        | 0.0000        | -0.0365   |
| 3185 | 7950307 | UCP2      | -0.0932    | 0.0000        | 0.1796        | 0.0000    |
| 3186 | 8135480 | DNAJB9    | 0.1082     | 0.0000        | -0.1796       | 0.0000    |
| 3187 | 7895209 | ---       | 0.0000     | -0.0461       | 0.0000        | 0.1795    |
| 3188 | 7899392 | SCARNA1   | -0.1795    | 0.0640        | 0.0000        | 0.0000    |
| 3189 | 7896503 | ---       | 0.0000     | 0.0000        | 0.0000        | -0.1794   |
| 3190 | 7948798 | BSCL2     | 0.1123     | 0.0000        | -0.1794       | 0.0000    |
| 3191 | 8079563 | DHX30     | 0.0190     | 0.0000        | 0.0000        | -0.1793   |
| 3192 | 8002333 | SMG1      | 0.0000     | -0.1793       | 0.0000        | 0.1212    |
| 3193 | 8169389 | PAK3      | 0.0000     | 0.0504        | -0.1793       | 0.0000    |
| 3194 | 8020384 | KIAA1772  | 0.0000     | 0.1002        | 0.0000        | -0.1793   |
| 3195 | 7893455 | ---       | 0.0000     | 0.1793        | 0.0000        | -0.0526   |
| 3196 | 8105852 | MRPS36    | 0.0000     | 0.0596        | 0.0000        | -0.1792   |
| 3197 | 8087145 | CELSR3    | 0.1792     | 0.0000        | -0.1609       | 0.0000    |
| 3198 | 8082165 | KALRN     | -0.0875    | -0.1293       | 0.0000        | 0.1792    |
| 3199 | 8005689 | LOC220594 | 0.1181     | -0.1792       | 0.0000        | 0.0000    |
| 3200 | 8112478 | NAIP      | -0.1792    | 0.0000        | 0.0000        | 0.1727    |
| 3201 | 8000636 | NPIPL3    | 0.0000     | -0.1752       | 0.0000        | 0.1792    |
| 3202 | 8061564 | ID1       | -0.1791    | 0.0718        | 0.1697        | 0.0000    |
| 3203 | 8139656 | GRB10     | -0.1791    | 0.0000        | 0.0978        | 0.0255    |
| 3204 | 7991034 | HOMER2    | 0.1455     | 0.0000        | -0.1790       | 0.0000    |
| 3205 | 7961365 | MANSC1    | 0.0000     | 0.0000        | 0.0000        | -0.1789   |
| 3206 | 8043441 | ---       | 0.0000     | -0.1789       | 0.1592        | 0.0000    |
| 3207 | 7898328 | C1orf144  | -0.1789    | 0.0000        | 0.1347        | 0.0000    |
| 3208 | 8043278 | MRPL35    | 0.0997     | 0.0000        | 0.0000        | -0.1788   |
| 3209 | 8168843 | RPL36A    | 0.0000     | 0.1788        | 0.0000        | -0.0791   |
| 3210 | 8005557 | EPN2      | 0.0000     | -0.1787       | 0.0000        | 0.0107    |
| 3211 | 7906602 | VANGL2    | 0.0000     | 0.0000        | -0.1786       | 0.0440    |
| 3212 | 7931951 | SFMBT2    | -0.1786    | 0.0000        | 0.0207        | 0.1527    |
| 3213 | 8119882 | RSPH9     | 0.0000     | 0.0000        | -0.0735       | 0.1786    |
| 3214 | 8163825 | TRAF1     | -0.0928    | -0.0040       | 0.0000        | 0.1785    |
| 3215 | 7906969 | ---       | 0.0000     | 0.0000        | 0.0000        | 0.1785    |
| 3216 | 8073343 | ---       | 0.0000     | 0.1785        | 0.0000        | 0.0000    |
| 3217 | 7941511 | SF3B2     | 0.1785     | 0.0000        | 0.0000        | 0.0000    |
| 3218 | 7946563 | ---       | 0.0000     | 0.0000        | 0.0000        | 0.1785    |
| 3219 | 7956826 | TBC1D30   | -0.1066    | 0.0000        | 0.0000        | 0.1785    |
| 3220 | 7970082 | ---       | -0.1184    | -0.1784       | 0.1253        | 0.1656    |
| 3221 | 8077993 | TMEM43    | 0.0000     | 0.0000        | 0.1783        | -0.0672   |
| 3222 | 8018343 | MIF4GD    | 0.0054     | 0.0000        | 0.0000        | -0.1782   |

| #    | ID      | Name         | SDHB.score | SDHD-AT.score | SDHD-HN.score | VHL.score |
|------|---------|--------------|------------|---------------|---------------|-----------|
| 3223 | 7953442 | GPR162       | 0.0161     | 0.1053        | 0.0000        | -0.1782   |
| 3224 | 7932794 | ---          | 0.0000     | 0.1781        | 0.0000        | 0.0000    |
| 3225 | 8089596 | WDR52        | -0.1780    | 0.0000        | 0.0000        | 0.0407    |
| 3226 | 8043993 | UNQ9419      | -0.1511    | 0.0000        | 0.1780        | 0.0322    |
| 3227 | 8090960 | DBR1         | 0.0000     | 0.0000        | 0.0000        | -0.1780   |
| 3228 | 7899534 | EPB41        | 0.0000     | 0.1780        | 0.0000        | 0.0000    |
| 3229 | 8026063 | MAST1        | 0.0000     | 0.0000        | -0.1779       | 0.0000    |
| 3230 | 7939197 | HIPK3        | 0.0000     | 0.0000        | 0.1778        | 0.0000    |
| 3231 | 7952950 | LOC100049716 | -0.0347    | 0.0000        | 0.0000        | 0.1776    |
| 3232 | 7983512 | SQRDL        | -0.1776    | 0.0000        | 0.1717        | 0.0000    |
| 3233 | 8096744 | CYP2U1       | 0.0987     | 0.0000        | 0.0000        | -0.1776   |
| 3234 | 8055702 | NMI          | -0.0733    | 0.0000        | 0.1776        | 0.0000    |
| 3235 | 8010061 | SPHK1        | 0.0000     | 0.0000        | 0.1776        | 0.0000    |
| 3236 | 7958414 | ISCU         | 0.0000     | 0.0000        | 0.0000        | -0.1775   |
| 3237 | 8020650 | ---          | 0.0110     | -0.1129       | -0.1775       | 0.0093    |
| 3238 | 7902634 | BXDC5        | -0.1774    | 0.0000        | 0.0000        | 0.0000    |
| 3239 | 7970892 | N4BP2L1      | 0.0000     | 0.0000        | 0.0000        | 0.1773    |
| 3240 | 7895090 | ---          | 0.0000     | 0.1772        | 0.0000        | -0.0857   |
| 3241 | 8087473 | IP6K1        | 0.0653     | 0.0000        | 0.0000        | -0.1772   |
| 3242 | 8145766 | MST131       | 0.0201     | -0.1772       | 0.0000        | 0.0000    |
| 3243 | 8005231 | FAM106A      | 0.0000     | -0.1772       | 0.0000        | 0.0000    |
| 3244 | 8143879 | TMUB1        | 0.0982     | 0.0000        | -0.1771       | 0.0000    |
| 3245 | 7921155 | INSRR        | 0.1053     | 0.0000        | -0.1771       | 0.0000    |
| 3246 | 8150186 | RNF122       | -0.0996    | 0.0000        | 0.0000        | 0.1771    |
| 3247 | 7894786 | ---          | 0.0338     | 0.0000        | 0.0000        | -0.1769   |
| 3248 | 8123864 | TFAP2A       | -0.0367    | 0.0000        | 0.1768        | 0.0000    |
| 3249 | 7979615 | SPTB         | 0.0000     | 0.0000        | -0.1768       | 0.0000    |
| 3250 | 7914296 | PUM1         | -0.1767    | 0.0000        | 0.0000        | 0.1679    |
| 3251 | 8101237 | PAQR3        | 0.0000     | 0.0000        | 0.0000        | -0.1767   |
| 3252 | 8030277 | CD37         | -0.0069    | 0.0000        | 0.1765        | 0.0000    |
| 3253 | 7975081 | C14orf50     | 0.0000     | 0.0000        | 0.0000        | 0.1765    |
| 3254 | 7971197 | ELF1         | -0.1765    | -0.0251       | 0.1392        | 0.1668    |
| 3255 | 8063442 | ---          | -0.1763    | 0.0000        | 0.0000        | 0.1720    |
| 3256 | 7892938 | ---          | 0.0000     | 0.0000        | 0.0000        | 0.1763    |
| 3257 | 7971653 | DLEU2        | 0.0000     | 0.0000        | 0.1763        | 0.0000    |
| 3258 | 8143270 | ZC3HAV1L     | 0.0000     | 0.0000        | -0.1763       | 0.0000    |
| 3259 | 8166714 | LANCL3       | 0.0000     | 0.0000        | 0.0000        | -0.1762   |
| 3260 | 8076461 | ---          | 0.0000     | 0.1762        | 0.0000        | -0.1402   |
| 3261 | 8076417 | NDUFA6       | 0.0000     | 0.1762        | 0.0000        | -0.0186   |
| 3262 | 8016870 | MRPS23       | 0.0000     | 0.0224        | 0.0000        | -0.1762   |
| 3263 | 8021208 | ME2          | 0.1761     | 0.0000        | 0.0000        | -0.1027   |
| 3264 | 8005994 | ERAL1        | 0.0000     | 0.1701        | 0.0000        | -0.1761   |
| 3265 | 8103853 | MGC45800     | 0.0000     | 0.0000        | -0.1360       | 0.1761    |
| 3266 | 8117343 | HFE          | -0.1760    | 0.0000        | 0.1196        | 0.0672    |
| 3267 | 8003769 | ---          | 0.0000     | -0.1760       | 0.0000        | 0.0000    |
| 3268 | 7960771 | CD163L1      | -0.1759    | -0.0444       | 0.1680        | 0.1572    |
| 3269 | 7954511 | STK38L       | 0.0000     | 0.0000        | 0.1758        | 0.0000    |
| 3270 | 7896197 | ---          | 0.0000     | 0.1757        | 0.0000        | -0.1201   |
| 3271 | 8022941 | C18orf10     | 0.0000     | 0.1755        | 0.0000        | -0.1139   |
| 3272 | 7952813 | IGSF9B       | 0.1755     | 0.0000        | -0.1354       | 0.0000    |
| 3273 | 8079707 | NDUFAF3      | 0.0291     | 0.0000        | 0.0000        | -0.1755   |
| 3274 | 8140020 | NSUN5        | 0.1755     | 0.0000        | -0.1282       | -0.0262   |
| 3275 | 8176174 | MPP1         | 0.0000     | 0.0000        | -0.0938       | 0.1754    |
| 3276 | 7895790 | ---          | -0.0569    | 0.0000        | 0.0000        | 0.1754    |
| 3277 | 7906417 | CADM3        | 0.0000     | 0.0000        | 0.0000        | 0.1752    |
| 3278 | 8111569 | RANBP3L      | 0.0000     | 0.0000        | 0.0757        | -0.1752   |
| 3279 | 7941563 | ---          | 0.0000     | -0.1751       | 0.0000        | 0.0227    |
| 3280 | 8087308 | USP19        | 0.0000     | 0.0000        | 0.0000        | -0.1749   |
| 3281 | 8169061 | PLP1         | -0.1749    | 0.0000        | 0.0245        | 0.0718    |
| 3282 | 7917359 | ZNHIT6       | -0.1749    | 0.0000        | 0.0430        | 0.0513    |
| 3283 | 8105229 | PELO         | -0.0443    | -0.0328       | 0.0000        | 0.1749    |
| 3284 | 8106923 | NR2F1        | -0.0604    | 0.0000        | 0.0000        | 0.1748    |

| #    | ID      | Name     | SDHB.score | SDHD-AT.score | SDHD-HN.score | VHL.score |
|------|---------|----------|------------|---------------|---------------|-----------|
| 3285 | 8007355 | VPS25    | 0.0000     | 0.1218        | 0.0000        | -0.1747   |
| 3286 | 8064218 | PRPF6    | 0.1747     | 0.0000        | 0.0000        | 0.0000    |
| 3287 | 8035795 | ZNF626   | 0.0000     | 0.1746        | 0.0000        | -0.0111   |
| 3288 | 7900119 | THRAP3   | -0.1745    | 0.0000        | 0.0000        | 0.1385    |
| 3289 | 8145669 | RBPM5    | 0.0000     | -0.1744       | 0.1133        | 0.0000    |
| 3290 | 8081959 | STXBP5L  | 0.0621     | 0.1744        | -0.0758       | -0.1163   |
| 3291 | 8014100 | C17orf75 | 0.0000     | 0.1744        | 0.0000        | -0.0915   |
| 3292 | 8120833 | SH3BGRL2 | 0.0000     | 0.0000        | 0.0000        | -0.1743   |
| 3293 | 7936115 | SH3PXD2A | 0.0000     | -0.1741       | 0.0000        | 0.0084    |
| 3294 | 7957404 | C12orf26 | -0.1741    | 0.0036        | 0.0000        | 0.0000    |
| 3295 | 7893271 | ---      | 0.0448     | -0.1741       | 0.0000        | 0.0000    |
| 3296 | 8020647 | TTC39C   | 0.0000     | 0.0000        | -0.1740       | 0.0000    |
| 3297 | 8078272 | NR1D2    | 0.0052     | 0.0000        | 0.0000        | -0.1740   |
| 3298 | 7893876 | ---      | 0.0000     | -0.0560       | 0.0000        | 0.1740    |
| 3299 | 7894284 | ---      | 0.0000     | 0.0000        | 0.0000        | -0.1739   |
| 3300 | 8077858 | ATG7     | -0.0432    | 0.0000        | 0.1739        | 0.0000    |
| 3301 | 8088602 | MAG11    | -0.0830    | -0.0223       | 0.0000        | 0.1738    |
| 3302 | 8100154 | CORIN    | 0.0000     | -0.1416       | 0.0000        | 0.1738    |
| 3303 | 7978666 | MBIP     | 0.0000     | 0.1738        | 0.0000        | -0.0129   |
| 3304 | 8025199 | PNPLA6   | 0.0000     | 0.1737        | 0.0000        | -0.1033   |
| 3305 | 8016412 | ---      | 0.1737     | 0.0000        | 0.0000        | -0.1391   |
| 3306 | 8180361 | ---      | 0.0000     | 0.1737        | 0.0000        | 0.0000    |
| 3307 | 7899654 | KHDRBS1  | -0.1737    | 0.0000        | 0.0000        | 0.0727    |
| 3308 | 8167912 | KLF8     | 0.0000     | 0.0000        | 0.1737        | 0.0000    |
| 3309 | 8049544 | LRRFIP1  | -0.1001    | 0.0000        | 0.0000        | 0.1736    |
| 3310 | 8086961 | PFKFB4   | 0.0000     | 0.0000        | 0.0000        | 0.1735    |
| 3311 | 8116859 | TMEM14C  | 0.0000     | 0.0000        | 0.0000        | -0.1735   |
| 3312 | 7899029 | MAN1C1   | -0.0485    | 0.0000        | 0.1734        | 0.0000    |
| 3313 | 7893886 | ---      | 0.0000     | 0.0000        | -0.1734       | 0.0000    |
| 3314 | 7938816 | ZDHHC13  | 0.0000     | 0.0000        | 0.0000        | -0.1734   |
| 3315 | 7959025 | RNFT2    | 0.0396     | 0.1260        | 0.0000        | -0.1732   |
| 3316 | 7895056 | ---      | 0.1731     | 0.0000        | 0.0000        | -0.0025   |
| 3317 | 8131096 | ELFN1    | 0.0000     | -0.1004       | 0.0000        | 0.1731    |
| 3318 | 8123767 | SSR1     | 0.0589     | 0.0000        | 0.0000        | -0.1731   |
| 3319 | 8129888 | NHSL1    | -0.1493    | 0.0000        | 0.1731        | 0.0616    |
| 3320 | 7981142 | CLMN     | -0.0292    | 0.0000        | 0.0000        | 0.1730    |
| 3321 | 7928819 | ---      | 0.0000     | 0.0000        | -0.1730       | 0.0000    |
| 3322 | 8019183 | ACTG1    | 0.0000     | -0.1729       | 0.0000        | 0.0000    |
| 3323 | 8005547 | SNORD3A  | -0.1207    | 0.0000        | 0.0000        | 0.1729    |
| 3324 | 8089743 | B4GALT4  | 0.0000     | 0.0000        | 0.0000        | -0.1728   |
| 3325 | 7984932 | SCAMP5   | 0.0000     | 0.1683        | 0.0000        | -0.1727   |
| 3326 | 8151191 | CPA6     | 0.0000     | 0.0000        | 0.1727        | 0.0000    |
| 3327 | 8019563 | MGC70870 | 0.0000     | 0.1727        | 0.0000        | -0.0158   |
| 3328 | 8112881 | ---      | -0.0723    | -0.1117       | 0.0000        | 0.1726    |
| 3329 | 8138862 | ---      | -0.0627    | 0.0000        | 0.0000        | 0.1726    |
| 3330 | 7915147 | FHL3     | 0.0000     | 0.0000        | 0.1725        | 0.0000    |
| 3331 | 8094759 | NSUN7    | 0.0000     | 0.0000        | -0.1725       | 0.0000    |
| 3332 | 8009913 | MYO15B   | -0.1724    | 0.0000        | 0.1694        | 0.0801    |
| 3333 | 8166469 | SAT1     | -0.1724    | 0.0000        | 0.1158        | 0.0653    |
| 3334 | 7903203 | SNX7     | -0.1724    | 0.0000        | 0.0000        | 0.0261    |
| 3335 | 7951633 | ALG9     | 0.1723     | 0.0000        | -0.0790       | 0.0000    |
| 3336 | 8146839 | C8orf34  | 0.1723     | 0.0000        | 0.0000        | -0.0663   |
| 3337 | 8046560 | HOXD3    | 0.0000     | 0.0000        | -0.1722       | 0.0000    |
| 3338 | 7911038 | ZNF238   | 0.0506     | 0.0000        | 0.0000        | -0.1722   |
| 3339 | 7914887 | TRAPPC3  | -0.1114    | 0.1721        | 0.0000        | 0.0000    |
| 3340 | 7894431 | ---      | 0.0802     | -0.1720       | 0.0000        | 0.0000    |
| 3341 | 8016128 | GFAP     | 0.0000     | 0.0000        | 0.1719        | 0.0000    |
| 3342 | 7895528 | ---      | 0.0000     | -0.1719       | 0.0000        | 0.0663    |
| 3343 | 7984259 | RNU5B-1  | -0.0241    | 0.1717        | 0.0000        | 0.0000    |
| 3344 | 7979943 | MAP3K9   | 0.1716     | 0.0000        | -0.0934       | 0.0000    |
| 3345 | 8056363 | SLC38A11 | -0.0950    | -0.0715       | 0.0000        | 0.1716    |
| 3346 | 8002618 | ZNF821   | 0.1110     | 0.0000        | 0.0000        | -0.1716   |

| #    | ID      | Name     | SDHB.score | SDHD-AT.score | SDHD-HN.score | VHL.score |
|------|---------|----------|------------|---------------|---------------|-----------|
| 3347 | 7948332 | LPXN     | 0.0000     | 0.0000        | 0.1714        | 0.0000    |
| 3348 | 8037621 | EML2     | 0.0000     | 0.1714        | 0.0000        | 0.0000    |
| 3349 | 7895817 | ---      | 0.0000     | 0.0000        | 0.0000        | -0.1714   |
| 3350 | 7929732 | CNNM1    | -0.0237    | 0.1714        | 0.0000        | 0.0000    |
| 3351 | 8090872 | KY       | 0.0000     | 0.0000        | -0.1015       | 0.1713    |
| 3352 | 8027642 | PDCD2L   | 0.0486     | 0.0000        | 0.0000        | -0.1713   |
| 3353 | 7895450 | ---      | 0.0000     | -0.1712       | 0.0000        | 0.0000    |
| 3354 | 7960514 | ---      | 0.0000     | 0.0000        | 0.0000        | 0.1711    |
| 3355 | 7943293 | ENDOD1   | 0.0000     | -0.1711       | 0.0000        | 0.0000    |
| 3356 | 7944970 | ---      | 0.0000     | -0.1711       | 0.0000        | 0.0000    |
| 3357 | 7949377 | FAU      | 0.1337     | 0.0000        | 0.0000        | -0.1710   |
| 3358 | 7916403 | SSBP3    | -0.0488    | 0.0331        | -0.1131       | 0.1709    |
| 3359 | 7999317 | TMEM186  | 0.0629     | 0.0000        | 0.0000        | -0.1709   |
| 3360 | 8016825 | COX11    | 0.0000     | 0.1007        | 0.0000        | -0.1708   |
| 3361 | 7911578 | CDC2L2   | -0.1526    | 0.0000        | 0.0000        | 0.1708    |
| 3362 | 7967987 | MRP63    | 0.0000     | 0.1708        | 0.0000        | -0.0386   |
| 3363 | 8112902 | DHFR     | 0.0000     | 0.0000        | 0.0000        | -0.1708   |
| 3364 | 8133122 | ASL      | 0.0539     | 0.0000        | -0.1707       | 0.0000    |
| 3365 | 8037695 | SYMPK    | 0.0742     | 0.0000        | 0.0000        | -0.1707   |
| 3366 | 8038624 | C19orf48 | 0.0000     | 0.0000        | 0.0799        | -0.1706   |
| 3367 | 7945803 | CARS     | 0.0217     | 0.0000        | 0.0000        | -0.1705   |
| 3368 | 8040103 | ID2      | -0.1704    | 0.1431        | 0.0000        | 0.0000    |
| 3369 | 8089714 | LSAMP    | 0.0125     | 0.0000        | -0.1703       | 0.0000    |
| 3370 | 7894146 | ---      | 0.1703     | -0.1434       | 0.0000        | 0.0000    |
| 3371 | 8126950 | ---      | 0.0000     | 0.0000        | 0.1702        | 0.0000    |
| 3372 | 8143850 | CDK5     | 0.0000     | 0.1701        | 0.0000        | -0.0589   |
| 3373 | 8002969 | MAF      | -0.0917    | 0.0000        | 0.1701        | 0.0180    |
| 3374 | 7992646 | ATP6V0C  | 0.0100     | 0.0000        | 0.0000        | -0.1700   |
| 3375 | 8150197 | DUSP26   | 0.0000     | 0.1700        | -0.0856       | 0.0000    |
| 3376 | 8105111 | FBXO4    | -0.0119    | 0.0000        | 0.1700        | 0.0000    |
| 3377 | 8060963 | SNAP25   | 0.1325     | 0.0000        | -0.1699       | -0.0254   |
| 3378 | 7921088 | NES      | -0.0925    | 0.0000        | 0.1699        | 0.0000    |
| 3379 | 8043283 | KDM3A    | 0.0000     | 0.0000        | -0.1699       | 0.0000    |
| 3380 | 8101212 | CCNI     | 0.0861     | 0.0000        | 0.0000        | -0.1699   |
| 3381 | 7953965 | ---      | 0.0524     | 0.0000        | 0.0000        | -0.1698   |
| 3382 | 8070665 | SIK1     | 0.0000     | 0.0000        | -0.0595       | 0.1697    |
| 3383 | 8099340 | WDR1     | 0.0000     | -0.0161       | 0.1697        | 0.0000    |
| 3384 | 7960143 | ZNF84    | 0.0000     | 0.0000        | -0.1697       | 0.0000    |
| 3385 | 7954645 | TSPAN11  | -0.0093    | 0.0000        | 0.1696        | 0.0000    |
| 3386 | 8146024 | ADAM32   | -0.1405    | 0.0000        | 0.0002        | 0.1696    |
| 3387 | 8014871 | PGAP3    | 0.0000     | 0.0004        | 0.0000        | -0.1696   |
| 3388 | 8157949 | RALGPS1  | 0.0826     | 0.0000        | 0.0000        | -0.1695   |
| 3389 | 7896054 | ---      | 0.0000     | 0.1695        | 0.0000        | -0.1286   |
| 3390 | 7908508 | CRB1     | -0.1694    | 0.0000        | 0.1067        | 0.0913    |
| 3391 | 7940824 | NAT11    | 0.1136     | 0.0000        | -0.1694       | 0.0000    |
| 3392 | 7979811 | ---      | 0.0000     | -0.1693       | 0.0000        | 0.0000    |
| 3393 | 7998449 | C16orf42 | 0.0036     | 0.0000        | 0.0000        | -0.1693   |
| 3394 | 8041995 | SPTBN1   | -0.0308    | -0.0605       | 0.0000        | 0.1692    |
| 3395 | 7899486 | TRNAU1AP | -0.1692    | 0.0000        | 0.0000        | 0.1235    |
| 3396 | 8042925 | SEMA4F   | 0.0426     | 0.0040        | 0.0000        | -0.1691   |
| 3397 | 8122705 | PCMT1    | 0.0000     | 0.0000        | 0.0000        | -0.1691   |
| 3398 | 7950086 | NUMA1    | 0.1690     | 0.0000        | -0.1327       | 0.0000    |
| 3399 | 8010086 | C17orf95 | 0.0000     | 0.0000        | 0.0000        | -0.1689   |
| 3400 | 7901748 | FGGY     | -0.0376    | 0.0000        | 0.0000        | 0.1689    |
| 3401 | 8125048 | DDAH2    | 0.0000     | 0.0000        | 0.1689        | 0.0000    |
| 3402 | 7920984 | CCT3     | 0.0186     | 0.0000        | -0.1688       | 0.0000    |
| 3403 | 8014140 | ---      | 0.0000     | 0.0000        | 0.1688        | 0.0000    |
| 3404 | 7931293 | DOCK1    | -0.0735    | -0.1112       | 0.1686        | 0.0458    |
| 3405 | 7944096 | RNF214   | 0.1685     | 0.0000        | 0.0000        | 0.0000    |
| 3406 | 8066739 | ZNF663   | 0.0000     | 0.0000        | -0.1403       | 0.1684    |
| 3407 | 7914342 | FABP3    | 0.0000     | 0.0000        | 0.0000        | 0.1684    |
| 3408 | 8077663 | JAGN1    | 0.0000     | 0.0000        | 0.0000        | -0.1683   |

| #    | ID      | Name       | SDHB.score | SDHD-AT.score | SDHD-HN.score | VHL.score |
|------|---------|------------|------------|---------------|---------------|-----------|
| 3409 | 8007803 | C17orf69   | 0.1308     | 0.0000        | 0.0000        | -0.1683   |
| 3410 | 7893183 | ---        | 0.0000     | -0.1682       | 0.0000        | 0.0000    |
| 3411 | 8144322 | MYOM2      | 0.0000     | 0.0000        | -0.1682       | 0.0006    |
| 3412 | 7906056 | MSTO2P     | 0.1682     | 0.0000        | -0.1295       | -0.0901   |
| 3413 | 8022145 | L3MBTL4    | 0.1682     | 0.0000        | 0.0000        | 0.0000    |
| 3414 | 8049088 | COPS7B     | 0.0000     | 0.1682        | 0.0000        | 0.0000    |
| 3415 | 7925028 | FAM89A     | 0.0000     | 0.1618        | 0.0000        | -0.1682   |
| 3416 | 7915516 | MED8       | -0.1679    | 0.1310        | 0.0000        | 0.0000    |
| 3417 | 8172022 | TMEM47     | -0.1430    | 0.0000        | 0.0000        | 0.1679    |
| 3418 | 8139203 | C7orf11    | 0.0237     | 0.0737        | 0.0000        | -0.1679   |
| 3419 | 7897044 | PRKCZ      | -0.1527    | 0.0000        | 0.0000        | 0.1678    |
| 3420 | 7899394 | C1orf38    | -0.1141    | 0.0000        | 0.1678        | 0.0000    |
| 3421 | 7892561 | ---        | 0.0000     | 0.1429        | 0.0000        | -0.1677   |
| 3422 | 7892972 | ---        | 0.0000     | 0.0000        | -0.1677       | 0.0000    |
| 3423 | 8097507 | RAB33B     | 0.0000     | 0.0000        | 0.0000        | -0.1675   |
| 3424 | 8107868 | CDC42SE2   | 0.0000     | 0.0000        | 0.1675        | 0.0000    |
| 3425 | 8029321 | ZNF283     | 0.0201     | 0.0000        | -0.1674       | 0.0000    |
| 3426 | 7901601 | MRPL37     | -0.1113    | 0.1673        | 0.0000        | 0.0000    |
| 3427 | 8014794 | CACNB1     | 0.0000     | 0.0000        | 0.0527        | -0.1673   |
| 3428 | 7934334 | TTC18      | -0.0166    | 0.0000        | 0.0000        | 0.1672    |
| 3429 | 8000823 | SMG1       | 0.0000     | -0.1672       | 0.0000        | 0.1198    |
| 3430 | 8013089 | ---        | 0.1670     | 0.0000        | 0.0000        | 0.0000    |
| 3431 | 8171041 | VAMP7      | 0.0000     | 0.0000        | 0.0926        | -0.1669   |
| 3432 | 8133770 | CCDC146    | -0.1669    | 0.0000        | 0.0502        | 0.0590    |
| 3433 | 8131844 | GPNMB      | 0.0000     | 0.0000        | 0.1669        | 0.0000    |
| 3434 | 7907160 | ATP1B1     | 0.1668     | 0.0000        | -0.0679       | -0.1476   |
| 3435 | 8105436 | MAP3K1     | -0.0089    | 0.0000        | 0.0000        | 0.1666    |
| 3436 | 7943749 | LAYN       | 0.0000     | 0.0000        | -0.0623       | 0.1666    |
| 3437 | 7915640 | EIF2B3     | -0.1665    | 0.0000        | 0.0452        | 0.0000    |
| 3438 | 7947332 | IMMP1L     | 0.0607     | 0.0000        | 0.0000        | -0.1665   |
| 3439 | 8026163 | IER2       | -0.1665    | 0.0000        | 0.0000        | 0.1295    |
| 3440 | 8033564 | NDUFA7     | 0.0000     | 0.1664        | 0.0000        | -0.1547   |
| 3441 | 7971373 | ---        | -0.1664    | 0.0000        | 0.0000        | 0.0845    |
| 3442 | 8166184 | CA5B       | 0.0000     | 0.0000        | 0.1662        | 0.0000    |
| 3443 | 8027996 | PSENE1     | 0.0000     | 0.1661        | 0.0000        | 0.0000    |
| 3444 | 8012951 | CDRT1      | 0.0000     | -0.1661       | 0.0000        | 0.0000    |
| 3445 | 8090469 | GATA2      | 0.0000     | 0.0000        | -0.1660       | 0.0000    |
| 3446 | 8087485 | UBA7       | -0.0301    | -0.0259       | 0.1660        | 0.0000    |
| 3447 | 8049075 | B3GNT7     | 0.0656     | 0.0000        | 0.0000        | -0.1659   |
| 3448 | 7894926 | ---        | -0.1659    | 0.0000        | 0.0000        | 0.0000    |
| 3449 | 8163253 | ---        | -0.1020    | 0.0000        | 0.1657        | 0.0000    |
| 3450 | 7997746 | JPH3       | 0.1657     | 0.0000        | 0.0000        | -0.1114   |
| 3451 | 8072582 | ---        | -0.0671    | 0.0000        | 0.0000        | 0.1657    |
| 3452 | 7894661 | ---        | 0.0000     | 0.1657        | 0.0000        | -0.0982   |
| 3453 | 7920687 | GBAP       | 0.1168     | 0.0000        | 0.0000        | -0.1656   |
| 3454 | 7898975 | SRRM1      | -0.1656    | 0.0000        | 0.0000        | 0.0689    |
| 3455 | 7899043 | SEPN1      | -0.1654    | 0.0000        | 0.1082        | 0.0403    |
| 3456 | 8149315 | C8orf15    | 0.1654     | 0.0000        | -0.0033       | -0.0134   |
| 3457 | 8137008 | C7orf11    | 0.0000     | 0.0000        | 0.0000        | 0.1652    |
| 3458 | 8041900 | ---        | 0.0000     | 0.1652        | 0.0000        | -0.1279   |
| 3459 | 7894451 | ---        | -0.1651    | 0.0000        | 0.0000        | 0.1163    |
| 3460 | 8121729 | PLN        | -0.1159    | 0.0000        | 0.0000        | 0.1650    |
| 3461 | 7944554 | TMEM136    | 0.1649     | 0.0000        | 0.0000        | 0.0000    |
| 3462 | 7945283 | ACAD8      | 0.0710     | -0.1649       | 0.0000        | 0.0000    |
| 3463 | 8083569 | TIPARP     | -0.1383    | 0.0000        | 0.0000        | 0.1648    |
| 3464 | 8090866 | ANAPC13    | 0.0000     | 0.0000        | 0.0000        | -0.1648   |
| 3465 | 8032418 | AP3D1      | 0.0295     | 0.0000        | -0.1648       | 0.0000    |
| 3466 | 8039593 | ZNF667     | 0.0000     | 0.0000        | -0.1647       | 0.0000    |
| 3467 | 7934842 | MMRN2      | -0.0646    | 0.0000        | 0.1645        | 0.0000    |
| 3468 | 7961798 | SOX5       | -0.0055    | 0.0000        | 0.0000        | 0.1643    |
| 3469 | 8041168 | SNORD53    | 0.0000     | -0.1643       | 0.0000        | 0.0784    |
| 3470 | 8005191 | NCRNA00188 | 0.0892     | 0.0000        | 0.0000        | -0.1643   |



| #    | ID      | Name      | SDHB.score | SDHD-AT.score | SDHD-HN.score | VHL.score |
|------|---------|-----------|------------|---------------|---------------|-----------|
| 3471 | 8127646 | FILIP1    | -0.1642    | -0.0652       | 0.1500        | 0.1616    |
| 3472 | 7893385 | ---       | 0.0000     | 0.0517        | 0.0000        | -0.1640   |
| 3473 | 8043446 | ---       | 0.0000     | 0.0000        | 0.1640        | 0.0000    |
| 3474 | 8117372 | HIST1H2AC | -0.1190    | 0.0000        | 0.0000        | 0.1640    |
| 3475 | 7892728 | ---       | 0.0000     | 0.1639        | 0.0000        | 0.0000    |
| 3476 | 7915333 | RIMS3     | 0.0000     | 0.1638        | 0.0000        | 0.0000    |
| 3477 | 8094789 | LIMCH1    | 0.0000     | 0.0000        | 0.0000        | 0.1637    |
| 3478 | 8138912 | LSM5      | 0.0000     | 0.0852        | 0.0000        | -0.1634   |
| 3479 | 8180395 | ---       | 0.0000     | 0.1634        | 0.0000        | -0.0326   |
| 3480 | 7897370 | VAMP3     | -0.1634    | 0.0000        | 0.0000        | 0.0000    |
| 3481 | 7968650 | C13orf36  | 0.0000     | 0.0000        | 0.1016        | -0.1634   |
| 3482 | 8090256 | SNX4      | 0.0000     | 0.0000        | 0.0000        | -0.1633   |
| 3483 | 8168500 | PGK1      | 0.0000     | 0.0000        | -0.0347       | 0.1632    |
| 3484 | 8013305 | ZNF286A   | 0.0000     | 0.0000        | 0.0000        | 0.1632    |
| 3485 | 8072413 | SMTN      | 0.0000     | -0.1191       | 0.0000        | 0.1631    |
| 3486 | 8049512 | LRRFIP1   | -0.0435    | -0.1631       | 0.1241        | 0.0556    |
| 3487 | 8095826 | STBD1     | 0.0000     | 0.0000        | -0.1630       | 0.0000    |
| 3488 | 8070182 | RCAN1     | -0.0918    | 0.0000        | 0.1629        | 0.0000    |
| 3489 | 7987225 | NOP10     | 0.0000     | 0.1019        | 0.0000        | -0.1628   |
| 3490 | 8097773 | MAB21L2   | 0.0000     | 0.0000        | 0.0712        | -0.1628   |
| 3491 | 7895602 | ---       | -0.1628    | 0.1346        | 0.0000        | 0.0000    |
| 3492 | 8059301 | PAX3      | 0.1627     | 0.0000        | 0.0000        | -0.0198   |
| 3493 | 8100994 | CXCL2     | -0.1626    | 0.0000        | 0.0000        | 0.0855    |
| 3494 | 7892921 | ---       | 0.0000     | 0.0000        | 0.1625        | -0.0859   |
| 3495 | 7968370 | B3GALTL   | 0.0000     | 0.0000        | 0.0960        | -0.1624   |
| 3496 | 7954419 | ETNK1     | -0.0739    | 0.0000        | 0.0000        | 0.1623    |
| 3497 | 7988414 | GATM      | -0.1623    | 0.0000        | 0.0000        | 0.0000    |
| 3498 | 7892598 | ---       | 0.0050     | 0.0000        | 0.0000        | -0.1622   |
| 3499 | 7940914 | FKBP2     | 0.0712     | 0.0000        | -0.1622       | 0.0000    |
| 3500 | 7973002 | FLJ39632  | 0.0000     | 0.0000        | 0.1621        | 0.0000    |
| 3501 | 7895180 | ---       | -0.1579    | 0.1621        | 0.0000        | 0.0000    |
| 3502 | 7894494 | ---       | 0.0000     | -0.1621       | 0.0000        | 0.0000    |
| 3503 | 7981068 | SERPINA1  | -0.0673    | 0.0000        | 0.1619        | 0.0000    |
| 3504 | 8119153 | COX6A1    | 0.0000     | 0.1177        | 0.0000        | -0.1619   |
| 3505 | 8011027 | MYO1C     | 0.0000     | -0.1619       | 0.0000        | 0.0000    |
| 3506 | 8050213 | ---       | 0.0000     | 0.0000        | 0.1618        | 0.0000    |
| 3507 | 8016508 | SNF8      | 0.0000     | 0.1617        | 0.0000        | 0.0000    |
| 3508 | 8102321 | PLA2G12A  | 0.0000     | 0.0000        | 0.0000        | -0.1616   |
| 3509 | 7900546 | PPCS      | -0.1615    | 0.0000        | 0.0000        | 0.0000    |
| 3510 | 8078252 | UBE2E2    | 0.0000     | 0.0000        | 0.1614        | -0.1002   |
| 3511 | 7893363 | ---       | 0.0000     | -0.1614       | 0.0000        | 0.0000    |
| 3512 | 7893398 | ---       | -0.0434    | 0.0000        | 0.0000        | 0.1613    |
| 3513 | 7914550 | ZBTB80S   | -0.1612    | 0.0624        | 0.0826        | 0.0000    |
| 3514 | 7894908 | ---       | 0.0264     | 0.0000        | 0.0000        | -0.1610   |
| 3515 | 7975889 | VASH1     | -0.0736    | 0.0000        | 0.1609        | 0.0000    |
| 3516 | 8122013 | L3MBTL3   | -0.0864    | 0.0000        | 0.1608        | 0.0000    |
| 3517 | 7922095 | BRP44     | 0.0328     | 0.0979        | 0.0000        | -0.1608   |
| 3518 | 7893110 | ---       | 0.0000     | 0.1608        | 0.0000        | 0.0000    |
| 3519 | 7895525 | ---       | 0.0984     | -0.1607       | 0.0000        | 0.0000    |
| 3520 | 8114572 | HBEGF     | -0.1515    | 0.0000        | 0.0000        | 0.1606    |
| 3521 | 7988763 | TNFAIP8L3 | 0.0000     | 0.0000        | 0.1605        | 0.0000    |
| 3522 | 7987310 | GJD2      | 0.0000     | 0.0000        | 0.0000        | 0.1605    |
| 3523 | 7931081 | PLEKHA1   | 0.1605     | 0.0000        | 0.0000        | -0.1541   |
| 3524 | 7892901 | ---       | -0.1602    | 0.0000        | 0.0000        | 0.0410    |
| 3525 | 7898739 | CDC42     | -0.1600    | 0.0000        | 0.0000        | 0.0567    |
| 3526 | 8161169 | ---       | -0.1599    | 0.0000        | 0.0000        | 0.0000    |
| 3527 | 8115327 | SPARC     | -0.1475    | -0.0304       | 0.1598        | 0.1163    |
| 3528 | 7892592 | ---       | -0.1523    | 0.0000        | 0.0000        | 0.1598    |
| 3529 | 7918284 | TAF13     | -0.1597    | 0.0000        | 0.0427        | 0.0000    |
| 3530 | 8060484 | NOP56     | 0.0000     | 0.0000        | -0.1596       | 0.0515    |
| 3531 | 7941639 | BBS1      | 0.1596     | 0.0000        | 0.0000        | -0.1201   |
| 3532 | 8038202 | BCAT2     | 0.0000     | 0.0636        | 0.0000        | -0.1594   |

| #    | ID      | Name      | SDHB.score | SDHD-AT.score | SDHD-HN.score | VHL.score |
|------|---------|-----------|------------|---------------|---------------|-----------|
| 3533 | 7978093 | JPH4      | 0.0295     | 0.0000        | -0.1594       | 0.0000    |
| 3534 | 8057677 | SLC40A1   | -0.1592    | 0.0000        | 0.0102        | 0.0472    |
| 3535 | 7903694 | GPR61     | 0.0000     | 0.1592        | 0.0000        | -0.0339   |
| 3536 | 7900030 | EIF2C1    | -0.0298    | 0.1591        | 0.0000        | 0.0000    |
| 3537 | 7895276 | ---       | 0.0391     | 0.0000        | -0.1591       | 0.0000    |
| 3538 | 7908940 | ATP2B4    | -0.0038    | 0.0000        | 0.1591        | 0.0000    |
| 3539 | 8167790 | TSR2      | 0.0000     | 0.1590        | 0.0000        | -0.0153   |
| 3540 | 8022927 | SLC39A6   | 0.1590     | 0.0000        | 0.0000        | -0.1329   |
| 3541 | 7974587 | ACTR10    | 0.0000     | 0.0553        | 0.0000        | -0.1589   |
| 3542 | 8110990 | CTNND2    | 0.0000     | 0.0000        | -0.1587       | 0.0000    |
| 3543 | 7935746 | BLOC1S2   | 0.0592     | 0.0000        | 0.0000        | -0.1587   |
| 3544 | 8151559 | SLC10A5   | 0.0000     | 0.1587        | 0.0000        | -0.0537   |
| 3545 | 7935707 | CHUK      | 0.0000     | 0.0000        | 0.0000        | -0.1586   |
| 3546 | 8133549 | GTF2IRD2B | -0.0001    | 0.0000        | 0.0000        | 0.1585    |
| 3547 | 7930454 | PDCD4     | 0.0623     | 0.0000        | -0.1585       | 0.0000    |
| 3548 | 8070603 | RSPH1     | 0.0000     | 0.0000        | -0.0378       | 0.1585    |
| 3549 | 7986675 | NIPA1     | 0.1585     | 0.0000        | 0.0000        | -0.1287   |
| 3550 | 8110147 | C5orf25   | 0.1454     | 0.0977        | -0.1584       | -0.1453   |
| 3551 | 8146618 | RLBP1L1   | 0.1583     | 0.0000        | -0.0108       | -0.0545   |
| 3552 | 8165508 | NRARP     | 0.0000     | 0.0000        | 0.1583        | 0.0000    |
| 3553 | 8180295 | ---       | -0.1582    | 0.0000        | 0.0000        | 0.1238    |
| 3554 | 7959023 | MAP1LC3B2 | 0.0000     | 0.0000        | 0.0000        | -0.1582   |
| 3555 | 7943376 | KIAA1377  | 0.1139     | 0.0000        | -0.1582       | 0.0000    |
| 3556 | 7985786 | ACAN      | 0.0000     | 0.0000        | 0.0000        | 0.1581    |
| 3557 | 7895976 | ---       | 0.0000     | -0.1581       | 0.0000        | 0.0000    |
| 3558 | 8163147 | ---       | 0.0000     | 0.0000        | 0.0000        | 0.1581    |
| 3559 | 8143788 | ---       | -0.0430    | 0.0000        | 0.1580        | 0.0000    |
| 3560 | 7946815 | PIK3C2A   | -0.0184    | 0.0000        | 0.1580        | 0.0000    |
| 3561 | 7901804 | INADL     | 0.0000     | 0.1579        | -0.1296       | 0.0000    |
| 3562 | 7994826 | ITGAL     | 0.0000     | 0.0000        | 0.1578        | 0.0000    |
| 3563 | 8046461 | ZAK       | 0.0000     | -0.0144       | 0.1578        | 0.0000    |
| 3564 | 7932243 | FAM171A1  | 0.0000     | 0.0000        | 0.1577        | -0.0116   |
| 3565 | 8129666 | SLC2A12   | 0.1577     | 0.0000        | -0.0764       | -0.1543   |
| 3566 | 8139250 | MRPS24    | 0.0000     | 0.1576        | 0.0000        | -0.1459   |
| 3567 | 8072876 | LGALS1    | -0.1293    | 0.0000        | 0.0220        | 0.1576    |
| 3568 | 8079224 | ZNF502    | 0.1154     | 0.0000        | 0.0000        | -0.1576   |
| 3569 | 8108724 | PCDHB10   | 0.1069     | 0.0000        | 0.0000        | -0.1575   |
| 3570 | 8038874 | FLJ30403  | 0.1574     | 0.0000        | 0.0000        | -0.1336   |
| 3571 | 8013222 | TOP3A     | 0.0000     | -0.1574       | 0.0000        | 0.0000    |
| 3572 | 7954969 | IRAK4     | -0.1290    | 0.0000        | 0.1574        | 0.0000    |
| 3573 | 7892918 | ---       | 0.0000     | -0.1574       | 0.0000        | 0.0000    |
| 3574 | 7995292 | SLC6A8    | 0.0000     | 0.0000        | 0.0000        | 0.1574    |
| 3575 | 7997396 | ATMIN     | 0.0000     | 0.0491        | 0.0000        | -0.1574   |
| 3576 | 8003627 | TIMM22    | 0.0811     | 0.0000        | 0.0000        | -0.1574   |
| 3577 | 8008087 | NFE2L1    | 0.0290     | 0.0000        | 0.0000        | -0.1574   |
| 3578 | 7934906 | ACTA2     | -0.0408    | 0.0000        | 0.1573        | 0.0000    |
| 3579 | 8080013 | MAPKAPK3  | 0.0000     | 0.0000        | 0.0000        | -0.1573   |
| 3580 | 7894465 | ---       | 0.0518     | 0.0000        | 0.0000        | -0.1572   |
| 3581 | 7910503 | TRIM67    | 0.0000     | 0.1572        | 0.0000        | 0.0000    |
| 3582 | 7898875 | RPL11     | -0.0853    | 0.1572        | 0.0000        | 0.0000    |
| 3583 | 8088560 | ADAMTS9   | -0.0857    | 0.0000        | 0.0000        | 0.1571    |
| 3584 | 7979982 | ---       | 0.0000     | 0.1571        | 0.0000        | 0.0000    |
| 3585 | 8154305 | SELT      | 0.0000     | 0.0265        | 0.0000        | -0.1571   |
| 3586 | 7954985 | TMEM117   | 0.1570     | 0.0000        | 0.0000        | -0.1376   |
| 3587 | 8025601 | ICAM1     | -0.0963    | 0.0000        | 0.1570        | 0.0000    |
| 3588 | 8145865 | GPR124    | 0.0000     | 0.0000        | 0.1568        | 0.0000    |
| 3589 | 7895832 | ---       | 0.0000     | 0.0797        | 0.0000        | -0.1567   |
| 3590 | 7935011 | CPEB3     | 0.1098     | 0.0000        | 0.0000        | -0.1567   |
| 3591 | 8027024 | UBA52     | 0.0000     | 0.1567        | 0.0000        | -0.0221   |
| 3592 | 8131303 | WIPI2     | 0.0000     | 0.1567        | 0.0000        | 0.0000    |
| 3593 | 8102848 | SETD7     | 0.0000     | -0.0025       | 0.1567        | 0.0000    |
| 3594 | 7938544 | TEAD1     | 0.0804     | 0.0000        | 0.0000        | -0.1567   |

| #    | ID      | Name        | SDHB.score | SDHD-AT.score | SDHD-HN.score | VHL.score |
|------|---------|-------------|------------|---------------|---------------|-----------|
| 3595 | 7982074 | SNORD115-34 | -0.0204    | 0.1567        | 0.0000        | 0.0000    |
| 3596 | 7929689 | MARVELD1    | -0.1566    | 0.0000        | 0.0192        | 0.0000    |
| 3597 | 7940717 | SLC3A2      | 0.1275     | 0.0000        | 0.0000        | -0.1566   |
| 3598 | 7895840 | ---         | 0.1565     | -0.0509       | 0.0000        | -0.0347   |
| 3599 | 7895162 | ---         | 0.1565     | 0.0000        | 0.0000        | 0.0000    |
| 3600 | 7945321 | GLB1L2      | 0.0550     | 0.0000        | -0.1564       | 0.0000    |
| 3601 | 8104693 | PDZD2       | -0.0766    | 0.0000        | 0.1563        | 0.0000    |
| 3602 | 7983928 | LIPC        | 0.0000     | 0.0000        | 0.1563        | 0.0000    |
| 3603 | 8091941 | PDCD10      | 0.0000     | 0.0000        | 0.1563        | 0.0000    |
| 3604 | 7894322 | ---         | 0.0000     | 0.0000        | -0.1563       | 0.0137    |
| 3605 | 7919637 | HIST2H2BE   | -0.0209    | 0.0000        | 0.0000        | 0.1563    |
| 3606 | 7962203 | YARS2       | 0.0000     | 0.0402        | 0.0000        | -0.1562   |
| 3607 | 7900888 | IPO13       | -0.0019    | 0.1562        | 0.0000        | 0.0000    |
| 3608 | 8099259 | AFAP1       | 0.0000     | -0.0025       | 0.1561        | 0.0000    |
| 3609 | 8140170 | GTF2IRD2    | 0.0000     | 0.0000        | 0.0000        | 0.1561    |
| 3610 | 7896553 | ---         | 0.0000     | 0.0475        | 0.0000        | -0.1561   |
| 3611 | 7919940 | VPS72       | 0.0768     | 0.0000        | 0.0000        | -0.1561   |
| 3612 | 8124524 | HIST1H2AK   | 0.0000     | 0.0000        | 0.0000        | 0.1560    |
| 3613 | 8126474 | MEA1        | 0.0000     | 0.0000        | 0.0000        | -0.1559   |
| 3614 | 8115997 | RAB24       | 0.0204     | 0.1558        | 0.0000        | -0.1332   |
| 3615 | 7976128 | TTC8        | 0.0000     | 0.1257        | -0.1558       | 0.0000    |
| 3616 | 8058350 | ICA1L       | 0.1557     | 0.0000        | -0.0698       | -0.1531   |
| 3617 | 8016366 | MRPL10      | 0.0000     | 0.0000        | 0.0000        | -0.1557   |
| 3618 | 7894338 | ---         | 0.0000     | 0.1557        | 0.0000        | 0.0000    |
| 3619 | 8089606 | WDR52       | -0.1557    | 0.0000        | 0.0000        | 0.0000    |
| 3620 | 8180199 | ---         | -0.1417    | 0.0000        | 0.0000        | 0.1557    |
| 3621 | 7896035 | ---         | 0.0000     | 0.0000        | 0.0000        | -0.1555   |
| 3622 | 8033899 | EIF3G       | 0.0000     | 0.1555        | 0.0000        | -0.1382   |
| 3623 | 7893215 | ---         | 0.0285     | -0.1554       | 0.0000        | 0.0000    |
| 3624 | 8078442 | CCR4        | 0.0000     | 0.0000        | 0.1554        | 0.0000    |
| 3625 | 8105104 | C5orf51     | 0.0000     | 0.0000        | 0.0000        | -0.1553   |
| 3626 | 7954006 | ---         | 0.0000     | 0.0000        | 0.1552        | 0.0000    |
| 3627 | 7892836 | ---         | 0.0000     | 0.0732        | 0.0000        | -0.1552   |
| 3628 | 7960716 | PHB2        | 0.0000     | 0.0717        | 0.0000        | -0.1552   |
| 3629 | 7903119 | ABCD3       | -0.1551    | 0.0000        | 0.0000        | 0.0803    |
| 3630 | 7952056 | CD3D        | 0.0000     | 0.0000        | 0.1551        | 0.0000    |
| 3631 | 8017133 | SKA2        | 0.1172     | 0.0000        | 0.0000        | -0.1551   |
| 3632 | 8180290 | ---         | -0.1487    | 0.0000        | 0.0000        | 0.1550    |
| 3633 | 7896075 | ---         | 0.0000     | 0.0000        | 0.0000        | 0.1550    |
| 3634 | 8102311 | CASP6       | 0.0000     | 0.0000        | 0.1550        | 0.0000    |
| 3635 | 7905067 | HIST2H4A    | -0.0056    | 0.1549        | 0.0000        | 0.0000    |
| 3636 | 7973110 | RNASE2      | -0.0454    | 0.0000        | 0.1549        | 0.0000    |
| 3637 | 7960117 | PXMP2       | 0.0000     | 0.0000        | 0.0000        | -0.1549   |
| 3638 | 7968976 | LRCH1       | -0.0799    | 0.0000        | 0.0000        | 0.1549    |
| 3639 | 8006655 | DHRS11      | 0.0571     | 0.0000        | 0.0000        | -0.1549   |
| 3640 | 8151993 | COX6C       | 0.0000     | 0.1548        | 0.0000        | -0.0579   |
| 3641 | 8012953 | TRIM16      | 0.0000     | -0.1547       | 0.0000        | 0.0000    |
| 3642 | 8162936 | OR13C2      | 0.0000     | 0.1547        | 0.0000        | 0.0000    |
| 3643 | 8139083 | ---         | -0.0060    | -0.0544       | 0.0000        | 0.1546    |
| 3644 | 7894804 | ---         | 0.0000     | 0.0000        | 0.1546        | -0.0432   |
| 3645 | 8099922 | ---         | 0.0000     | -0.1546       | 0.0000        | 0.0000    |
| 3646 | 8079426 | TMIE        | 0.0000     | 0.0000        | -0.1546       | 0.0000    |
| 3647 | 7893614 | ---         | 0.0000     | 0.1546        | 0.0000        | -0.0753   |
| 3648 | 7921652 | SLAMF1      | 0.0000     | 0.0000        | 0.1545        | 0.0000    |
| 3649 | 8003953 | PSMB6       | 0.0015     | 0.0000        | 0.0000        | -0.1545   |
| 3650 | 8157804 | OLFML2A     | 0.0000     | 0.0000        | 0.1545        | 0.0000    |
| 3651 | 7896108 | ---         | -0.1544    | 0.0310        | 0.0000        | 0.0000    |
| 3652 | 8153937 | SCRT1       | 0.1128     | 0.0000        | 0.0000        | -0.1544   |
| 3653 | 8155540 | CNTNAP3     | 0.0000     | -0.1543       | 0.0000        | 0.1105    |
| 3654 | 7943240 | PIWIL4      | -0.1446    | 0.0000        | 0.0000        | 0.1542    |
| 3655 | 7941136 | C11orf2     | 0.1542     | 0.0000        | 0.0000        | -0.0242   |
| 3656 | 8087685 | TMEM115     | 0.0000     | 0.0000        | 0.0000        | -0.1540   |

| #    | ID      | Name      | SDHB.score | SDHD-AT.score | SDHD-HN.score | VHL.score |
|------|---------|-----------|------------|---------------|---------------|-----------|
| 3657 | 7895222 | ---       | 0.1540     | 0.0000        | 0.0000        | 0.0000    |
| 3658 | 8129880 | PERP      | 0.0859     | 0.0000        | 0.0000        | -0.1540   |
| 3659 | 7965964 | SLC41A2   | 0.0965     | 0.0000        | 0.0000        | -0.1540   |
| 3660 | 7893079 | ---       | 0.0000     | 0.0000        | 0.0000        | -0.1540   |
| 3661 | 8024572 | GNA15     | -0.0972    | 0.0000        | 0.1539        | 0.0000    |
| 3662 | 8096361 | HERC5     | 0.1539     | 0.0000        | 0.0000        | -0.0743   |
| 3663 | 8155883 | OSTF1     | -0.1539    | 0.0000        | 0.0000        | 0.0737    |
| 3664 | 8178590 | DDAH2     | 0.0000     | 0.0000        | 0.1539        | 0.0000    |
| 3665 | 8170775 | SSR4      | 0.0000     | 0.1539        | -0.1291       | 0.0000    |
| 3666 | 7918681 | RSBN1     | -0.1539    | 0.0000        | 0.0000        | 0.0000    |
| 3667 | 7926896 | CKS1B     | 0.0000     | 0.0000        | -0.1539       | 0.0000    |
| 3668 | 8171725 | MAP7D2    | 0.0424     | 0.0000        | 0.0000        | -0.1538   |
| 3669 | 8069178 | ADARB1    | 0.0000     | -0.0702       | 0.1538        | 0.0000    |
| 3670 | 8119661 | C6orf153  | 0.0000     | 0.0000        | 0.0000        | -0.1537   |
| 3671 | 8168458 | MAGEE1    | 0.0783     | 0.0000        | 0.0000        | -0.1537   |
| 3672 | 7944365 | CCDC84    | 0.0000     | -0.1535       | 0.0000        | 0.0000    |
| 3673 | 8104298 | NDUFS6    | 0.0000     | 0.0000        | 0.0000        | -0.1535   |
| 3674 | 8072626 | TIMP3     | -0.1534    | 0.0000        | 0.0000        | 0.1155    |
| 3675 | 7892683 | ---       | 0.1534     | 0.0000        | 0.0000        | 0.0000    |
| 3676 | 7964076 | CNPY2     | 0.0000     | 0.1534        | 0.0000        | 0.0000    |
| 3677 | 8130539 | TAGAP     | -0.0273    | 0.0000        | 0.1534        | 0.0000    |
| 3678 | 8167957 | ZC3H12B   | 0.0000     | 0.1534        | 0.0000        | -0.0493   |
| 3679 | 8106479 | SCAMP1    | 0.0564     | 0.0000        | -0.1533       | 0.0000    |
| 3680 | 7986214 | SLCO3A1   | 0.0000     | -0.1532       | 0.0028        | 0.0026    |
| 3681 | 8004043 | ENO3      | 0.1531     | 0.0000        | 0.0000        | 0.0000    |
| 3682 | 7969736 | FARP1     | -0.0889    | 0.0000        | 0.0000        | 0.1531    |
| 3683 | 8092000 | TERC      | 0.0863     | 0.0000        | -0.1531       | 0.0000    |
| 3684 | 8064007 | C20orf11  | 0.1531     | 0.0000        | 0.0000        | -0.0543   |
| 3685 | 7970954 | DCLK1     | 0.0000     | 0.0000        | 0.0803        | -0.1530   |
| 3686 | 8175815 | PNCK      | 0.0000     | 0.0000        | 0.0000        | 0.1530    |
| 3687 | 7980296 | TMED10    | 0.0188     | 0.0000        | -0.1530       | 0.0000    |
| 3688 | 7917199 | TTLL7     | -0.0249    | 0.0000        | 0.0000        | 0.1529    |
| 3689 | 8083779 | SERPINI1  | 0.0000     | 0.0200        | 0.0000        | -0.1529   |
| 3690 | 8155554 | AQP7P1    | -0.0740    | 0.0000        | 0.0000        | 0.1529    |
| 3691 | 7916356 | HSPB11    | -0.1529    | 0.0000        | 0.0000        | 0.0191    |
| 3692 | 7985767 | AEN       | 0.1529     | 0.0000        | 0.0000        | -0.0781   |
| 3693 | 7895453 | ---       | 0.0000     | 0.0000        | 0.1529        | 0.0000    |
| 3694 | 8117955 | MRPS18B   | 0.0000     | 0.0000        | 0.0000        | -0.1528   |
| 3695 | 7940679 | TTC9C     | 0.1527     | 0.0000        | 0.0000        | 0.0000    |
| 3696 | 7895885 | ---       | 0.0000     | 0.0000        | 0.0000        | -0.1527   |
| 3697 | 8129418 | PTPRK     | -0.1527    | 0.0000        | 0.0744        | 0.0842    |
| 3698 | 8014142 | ---       | 0.0000     | -0.1071       | 0.1527        | 0.0000    |
| 3699 | 7944632 | TECTA     | 0.0580     | 0.0000        | -0.1527       | 0.0000    |
| 3700 | 8069668 | CYYR1     | -0.1323    | 0.0000        | 0.1526        | 0.0000    |
| 3701 | 7895293 | ---       | 0.0000     | 0.0000        | 0.0000        | 0.1525    |
| 3702 | 8180194 | ---       | -0.1439    | 0.0000        | 0.0000        | 0.1525    |
| 3703 | 8165648 | C7orf11   | 0.0000     | 0.0000        | 0.0000        | 0.1524    |
| 3704 | 8136095 | AHCYL2    | 0.1336     | 0.0000        | 0.0000        | -0.1524   |
| 3705 | 8105989 | POM121L8P | -0.1523    | 0.0000        | 0.1321        | 0.0000    |
| 3706 | 7895845 | ---       | 0.0000     | -0.1523       | 0.0000        | 0.0000    |
| 3707 | 8098611 | TLR3      | -0.1157    | 0.0000        | 0.1523        | 0.0219    |
| 3708 | 7905365 | PIP5K1A   | 0.1523     | 0.0000        | 0.0000        | -0.0462   |
| 3709 | 8137215 | LRRRC61   | 0.0000     | 0.0000        | -0.1145       | 0.1523    |
| 3710 | 8152988 | SLA       | -0.1522    | 0.0000        | 0.0715        | 0.1364    |
| 3711 | 7917120 | USP33     | -0.1522    | 0.0412        | 0.0000        | 0.0000    |
| 3712 | 8128553 | BVES      | 0.1249     | 0.0000        | 0.0000        | -0.1521   |
| 3713 | 7906904 | HSD17B7   | 0.0000     | 0.0000        | -0.1521       | 0.0000    |
| 3714 | 8023968 | CDC34     | 0.0000     | 0.1520        | 0.0000        | -0.1351   |
| 3715 | 7942476 | PAAF1     | 0.1519     | -0.1320       | 0.0000        | 0.0000    |
| 3716 | 8039771 | ZNF132    | 0.1194     | 0.0000        | -0.1519       | 0.0000    |
| 3717 | 7926189 | SEC61A2   | 0.1519     | 0.0000        | 0.0000        | -0.1498   |
| 3718 | 8113873 | HINT1     | 0.0000     | 0.1517        | 0.0000        | -0.0705   |

| #    | ID      | Name          | SDHB.score | SDHD-AT.score | SDHD-HN.score | VHL.score |
|------|---------|---------------|------------|---------------|---------------|-----------|
| 3719 | 7892633 | ---           | 0.0000     | 0.0000        | 0.0000        | 0.1516    |
| 3720 | 7990309 | STRA6         | 0.1516     | -0.0911       | 0.0000        | 0.0000    |
| 3721 | 8069880 | TIAM1         | 0.0051     | 0.0000        | -0.1515       | 0.0000    |
| 3722 | 7941478 | SART1         | 0.1515     | -0.0385       | 0.0000        | 0.0000    |
| 3723 | 8000687 | SMG1          | 0.0000     | -0.1514       | 0.0000        | 0.1342    |
| 3724 | 8006736 | DUSP14        | 0.0000     | 0.0000        | 0.0000        | -0.1514   |
| 3725 | 8041638 | ---           | 0.1514     | 0.0000        | 0.0000        | -0.1501   |
| 3726 | 7899870 | ZNF362        | -0.1513    | 0.0000        | 0.0000        | 0.0000    |
| 3727 | 7894582 | ---           | 0.0000     | -0.1510       | 0.0000        | 0.0000    |
| 3728 | 8014037 | CRLF3         | 0.0000     | 0.0000        | 0.1510        | 0.0000    |
| 3729 | 7897404 | PARK7         | -0.1509    | 0.0000        | 0.0000        | 0.0000    |
| 3730 | 8043038 | ---           | 0.0000     | 0.1509        | 0.0000        | 0.0000    |
| 3731 | 7981427 | CKB           | 0.0000     | 0.0000        | -0.1508       | 0.1283    |
| 3732 | 8095148 | TMEM165       | -0.0984    | 0.0000        | 0.1506        | 0.0000    |
| 3733 | 7922656 | ACBD6         | 0.0379     | 0.0000        | 0.0000        | -0.1506   |
| 3734 | 7996318 | CMTM3         | 0.0000     | 0.0000        | 0.1506        | 0.0000    |
| 3735 | 7893709 | ---           | -0.1505    | 0.0000        | 0.0000        | 0.0000    |
| 3736 | 8020220 | TUBB6         | 0.0000     | 0.0000        | 0.1504        | 0.0000    |
| 3737 | 7944195 | UBE4A         | 0.1012     | -0.1504       | 0.0000        | 0.0000    |
| 3738 | 7898881 | TCEB3         | -0.1504    | 0.0000        | 0.0000        | 0.0683    |
| 3739 | 7958913 | OAS2          | -0.0613    | -0.0059       | 0.1503        | 0.0000    |
| 3740 | 8144184 | ESYT2         | 0.0000     | -0.1012       | 0.0000        | 0.1503    |
| 3741 | 7960052 | SNORA49       | 0.0000     | 0.0000        | -0.1503       | 0.0000    |
| 3742 | 8176076 | DNASE1L1      | 0.0000     | 0.0000        | 0.0000        | -0.1502   |
| 3743 | 7973679 | C14orf21      | 0.1502     | 0.0000        | 0.0000        | 0.0000    |
| 3744 | 8133167 | KCTD7         | 0.0921     | 0.0000        | 0.0000        | -0.1501   |
| 3745 | 7955110 | DKFZP779L1853 | 0.1500     | 0.0000        | 0.0000        | -0.0469   |
| 3746 | 8103494 | NPY1R         | -0.1096    | 0.0000        | 0.0000        | 0.1500    |
| 3747 | 8079966 | SEMA3B        | -0.0268    | 0.0000        | 0.0000        | 0.1499    |
| 3748 | 8156905 | TMEFF1        | 0.0170     | 0.0000        | 0.0000        | -0.1498   |
| 3749 | 7975238 | PLEKHH1       | 0.0000     | 0.0000        | -0.1498       | 0.0059    |
| 3750 | 8086218 | ---           | 0.0000     | 0.1498        | 0.0000        | 0.0000    |
| 3751 | 8147221 | OSGIN2        | 0.0000     | 0.0000        | 0.0000        | -0.1497   |
| 3752 | 7988093 | TP53BP1       | 0.0000     | 0.0000        | -0.1497       | 0.0000    |
| 3753 | 7918487 | DENND2D       | -0.0536    | -0.0181       | 0.1497        | 0.0000    |
| 3754 | 7935510 | MORN4         | 0.0153     | 0.0640        | 0.0000        | -0.1497   |
| 3755 | 8137826 | FTSJ2         | 0.0000     | 0.0073        | 0.0000        | -0.1496   |
| 3756 | 7895952 | ---           | 0.0000     | -0.1496       | 0.0000        | 0.0040    |
| 3757 | 8140709 | KIAA1324L     | 0.0255     | 0.0000        | 0.0000        | -0.1494   |
| 3758 | 8176558 | TTY2          | 0.0000     | 0.0000        | 0.0000        | 0.1494    |
| 3759 | 7901219 | NSUN4         | -0.1494    | 0.0000        | 0.0000        | 0.0000    |
| 3760 | 7919971 | RFX5          | 0.1348     | 0.0000        | 0.0000        | -0.1493   |
| 3761 | 7895753 | ---           | -0.0197    | 0.0000        | 0.0000        | 0.1493    |
| 3762 | 7894884 | ---           | 0.1491     | 0.0000        | 0.0000        | 0.0000    |
| 3763 | 7942279 | FAM86C        | 0.0864     | 0.0000        | 0.0000        | -0.1491   |
| 3764 | 7911568 | SSU72         | -0.1491    | 0.0000        | 0.0000        | 0.0000    |
| 3765 | 7895277 | ---           | 0.0201     | 0.0000        | 0.0000        | -0.1491   |
| 3766 | 7902541 | IFI44L        | -0.0684    | -0.0144       | 0.1489        | 0.0062    |
| 3767 | 7894518 | ---           | -0.1487    | 0.0000        | 0.0347        | 0.0000    |
| 3768 | 8093191 | DLG1          | 0.0000     | 0.0000        | -0.1487       | 0.0000    |
| 3769 | 8072744 | NCF4          | -0.0973    | 0.0000        | 0.1487        | 0.0000    |
| 3770 | 7964246 | SNORD59B      | 0.1487     | 0.0000        | 0.0000        | -0.1124   |
| 3771 | 8120613 | RIMS1         | -0.1485    | 0.0000        | 0.0000        | 0.1240    |
| 3772 | 7918847 | SIKE1         | -0.0964    | 0.1485        | 0.0000        | 0.0000    |
| 3773 | 7942647 | LOC387790     | 0.0000     | 0.0000        | -0.1485       | 0.0000    |
| 3774 | 7907830 | QSOX1         | 0.1485     | 0.0000        | 0.0000        | -0.1222   |
| 3775 | 7957549 | ---           | 0.0000     | 0.1485        | 0.0000        | 0.0000    |
| 3776 | 7902553 | IFI44         | -0.0195    | -0.1484       | 0.0349        | 0.0705    |
| 3777 | 8080100 | RAD54L2       | 0.0000     | 0.0000        | 0.0180        | -0.1484   |
| 3778 | 7940051 | ZDHHC5        | 0.0573     | -0.1483       | 0.0000        | 0.0000    |
| 3779 | 8014702 | MLLT6         | 0.0000     | 0.0000        | 0.0000        | 0.1483    |
| 3780 | 8122732 | ---           | 0.0000     | 0.1483        | 0.0000        | -0.0547   |

| #    | ID      | Name     | SDHB.score | SDHD-AT.score | SDHD-HN.score | VHL.score |
|------|---------|----------|------------|---------------|---------------|-----------|
| 3781 | 7950409 | KCNE3    | 0.0000     | -0.0300       | 0.0000        | 0.1483    |
| 3782 | 8037888 | SLC8A2   | 0.0000     | 0.0800        | 0.0000        | -0.1482   |
| 3783 | 8098103 | FNIP2    | 0.1480     | 0.0000        | 0.0000        | -0.1445   |
| 3784 | 7945894 | ---      | 0.0000     | -0.1480       | 0.0000        | 0.0000    |
| 3785 | 7961151 | KLRK1    | -0.0693    | -0.0112       | 0.1480        | 0.0065    |
| 3786 | 7896150 | ---      | 0.0000     | -0.1480       | 0.0000        | 0.1098    |
| 3787 | 7943282 | KDM4D    | 0.1480     | 0.0000        | 0.0000        | -0.1190   |
| 3788 | 7900792 | PTPRF    | 0.0000     | 0.0000        | -0.0786       | 0.1480    |
| 3789 | 8001876 | NAE1     | 0.0000     | 0.0000        | 0.0000        | -0.1479   |
| 3790 | 8075462 | SELM     | 0.0000     | 0.1456        | 0.0000        | -0.1479   |
| 3791 | 7901613 | ACOT11   | 0.0000     | 0.0000        | -0.1478       | 0.0000    |
| 3792 | 7994769 | CORO1A   | 0.0000     | 0.0000        | 0.1476        | 0.0000    |
| 3793 | 8103822 | VEGFC    | -0.0521    | 0.0000        | 0.1476        | 0.0000    |
| 3794 | 8105908 | OCLN     | 0.0000     | 0.1476        | 0.0000        | -0.0672   |
| 3795 | 8104079 | FAT1     | -0.0587    | 0.0000        | 0.1476        | 0.0000    |
| 3796 | 7896721 | ---      | -0.0721    | 0.0000        | 0.1475        | 0.0000    |
| 3797 | 8093665 | GRK4     | 0.0000     | 0.0000        | 0.0000        | 0.1475    |
| 3798 | 7894163 | ---      | 0.0000     | 0.1475        | 0.0000        | -0.0057   |
| 3799 | 7915227 | SNORA55  | 0.0000     | 0.0000        | 0.0000        | 0.1474    |
| 3800 | 8155284 | FRMPD1   | 0.1473     | 0.0000        | 0.0000        | -0.0499   |
| 3801 | 7914764 | ZMYM6    | -0.1473    | 0.0000        | 0.0000        | 0.0283    |
| 3802 | 8003611 | FAM57A   | 0.0118     | -0.1472       | 0.0000        | 0.0000    |
| 3803 | 8127656 | ---      | -0.0794    | 0.0000        | 0.1472        | 0.0000    |
| 3804 | 7942465 | MRPL48   | 0.0701     | 0.0000        | 0.0000        | -0.1472   |
| 3805 | 8053449 | TMEM150A | 0.0000     | 0.0000        | 0.0000        | -0.1472   |
| 3806 | 7920575 | PBXIP1   | 0.0000     | 0.0000        | -0.1472       | 0.1441    |
| 3807 | 8081686 | BOC      | 0.0000     | 0.0000        | 0.1470        | 0.0000    |
| 3808 | 8035842 | ZNF91    | 0.0000     | 0.1469        | 0.0000        | 0.0000    |
| 3809 | 8153903 | RPL8     | 0.0000     | 0.0342        | 0.0000        | -0.1468   |
| 3810 | 8168727 | ---      | -0.1394    | 0.0000        | 0.1467        | 0.0000    |
| 3811 | 8138045 | EIF2AK1  | 0.0838     | 0.1415        | -0.0504       | -0.1467   |
| 3812 | 7985053 | FBXO22   | 0.1467     | 0.0000        | 0.0000        | -0.1429   |
| 3813 | 8050591 | NDUFAF2  | 0.0000     | 0.0000        | 0.0000        | -0.1466   |
| 3814 | 8072757 | CSF2RB   | 0.0000     | 0.0000        | 0.1466        | 0.0000    |
| 3815 | 8081667 | SLC35A5  | -0.0222    | 0.0000        | 0.1466        | 0.0000    |
| 3816 | 8034631 | STX10    | 0.0000     | 0.0000        | 0.0000        | -0.1466   |
| 3817 | 7984588 | THSD4    | 0.0000     | 0.0000        | 0.1466        | 0.0000    |
| 3818 | 8077441 | BHLHE40  | 0.0000     | -0.1466       | 0.0000        | 0.0458    |
| 3819 | 8056943 | KIAA1715 | 0.1465     | 0.0000        | 0.0000        | -0.1252   |
| 3820 | 7894893 | ---      | -0.1465    | 0.0000        | 0.0000        | 0.1350    |
| 3821 | 8065254 | ---      | 0.0000     | 0.1465        | 0.0000        | -0.1010   |
| 3822 | 7954589 | REP15    | -0.1465    | 0.0000        | 0.0189        | 0.0674    |
| 3823 | 7914216 | SNORA16A | -0.0428    | 0.1464        | 0.0000        | 0.0000    |
| 3824 | 8015445 | NT5C3L   | 0.0000     | 0.0897        | 0.0000        | -0.1464   |
| 3825 | 7895380 | ---      | 0.0000     | 0.1463        | 0.0000        | 0.0000    |
| 3826 | 8025877 | LPPR2    | 0.0000     | 0.0000        | 0.0000        | -0.1463   |
| 3827 | 7982507 | TMEM85   | 0.0000     | 0.0070        | 0.0000        | -0.1462   |
| 3828 | 7940924 | PLCB3    | 0.1462     | 0.0000        | 0.0000        | -0.0508   |
| 3829 | 7974697 | DAAM1    | 0.0000     | 0.0000        | 0.1461        | 0.0000    |
| 3830 | 8137225 | REPIN1   | 0.0679     | 0.0000        | -0.1460       | 0.0000    |
| 3831 | 7918026 | EXTL2    | -0.1459    | 0.0000        | 0.0000        | 0.1171    |
| 3832 | 8110437 | RMND5B   | 0.1008     | 0.0000        | 0.0000        | -0.1459   |
| 3833 | 8024956 | HSD11B1L | 0.0000     | 0.0006        | 0.0000        | -0.1459   |
| 3834 | 8112327 | CKS1B    | 0.0000     | 0.0000        | -0.1459       | 0.0000    |
| 3835 | 8007561 | G6PC3    | 0.0000     | 0.1008        | 0.0000        | -0.1457   |
| 3836 | 8030944 | ZNF578   | 0.1457     | 0.0000        | 0.0000        | -0.0405   |
| 3837 | 8143919 | SMARCD3  | 0.0000     | 0.0000        | 0.0000        | -0.1456   |
| 3838 | 8138084 | ---      | -0.0265    | -0.1456       | 0.1227        | 0.0248    |
| 3839 | 8143341 | JHDM1D   | 0.0000     | -0.1455       | 0.0186        | 0.0000    |
| 3840 | 8074884 | ---      | 0.0000     | 0.1455        | 0.0000        | 0.0000    |
| 3841 | 7892578 | ---      | 0.0455     | 0.0000        | 0.0000        | -0.1454   |
| 3842 | 7955317 | ACCN2    | 0.1412     | 0.0000        | 0.0000        | -0.1454   |

| #    | ID      | Name      | SDHB.score | SDHD-AT.score | SDHD-HN.score | VHL.score |
|------|---------|-----------|------------|---------------|---------------|-----------|
| 3843 | 7971296 | EPSTI1    | -0.0664    | -0.0272       | 0.1454        | 0.0115    |
| 3844 | 7901931 | EFCAB7    | -0.1454    | 0.0000        | 0.0000        | 0.0000    |
| 3845 | 8000706 | CDIPT     | 0.0000     | 0.0000        | 0.0000        | -0.1453   |
| 3846 | 7908968 | LAX1      | 0.0000     | 0.0000        | 0.1453        | 0.0000    |
| 3847 | 7944302 | PHLDB1    | 0.0000     | -0.1453       | 0.1142        | 0.0000    |
| 3848 | 8168028 | STARD8    | -0.1266    | 0.0000        | 0.1453        | 0.0000    |
| 3849 | 7916024 | TTC39A    | 0.0000     | 0.1452        | 0.0000        | -0.0050   |
| 3850 | 7899703 | TXLNA     | -0.1452    | 0.0000        | 0.0000        | 0.0927    |
| 3851 | 8095362 | MT2A      | -0.0760    | 0.0000        | 0.0000        | 0.1451    |
| 3852 | 8027205 | NDUFA13   | 0.0000     | 0.1451        | 0.0000        | -0.0359   |
| 3853 | 8161558 | AQP7P1    | -0.0924    | 0.0000        | 0.0000        | 0.1451    |
| 3854 | 7897172 | TPRG1L    | -0.1138    | 0.0000        | 0.0000        | 0.1451    |
| 3855 | 7987172 | C15orf24  | 0.0000     | 0.1115        | 0.0000        | -0.1450   |
| 3856 | 8022559 | ANKRD29   | 0.0000     | 0.0856        | -0.1449       | 0.0000    |
| 3857 | 8180296 | ---       | -0.1449    | 0.0000        | 0.0000        | 0.0992    |
| 3858 | 8061136 | PTMA      | 0.0000     | -0.0666       | 0.1448        | 0.0000    |
| 3859 | 8016402 | CBX1      | 0.1040     | 0.0000        | 0.0000        | -0.1446   |
| 3860 | 8064302 | PCMTD2    | 0.0000     | 0.0000        | 0.0000        | 0.1445    |
| 3861 | 7901788 | NFIA      | -0.1209    | -0.0187       | 0.0455        | 0.1445    |
| 3862 | 7893913 | ---       | 0.0000     | 0.1444        | 0.0000        | -0.0425   |
| 3863 | 7975344 | SLC39A9   | 0.1443     | 0.0000        | 0.0000        | -0.1093   |
| 3864 | 7970949 | MAB21L1   | 0.0257     | 0.0745        | 0.0000        | -0.1443   |
| 3865 | 7911870 | KIAA0562  | -0.1443    | 0.0000        | 0.0000        | 0.1081    |
| 3866 | 8105935 | POM121L8P | -0.1442    | 0.0000        | 0.1198        | 0.0000    |
| 3867 | 8014316 | CCL5      | 0.0000     | 0.0000        | 0.1440        | 0.0000    |
| 3868 | 8112668 | GCNT4     | 0.0000     | 0.0000        | 0.1440        | 0.0000    |
| 3869 | 7953715 | NECAP1    | 0.0313     | 0.1294        | 0.0000        | -0.1440   |
| 3870 | 8143035 | ---       | 0.1405     | 0.0000        | 0.0000        | -0.1439   |
| 3871 | 8157727 | GPR21     | 0.0000     | 0.0000        | 0.1438        | 0.0000    |
| 3872 | 8002571 | PHLPP2    | 0.1438     | 0.0000        | 0.0000        | -0.0671   |
| 3873 | 8103975 | UNQ9368   | 0.0000     | 0.0000        | 0.0000        | 0.1438    |
| 3874 | 7977611 | ---       | 0.0000     | -0.1438       | 0.0000        | 0.0682    |
| 3875 | 8173373 | PDZD11    | 0.0000     | 0.1438        | 0.0000        | -0.0101   |
| 3876 | 8133788 | PTPN12    | -0.1153    | 0.0000        | 0.1437        | 0.0112    |
| 3877 | 8180294 | ---       | -0.1437    | 0.0000        | 0.0000        | 0.1006    |
| 3878 | 7962625 | RAPGEF3   | 0.0000     | 0.0000        | 0.1436        | 0.0000    |
| 3879 | 8031483 | RPL28     | 0.0000     | 0.0000        | 0.0000        | -0.1436   |
| 3880 | 7994006 | SMG1      | 0.0000     | -0.1436       | 0.0000        | 0.0658    |
| 3881 | 8145768 | ---       | 0.0092     | 0.1240        | -0.1436       | 0.0000    |
| 3882 | 8083034 | CLSTN2    | 0.1436     | 0.0000        | 0.0000        | -0.0719   |
| 3883 | 7894507 | ---       | 0.0000     | 0.1436        | 0.0000        | -0.0579   |
| 3884 | 8179451 | PPT2      | -0.1436    | 0.0000        | 0.0000        | 0.0047    |
| 3885 | 7898112 | ---       | -0.0960    | 0.0000        | 0.0000        | 0.1435    |
| 3886 | 7918275 | WDR47     | -0.1435    | 0.0000        | 0.0000        | 0.0000    |
| 3887 | 8076195 | PDGFB     | -0.0490    | -0.0590       | 0.0000        | 0.1434    |
| 3888 | 8056710 | C2orf77   | -0.0073    | 0.0000        | 0.0000        | 0.1433    |
| 3889 | 7895767 | ---       | 0.1095     | -0.0919       | -0.1432       | 0.0000    |
| 3890 | 7950005 | MRGPRF    | 0.0000     | 0.0000        | 0.1432        | 0.0000    |
| 3891 | 8072584 | ---       | 0.0000     | 0.1432        | 0.0000        | -0.0315   |
| 3892 | 7944042 | PAFAH1B2  | 0.1432     | 0.0000        | 0.0000        | 0.0000    |
| 3893 | 7978748 | FBXO33    | 0.0469     | 0.0000        | 0.0000        | -0.1430   |
| 3894 | 7912257 | CLSTN1    | -0.1429    | 0.1403        | 0.0000        | 0.0041    |
| 3895 | 7948782 | UBXN1     | 0.1429     | 0.0000        | 0.0000        | -0.1066   |
| 3896 | 8083457 | RAP2B     | 0.0000     | 0.0000        | 0.1429        | 0.0000    |
| 3897 | 7903703 | GNAI3     | -0.1428    | 0.0000        | 0.0000        | 0.0000    |
| 3898 | 8180289 | ---       | -0.1403    | 0.0000        | 0.0000        | 0.1427    |
| 3899 | 7976834 | ---       | 0.0000     | 0.0000        | -0.1427       | 0.0000    |
| 3900 | 8113724 | ---       | 0.0000     | 0.0000        | 0.1427        | -0.0898   |
| 3901 | 8080926 | ARL6IP5   | 0.0000     | 0.0000        | 0.0454        | -0.1427   |
| 3902 | 7972334 | ---       | 0.0000     | 0.1425        | 0.0000        | 0.0000    |
| 3903 | 7927071 | ZNF37A    | 0.0000     | 0.0000        | -0.1425       | 0.0000    |
| 3904 | 8139256 | URG4      | 0.0000     | 0.0000        | -0.1425       | 0.0000    |

| #    | ID      | Name     | SDHB.score | SDHD-AT.score | SDHD-HN.score | VHL.score |
|------|---------|----------|------------|---------------|---------------|-----------|
| 3905 | 8160587 | NDUFB6   | 0.0000     | 0.1425        | 0.0000        | -0.0387   |
| 3906 | 8118509 | PPT2     | -0.1424    | 0.0000        | 0.0000        | 0.0006    |
| 3907 | 8043218 | USP39    | 0.0000     | 0.0000        | 0.0000        | -0.1424   |
| 3908 | 7948881 | WDR74    | 0.1383     | 0.0000        | 0.0000        | -0.1423   |
| 3909 | 7896201 | ---      | 0.0000     | 0.0000        | 0.0000        | -0.1423   |
| 3910 | 8173181 | SPIN3    | 0.0000     | 0.1422        | 0.0000        | 0.0000    |
| 3911 | 7933842 | TMEM26   | 0.0000     | 0.0000        | 0.1422        | 0.0000    |
| 3912 | 8036252 | CLIP3    | 0.0670     | 0.0575        | 0.0000        | -0.1422   |
| 3913 | 8116740 | RREB1    | -0.0141    | 0.0000        | 0.0000        | 0.1422    |
| 3914 | 7910923 | FMN2     | 0.0894     | 0.0000        | -0.1422       | 0.0000    |
| 3915 | 8179238 | MICA     | -0.1421    | 0.0000        | 0.1097        | 0.0000    |
| 3916 | 7974316 | FRMD6    | 0.0000     | 0.0000        | 0.1421        | 0.0000    |
| 3917 | 8091523 | P2RY13   | -0.1421    | 0.0000        | 0.0110        | 0.0000    |
| 3918 | 7943126 | KIAA1731 | 0.1420     | 0.0000        | 0.0000        | 0.0000    |
| 3919 | 7893093 | ---      | 0.0382     | 0.0000        | -0.1420       | 0.0000    |
| 3920 | 7985134 | IDH3A    | 0.1218     | 0.0000        | 0.0000        | -0.1420   |
| 3921 | 7893201 | ---      | 0.0000     | 0.0917        | 0.0000        | -0.1419   |
| 3922 | 7893153 | ---      | 0.0000     | -0.1419       | 0.0000        | 0.0000    |
| 3923 | 8137670 | PDGFA    | -0.0344    | -0.0549       | 0.1418        | 0.0000    |
| 3924 | 8048460 | CDK5R2   | 0.1418     | 0.0000        | 0.0000        | -0.0991   |
| 3925 | 7959195 | CABP1    | 0.0000     | 0.0000        | 0.0000        | 0.1418    |
| 3926 | 8098348 | KIAA1712 | 0.0000     | 0.1417        | 0.0000        | 0.0000    |
| 3927 | 8116992 | ---      | -0.1394    | 0.0000        | 0.0000        | 0.1417    |
| 3928 | 8115210 | TNIP1    | -0.0225    | 0.0000        | 0.0000        | 0.1417    |
| 3929 | 7982341 | CHRNA7   | 0.0581     | 0.0037        | 0.0000        | -0.1416   |
| 3930 | 7894030 | ---      | 0.0000     | 0.0000        | 0.0000        | 0.1416    |
| 3931 | 8180346 | ---      | 0.0000     | 0.0000        | 0.1415        | 0.0000    |
| 3932 | 7895624 | ---      | 0.0000     | 0.0000        | 0.0000        | -0.1415   |
| 3933 | 8058127 | CLK1     | -0.0322    | 0.0000        | 0.0000        | 0.1415    |
| 3934 | 7904695 | SEC22B   | -0.1415    | 0.1246        | 0.0000        | 0.0000    |
| 3935 | 8000409 | HMG2     | -0.1415    | 0.0000        | 0.0000        | 0.0000    |
| 3936 | 8029693 | FOSB     | -0.1172    | 0.0000        | 0.0000        | 0.1415    |
| 3937 | 8011542 | ZZEF1    | 0.0000     | -0.1414       | 0.0000        | 0.0000    |
| 3938 | 7908966 | C1orf217 | -0.1045    | -0.1414       | 0.1142        | 0.1362    |
| 3939 | 7919340 | GJA5     | -0.1413    | 0.0000        | 0.0235        | 0.0000    |
| 3940 | 8143702 | ZNF425   | 0.0103     | 0.0000        | 0.0000        | -0.1412   |
| 3941 | 8016390 | COPZ2    | 0.0000     | -0.1412       | 0.1006        | 0.0000    |
| 3942 | 7898227 | PLEKHM2  | -0.1138    | 0.0000        | 0.1411        | 0.0000    |
| 3943 | 8068105 | BACH1    | -0.0190    | 0.0000        | 0.1411        | 0.0000    |
| 3944 | 8075130 | PITPNB   | 0.0000     | 0.0000        | 0.0000        | 0.1410    |
| 3945 | 7916274 | MAGOH    | -0.1410    | 0.0000        | 0.0211        | 0.0000    |
| 3946 | 7919160 | ---      | 0.0000     | 0.0000        | 0.1410        | 0.0000    |
| 3947 | 7901460 | GPX7     | -0.1408    | 0.0000        | 0.0000        | 0.0000    |
| 3948 | 7895759 | ---      | 0.1408     | 0.0000        | 0.0000        | 0.0000    |
| 3949 | 8089926 | ---      | -0.1408    | 0.0000        | 0.0670        | 0.0994    |
| 3950 | 7979510 | SIX4     | 0.0393     | 0.0000        | 0.0000        | -0.1407   |
| 3951 | 8029617 | GEMIN7   | 0.0000     | 0.0000        | 0.0000        | -0.1407   |
| 3952 | 7944603 | GRIK4    | 0.1135     | 0.0000        | 0.0000        | -0.1407   |
| 3953 | 7965767 | ---      | 0.0000     | 0.1406        | 0.0000        | 0.0000    |
| 3954 | 8104625 | ---      | 0.0000     | 0.0000        | -0.0135       | 0.1406    |
| 3955 | 8003149 | KCNG4    | 0.0263     | 0.0000        | -0.1405       | 0.0000    |
| 3956 | 8157246 | KIAA1958 | 0.0000     | 0.0000        | -0.1405       | 0.0000    |
| 3957 | 8139482 | SNORA5A  | 0.0000     | 0.0000        | -0.1404       | 0.0000    |
| 3958 | 7894774 | ---      | 0.0000     | 0.1404        | 0.0000        | -0.0997   |
| 3959 | 8101659 | SPARCL1  | -0.1311    | 0.0000        | 0.1404        | 0.0423    |
| 3960 | 8044133 | NCK2     | 0.0000     | 0.0000        | 0.1404        | 0.0000    |
| 3961 | 8035765 | ZNF14    | 0.0000     | 0.1402        | 0.0000        | 0.0000    |
| 3962 | 8088192 | ERC2     | 0.0000     | 0.0000        | 0.0022        | -0.1401   |
| 3963 | 7892597 | ---      | 0.0000     | 0.0000        | 0.1401        | 0.0000    |
| 3964 | 7939818 | PTPMT1   | 0.0073     | 0.0000        | 0.0000        | -0.1400   |
| 3965 | 7999598 | NTAN1    | 0.0000     | 0.0000        | 0.1400        | 0.0000    |
| 3966 | 8143759 | ATP6V0E2 | 0.1399     | 0.0000        | -0.0837       | -0.0963   |



| #    | ID      | Name      | SDHB.score | SDHD-AT.score | SDHD-HN.score | VHL.score |
|------|---------|-----------|------------|---------------|---------------|-----------|
| 3967 | 7943297 | CEP57     | 0.1399     | 0.0000        | 0.0000        | -0.0067   |
| 3968 | 7958051 | ASCL1     | 0.0000     | 0.0000        | 0.1397        | 0.0000    |
| 3969 | 8161747 | ZFAND5    | 0.0000     | 0.0000        | 0.0000        | 0.1397    |
| 3970 | 7901479 | ZYG11B    | -0.1397    | 0.0000        | 0.0000        | 0.1252    |
| 3971 | 7975687 | LIN52     | 0.0000     | 0.1396        | 0.0000        | 0.0000    |
| 3972 | 8053447 | ---       | 0.0000     | 0.1395        | 0.0000        | -0.0889   |
| 3973 | 8056763 | ---       | 0.0000     | 0.0807        | 0.0000        | -0.1394   |
| 3974 | 7973865 | ---       | 0.0364     | 0.0000        | -0.1394       | 0.0000    |
| 3975 | 8094259 | LAP3      | -0.1011    | 0.0000        | 0.1393        | 0.0108    |
| 3976 | 7952205 | MCAM      | 0.0000     | -0.1393       | 0.0000        | 0.0000    |
| 3977 | 8097867 | KIAA0922  | -0.1072    | 0.0000        | 0.0000        | 0.1393    |
| 3978 | 8011747 | SLC25A11  | 0.0477     | 0.0000        | 0.0000        | -0.1393   |
| 3979 | 8008588 | HLF       | 0.1200     | 0.0660        | -0.0876       | -0.1392   |
| 3980 | 8123524 | EXOC2     | 0.0000     | 0.0000        | 0.0000        | -0.1391   |
| 3981 | 7979250 | CNIH      | 0.0385     | 0.0000        | 0.0000        | -0.1391   |
| 3982 | 7892575 | ---       | -0.0562    | 0.0000        | 0.0000        | 0.1391    |
| 3983 | 8107847 | KIAA1024L | 0.0000     | 0.1390        | -0.0638       | 0.0000    |
| 3984 | 8121916 | RSPO3     | -0.1389    | 0.0000        | 0.0000        | 0.0116    |
| 3985 | 7989037 | CCPG1     | 0.0150     | 0.0000        | 0.0000        | -0.1389   |
| 3986 | 7903619 | SARS      | 0.0000     | 0.1389        | 0.0000        | 0.0000    |
| 3987 | 8037614 | GPR4      | -0.0762    | -0.0292       | 0.1388        | 0.0300    |
| 3988 | 7893184 | ---       | 0.0000     | 0.0000        | 0.0000        | -0.1388   |
| 3989 | 8076185 | CBX7      | 0.0000     | 0.1388        | 0.0000        | 0.0000    |
| 3990 | 7950578 | PAK1      | 0.1386     | 0.0000        | 0.0000        | 0.0000    |
| 3991 | 8154779 | SPINK4    | 0.0000     | 0.0968        | 0.0000        | -0.1386   |
| 3992 | 7896047 | ---       | 0.0018     | 0.0080        | 0.0000        | -0.1386   |
| 3993 | 8141648 | ACHE      | 0.1384     | 0.0000        | -0.1363       | -0.1000   |
| 3994 | 7925492 | OPN3      | -0.1118    | 0.0000        | 0.1384        | 0.0000    |
| 3995 | 8114843 | ---       | 0.0000     | 0.0506        | 0.0000        | -0.1383   |
| 3996 | 7917944 | ---       | 0.0000     | 0.1383        | 0.0000        | 0.0000    |
| 3997 | 8024436 | OAZ1      | 0.0000     | 0.1382        | 0.0000        | -0.0730   |
| 3998 | 8091778 | SCARNA7   | -0.1381    | 0.0000        | 0.0748        | 0.0000    |
| 3999 | 7913156 | AKR7A2    | 0.0000     | 0.1381        | 0.0000        | 0.0000    |
| 4000 | 7923503 | ADIPOR1   | 0.1287     | 0.0282        | -0.0806       | -0.1381   |
| 4001 | 7936516 | HSPA12A   | 0.0000     | 0.0000        | 0.0000        | 0.1381    |
| 4002 | 7972713 | EFNB2     | -0.1381    | 0.0000        | 0.0000        | 0.1346    |
| 4003 | 8010747 | GPS1      | 0.0000     | 0.0000        | 0.0000        | -0.1381   |
| 4004 | 7899377 | PPP1R8    | -0.1380    | 0.0000        | 0.0000        | 0.0000    |
| 4005 | 8172531 | PRAF2     | 0.0000     | 0.1357        | 0.0000        | -0.1380   |
| 4006 | 8135876 | SND1      | 0.0096     | 0.0000        | -0.1380       | 0.0000    |
| 4007 | 7896067 | ---       | 0.0000     | 0.0000        | 0.0000        | -0.1379   |
| 4008 | 8101675 | ABCG2     | -0.1333    | 0.0000        | 0.0000        | 0.1379    |
| 4009 | 7914433 | BAI2      | 0.0000     | 0.1379        | 0.0000        | 0.0000    |
| 4010 | 8016578 | SLC35B1   | 0.0402     | 0.1378        | 0.0000        | -0.1338   |
| 4011 | 7972259 | DCT       | 0.0000     | 0.1378        | 0.0000        | 0.0000    |
| 4012 | 7933632 | ---       | 0.0000     | -0.1378       | 0.0000        | 0.0000    |
| 4013 | 8180337 | ---       | 0.0000     | 0.0000        | 0.0000        | -0.1378   |
| 4014 | 7945688 | INS-IGF2  | 0.0000     | 0.0000        | -0.1377       | 0.0000    |
| 4015 | 8110631 | BTNL9     | 0.0000     | 0.0000        | 0.0000        | 0.1376    |
| 4016 | 7961654 | RECQL     | -0.0483    | 0.0000        | 0.1376        | 0.0000    |
| 4017 | 7940959 | GPR137    | 0.1376     | 0.0000        | 0.0000        | -0.0812   |
| 4018 | 8019930 | MYL12B    | -0.0145    | 0.0000        | 0.1376        | 0.0000    |
| 4019 | 7990815 | ST20      | 0.0000     | 0.1375        | 0.0000        | -0.0811   |
| 4020 | 7893587 | ---       | 0.1374     | 0.0000        | 0.0000        | 0.0000    |
| 4021 | 8147828 | ---       | 0.1374     | 0.0000        | -0.0495       | 0.0000    |
| 4022 | 7956038 | MMP19     | -0.1161    | 0.0000        | 0.1374        | 0.0000    |
| 4023 | 8002492 | HYDIN     | 0.0000     | 0.0000        | -0.0943       | 0.1374    |
| 4024 | 7945536 | CEND1     | 0.0414     | 0.0000        | 0.0000        | -0.1373   |
| 4025 | 8011141 | PRPF8     | 0.0879     | -0.1373       | 0.0000        | 0.0000    |
| 4026 | 8113250 | ERAP1     | 0.0000     | -0.1370       | 0.0000        | 0.0000    |
| 4027 | 8019316 | PYCR1     | 0.0000     | 0.0552        | 0.0000        | -0.1370   |
| 4028 | 7928489 | ---       | -0.0170    | -0.0520       | 0.0000        | 0.1370    |

| #    | ID      | Name       | SDHB.score | SDHD-AT.score | SDHD-HN.score | VHL.score |
|------|---------|------------|------------|---------------|---------------|-----------|
| 4029 | 8162086 | AGTPBP1    | -0.0553    | 0.0000        | 0.0000        | 0.1370    |
| 4030 | 8070239 | HLCS       | 0.0000     | 0.0000        | -0.1370       | 0.0000    |
| 4031 | 7912762 | ---        | 0.0000     | 0.1369        | 0.0000        | 0.0000    |
| 4032 | 8130641 | C6orf59    | 0.0000     | 0.0000        | 0.0000        | 0.1369    |
| 4033 | 8059648 | ---        | 0.0000     | 0.0000        | 0.0000        | -0.1369   |
| 4034 | 7996219 | NDRG4      | 0.0863     | 0.0628        | -0.0131       | -0.1369   |
| 4035 | 8098782 | CPLX1      | 0.0271     | 0.0000        | 0.0000        | -0.1368   |
| 4036 | 7979574 | SGPP1      | 0.0000     | 0.0000        | 0.0000        | -0.1366   |
| 4037 | 8016473 | HOXB8      | 0.1366     | 0.0000        | -0.0430       | 0.0000    |
| 4038 | 7973306 | ABHD4      | 0.0000     | 0.0378        | 0.0000        | -0.1366   |
| 4039 | 8042962 | MRPL19     | 0.0000     | 0.0000        | 0.0000        | -0.1364   |
| 4040 | 8124574 | ZSCAN12    | 0.1364     | 0.0000        | -0.0573       | 0.0000    |
| 4041 | 8137639 | WDR60      | 0.0000     | 0.0000        | 0.0000        | 0.1364    |
| 4042 | 8040614 | ---        | 0.0852     | 0.0000        | 0.0000        | -0.1364   |
| 4043 | 7900833 | KDM4A      | -0.1363    | 0.0000        | 0.0000        | 0.0101    |
| 4044 | 7951133 | MAML2      | 0.0000     | -0.0644       | 0.1363        | 0.0000    |
| 4045 | 8137081 | ---        | 0.1363     | 0.0000        | 0.0000        | 0.0000    |
| 4046 | 8037594 | RTN2       | 0.0331     | 0.0000        | 0.0000        | -0.1362   |
| 4047 | 7989924 | SNAPC5     | 0.0000     | 0.0000        | 0.0000        | -0.1362   |
| 4048 | 8012226 | FXR2       | 0.1362     | 0.0000        | 0.0000        | -0.0137   |
| 4049 | 8048026 | CPS1       | 0.0000     | 0.0000        | 0.0101        | -0.1361   |
| 4050 | 8088908 | ---        | 0.0982     | 0.0259        | -0.0137       | -0.1360   |
| 4051 | 7897509 | NMNAT1     | -0.1360    | 0.0000        | 0.0000        | 0.0000    |
| 4052 | 7896546 | ---        | 0.0327     | 0.1323        | -0.1359       | -0.0191   |
| 4053 | 7910372 | RNF187     | 0.0000     | 0.0000        | 0.0000        | -0.1359   |
| 4054 | 8011692 | PELP1      | 0.1358     | 0.0000        | 0.0000        | -0.0236   |
| 4055 | 8061035 | MACROD2    | 0.1357     | 0.0000        | 0.0000        | -0.1266   |
| 4056 | 7896308 | ---        | 0.0000     | 0.0000        | -0.1357       | 0.0000    |
| 4057 | 8130464 | C6orf35    | 0.0000     | 0.1357        | 0.0000        | 0.0000    |
| 4058 | 7941311 | SIPA1      | -0.0150    | 0.0000        | 0.1357        | 0.0000    |
| 4059 | 8171561 | SCML2      | 0.1161     | 0.0000        | -0.1356       | -0.0302   |
| 4060 | 7978335 | SDR39U1    | 0.0000     | 0.0000        | -0.1356       | 0.0000    |
| 4061 | 7893549 | ---        | 0.0000     | 0.0000        | 0.0000        | -0.1355   |
| 4062 | 8005755 | ---        | 0.0000     | 0.1354        | 0.0000        | 0.0000    |
| 4063 | 7976816 | SNORD114-3 | 0.0000     | 0.0000        | -0.1354       | 0.1058    |
| 4064 | 8081171 | CRYBG3     | 0.0000     | -0.0018       | 0.1353        | 0.0000    |
| 4065 | 7901046 | SNORD55    | -0.0890    | 0.1353        | 0.0000        | 0.0000    |
| 4066 | 7993622 | ITPRIPL2   | 0.0000     | 0.0000        | 0.1352        | 0.0000    |
| 4067 | 7910369 | HIST3H2BB  | 0.0000     | 0.1352        | -0.1039       | 0.0000    |
| 4068 | 8060503 | SNORD57    | 0.0000     | 0.0000        | 0.0000        | 0.1351    |
| 4069 | 8096489 | PDLIM5     | -0.0135    | -0.0092       | 0.0000        | 0.1351    |
| 4070 | 8039491 | UBE2S      | 0.0082     | 0.0000        | 0.0000        | -0.1350   |
| 4071 | 8035880 | UQCRRS1    | 0.0000     | 0.0000        | 0.0000        | -0.1350   |
| 4072 | 7964021 | RNF41      | 0.0000     | 0.0670        | 0.0000        | -0.1350   |
| 4073 | 7896726 | ---        | 0.0000     | 0.0000        | 0.1350        | 0.0000    |
| 4074 | 8153704 | SCRT1      | 0.0983     | 0.0000        | 0.0000        | -0.1350   |
| 4075 | 7940840 | OTUB1      | 0.1349     | 0.0000        | 0.0000        | -0.0707   |
| 4076 | 7903777 | GSTM5      | -0.0344    | 0.0000        | 0.1349        | 0.0000    |
| 4077 | 8013641 | PIGS       | 0.0000     | 0.1349        | 0.0000        | -0.0094   |
| 4078 | 8116818 | BMP6       | -0.0865    | 0.0000        | 0.1348        | 0.0000    |
| 4079 | 7982204 | HMGN2      | -0.1348    | 0.0000        | 0.0000        | 0.0000    |
| 4080 | 8173917 | NAP1L3     | 0.1348     | 0.0000        | -0.0802       | -0.1325   |
| 4081 | 7895818 | ---        | 0.0000     | 0.0000        | 0.0000        | -0.1348   |
| 4082 | 8007607 | RUNDC3A    | 0.0000     | 0.1197        | -0.1348       | 0.0000    |
| 4083 | 8008780 | ---        | 0.1348     | 0.0000        | 0.0000        | -0.1026   |
| 4084 | 8151066 | ARMC1      | 0.0000     | 0.0916        | 0.0000        | -0.1347   |
| 4085 | 7981514 | AHNAK2     | 0.0863     | -0.1347       | 0.0000        | -0.0590   |
| 4086 | 8077513 | THUMPD3    | 0.0008     | 0.0000        | 0.0000        | -0.1347   |
| 4087 | 8098167 | C4orf39    | 0.1344     | 0.0000        | 0.0000        | 0.0000    |
| 4088 | 8020919 | C18orf21   | 0.0000     | 0.0688        | 0.0000        | -0.1344   |
| 4089 | 8074108 | MAPK8IP2   | 0.0824     | 0.0544        | -0.0020       | -0.1344   |
| 4090 | 8000638 | SMG1       | 0.0000     | -0.1344       | 0.0000        | 0.1022    |

| #    | ID      | Name      | SDHB.score | SDHD-AT.score | SDHD-HN.score | VHL.score |
|------|---------|-----------|------------|---------------|---------------|-----------|
| 4091 | 8064967 | MKKS      | 0.0000     | 0.0000        | 0.0000        | -0.1343   |
| 4092 | 7919751 | MCL1      | -0.0916    | -0.0249       | 0.0009        | 0.1343    |
| 4093 | 7928046 | TSPAN15   | -0.1126    | 0.0000        | 0.1342        | 0.0000    |
| 4094 | 7998835 | ---       | 0.0476     | 0.0000        | -0.1342       | 0.0000    |
| 4095 | 8093456 | C4orf42   | 0.1342     | 0.0000        | 0.0000        | -0.1024   |
| 4096 | 7924205 | ---       | 0.1342     | 0.0000        | -0.1327       | -0.0166   |
| 4097 | 7986639 | VSIG6     | 0.0000     | -0.0780       | 0.1342        | 0.0000    |
| 4098 | 8042079 | CCDC85A   | 0.0000     | 0.0000        | 0.1341        | 0.0000    |
| 4099 | 8100085 | GNPDA2    | 0.0000     | 0.0464        | 0.0000        | -0.1341   |
| 4100 | 7896476 | ---       | 0.1341     | 0.0000        | 0.0000        | 0.0000    |
| 4101 | 8113352 | ---       | 0.0000     | 0.1340        | 0.0000        | 0.0000    |
| 4102 | 8161774 | TRPM6     | 0.0000     | 0.0000        | 0.1339        | 0.0000    |
| 4103 | 8131286 | RNF216L   | 0.0788     | 0.0000        | 0.0000        | -0.1339   |
| 4104 | 8046512 | ---       | 0.0000     | 0.0000        | 0.0000        | -0.1339   |
| 4105 | 8120082 | TDRD6     | -0.0056    | 0.0000        | 0.0000        | 0.1339    |
| 4106 | 8079677 | P4HTM     | 0.0000     | 0.1338        | 0.0000        | 0.0000    |
| 4107 | 7941694 | RBM14     | 0.1338     | 0.0000        | 0.0000        | 0.0000    |
| 4108 | 7941976 | NDUFS8    | 0.0927     | 0.0000        | 0.0000        | -0.1338   |
| 4109 | 8017704 | FLJ32065  | 0.0000     | 0.1338        | 0.0000        | -0.0965   |
| 4110 | 7895835 | ---       | 0.0000     | 0.0000        | 0.0000        | 0.1337    |
| 4111 | 8122561 | C6orf103  | 0.0000     | 0.0000        | 0.0000        | 0.1337    |
| 4112 | 8012918 | CDRT4     | 0.0000     | 0.0000        | -0.1336       | 0.0000    |
| 4113 | 8143605 | FAM115A   | 0.1336     | 0.0000        | -0.0561       | -0.0990   |
| 4114 | 8147777 | CTHRC1    | 0.0000     | 0.0000        | 0.1335        | 0.0000    |
| 4115 | 8001750 | SLC38A7   | 0.0000     | 0.0000        | 0.0000        | -0.1335   |
| 4116 | 8134730 | CNPY4     | 0.0287     | 0.0000        | 0.0000        | -0.1334   |
| 4117 | 8118622 | HSD17B8   | 0.1334     | 0.0000        | 0.0000        | -0.0170   |
| 4118 | 7906244 | NTRK1     | 0.0000     | 0.0000        | -0.1333       | 0.0082    |
| 4119 | 7894713 | ---       | 0.1332     | 0.0000        | 0.0000        | -0.0093   |
| 4120 | 8057056 | TTN       | -0.0274    | -0.1138       | 0.0000        | 0.1331    |
| 4121 | 7918825 | CSDE1     | -0.1331    | 0.0000        | 0.0000        | 0.0000    |
| 4122 | 7898556 | PQLC2     | 0.0000     | 0.1331        | 0.0000        | 0.0000    |
| 4123 | 7909628 | FLVCR1    | 0.0665     | 0.0000        | -0.1331       | 0.0000    |
| 4124 | 8158664 | ---       | 0.0000     | 0.0000        | 0.1331        | 0.0000    |
| 4125 | 8045848 | UPP2      | 0.0000     | 0.0000        | -0.1330       | 0.0787    |
| 4126 | 8010686 | ANAPC11   | 0.0000     | 0.0334        | 0.0000        | -0.1330   |
| 4127 | 8064451 | SIRPB2    | -0.0138    | 0.0000        | 0.1329        | 0.0000    |
| 4128 | 8007904 | GOSR2     | 0.0424     | 0.0000        | 0.0000        | -0.1329   |
| 4129 | 7995096 | ITGAM     | -0.0810    | 0.0000        | 0.1328        | 0.0000    |
| 4130 | 8054356 | MFSD9     | 0.0000     | 0.0000        | 0.0000        | -0.1328   |
| 4131 | 7914996 | MEAF6     | 0.0000     | 0.1328        | 0.0000        | 0.0000    |
| 4132 | 7894315 | ---       | 0.0000     | 0.0000        | 0.0000        | -0.1328   |
| 4133 | 7896082 | ---       | 0.0000     | 0.0000        | 0.0000        | -0.1327   |
| 4134 | 7920047 | MRPL9     | 0.0000     | 0.0000        | 0.0000        | -0.1327   |
| 4135 | 8065136 | RRBP1     | 0.0000     | -0.1326       | 0.0000        | 0.0880    |
| 4136 | 7905428 | TUFT1     | 0.0000     | 0.0027        | -0.1326       | 0.0000    |
| 4137 | 8072645 | HMGXB4    | 0.0000     | 0.0000        | 0.0000        | -0.1326   |
| 4138 | 7904340 | MAN1A2    | -0.1326    | 0.0000        | 0.0000        | 0.0000    |
| 4139 | 8083092 | ZBTB38    | -0.1326    | 0.0000        | 0.0000        | 0.0536    |
| 4140 | 7941364 | PCNXL3    | 0.1325     | 0.0000        | 0.0000        | 0.0000    |
| 4141 | 7915543 | SLC6A9    | -0.1115    | 0.0000        | 0.0000        | 0.1325    |
| 4142 | 8030374 | FCGRT     | 0.0000     | 0.0000        | 0.1324        | 0.0000    |
| 4143 | 8116534 | TRIM52    | 0.0000     | 0.0000        | -0.1324       | 0.0000    |
| 4144 | 8152668 | ATAD2     | 0.1323     | 0.0000        | 0.0000        | -0.1018   |
| 4145 | 8012207 | C17orf61  | 0.0000     | 0.0000        | 0.0000        | -0.1323   |
| 4146 | 7913252 | PINK1     | -0.0887    | 0.0000        | 0.0000        | 0.1323    |
| 4147 | 8064637 | C20orf194 | 0.0000     | -0.0309       | 0.0000        | 0.1322    |
| 4148 | 7983206 | TUBGCP4   | 0.0957     | 0.0179        | -0.0082       | -0.1322   |
| 4149 | 8174271 | RAB9B     | 0.0643     | 0.0000        | 0.0000        | -0.1322   |
| 4150 | 8180292 | ---       | -0.1275    | 0.0000        | 0.0000        | 0.1322    |
| 4151 | 8018511 | MRPL38    | 0.0000     | 0.1247        | 0.0000        | -0.1321   |
| 4152 | 7914042 | MAP3K6    | -0.1313    | 0.0000        | 0.1321        | 0.0000    |

| #    | ID      | Name         | SDHB.score | SDHD-AT.score | SDHD-HN.score | VHL.score |
|------|---------|--------------|------------|---------------|---------------|-----------|
| 4153 | 7996677 | NUTF2        | 0.0000     | 0.0000        | 0.0000        | -0.1321   |
| 4154 | 8035408 | PDE4C        | 0.0000     | 0.0000        | 0.0000        | 0.1320    |
| 4155 | 8122222 | PDE7B        | -0.1319    | 0.0000        | 0.0000        | 0.1032    |
| 4156 | 7952737 | ---          | 0.0000     | 0.0000        | 0.0000        | -0.1319   |
| 4157 | 8093451 | ---          | -0.0654    | 0.0000        | 0.0000        | 0.1319    |
| 4158 | 8092265 | MRPL47       | 0.0000     | 0.0033        | 0.0000        | -0.1318   |
| 4159 | 7950332 | C2CD3        | 0.0000     | -0.1318       | 0.0000        | 0.0000    |
| 4160 | 7956120 | ERBB3        | -0.1318    | 0.0000        | 0.0601        | 0.0000    |
| 4161 | 7905382 | ZNF687       | 0.1318     | 0.0000        | 0.0000        | -0.0960   |
| 4162 | 7895686 | ---          | 0.1317     | -0.0209       | 0.0000        | 0.0000    |
| 4163 | 7967863 | ZNF605       | 0.0000     | 0.0000        | -0.1317       | 0.0000    |
| 4164 | 7895728 | ---          | 0.0000     | -0.1316       | 0.0000        | 0.0319    |
| 4165 | 8012843 | ZNF18        | 0.0000     | -0.1315       | 0.0000        | 0.0000    |
| 4166 | 7981266 | CCDC85C      | 0.1314     | 0.0000        | -0.0884       | -0.0179   |
| 4167 | 7902512 | DNAJB4       | -0.1314    | 0.0000        | 0.0000        | 0.0181    |
| 4168 | 7948612 | FADS1        | 0.1314     | 0.0000        | 0.0000        | 0.0000    |
| 4169 | 8132589 | ---          | 0.0000     | 0.0116        | 0.0000        | -0.1313   |
| 4170 | 8140828 | SRI          | 0.0000     | 0.0000        | 0.0000        | -0.1313   |
| 4171 | 8032789 | STAP2        | 0.1313     | 0.0000        | 0.0000        | 0.0000    |
| 4172 | 7993946 | EEF2K        | 0.0000     | -0.0114       | 0.0000        | 0.1312    |
| 4173 | 8138189 | RPA3         | 0.0000     | 0.1312        | 0.0000        | 0.0000    |
| 4174 | 8009533 | COG1         | 0.0884     | 0.0000        | -0.1312       | 0.0000    |
| 4175 | 7945262 | JAM3         | 0.0000     | -0.1312       | 0.0000        | 0.0000    |
| 4176 | 8065537 | CTD-2514C3.1 | -0.1312    | 0.0000        | 0.0000        | 0.0553    |
| 4177 | 8065372 | NAPB         | 0.0000     | 0.0000        | 0.0000        | -0.1311   |
| 4178 | 8174207 | NXF3         | -0.0986    | 0.0000        | 0.1311        | 0.0000    |
| 4179 | 7896247 | ---          | 0.0000     | -0.0357       | 0.0000        | 0.1310    |
| 4180 | 8040908 | SNX17        | 0.0000     | 0.0000        | 0.0000        | -0.1310   |
| 4181 | 7972912 | DCUN1D2      | 0.0000     | 0.0000        | -0.1310       | 0.0000    |
| 4182 | 7894812 | ---          | 0.0000     | 0.0000        | 0.0000        | 0.1310    |
| 4183 | 7893012 | ---          | -0.0471    | 0.0000        | 0.0000        | 0.1309    |
| 4184 | 7893166 | ---          | 0.0000     | 0.0000        | 0.0000        | 0.1308    |
| 4185 | 7904073 | FAM19A3      | 0.0000     | 0.1308        | -0.0019       | 0.0000    |
| 4186 | 7893436 | ---          | 0.0000     | 0.0000        | 0.0000        | 0.1307    |
| 4187 | 7894744 | ---          | -0.1047    | 0.1307        | 0.0000        | 0.0000    |
| 4188 | 7895046 | ---          | 0.0000     | -0.1307       | 0.0000        | 0.0000    |
| 4189 | 7901993 | CACHD1       | -0.0523    | -0.1274       | 0.1307        | 0.0472    |
| 4190 | 7978838 | C14orf104    | 0.0000     | 0.0000        | 0.0000        | -0.1306   |
| 4191 | 7927082 | HSD17B7P2    | 0.0000     | 0.0000        | -0.1305       | 0.0347    |
| 4192 | 7924172 | NSL1         | 0.0000     | 0.0000        | 0.0000        | -0.1305   |
| 4193 | 8072979 | POLR2F       | 0.0000     | 0.1305        | 0.0000        | 0.0000    |
| 4194 | 8020653 | CABYR        | 0.1305     | 0.0000        | -0.1005       | 0.0000    |
| 4195 | 8141728 | RABL5        | 0.0105     | 0.0592        | 0.0000        | -0.1304   |
| 4196 | 8035465 | ISYNA1       | -0.1304    | 0.0000        | 0.0000        | 0.0392    |
| 4197 | 7993298 | ERCC4        | 0.0000     | 0.0000        | 0.0000        | -0.1304   |
| 4198 | 7904569 | ---          | 0.0000     | -0.1304       | 0.0000        | 0.0000    |
| 4199 | 7895161 | ---          | 0.0000     | 0.0000        | 0.0000        | -0.1303   |
| 4200 | 7947590 | SYT13        | 0.0000     | 0.0000        | -0.1247       | 0.1303    |
| 4201 | 7963770 | GPR84        | -0.0098    | 0.0000        | 0.1303        | 0.0000    |
| 4202 | 8169806 | ---          | 0.0472     | 0.0949        | 0.0000        | -0.1302   |
| 4203 | 8074688 | THAP7        | 0.0000     | 0.1098        | 0.0000        | -0.1302   |
| 4204 | 7894580 | ---          | 0.0670     | 0.0000        | 0.0000        | -0.1302   |
| 4205 | 7894579 | ---          | -0.1301    | 0.0000        | 0.0000        | 0.0000    |
| 4206 | 7942650 | C11orf30     | 0.0000     | -0.1301       | 0.0000        | 0.0000    |
| 4207 | 8137709 | ZFAND2A      | 0.0000     | 0.0000        | 0.0000        | -0.1301   |
| 4208 | 7985983 | NGRN         | 0.0000     | 0.0405        | 0.0000        | -0.1300   |
| 4209 | 8128695 | ---          | 0.0000     | 0.1300        | 0.0000        | 0.0000    |
| 4210 | 8124008 | CCDC90A      | 0.0366     | 0.0000        | 0.0000        | -0.1299   |
| 4211 | 8171802 | ACOT9        | 0.0000     | -0.0534       | 0.1299        | 0.0000    |
| 4212 | 7912496 | MTHFR        | -0.1299    | 0.0000        | 0.0000        | 0.0000    |
| 4213 | 8001552 | CIAPIN1      | 0.0000     | 0.0040        | 0.0000        | -0.1299   |
| 4214 | 7925048 | EGLN1        | 0.0000     | 0.0000        | -0.1298       | 0.0346    |

| #    | ID      | Name       | SDHB.score | SDHD-AT.score | SDHD-HN.score | VHL.score |
|------|---------|------------|------------|---------------|---------------|-----------|
| 4215 | 8174361 | TSC22D3    | -0.1298    | 0.0000        | 0.0000        | 0.0000    |
| 4216 | 8035271 | ABHD8      | 0.0000     | 0.0733        | 0.0000        | -0.1298   |
| 4217 | 8155359 | CNTNAP3    | 0.0000     | -0.1298       | 0.0000        | 0.1019    |
| 4218 | 8085300 | SEC13      | 0.0000     | 0.0879        | 0.0000        | -0.1297   |
| 4219 | 7943162 | C11orf54   | 0.0000     | -0.1297       | 0.0000        | 0.0000    |
| 4220 | 8047952 | UNC80      | 0.0347     | 0.0000        | -0.1297       | 0.0000    |
| 4221 | 7893504 | ---        | 0.1297     | 0.0000        | -0.0715       | -0.0635   |
| 4222 | 8106252 | HEXB       | 0.0000     | 0.0000        | 0.0000        | -0.1296   |
| 4223 | 7896695 | ---        | 0.0000     | 0.0000        | 0.1296        | -0.1206   |
| 4224 | 7892564 | ---        | 0.0000     | 0.1296        | 0.0000        | -0.0698   |
| 4225 | 8073752 | FAM118A    | -0.1296    | 0.0000        | 0.0000        | 0.0000    |
| 4226 | 8142886 | UBE2H      | 0.1296     | 0.0000        | -0.0173       | 0.0000    |
| 4227 | 8116297 | HNRNPH1    | 0.0000     | -0.1295       | 0.0000        | 0.0557    |
| 4228 | 8171148 | ARSD       | 0.0000     | 0.0000        | 0.0000        | 0.1295    |
| 4229 | 8026315 | PKN1       | 0.0326     | 0.0000        | 0.0000        | -0.1295   |
| 4230 | 8007730 | ACBD4      | 0.0000     | 0.0000        | 0.0000        | -0.1294   |
| 4231 | 8174047 | TIMM8A     | 0.0000     | 0.0000        | 0.0000        | -0.1294   |
| 4232 | 8065889 | UQCC       | 0.0000     | 0.1293        | 0.0000        | 0.0000    |
| 4233 | 8028872 | LTPB4      | -0.0522    | 0.0000        | 0.1293        | 0.0000    |
| 4234 | 8106278 | ---        | 0.0116     | 0.0000        | 0.0000        | -0.1292   |
| 4235 | 8058258 | ALS2CR4    | 0.0000     | 0.0429        | 0.0000        | -0.1290   |
| 4236 | 8034448 | C19orf56   | 0.0000     | 0.1290        | 0.0000        | 0.0000    |
| 4237 | 7924636 | TMEM63A    | -0.1029    | -0.0135       | 0.1290        | 0.0658    |
| 4238 | 8042468 | ANXA4      | 0.0000     | 0.0000        | 0.1289        | -0.0293   |
| 4239 | 8098620 | FAM149A    | 0.0000     | 0.0000        | 0.0000        | -0.1289   |
| 4240 | 7952641 | RICS       | 0.0764     | 0.0000        | -0.1289       | 0.0000    |
| 4241 | 7915861 | MOBK12C    | -0.1289    | 0.0000        | 0.0000        | 0.1219    |
| 4242 | 7898957 | RCAN3      | 0.0000     | 0.1288        | 0.0000        | -0.0215   |
| 4243 | 7894968 | ---        | 0.0000     | 0.1288        | 0.0000        | 0.0000    |
| 4244 | 7983704 | GLDN       | -0.1149    | 0.0000        | 0.0000        | 0.1288    |
| 4245 | 7968892 | SERP2      | 0.0000     | 0.1287        | 0.0000        | 0.0000    |
| 4246 | 7906576 | NCSTN      | 0.0000     | 0.0759        | -0.1286       | 0.0000    |
| 4247 | 8101893 | ADH1C      | -0.1285    | 0.0000        | 0.0439        | 0.0378    |
| 4248 | 8090030 | HSPBAP1    | -0.0049    | 0.0000        | 0.1285        | 0.0000    |
| 4249 | 7926728 | MYO3A      | 0.0000     | 0.0000        | -0.1284       | 0.0000    |
| 4250 | 7914218 | TAF12      | -0.1283    | 0.0000        | 0.0000        | 0.0000    |
| 4251 | 7894987 | ---        | -0.1283    | 0.0000        | 0.0000        | 0.0000    |
| 4252 | 8072170 | KREMEN1    | 0.0325     | 0.0000        | 0.0000        | -0.1283   |
| 4253 | 8138108 | KDEL2      | 0.0000     | 0.1214        | 0.0000        | -0.1283   |
| 4254 | 8034454 | DHPS       | 0.0324     | 0.0541        | 0.0000        | -0.1282   |
| 4255 | 7957467 | C12orf29   | 0.0000     | 0.0000        | -0.1282       | 0.0000    |
| 4256 | 8091629 | C3orf33    | 0.0000     | 0.0000        | 0.0000        | -0.1281   |
| 4257 | 7936596 | C10orf46   | 0.1281     | 0.0000        | 0.0000        | -0.0637   |
| 4258 | 8019842 | TYMS       | 0.1281     | 0.0000        | -0.0134       | 0.0000    |
| 4259 | 7979387 | SLC35F4    | 0.1280     | 0.0000        | 0.0000        | -0.0191   |
| 4260 | 7903239 | AGL        | -0.1280    | 0.0000        | 0.0000        | 0.0287    |
| 4261 | 7970111 | ARHGEF7    | -0.0173    | 0.0000        | 0.0000        | 0.1280    |
| 4262 | 8164304 | ST6GALNAC6 | 0.0000     | 0.0000        | 0.1279        | 0.0000    |
| 4263 | 8143132 | LUZP6      | 0.0000     | 0.0000        | 0.1278        | 0.0000    |
| 4264 | 8157905 | FAM125B    | 0.0000     | 0.0000        | 0.0000        | 0.1278    |
| 4265 | 8112803 | LHFPL2     | 0.0000     | -0.0150       | 0.1278        | 0.0000    |
| 4266 | 8115164 | ---        | 0.0299     | 0.0000        | 0.0000        | -0.1277   |
| 4267 | 7979400 | C14orf37   | 0.0217     | 0.0000        | 0.0000        | -0.1276   |
| 4268 | 8098549 | STOX2      | 0.0000     | 0.0000        | -0.1276       | 0.0000    |
| 4269 | 8098379 | WDR17      | 0.0112     | 0.0000        | -0.1274       | 0.0000    |
| 4270 | 7949615 | B3GNT1     | 0.1273     | 0.0000        | -0.0240       | -0.1165   |
| 4271 | 8136790 | ---        | 0.0000     | 0.0000        | -0.1272       | 0.0000    |
| 4272 | 7892579 | ---        | 0.0000     | 0.1033        | 0.0000        | -0.1272   |
| 4273 | 8035249 | NR2F6      | 0.0534     | 0.0000        | 0.0000        | -0.1272   |
| 4274 | 8146625 | NKAIN3     | -0.1090    | 0.0000        | 0.0000        | 0.1271    |
| 4275 | 8021181 | SCARNA17   | 0.0160     | 0.0000        | 0.0000        | -0.1271   |
| 4276 | 7893451 | ---        | 0.0487     | 0.0000        | 0.0000        | -0.1271   |

| #    | ID      | Name         | SDHB.score | SDHD-AT.score | SDHD-HN.score | VHL.score |
|------|---------|--------------|------------|---------------|---------------|-----------|
| 4277 | 7902495 | NEXN         | -0.1271    | 0.0000        | 0.0370        | 0.0157    |
| 4278 | 8174199 | ---          | 0.0000     | -0.1270       | 0.0000        | 0.0398    |
| 4279 | 8004699 | CHD3         | 0.0943     | -0.1270       | 0.0000        | 0.0000    |
| 4280 | 8160168 | FREM1        | 0.0000     | 0.0000        | 0.0000        | 0.1269    |
| 4281 | 8009639 | GPRC5C       | 0.0000     | -0.1268       | 0.0000        | 0.0000    |
| 4282 | 8135235 | PMPCB        | 0.0000     | 0.0000        | -0.1268       | 0.0000    |
| 4283 | 7979398 | ---          | 0.1267     | 0.0000        | 0.0000        | -0.0076   |
| 4284 | 7952408 | SIAE         | 0.1267     | -0.1091       | 0.0000        | 0.0000    |
| 4285 | 7913787 | C1orf201     | -0.0206    | 0.1266        | 0.0000        | 0.0000    |
| 4286 | 7957242 | LOC552889    | 0.0000     | 0.1266        | 0.0000        | 0.0000    |
| 4287 | 8180339 | ---          | 0.0000     | 0.0000        | 0.1266        | 0.0000    |
| 4288 | 7942879 | TMEM126B     | 0.0988     | 0.0000        | 0.0000        | -0.1265   |
| 4289 | 7934916 | CH25H        | -0.1264    | 0.0000        | 0.0000        | 0.0324    |
| 4290 | 7962689 | VDR          | 0.0000     | 0.0000        | 0.0000        | 0.1263    |
| 4291 | 8099841 | TLR6         | -0.0901    | 0.0000        | 0.1263        | 0.0000    |
| 4292 | 7950524 | MAP6         | 0.0000     | 0.0000        | -0.1262       | 0.0000    |
| 4293 | 7913727 | MYOM3        | 0.0000     | 0.0000        | 0.1260        | 0.0000    |
| 4294 | 8049969 | SH3YL1       | 0.0000     | 0.0000        | -0.1260       | 0.0515    |
| 4295 | 8173732 | TAF9B        | 0.0579     | 0.0000        | 0.0000        | -0.1260   |
| 4296 | 7998063 | TUBB3        | 0.0090     | 0.0000        | 0.0000        | -0.1260   |
| 4297 | 8054888 | CLASP1       | 0.0000     | 0.0000        | -0.1258       | 0.0732    |
| 4298 | 7978059 | ZFHX2        | 0.0000     | 0.0000        | -0.1258       | 0.0538    |
| 4299 | 7962659 | HDAC7        | -0.0783    | -0.0914       | 0.0345        | 0.1258    |
| 4300 | 7952011 | SCN2B        | 0.1258     | 0.0000        | 0.0000        | 0.0000    |
| 4301 | 8010901 | DOC2B        | 0.0900     | 0.0000        | 0.0000        | -0.1258   |
| 4302 | 7979694 | ---          | -0.1257    | 0.0000        | 0.0000        | 0.0000    |
| 4303 | 8062821 | ---          | 0.0000     | 0.1257        | 0.0000        | 0.0000    |
| 4304 | 7928882 | C10orf116    | -0.1203    | 0.0000        | 0.1256        | 0.0000    |
| 4305 | 8110882 | FLJ33360     | 0.0000     | 0.0000        | 0.0000        | 0.1256    |
| 4306 | 7934050 | SLC25A16     | 0.0923     | 0.0000        | 0.0000        | -0.1255   |
| 4307 | 8076355 | PMM1         | 0.0000     | 0.1255        | 0.0000        | 0.0000    |
| 4308 | 7948900 | SNORD30      | 0.1255     | 0.0000        | 0.0000        | 0.0000    |
| 4309 | 7944656 | SC5DL        | 0.1254     | 0.0000        | 0.0000        | -0.0064   |
| 4310 | 7980338 | C14orf4      | 0.1212     | 0.0000        | 0.0000        | -0.1254   |
| 4311 | 8169949 | RP6-213H19.1 | 0.0404     | 0.0949        | 0.0000        | -0.1254   |
| 4312 | 8133074 | INTS4L1      | 0.1253     | 0.0000        | 0.0000        | 0.0000    |
| 4313 | 7907439 | PRDX6        | 0.0000     | 0.0000        | 0.0000        | -0.1253   |
| 4314 | 8158269 | ODF2         | 0.0000     | 0.0000        | 0.0000        | 0.1253    |
| 4315 | 8123728 | LYRM4        | 0.0000     | 0.0000        | 0.0000        | -0.1253   |
| 4316 | 7972946 | RASA3        | -0.1252    | 0.0000        | 0.0496        | 0.0936    |
| 4317 | 8051298 | GALNT14      | 0.0171     | 0.0000        | -0.1252       | 0.0000    |
| 4318 | 8097116 | ---          | -0.0165    | 0.0000        | 0.0000        | 0.1252    |
| 4319 | 7938263 | EIF3F        | 0.0000     | 0.0000        | 0.0000        | -0.1251   |
| 4320 | 7980955 | NDUFB1       | 0.0000     | 0.1250        | 0.0000        | -0.0762   |
| 4321 | 8007931 | ITGB3        | 0.0000     | -0.0700       | 0.1250        | 0.0000    |
| 4322 | 7916185 | ZCCHC11      | -0.1056    | 0.0000        | 0.0000        | 0.1249    |
| 4323 | 7951408 | CARD16       | -0.1249    | 0.0000        | 0.0242        | 0.0076    |
| 4324 | 7904158 | OLFML3       | -0.0397    | 0.0000        | 0.1249        | 0.0000    |
| 4325 | 8002020 | TPPP3        | 0.0000     | 0.0000        | 0.1248        | 0.0000    |
| 4326 | 8114805 | FGF1         | 0.0000     | 0.0000        | 0.0000        | 0.1248    |
| 4327 | 8180379 | ---          | 0.0000     | 0.0000        | -0.1247       | 0.0000    |
| 4328 | 8143825 | KCNH2        | 0.1078     | 0.0000        | -0.1246       | 0.0000    |
| 4329 | 8171229 | PNPLA4       | 0.0258     | 0.1246        | -0.0271       | -0.0730   |
| 4330 | 8078033 | C3orf19      | 0.0000     | 0.1246        | 0.0000        | -0.0781   |
| 4331 | 7897824 | MFN2         | -0.1246    | 0.0000        | 0.0000        | 0.0000    |
| 4332 | 7915008 | SNIP1        | -0.1246    | 0.0000        | 0.0000        | 0.0437    |
| 4333 | 7997525 | MLYCD        | 0.0000     | 0.0000        | -0.0610       | 0.1245    |
| 4334 | 8094574 | TBC1D1       | 0.0000     | 0.0000        | 0.1243        | 0.0000    |
| 4335 | 8055445 | DARS         | 0.0000     | 0.0000        | 0.0000        | 0.1243    |
| 4336 | 8050846 | DTNB         | 0.0000     | 0.0000        | 0.0000        | -0.1242   |
| 4337 | 8154727 | LOC138412    | 0.0000     | 0.1242        | 0.0000        | 0.0000    |
| 4338 | 8113073 | ARRDC3       | -0.0477    | 0.0000        | 0.0000        | 0.1242    |

| #    | ID      | Name      | SDHB.score | SDHD-AT.score | SDHD-HN.score | VHL.score |
|------|---------|-----------|------------|---------------|---------------|-----------|
| 4339 | 7896290 | ---       | 0.0000     | 0.0000        | 0.0000        | 0.1241    |
| 4340 | 7915245 | HPCAL4    | 0.0000     | 0.0000        | -0.1221       | 0.1241    |
| 4341 | 8106122 | TNPO1     | 0.0285     | 0.0817        | -0.1240       | 0.0000    |
| 4342 | 7912898 | ATP13A2   | 0.0000     | 0.1240        | 0.0000        | 0.0000    |
| 4343 | 8039212 | LILRB2    | -0.0161    | 0.0000        | 0.1239        | 0.0000    |
| 4344 | 7950644 | NDUFC2    | 0.0634     | 0.0000        | 0.0000        | -0.1239   |
| 4345 | 7952451 | UNQ565    | 0.0178     | -0.1239       | 0.0000        | 0.0000    |
| 4346 | 8030881 | PPP2R1A   | 0.0000     | 0.1239        | -0.0331       | 0.0000    |
| 4347 | 7971937 | KLHL1     | 0.0000     | 0.0000        | 0.1239        | 0.0000    |
| 4348 | 7921487 | TAGLN2    | -0.1239    | 0.0000        | 0.0000        | 0.0884    |
| 4349 | 8143710 | ---       | 0.0617     | -0.1238       | 0.0000        | 0.0000    |
| 4350 | 8144315 | ARHGEF10  | 0.0000     | 0.0000        | 0.0000        | 0.1238    |
| 4351 | 8115783 | STK10     | -0.0385    | 0.0000        | 0.1238        | 0.0000    |
| 4352 | 8103601 | DDX60L    | 0.0000     | -0.1238       | 0.0000        | 0.0774    |
| 4353 | 8130988 | C6orf35   | 0.0000     | 0.1237        | 0.0000        | 0.0000    |
| 4354 | 7893678 | ---       | 0.0000     | 0.0642        | 0.0000        | -0.1235   |
| 4355 | 7978538 | C14orf128 | 0.1235     | 0.0000        | 0.0000        | 0.0000    |
| 4356 | 7894331 | ---       | 0.0000     | 0.0000        | 0.0000        | -0.1232   |
| 4357 | 7926059 | ---       | -0.0379    | 0.0000        | 0.0000        | 0.1232    |
| 4358 | 8004957 | DNAH9     | 0.0000     | 0.0000        | 0.0000        | 0.1231    |
| 4359 | 8130142 | LRP11     | 0.0252     | 0.0000        | 0.0000        | -0.1231   |
| 4360 | 8131871 | CCDC126   | 0.0000     | 0.1231        | 0.0000        | -0.0577   |
| 4361 | 7986132 | MAN2A2    | 0.0296     | 0.0000        | -0.1231       | 0.0000    |
| 4362 | 8118734 | ITPR3     | -0.1143    | 0.0000        | 0.1230        | 0.0377    |
| 4363 | 7899289 | WDTC1     | -0.1230    | 0.0858        | 0.0000        | 0.0000    |
| 4364 | 7986250 | CHD2      | 0.0000     | 0.0000        | 0.0000        | 0.1229    |
| 4365 | 7987439 | GPR176    | 0.0000     | -0.1228       | 0.0000        | 0.0634    |
| 4366 | 7896474 | ---       | 0.1227     | -0.0667       | -0.0217       | 0.0000    |
| 4367 | 8095376 | MT2A      | -0.0705    | 0.0000        | 0.0000        | 0.1227    |
| 4368 | 8042040 | EML6      | 0.1227     | 0.0000        | 0.0000        | 0.0000    |
| 4369 | 7904000 | DDX20     | -0.1226    | 0.0000        | 0.0000        | 0.0000    |
| 4370 | 8020321 | ---       | 0.0000     | -0.0118       | 0.0000        | 0.1226    |
| 4371 | 7903079 | DR1       | -0.1226    | 0.0298        | 0.0653        | 0.0000    |
| 4372 | 7901513 | SCP2      | -0.1226    | 0.0000        | 0.0909        | 0.0000    |
| 4373 | 7899939 | GJA4      | -0.1225    | 0.0000        | 0.0038        | 0.0924    |
| 4374 | 7916130 | KTI12     | 0.0000     | 0.1225        | 0.0000        | 0.0000    |
| 4375 | 8167099 | INE1      | 0.0000     | 0.0000        | 0.0000        | 0.1225    |
| 4376 | 8129458 | ARHGAP18  | -0.1224    | 0.0000        | 0.0601        | 0.0000    |
| 4377 | 7895946 | ---       | 0.0000     | -0.0956       | 0.0000        | 0.1224    |
| 4378 | 8001197 | NETO2     | 0.1223     | 0.0000        | 0.0000        | 0.0000    |
| 4379 | 7909400 | CD46      | 0.0000     | 0.0000        | -0.1223       | 0.0000    |
| 4380 | 8068857 | NDUFV3    | 0.0646     | 0.0000        | 0.0000        | -0.1222   |
| 4381 | 8177851 | C6orf136  | 0.0164     | 0.0067        | 0.0000        | -0.1222   |
| 4382 | 7943853 | SDHD      | 0.0524     | -0.1221       | 0.0000        | 0.0000    |
| 4383 | 8129837 | IL20RA    | 0.0000     | 0.0000        | -0.1221       | 0.0007    |
| 4384 | 7942232 | NADSYN1   | 0.0000     | -0.1221       | 0.0000        | 0.0000    |
| 4385 | 7926127 | CUGBP2    | -0.0960    | 0.0000        | 0.1221        | 0.0000    |
| 4386 | 7954063 | RPL13AP20 | 0.0000     | 0.1220        | 0.0000        | 0.0000    |
| 4387 | 8103646 | NEK1      | 0.0000     | 0.0118        | 0.0000        | -0.1220   |
| 4388 | 7942932 | C11orf73  | 0.0237     | 0.0000        | 0.0000        | -0.1219   |
| 4389 | 7942204 | CTTN      | 0.0000     | -0.1219       | 0.0000        | 0.0000    |
| 4390 | 7915982 | BEND5     | -0.1219    | 0.0306        | 0.0000        | 0.0060    |
| 4391 | 8060895 | RNU105B   | 0.0000     | -0.0013       | 0.1219        | 0.0000    |
| 4392 | 7991186 | NTRK3     | 0.1023     | 0.0000        | -0.1218       | 0.0000    |
| 4393 | 8066431 | ADA       | 0.0000     | -0.1218       | 0.0748        | 0.0000    |
| 4394 | 7892766 | ---       | 0.0000     | 0.0000        | 0.0000        | -0.1218   |
| 4395 | 7901054 | PLK3      | -0.1204    | 0.0000        | 0.1217        | 0.0380    |
| 4396 | 7957536 | NUDT4     | 0.0000     | 0.0000        | 0.0000        | 0.1217    |
| 4397 | 7950271 | FAM168A   | 0.1217     | 0.0000        | 0.0000        | -0.0422   |
| 4398 | 8027932 | COX6B1    | 0.0000     | 0.1217        | 0.0000        | -0.1088   |
| 4399 | 7892574 | ---       | 0.0000     | 0.0000        | 0.0000        | -0.1214   |
| 4400 | 8083094 | RASA2     | 0.0000     | 0.0000        | 0.1214        | 0.0000    |

| #    | ID      | Name       | SDHB.score | SDHD-AT.score | SDHD-HN.score | VHL.score |
|------|---------|------------|------------|---------------|---------------|-----------|
| 4401 | 7932433 | NSUN6      | 0.0000     | 0.0000        | 0.0000        | 0.1214    |
| 4402 | 8083223 | C3orf58    | -0.0955    | 0.0000        | 0.1212        | 0.0364    |
| 4403 | 8000001 | ---        | 0.0000     | 0.1212        | 0.0000        | 0.0000    |
| 4404 | 8025506 | PIN1       | 0.0000     | 0.1212        | 0.0000        | -0.0667   |
| 4405 | 8180386 | ---        | -0.0504    | 0.0000        | 0.1212        | 0.0000    |
| 4406 | 8014391 | CCL3L1     | -0.1085    | 0.0000        | 0.1212        | 0.0000    |
| 4407 | 7892530 | ---        | 0.0000     | 0.1211        | 0.0000        | 0.0000    |
| 4408 | 8104490 | ---        | 0.0000     | 0.0000        | 0.0000        | 0.1211    |
| 4409 | 8088397 | ACOX2      | 0.0000     | 0.0757        | 0.0000        | -0.1210   |
| 4410 | 8032996 | C19orf70   | 0.0000     | 0.1210        | 0.0000        | -0.1100   |
| 4411 | 7941707 | RBM14      | 0.0000     | -0.1208       | 0.0000        | 0.0000    |
| 4412 | 8133654 | SPDYE5     | 0.0000     | 0.0000        | -0.1208       | 0.0000    |
| 4413 | 7931500 | GPR123     | 0.0000     | 0.0000        | -0.1020       | 0.1208    |
| 4414 | 7944463 | NLRX1      | 0.1208     | 0.0000        | 0.0000        | 0.0000    |
| 4415 | 8028380 | PSMD8      | 0.0000     | 0.1207        | 0.0000        | -0.1103   |
| 4416 | 7930919 | ---        | 0.0000     | 0.1207        | 0.0000        | 0.0000    |
| 4417 | 7909390 | CR1L       | -0.0612    | 0.0000        | 0.1207        | 0.0000    |
| 4418 | 7895273 | ---        | 0.0000     | 0.0486        | 0.0000        | -0.1206   |
| 4419 | 7916727 | ITGB3BP    | -0.1205    | 0.0000        | 0.0000        | 0.0674    |
| 4420 | 7896430 | ---        | 0.1205     | 0.0000        | -0.1079       | 0.0000    |
| 4421 | 8101723 | NAP1L5     | -0.1126    | 0.0000        | 0.0000        | 0.1205    |
| 4422 | 7895232 | ---        | 0.0000     | -0.1204       | 0.0000        | 0.0121    |
| 4423 | 8001082 | SLC6A8     | 0.0000     | 0.0000        | 0.0000        | 0.1203    |
| 4424 | 8061186 | SEC23B     | 0.1203     | 0.0000        | -0.0315       | 0.0000    |
| 4425 | 7955450 | LETMD1     | 0.0743     | 0.1202        | -0.1126       | -0.0855   |
| 4426 | 7894501 | ---        | -0.1202    | 0.0881        | 0.0000        | 0.0000    |
| 4427 | 7953835 | KLRG1      | -0.0452    | 0.0000        | 0.1202        | 0.0000    |
| 4428 | 7898585 | NBL1       | 0.0000     | 0.0000        | 0.1202        | 0.0000    |
| 4429 | 8050007 | PXDN       | -0.0395    | 0.0000        | 0.1200        | 0.0000    |
| 4430 | 8084016 | PIK3CA     | -0.0107    | 0.0000        | 0.1200        | 0.0000    |
| 4431 | 8161654 | TRPM3      | 0.1200     | 0.0000        | -0.0176       | 0.0000    |
| 4432 | 8088770 | ---        | -0.1200    | 0.0000        | 0.0000        | 0.0000    |
| 4433 | 7981249 | SETD3      | 0.1199     | 0.0000        | 0.0000        | -0.0512   |
| 4434 | 7987572 | ---        | 0.0000     | 0.1198        | 0.0000        | -0.0226   |
| 4435 | 7957338 | SYT1       | 0.0161     | 0.0158        | 0.0000        | -0.1198   |
| 4436 | 8042917 | DOK1       | 0.0000     | 0.0000        | 0.1198        | 0.0000    |
| 4437 | 8090934 | ---        | -0.1197    | 0.0000        | 0.0982        | 0.0000    |
| 4438 | 7893967 | ---        | 0.0000     | -0.1197       | 0.0000        | 0.0000    |
| 4439 | 7896690 | ---        | 0.0000     | 0.0000        | 0.1197        | 0.0000    |
| 4440 | 8150439 | ANK1       | 0.1049     | 0.0000        | 0.0000        | -0.1197   |
| 4441 | 8076497 | A4GALT     | 0.0000     | -0.0039       | 0.1197        | 0.0000    |
| 4442 | 8136115 | FAM40B     | 0.1146     | 0.0000        | 0.0000        | -0.1196   |
| 4443 | 7981955 | SNORD116-4 | 0.0000     | 0.1196        | 0.0000        | 0.0000    |
| 4444 | 7995926 | NLRC5      | 0.0000     | -0.1196       | 0.0000        | 0.0000    |
| 4445 | 8047377 | ---        | 0.0158     | 0.0000        | 0.0000        | -0.1196   |
| 4446 | 8170921 | PLXNA3     | 0.0000     | 0.0000        | -0.1196       | 0.0000    |
| 4447 | 7968274 | PAN3       | -0.0769    | 0.0000        | 0.0000        | 0.1196    |
| 4448 | 8042038 | RPL23AP32  | -0.0083    | -0.0440       | 0.0000        | 0.1195    |
| 4449 | 8155460 | CNTNAP3    | 0.0000     | -0.1195       | 0.0000        | 0.0128    |
| 4450 | 8033554 | CD320      | 0.0000     | 0.1194        | 0.0000        | 0.0000    |
| 4451 | 8018708 | UBE2O      | 0.0000     | 0.0000        | -0.1194       | 0.0000    |
| 4452 | 7922130 | DPT        | -0.0876    | 0.0000        | 0.1194        | 0.0374    |
| 4453 | 7920027 | TNRC4      | 0.0000     | 0.0000        | -0.1194       | 0.0000    |
| 4454 | 7896534 | ---        | 0.0000     | 0.0000        | -0.1193       | 0.0000    |
| 4455 | 8180405 | ---        | -0.0596    | 0.0000        | 0.1193        | 0.0000    |
| 4456 | 7941243 | DPF2       | 0.1193     | 0.0000        | 0.0000        | 0.0000    |
| 4457 | 7902848 | ---        | -0.0442    | 0.0000        | 0.0000        | 0.1193    |
| 4458 | 7925436 | ---        | 0.0000     | 0.0207        | 0.0000        | -0.1192   |
| 4459 | 7895955 | ---        | 0.0000     | 0.0000        | 0.0000        | 0.1192    |
| 4460 | 7910200 | SNAP47     | 0.1191     | 0.0000        | 0.0000        | -0.0401   |
| 4461 | 7895932 | ---        | -0.1191    | 0.0000        | 0.0000        | 0.0221    |
| 4462 | 7929831 | HIF1AN     | 0.0082     | 0.0312        | 0.0000        | -0.1190   |



| #    | ID      | Name      | SDHB.score | SDHD-AT.score | SDHD-HN.score | VHL.score |
|------|---------|-----------|------------|---------------|---------------|-----------|
| 4463 | 8000501 | PDXDC2    | 0.0000     | 0.0000        | 0.0000        | 0.1189    |
| 4464 | 8043718 | COX5B     | 0.0000     | 0.1189        | 0.0000        | -0.0256   |
| 4465 | 8166382 | MBTPS2    | 0.0848     | 0.0000        | 0.0000        | -0.1189   |
| 4466 | 7994675 | ASPHD1    | 0.0442     | 0.0000        | 0.0000        | -0.1188   |
| 4467 | 8117890 | HLA-E     | 0.0000     | 0.0000        | 0.1187        | 0.0000    |
| 4468 | 7935228 | ---       | 0.0000     | -0.1187       | 0.0000        | 0.0997    |
| 4469 | 7896210 | ---       | 0.1187     | -0.1137       | 0.0000        | 0.0000    |
| 4470 | 7940486 | SDHAF2    | 0.1186     | 0.0000        | 0.0000        | 0.0000    |
| 4471 | 8025103 | EMR1      | 0.0000     | 0.0000        | 0.1186        | 0.0000    |
| 4472 | 8092621 | CRYGS     | -0.1186    | 0.0000        | 0.0073        | 0.0487    |
| 4473 | 8085571 | METTL6    | 0.0000     | 0.0000        | 0.0000        | -0.1185   |
| 4474 | 8043478 | ---       | -0.0287    | 0.0000        | 0.1184        | 0.0000    |
| 4475 | 7901549 | CPT2      | -0.1183    | 0.0000        | 0.0000        | 0.0000    |
| 4476 | 8023955 | BSG       | 0.0000     | 0.0000        | -0.1182       | 0.0000    |
| 4477 | 8134470 | TRRAP     | 0.0000     | 0.0000        | -0.1182       | 0.0000    |
| 4478 | 8124022 | DTNBP1    | 0.0000     | 0.0000        | 0.0000        | -0.1182   |
| 4479 | 8069269 | COL6A1    | 0.0000     | -0.0490       | 0.1181        | 0.0000    |
| 4480 | 8161857 | RFK       | 0.0450     | 0.0000        | 0.0000        | -0.1181   |
| 4481 | 8144213 | VIPR2     | 0.0000     | 0.0000        | -0.0932       | 0.1181    |
| 4482 | 8095395 | UGT2B7    | 0.0000     | 0.1180        | 0.0000        | 0.0000    |
| 4483 | 7896231 | ---       | 0.0003     | 0.0000        | -0.1180       | 0.0000    |
| 4484 | 7899273 | NUDC      | -0.1180    | 0.0000        | 0.0000        | 0.0095    |
| 4485 | 7896491 | ---       | 0.0480     | 0.0000        | 0.0000        | -0.1179   |
| 4486 | 8166797 | MID1IP1   | -0.1179    | 0.0000        | 0.0000        | 0.0000    |
| 4487 | 7895025 | ---       | 0.0834     | 0.0000        | -0.1179       | 0.0000    |
| 4488 | 8040463 | ---       | 0.0000     | 0.1029        | 0.0000        | -0.1178   |
| 4489 | 7985240 | TMED3     | 0.0000     | 0.1178        | 0.0000        | -0.0695   |
| 4490 | 7918517 | WDR77     | -0.1176    | 0.0000        | 0.0032        | 0.0000    |
| 4491 | 7978066 | AP1G2     | 0.0000     | 0.0000        | -0.1176       | 0.0000    |
| 4492 | 8109597 | UBLCP1    | 0.0000     | 0.0000        | 0.1176        | -0.0198   |
| 4493 | 8008064 | PNPO      | 0.0000     | 0.0748        | 0.0000        | -0.1176   |
| 4494 | 7912750 | FBXO42    | -0.1176    | 0.0000        | 0.0000        | 0.0000    |
| 4495 | 7963212 | SLC11A2   | 0.0000     | 0.1175        | 0.0000        | 0.0000    |
| 4496 | 8038942 | ZNF432    | 0.0000     | 0.0000        | 0.0000        | 0.1175    |
| 4497 | 8169073 | TMSB15B   | 0.0000     | 0.0000        | 0.0000        | -0.1175   |
| 4498 | 8019211 | NPLOC4    | 0.0510     | 0.0000        | 0.0000        | -0.1175   |
| 4499 | 8068200 | C21orf119 | 0.1174     | 0.0000        | 0.0000        | -0.1067   |
| 4500 | 8177788 | HLA-E     | 0.0000     | 0.0000        | 0.1174        | 0.0000    |
| 4501 | 8101235 | ---       | 0.0000     | 0.1173        | 0.0000        | 0.0000    |
| 4502 | 8001764 | GOT2      | 0.0600     | 0.0000        | 0.0000        | -0.1173   |
| 4503 | 8105181 | MRPS30    | 0.0000     | 0.1173        | 0.0000        | 0.0000    |
| 4504 | 7967898 | ---       | 0.0000     | 0.0000        | 0.0000        | 0.1173    |
| 4505 | 8001163 | MYLK3     | 0.0000     | 0.0000        | 0.0000        | 0.1172    |
| 4506 | 8099449 | FBXL5     | 0.0000     | 0.0000        | 0.0000        | 0.1172    |
| 4507 | 7930482 | ADRA2A    | 0.0000     | 0.0000        | 0.1172        | -0.0216   |
| 4508 | 8167125 | USP11     | 0.0934     | 0.0506        | -0.0519       | -0.1171   |
| 4509 | 7984631 | C15orf34  | 0.0903     | 0.0000        | 0.0000        | -0.1171   |
| 4510 | 7927186 | RASSF4    | -0.0243    | 0.0000        | 0.1171        | 0.0000    |
| 4511 | 7900633 | ---       | 0.0000     | 0.0000        | 0.0000        | 0.1171    |
| 4512 | 7994559 | PDXDC2    | 0.0000     | 0.0000        | 0.0000        | 0.1171    |
| 4513 | 8138067 | CYTH3     | -0.0162    | 0.0000        | 0.1171        | 0.0000    |
| 4514 | 7908597 | NR5A2     | -0.0671    | 0.0000        | 0.1171        | 0.0000    |
| 4515 | 8042416 | ARHGAP25  | -0.1171    | 0.0000        | 0.0000        | 0.0678    |
| 4516 | 7894555 | ---       | 0.0700     | -0.1170       | -0.0073       | 0.0000    |
| 4517 | 7955464 | DAZAP2    | 0.0000     | 0.0000        | 0.1170        | 0.0000    |
| 4518 | 8002421 | VAC14     | 0.0031     | 0.0000        | 0.0000        | -0.1169   |
| 4519 | 7910559 | DISC1     | -0.0979    | 0.0000        | 0.1168        | 0.0000    |
| 4520 | 7893248 | ---       | 0.0000     | 0.0000        | 0.0000        | -0.1168   |
| 4521 | 7895334 | ---       | 0.0977     | 0.0000        | -0.1168       | 0.0000    |
| 4522 | 7945875 | FAM86C    | 0.0644     | 0.0000        | 0.0000        | -0.1168   |
| 4523 | 7948679 | EEF1G     | 0.1168     | 0.0000        | 0.0000        | -0.0922   |
| 4524 | 7957072 | RAB3IP    | 0.1165     | 0.0000        | 0.0000        | -0.0996   |

| #    | ID      | Name      | SDHB.score | SDHD-AT.score | SDHD-HN.score | VHL.score |
|------|---------|-----------|------------|---------------|---------------|-----------|
| 4525 | 7994518 | SPNS1     | 0.0000     | 0.0000        | 0.0000        | -0.1165   |
| 4526 | 8132523 | UBE2D4    | 0.0000     | 0.1165        | 0.0000        | 0.0000    |
| 4527 | 8005166 | UBB       | 0.0000     | -0.1165       | 0.0000        | 0.0000    |
| 4528 | 7915919 | TAL1      | -0.0295    | 0.0000        | 0.0000        | 0.1164    |
| 4529 | 8080896 | SLC25A26  | 0.0000     | 0.0000        | 0.0000        | -0.1163   |
| 4530 | 7918533 | ADORA3    | -0.0495    | 0.0000        | 0.0000        | 0.1163    |
| 4531 | 8085412 | IQSEC1    | -0.0759    | 0.0000        | 0.1162        | 0.0000    |
| 4532 | 8132092 | INMT      | -0.1105    | 0.0000        | 0.1160        | 0.0000    |
| 4533 | 8055173 | CCDC74A   | 0.0000     | 0.0000        | -0.1159       | 0.0000    |
| 4534 | 7935462 | EXOSC1    | 0.0000     | 0.1016        | 0.0000        | -0.1158   |
| 4535 | 8153223 | PTK2      | 0.0000     | 0.0000        | 0.0000        | 0.1158    |
| 4536 | 8161288 | CNTNAP3   | 0.0000     | -0.1157       | 0.0000        | 0.0043    |
| 4537 | 8024089 | WDR18     | 0.0000     | 0.0000        | 0.0000        | -0.1156   |
| 4538 | 8054517 | LOC151009 | -0.1156    | 0.0000        | 0.0000        | 0.0000    |
| 4539 | 8006479 | LIG3      | 0.0000     | 0.0000        | -0.1156       | 0.0000    |
| 4540 | 7902789 | HS2ST1    | -0.1155    | 0.0000        | 0.0000        | 0.0000    |
| 4541 | 7915252 | BMP8B     | 0.0000     | 0.1155        | 0.0000        | 0.0000    |
| 4542 | 7948229 | SLC43A3   | -0.0811    | 0.0000        | 0.1155        | 0.0254    |
| 4543 | 8145736 | NRG1      | 0.0387     | -0.1155       | 0.0000        | 0.0000    |
| 4544 | 7964484 | B4GALNT1  | 0.0709     | 0.0000        | 0.0000        | -0.1154   |
| 4545 | 7977373 | MTA1      | 0.0000     | 0.0000        | -0.1154       | 0.0000    |
| 4546 | 8051030 | SLC5A6    | 0.1154     | 0.0000        | -0.0130       | -0.0592   |
| 4547 | 8000537 | PDXDC2    | 0.0000     | 0.0000        | 0.0000        | 0.1152    |
| 4548 | 8013633 | UNC119    | 0.0000     | 0.0000        | 0.0000        | -0.1151   |
| 4549 | 8078330 | RBMS3     | 0.0000     | 0.0000        | 0.1151        | 0.0000    |
| 4550 | 8180393 | ---       | 0.0000     | 0.1151        | 0.0000        | -0.0283   |
| 4551 | 8099982 | APBB2     | -0.1057    | -0.0074       | 0.1150        | 0.0754    |
| 4552 | 8148917 | MFSD3     | 0.0429     | 0.0000        | 0.0000        | -0.1150   |
| 4553 | 8096533 | ---       | 0.0000     | 0.1150        | 0.0000        | 0.0000    |
| 4554 | 7991057 | BTBD1     | 0.0000     | 0.0000        | 0.0000        | -0.1149   |
| 4555 | 8046488 | CDCA7     | 0.1149     | 0.0000        | 0.0000        | 0.0000    |
| 4556 | 7923875 | C1orf186  | 0.0000     | 0.0000        | 0.1149        | 0.0000    |
| 4557 | 8004842 | ARHGEF15  | 0.0000     | 0.0000        | 0.1149        | 0.0000    |
| 4558 | 7957604 | ---       | 0.0000     | 0.1147        | 0.0000        | -0.0283   |
| 4559 | 7918255 | CLCC1     | -0.1147    | 0.0000        | 0.0000        | 0.0496    |
| 4560 | 8006298 | RAB11FIP4 | 0.0801     | 0.0056        | -0.1147       | -0.0393   |
| 4561 | 7957253 | GLIPR1L2  | -0.0714    | 0.0000        | 0.0000        | 0.1147    |
| 4562 | 8165752 | IL3RA     | -0.0625    | 0.0000        | 0.1146        | 0.0000    |
| 4563 | 8074464 | UFD1L     | 0.0000     | 0.1145        | 0.0000        | 0.0000    |
| 4564 | 7895123 | ---       | 0.0000     | 0.0000        | -0.1145       | 0.0000    |
| 4565 | 7940508 | DAGLA     | 0.0635     | 0.0000        | 0.0000        | -0.1145   |
| 4566 | 7910111 | EPHX1     | -0.0785    | 0.0000        | 0.0000        | 0.1144    |
| 4567 | 7892932 | ---       | -0.1143    | 0.0000        | 0.0000        | 0.0013    |
| 4568 | 8116998 | JARID2    | 0.0000     | -0.0957       | 0.0000        | 0.1143    |
| 4569 | 8020090 | TWSG1     | 0.0000     | 0.0000        | 0.1028        | -0.1142   |
| 4570 | 7990620 | TSPAN3    | 0.0000     | 0.0000        | 0.0000        | -0.1142   |
| 4571 | 8169352 | NXT2      | 0.0000     | 0.0000        | 0.1141        | 0.0000    |
| 4572 | 8012958 | UBE2S     | 0.0000     | 0.0000        | 0.0000        | -0.1141   |
| 4573 | 8161478 | KGFLP2    | 0.0000     | 0.0000        | -0.1141       | 0.0000    |
| 4574 | 8008213 | MYST2     | 0.0000     | 0.0000        | -0.1140       | 0.0000    |
| 4575 | 8010550 | CHMP6     | 0.0000     | 0.0000        | 0.0000        | -0.1140   |
| 4576 | 8098958 | POLN      | -0.0190    | 0.0000        | 0.0000        | 0.1139    |
| 4577 | 8071489 | P2RX6     | 0.0000     | 0.1139        | -0.0324       | -0.0229   |
| 4578 | 7972003 | KLF12     | 0.0000     | 0.0000        | 0.1139        | 0.0000    |
| 4579 | 8067055 | ATP9A     | 0.0824     | 0.0000        | 0.0000        | -0.1138   |
| 4580 | 7920057 | TDRKH     | 0.0748     | 0.0189        | 0.0000        | -0.1138   |
| 4581 | 8101131 | CXCL11    | 0.0000     | 0.0000        | 0.1138        | 0.0000    |
| 4582 | 7990902 | LOC80154  | 0.1137     | 0.0000        | 0.0000        | -0.0510   |
| 4583 | 8143714 | ZNF777    | 0.1137     | 0.0000        | 0.0000        | -0.0729   |
| 4584 | 8180238 | ---       | 0.0000     | 0.0000        | 0.0000        | -0.1137   |
| 4585 | 7998784 | ABCA3     | 0.1136     | 0.0000        | -0.0957       | 0.0000    |
| 4586 | 8095736 | AREG      | -0.1099    | 0.0000        | 0.0000        | 0.1135    |

| #    | ID      | Name         | SDHB.score | SDHD-AT.score | SDHD-HN.score | VHL.score |
|------|---------|--------------|------------|---------------|---------------|-----------|
| 4587 | 7905951 | TRIM46       | 0.0000     | 0.0000        | -0.1135       | 0.0000    |
| 4588 | 8129095 | ---          | 0.0000     | 0.1135        | 0.0000        | -0.0058   |
| 4589 | 8136163 | KLHDC10      | 0.0087     | 0.0000        | -0.1133       | 0.0000    |
| 4590 | 7912166 | RERE         | -0.1133    | 0.0000        | 0.0000        | 0.0489    |
| 4591 | 7915971 | AGBL4        | -0.1027    | 0.0000        | 0.0000        | 0.1132    |
| 4592 | 8051773 | ---          | 0.0000     | 0.0659        | 0.0000        | -0.1132   |
| 4593 | 8007757 | FMNL1        | 0.0000     | 0.0000        | 0.1131        | 0.0000    |
| 4594 | 7924888 | HIST3H2A     | 0.0028     | 0.1131        | -0.0736       | -0.0072   |
| 4595 | 8083933 | ---          | 0.0000     | -0.1130       | 0.0000        | 0.0773    |
| 4596 | 7915951 | LOC100128922 | -0.1129    | 0.0000        | 0.0813        | 0.0000    |
| 4597 | 8088384 | PDHB         | 0.0000     | 0.0000        | 0.0000        | -0.1129   |
| 4598 | 8144281 | ARHGEF10     | -0.0366    | 0.0000        | 0.0000        | 0.1129    |
| 4599 | 8134454 | BRI3         | 0.0000     | 0.0000        | 0.0000        | -0.1128   |
| 4600 | 8133095 | INTS4L2      | 0.1128     | 0.0000        | 0.0000        | 0.0000    |
| 4601 | 7939329 | PDHX         | 0.0414     | 0.0000        | 0.0000        | -0.1128   |
| 4602 | 8022356 | SPIRE1       | 0.1127     | 0.0000        | 0.0000        | 0.0000    |
| 4603 | 7893933 | ---          | 0.0000     | 0.0000        | 0.0000        | -0.1126   |
| 4604 | 8036483 | YIF1B        | 0.0000     | 0.0001        | 0.0000        | -0.1125   |
| 4605 | 7964234 | ATP5B        | 0.0329     | 0.0000        | 0.0000        | -0.1125   |
| 4606 | 8151032 | GGH          | 0.0000     | 0.0603        | 0.0000        | -0.1123   |
| 4607 | 8061653 | C20orf160    | -0.0462    | 0.0000        | 0.1122        | 0.0000    |
| 4608 | 7940667 | SNORA57      | 0.0244     | 0.0000        | 0.0000        | -0.1121   |
| 4609 | 8000244 | USP31        | 0.0000     | 0.0000        | -0.1120       | 0.0000    |
| 4610 | 7964832 | ---          | 0.0000     | 0.1119        | 0.0000        | -0.0668   |
| 4611 | 7997582 | WFDC1        | 0.0000     | 0.0000        | 0.0000        | 0.1119    |
| 4612 | 7895093 | ---          | 0.0000     | -0.1119       | 0.0000        | 0.0679    |
| 4613 | 7984364 | SMAD3        | 0.0000     | -0.1118       | 0.0000        | 0.0000    |
| 4614 | 8022646 | KCTD1        | 0.0000     | 0.0000        | -0.1118       | 0.0038    |
| 4615 | 8058450 | GPR1         | 0.0627     | 0.0000        | -0.1118       | 0.0000    |
| 4616 | 8122327 | CCDC28A      | -0.1117    | 0.0000        | 0.0000        | 0.0000    |
| 4617 | 8038163 | RASIP1       | -0.1116    | 0.0000        | 0.0000        | 0.0637    |
| 4618 | 8028563 | MRPS12       | 0.0000     | 0.0000        | 0.0000        | -0.1116   |
| 4619 | 8084739 | FLJ42393     | -0.0296    | -0.0105       | 0.0000        | 0.1116    |
| 4620 | 7970507 | ---          | -0.1116    | 0.0000        | 0.0000        | 0.0920    |
| 4621 | 8124406 | HIST1H2BC    | -0.1116    | 0.0000        | 0.0000        | 0.0838    |
| 4622 | 7964987 | KCNC2        | 0.0018     | 0.0000        | 0.0000        | -0.1116   |
| 4623 | 8010405 | SLC26A11     | 0.0000     | 0.0693        | 0.0000        | -0.1116   |
| 4624 | 8100003 | ---          | -0.0697    | -0.0894       | 0.1115        | 0.0655    |
| 4625 | 8074458 | C22orf39     | 0.0112     | 0.0000        | 0.0000        | -0.1115   |
| 4626 | 8117995 | TUBB         | 0.0172     | 0.0000        | 0.0000        | -0.1115   |
| 4627 | 7894758 | ---          | 0.0788     | 0.0000        | 0.0000        | -0.1114   |
| 4628 | 8018937 | USP36        | 0.0326     | 0.0000        | -0.1114       | 0.0000    |
| 4629 | 7982597 | THBS1        | -0.0950    | 0.0000        | 0.1114        | 0.0316    |
| 4630 | 7989696 | SPG21        | 0.0000     | 0.0000        | 0.0000        | -0.1114   |
| 4631 | 7968272 | ---          | 0.0000     | 0.1113        | 0.0000        | 0.0000    |
| 4632 | 7899604 | ZCCHC17      | -0.1113    | 0.1048        | 0.0000        | 0.0000    |
| 4633 | 8087224 | SLC25A20     | 0.0000     | 0.0000        | 0.0000        | -0.1113   |
| 4634 | 8107594 | SNCAIP       | 0.0000     | 0.0000        | 0.1113        | 0.0000    |
| 4635 | 8010287 | C1QTNF1      | -0.0400    | 0.0000        | 0.1113        | 0.0000    |
| 4636 | 8124211 | GPLD1        | 0.0457     | 0.0000        | 0.0000        | -0.1112   |
| 4637 | 7935188 | SORBS1       | -0.1030    | -0.0848       | 0.1112        | 0.1097    |
| 4638 | 8147156 | WWP1         | 0.0000     | 0.0000        | 0.1111        | 0.0000    |
| 4639 | 8045309 | CCDC74A      | 0.0000     | 0.0000        | -0.1110       | 0.0000    |
| 4640 | 8093976 | TBC1D14      | 0.1110     | 0.0000        | 0.0000        | -0.0077   |
| 4641 | 8075106 | TPST2        | 0.0000     | 0.0000        | 0.1110        | 0.0000    |
| 4642 | 8156116 | C9orf103     | 0.1084     | 0.0438        | -0.0909       | -0.1109   |
| 4643 | 8051396 | NLRC4        | -0.0956    | 0.0000        | 0.1109        | 0.0029    |
| 4644 | 7941610 | PELI3        | 0.1108     | 0.0000        | 0.0000        | -0.0170   |
| 4645 | 7896635 | ---          | 0.0000     | -0.1108       | 0.0000        | 0.0000    |
| 4646 | 7893052 | ---          | 0.0475     | 0.0000        | 0.0000        | -0.1108   |
| 4647 | 8087935 | NT5DC2       | 0.0266     | 0.1108        | 0.0000        | -0.0996   |
| 4648 | 8018006 | ABCA10       | -0.1106    | 0.0000        | 0.0000        | 0.0000    |

| #    | ID      | Name         | SDHB.score | SDHD-AT.score | SDHD-HN.score | VHL.score |
|------|---------|--------------|------------|---------------|---------------|-----------|
| 4649 | 8008967 | ---          | 0.0000     | 0.1105        | 0.0000        | 0.0000    |
| 4650 | 8162584 | ---          | -0.0439    | 0.0000        | 0.0000        | 0.1104    |
| 4651 | 8045301 | SMPD4        | 0.1103     | 0.0000        | -0.0728       | 0.0000    |
| 4652 | 7973943 | INSM2        | 0.0159     | 0.0000        | -0.1103       | 0.0000    |
| 4653 | 8037537 | ERCC2        | 0.0370     | 0.0000        | 0.0000        | -0.1101   |
| 4654 | 8023415 | TCF4         | -0.1101    | 0.0000        | 0.0082        | 0.0000    |
| 4655 | 7925904 | AKR1CL2      | -0.0178    | -0.0327       | 0.0000        | 0.1100    |
| 4656 | 7920567 | PMVK         | 0.1100     | 0.0000        | 0.0000        | -0.0250   |
| 4657 | 7895839 | ---          | 0.1099     | 0.0000        | 0.0000        | 0.0000    |
| 4658 | 8133504 | GTF2I        | 0.0000     | 0.0000        | -0.1099       | 0.0000    |
| 4659 | 8081073 | C3orf38      | 0.0000     | 0.0000        | 0.0319        | -0.1098   |
| 4660 | 8142618 | RNF133       | -0.0665    | 0.0000        | 0.0000        | 0.1098    |
| 4661 | 8075910 | RAC2         | 0.0000     | 0.0000        | 0.1098        | 0.0000    |
| 4662 | 7911458 | ACAP3        | 0.0000     | 0.0000        | 0.0000        | 0.1097    |
| 4663 | 7912956 | RCC2         | -0.1097    | 0.0000        | 0.0000        | 0.0373    |
| 4664 | 8089230 | ---          | 0.0000     | 0.0171        | 0.0000        | -0.1097   |
| 4665 | 8163424 | ---          | 0.0000     | 0.0000        | 0.1097        | 0.0000    |
| 4666 | 7896069 | ---          | 0.0000     | 0.1097        | 0.0000        | 0.0000    |
| 4667 | 7952677 | NFRKB        | 0.0479     | -0.1094       | 0.0000        | 0.0000    |
| 4668 | 7951429 | KBTBD3       | 0.0164     | 0.0000        | -0.1093       | 0.0000    |
| 4669 | 8098291 | CLCN3        | 0.0372     | 0.0000        | 0.0000        | -0.1092   |
| 4670 | 8009145 | KCNH6        | 0.1014     | 0.0000        | 0.0000        | -0.1092   |
| 4671 | 8029056 | TMEM91       | 0.0000     | 0.0000        | 0.1091        | 0.0000    |
| 4672 | 7945040 | HYLS1        | 0.0741     | 0.0000        | 0.0000        | -0.1091   |
| 4673 | 7950469 | ---          | 0.0000     | 0.0000        | -0.1091       | 0.0015    |
| 4674 | 7949931 | SUV420H1     | 0.0701     | -0.1090       | 0.0000        | 0.0000    |
| 4675 | 7903803 | AHCYL1       | -0.1089    | 0.0000        | 0.0000        | 0.0703    |
| 4676 | 8079993 | CYB561D2     | 0.0000     | 0.0000        | 0.0000        | -0.1089   |
| 4677 | 7969881 | TPP2         | -0.0668    | 0.0000        | 0.0000        | 0.1089    |
| 4678 | 8132592 | OGDH         | 0.0000     | 0.0000        | 0.0000        | 0.1089    |
| 4679 | 8117054 | CAP2         | 0.0000     | 0.0000        | 0.0714        | -0.1088   |
| 4680 | 7949719 | PC           | 0.1088     | 0.0000        | 0.0000        | 0.0000    |
| 4681 | 8022986 | SYT4         | 0.1087     | 0.0000        | -0.0180       | -0.0939   |
| 4682 | 7908610 | ---          | -0.0318    | 0.0000        | 0.1087        | 0.0000    |
| 4683 | 8091458 | SERP1        | 0.0000     | 0.0000        | 0.0000        | -0.1086   |
| 4684 | 7941274 | SCYL1        | 0.1086     | 0.0000        | 0.0000        | 0.0000    |
| 4685 | 7902476 | FAM73A       | -0.1086    | 0.0236        | 0.0000        | 0.0211    |
| 4686 | 7892524 | ---          | 0.0000     | 0.0000        | 0.0000        | 0.1086    |
| 4687 | 8126681 | AARS2        | 0.0639     | 0.0000        | 0.0000        | -0.1086   |
| 4688 | 7948696 | MTA2         | 0.0387     | -0.1086       | 0.0000        | 0.0000    |
| 4689 | 8117922 | PRR3         | 0.0721     | 0.0000        | 0.0000        | -0.1084   |
| 4690 | 8029969 | SEPW1        | 0.0000     | 0.0000        | 0.1024        | -0.1084   |
| 4691 | 8003962 | PLD2         | 0.0000     | 0.0000        | 0.1083        | 0.0000    |
| 4692 | 7916018 | ---          | -0.1083    | 0.0000        | 0.0000        | 0.0000    |
| 4693 | 8119444 | FOXP4        | 0.0000     | 0.0000        | 0.0000        | 0.1082    |
| 4694 | 8158380 | PKN3         | 0.0000     | 0.0000        | 0.1082        | 0.0000    |
| 4695 | 7893619 | ---          | 0.0000     | 0.1082        | 0.0000        | 0.0000    |
| 4696 | 8018935 | ---          | -0.1016    | 0.0000        | 0.0000        | 0.1082    |
| 4697 | 8147012 | PKIA         | 0.0000     | 0.0207        | 0.0201        | -0.1081   |
| 4698 | 8176230 | RAB39B       | 0.0050     | 0.1080        | -0.0633       | -0.0143   |
| 4699 | 8085058 | ---          | 0.0000     | 0.1080        | 0.0000        | 0.0000    |
| 4700 | 7941350 | PCNXL3       | 0.1079     | 0.0000        | 0.0000        | 0.0000    |
| 4701 | 7936028 | ACTR1A       | 0.0000     | 0.0000        | 0.0000        | -0.1078   |
| 4702 | 8011275 | METT10D      | 0.1078     | -0.0915       | 0.0000        | 0.0000    |
| 4703 | 7940561 | FEN1         | 0.1078     | 0.0000        | 0.0000        | 0.0000    |
| 4704 | 7952243 | C1QTNF5      | 0.0000     | 0.0000        | 0.1077        | 0.0000    |
| 4705 | 7895213 | ---          | 0.0000     | 0.0000        | 0.1077        | 0.0000    |
| 4706 | 8117640 | ZSCAN16      | 0.0456     | 0.0000        | 0.0000        | -0.1077   |
| 4707 | 8031646 | LOC100288114 | 0.0000     | 0.0000        | -0.1075       | 0.0000    |
| 4708 | 7894536 | ---          | -0.1075    | 0.0000        | 0.0000        | 0.0000    |
| 4709 | 8146171 | IKBKB        | -0.0136    | -0.0004       | 0.0000        | 0.1075    |
| 4710 | 7944623 | TBCEL        | 0.1075     | 0.0000        | 0.0000        | 0.0000    |

| #    | ID      | Name      | SDHB.score | SDHD-AT.score | SDHD-HN.score | VHL.score |
|------|---------|-----------|------------|---------------|---------------|-----------|
| 4711 | 7946087 | OR52H1    | 0.0000     | -0.1075       | 0.0000        | 0.0000    |
| 4712 | 7908988 | SNRPE     | 0.0747     | 0.0000        | 0.0000        | -0.1075   |
| 4713 | 8111670 | GDNF      | 0.0000     | 0.0000        | 0.0000        | 0.1074    |
| 4714 | 7977749 | METTL3    | -0.0223    | 0.0000        | 0.0000        | 0.1074    |
| 4715 | 8053073 | SLC4A5    | 0.1074     | 0.0000        | 0.0000        | -0.1010   |
| 4716 | 8090098 | MYLK      | -0.0976    | -0.0417       | 0.0706        | 0.1073    |
| 4717 | 7896508 | ---       | 0.1072     | -0.0142       | -0.0001       | 0.0000    |
| 4718 | 7975787 | JDP2      | -0.1070    | 0.0000        | 0.0039        | 0.0703    |
| 4719 | 8137474 | ACTR3B    | 0.0000     | 0.0000        | -0.1070       | 0.0000    |
| 4720 | 8180229 | ---       | 0.1070     | 0.0000        | -0.0396       | 0.0000    |
| 4721 | 8139706 | SEC61G    | 0.0000     | 0.0000        | -0.1070       | 0.0322    |
| 4722 | 8091446 | PFN2      | 0.0000     | 0.0000        | 0.0000        | -0.1069   |
| 4723 | 7969559 | ---       | 0.0000     | 0.0000        | 0.1067        | 0.0000    |
| 4724 | 7893844 | ---       | 0.0000     | 0.1067        | 0.0000        | 0.0000    |
| 4725 | 8085120 | ---       | 0.0000     | 0.0000        | 0.0000        | 0.1067    |
| 4726 | 8031884 | ZNF544    | 0.0149     | 0.0000        | -0.1066       | 0.0000    |
| 4727 | 7904086 | LRIG2     | -0.0700    | 0.1066        | 0.0000        | 0.0000    |
| 4728 | 8046306 | GORASP2   | 0.0202     | 0.0000        | 0.0000        | -0.1066   |
| 4729 | 7895001 | ---       | 0.0000     | 0.1066        | 0.0000        | -0.0276   |
| 4730 | 8047839 | CREB1     | 0.0000     | 0.0000        | 0.1065        | 0.0000    |
| 4731 | 8033809 | ZNF846    | -0.1065    | 0.0000        | 0.0000        | 0.0000    |
| 4732 | 8104139 | LOC389834 | 0.0000     | 0.0000        | -0.0117       | 0.1063    |
| 4733 | 8066461 | TOMM34    | 0.0441     | 0.0000        | 0.0000        | -0.1063   |
| 4734 | 7895929 | ---       | -0.0620    | 0.0000        | 0.0000        | 0.1062    |
| 4735 | 8164535 | CRAT      | 0.1062     | 0.0000        | -0.0978       | 0.0000    |
| 4736 | 7938301 | C11orf17  | 0.0000     | 0.0000        | 0.0000        | -0.1062   |
| 4737 | 7930194 | CNNM2     | 0.1061     | 0.0000        | 0.0000        | -0.0362   |
| 4738 | 7898549 | MRTO4     | -0.1061    | 0.0000        | 0.0000        | 0.0000    |
| 4739 | 8178833 | HLA-DOB   | 0.0000     | -0.0842       | 0.1061        | 0.0000    |
| 4740 | 8004508 | SNORA67   | -0.0161    | 0.0000        | 0.0000        | 0.1060    |
| 4741 | 8058333 | ---       | 0.0000     | 0.0000        | 0.1060        | 0.0000    |
| 4742 | 8172453 | TIMM17B   | 0.0493     | 0.0000        | 0.0000        | -0.1060   |
| 4743 | 8068522 | TTC3      | 0.1059     | 0.0000        | -0.0011       | -0.0769   |
| 4744 | 7893747 | ---       | 0.1059     | 0.0000        | 0.0000        | 0.0000    |
| 4745 | 7949545 | EIF1AD    | 0.1059     | 0.0000        | 0.0000        | 0.0000    |
| 4746 | 8056734 | TLK1      | 0.1059     | 0.0000        | 0.0000        | 0.0000    |
| 4747 | 7958262 | TCP11L2   | -0.1057    | 0.0000        | 0.0856        | 0.0000    |
| 4748 | 7917338 | BCL10     | -0.1056    | 0.0000        | 0.0252        | 0.0000    |
| 4749 | 7893194 | ---       | -0.1056    | 0.0000        | 0.0000        | 0.0265    |
| 4750 | 8079896 | SEMA3F    | -0.0179    | -0.0544       | 0.1054        | 0.0000    |
| 4751 | 7959777 | BRI3BP    | 0.1054     | 0.0000        | 0.0000        | -0.0407   |
| 4752 | 8036737 | RPS16     | 0.0000     | 0.0000        | 0.0000        | -0.1053   |
| 4753 | 8162449 | ZNF484    | -0.1052    | 0.0000        | 0.0000        | 0.0623    |
| 4754 | 7897648 | PEX14     | 0.0000     | 0.1052        | 0.0000        | 0.0000    |
| 4755 | 7942774 | AQP11     | 0.0430     | 0.0000        | 0.0000        | -0.1051   |
| 4756 | 8071671 | GNAZ      | 0.0000     | 0.0000        | -0.1050       | 0.0000    |
| 4757 | 8098654 | KLKB1     | -0.1050    | 0.0000        | 0.0000        | 0.0000    |
| 4758 | 7893364 | ---       | 0.1050     | -0.0963       | 0.0000        | 0.0000    |
| 4759 | 8090664 | ASTE1     | 0.0000     | 0.0000        | 0.1049        | 0.0000    |
| 4760 | 8052735 | CNRIP1    | 0.0000     | 0.1049        | 0.0000        | -0.0159   |
| 4761 | 8164194 | ---       | 0.0000     | 0.1049        | 0.0000        | 0.0000    |
| 4762 | 8110666 | TRIM52    | 0.1049     | 0.0000        | -0.0545       | 0.0000    |
| 4763 | 8133845 | ---       | 0.1049     | 0.0000        | 0.0000        | -0.0704   |
| 4764 | 8117510 | HMGN4     | 0.0000     | 0.0000        | 0.0000        | -0.1049   |
| 4765 | 7938368 | ---       | 0.0000     | 0.1048        | 0.0000        | 0.0000    |
| 4766 | 8174092 | ARMCX2    | 0.0000     | 0.1048        | -0.0871       | 0.0000    |
| 4767 | 8122343 | HECA      | 0.0000     | 0.0000        | 0.1048        | 0.0000    |
| 4768 | 8170590 | NSDHL     | 0.0000     | 0.1048        | -0.0485       | 0.0000    |
| 4769 | 8156826 | TGFBR1    | 0.0000     | -0.0073       | 0.1047        | 0.0000    |
| 4770 | 7910706 | LGALS8    | -0.0422    | 0.0000        | 0.0000        | 0.1046    |
| 4771 | 8145799 | UNC5D     | 0.0000     | 0.0000        | 0.0000        | -0.1045   |
| 4772 | 8135697 | ANKRD7    | 0.0040     | 0.0000        | -0.1045       | 0.0000    |

| #    | ID      | Name     | SDHB.score | SDHD-AT.score | SDHD-HN.score | VHL.score |
|------|---------|----------|------------|---------------|---------------|-----------|
| 4773 | 8105063 | ---      | 0.0000     | 0.0000        | 0.1041        | 0.0000    |
| 4774 | 7970989 | C13orf38 | 0.0000     | 0.0000        | 0.0000        | -0.1041   |
| 4775 | 8047677 | CD28     | -0.0902    | 0.0000        | 0.1041        | 0.0096    |
| 4776 | 7896495 | ---      | 0.0000     | 0.1041        | 0.0000        | 0.0000    |
| 4777 | 8164967 | VAV2     | 0.0000     | 0.0000        | -0.1040       | 0.0229    |
| 4778 | 7971513 | ESD      | 0.0000     | 0.0248        | 0.0000        | -0.1040   |
| 4779 | 7986755 | MAGEL2   | 0.0659     | 0.0000        | -0.1040       | 0.0000    |
| 4780 | 7895971 | ---      | 0.0088     | 0.0000        | -0.1040       | 0.0000    |
| 4781 | 7900413 | ZMPSTE24 | -0.1039    | 0.0000        | 0.0766        | 0.0000    |
| 4782 | 8149289 | SOX7     | 0.0000     | 0.0000        | 0.0000        | 0.1038    |
| 4783 | 8082133 | PDIA5    | 0.0000     | 0.0000        | 0.0000        | 0.1038    |
| 4784 | 7893632 | ---      | 0.1038     | 0.0000        | 0.0000        | 0.0000    |
| 4785 | 8156838 | SEC61B   | 0.0217     | 0.0000        | 0.0000        | -0.1038   |
| 4786 | 7946641 | GALNTL4  | 0.0453     | 0.0000        | -0.1038       | 0.0000    |
| 4787 | 7920852 | KIAA0907 | 0.0525     | 0.0000        | -0.1037       | 0.0000    |
| 4788 | 8049530 | LRRFIP1  | -0.0714    | 0.0000        | 0.0000        | 0.1035    |
| 4789 | 8023165 | HDHD2    | 0.0000     | 0.0000        | -0.1035       | 0.0000    |
| 4790 | 8089647 | KIAA2018 | -0.0713    | 0.0000        | 0.1034        | 0.0000    |
| 4791 | 8171180 | ---      | 0.0000     | -0.0579       | 0.0000        | 0.1032    |
| 4792 | 8097256 | FGF2     | 0.0236     | 0.0000        | 0.0000        | -0.1032   |
| 4793 | 8171182 | PRKX     | 0.0000     | 0.0000        | 0.1032        | 0.0000    |
| 4794 | 8027760 | FXYD1    | -0.1032    | 0.0000        | 0.0377        | 0.0000    |
| 4795 | 7950294 | CHCHD8   | 0.1032     | 0.0000        | 0.0000        | 0.0000    |
| 4796 | 8042801 | DGUOK    | 0.0000     | 0.1031        | 0.0000        | -0.0597   |
| 4797 | 8171136 | P2RY8    | -0.1031    | 0.0000        | 0.0571        | 0.0636    |
| 4798 | 8135638 | ST7      | 0.0809     | 0.0000        | -0.1030       | 0.0000    |
| 4799 | 7924760 | ITPKB    | -0.0318    | 0.0000        | 0.1030        | 0.0000    |
| 4800 | 8144121 | PTPRN2   | 0.0977     | 0.0000        | 0.0000        | -0.1030   |
| 4801 | 8007250 | NAGLU    | 0.0000     | 0.0000        | 0.0000        | -0.1029   |
| 4802 | 7936280 | ---      | 0.0000     | 0.1029        | 0.0000        | 0.0000    |
| 4803 | 7893335 | ---      | 0.0000     | 0.0000        | 0.0000        | 0.1029    |
| 4804 | 8044491 | CHCHD5   | 0.0000     | 0.0465        | 0.0000        | -0.1029   |
| 4805 | 7999608 | RRN3     | 0.1028     | 0.0000        | -0.0116       | 0.0000    |
| 4806 | 8073104 | SYNGR1   | 0.0501     | 0.0000        | 0.0000        | -0.1027   |
| 4807 | 7892835 | ---      | 0.0000     | 0.1027        | 0.0000        | -0.0809   |
| 4808 | 8078173 | OXNAD1   | 0.0000     | 0.0000        | 0.0000        | -0.1027   |
| 4809 | 7894732 | ---      | 0.0000     | 0.1027        | 0.0000        | 0.0000    |
| 4810 | 7905329 | MLLT11   | 0.0607     | 0.0000        | 0.0000        | -0.1027   |
| 4811 | 8162006 | GKAP1    | 0.0350     | 0.0401        | -0.1026       | -0.0002   |
| 4812 | 8016088 | CCDC43   | 0.0000     | 0.1002        | 0.0000        | -0.1026   |
| 4813 | 7944850 | TBRG1    | 0.1026     | 0.0000        | 0.0000        | 0.0000    |
| 4814 | 8069448 | ---      | 0.0000     | 0.0000        | -0.1026       | 0.0000    |
| 4815 | 7936100 | CALHM2   | 0.0000     | 0.0000        | 0.1025        | 0.0000    |
| 4816 | 7997239 | PDXDC2   | 0.0000     | 0.0000        | 0.0000        | 0.1025    |
| 4817 | 8075263 | NIPSNAP1 | 0.0000     | 0.0870        | 0.0000        | -0.1025   |
| 4818 | 8053417 | CAPG     | 0.0000     | 0.0000        | 0.1023        | 0.0000    |
| 4819 | 7894167 | ---      | -0.1021    | 0.0000        | 0.0000        | 0.0821    |
| 4820 | 7996448 | NOL3     | 0.0000     | 0.0000        | -0.1021       | 0.0000    |
| 4821 | 8087634 | TUSC2    | 0.0000     | 0.0000        | 0.0000        | -0.1021   |
| 4822 | 8085195 | LHFPL4   | 0.0000     | 0.0000        | 0.0000        | -0.1020   |
| 4823 | 8135172 | ORAI2    | 0.0759     | 0.0000        | 0.0000        | -0.1019   |
| 4824 | 7899829 | S100BPB  | -0.1019    | 0.0000        | 0.0000        | 0.0445    |
| 4825 | 7918593 | RHOC     | 0.0000     | 0.0000        | 0.1019        | 0.0000    |
| 4826 | 8144082 | C7orf13  | 0.1019     | 0.0000        | 0.0000        | -0.0035   |
| 4827 | 8104506 | TRIO     | 0.0000     | 0.0000        | 0.0000        | 0.1018    |
| 4828 | 8093624 | SH3BP2   | -0.0551    | -0.0236       | 0.1018        | 0.0209    |
| 4829 | 7935834 | PDZD7    | 0.0000     | 0.0000        | -0.1017       | 0.0000    |
| 4830 | 8032149 | POLR2E   | 0.0000     | 0.0897        | 0.0000        | -0.1017   |
| 4831 | 8101916 | RG9MTD2  | 0.0000     | 0.0000        | -0.1016       | 0.0000    |
| 4832 | 7951752 | USP28    | 0.0344     | -0.1015       | 0.0000        | 0.0000    |
| 4833 | 7894978 | ---      | 0.0000     | 0.1014        | 0.0000        | -0.0513   |
| 4834 | 8149685 | LGI3     | 0.0000     | 0.0000        | -0.1013       | 0.0000    |

| #    | ID      | Name         | SDHB.score | SDHD-AT.score | SDHD-HN.score | VHL.score |
|------|---------|--------------|------------|---------------|---------------|-----------|
| 4835 | 8075778 | TXN2         | 0.0000     | 0.1013        | 0.0000        | 0.0000    |
| 4836 | 7902345 | TYW3         | -0.1013    | 0.0000        | 0.0000        | 0.0000    |
| 4837 | 8048234 | ARPC2        | 0.0000     | 0.0000        | 0.1012        | 0.0000    |
| 4838 | 7989670 | RBPM52       | 0.0000     | 0.0000        | 0.0000        | 0.1012    |
| 4839 | 7893297 | ---          | 0.0000     | 0.1012        | 0.0000        | -0.0712   |
| 4840 | 8072382 | OSBP2        | 0.0542     | 0.0000        | -0.1011       | 0.0000    |
| 4841 | 7932227 | NMT2         | 0.0000     | 0.0000        | 0.0000        | -0.1011   |
| 4842 | 7962146 | FAM60A       | -0.1011    | 0.0000        | 0.0000        | 0.0413    |
| 4843 | 7897068 | SKI          | -0.0516    | 0.0000        | 0.1010        | 0.0000    |
| 4844 | 7921895 | C1orf111     | 0.0000     | 0.0000        | -0.1010       | 0.0000    |
| 4845 | 8011200 | SMYD4        | 0.1010     | 0.0000        | 0.0000        | 0.0000    |
| 4846 | 7976160 | TDP1         | 0.0000     | 0.0000        | 0.0000        | 0.1010    |
| 4847 | 8146945 | GDAP1        | 0.0000     | 0.0000        | 0.0000        | -0.1010   |
| 4848 | 7896156 | ---          | 0.0903     | -0.1009       | 0.0000        | 0.0000    |
| 4849 | 8037750 | IGFL4        | 0.1008     | 0.0000        | 0.0000        | 0.0000    |
| 4850 | 8015396 | HAP1         | 0.0000     | 0.0883        | 0.0000        | -0.1008   |
| 4851 | 8140107 | DNAJC30      | 0.0000     | 0.0620        | 0.0000        | -0.1008   |
| 4852 | 8125850 | C6orf106     | 0.0033     | 0.0000        | 0.0000        | -0.1006   |
| 4853 | 7929719 | C10orf28     | 0.0000     | 0.0000        | 0.0000        | 0.1006    |
| 4854 | 8072360 | TCN2         | -0.1005    | 0.0000        | 0.0350        | 0.0768    |
| 4855 | 7972369 | UGGT2        | 0.0000     | 0.0000        | 0.1004        | 0.0000    |
| 4856 | 7894513 | ---          | 0.0000     | 0.1004        | 0.0000        | 0.0000    |
| 4857 | 8117987 | C6orf136     | 0.0052     | 0.0000        | 0.0000        | -0.1004   |
| 4858 | 8141490 | PMS2L1       | 0.1003     | 0.0000        | -0.0280       | 0.0000    |
| 4859 | 8125470 | HLA-DOB      | 0.0000     | -0.0607       | 0.1002        | 0.0000    |
| 4860 | 8056426 | TTC21B       | 0.0000     | 0.0000        | 0.0000        | 0.1002    |
| 4861 | 8138824 | SCRN1        | 0.0000     | 0.0327        | 0.0000        | -0.1001   |
| 4862 | 7931888 | ANKRD16      | 0.1001     | 0.0000        | 0.0000        | -0.0166   |
| 4863 | 7945349 | BET1L        | 0.0397     | 0.0000        | 0.0000        | -0.1000   |
| 4864 | 8055261 | RAB6C        | 0.0998     | 0.0000        | 0.0000        | 0.0000    |
| 4865 | 7982117 | GABRG3       | 0.0997     | 0.0000        | 0.0000        | -0.0177   |
| 4866 | 8112519 | ---          | -0.0997    | 0.0000        | 0.0000        | 0.0000    |
| 4867 | 8022320 | NPIPL3       | 0.0000     | -0.0016       | 0.0000        | 0.0997    |
| 4868 | 8049435 | SH3BP4       | 0.0000     | -0.0334       | 0.0995        | 0.0000    |
| 4869 | 8105153 | NNT          | 0.0995     | 0.0000        | 0.0000        | -0.0476   |
| 4870 | 8133070 | ---          | 0.0000     | 0.0995        | 0.0000        | 0.0000    |
| 4871 | 7893244 | ---          | 0.0000     | 0.0000        | -0.0994       | 0.0000    |
| 4872 | 7952185 | DPAGT1       | 0.0994     | 0.0000        | 0.0000        | 0.0000    |
| 4873 | 8065719 | PXMP4        | 0.0417     | 0.0000        | 0.0000        | -0.0994   |
| 4874 | 8031837 | ZNF587       | 0.0000     | 0.0000        | 0.0000        | 0.0994    |
| 4875 | 7941179 | CAPN1        | 0.0994     | 0.0000        | 0.0000        | 0.0000    |
| 4876 | 7944401 | HMBS         | 0.0993     | 0.0000        | 0.0000        | -0.0642   |
| 4877 | 7991159 | LOC388152    | 0.0993     | 0.0000        | 0.0000        | -0.0286   |
| 4878 | 8138086 | ---          | -0.0992    | 0.0000        | 0.0985        | 0.0685    |
| 4879 | 7894485 | ---          | 0.0216     | 0.0000        | 0.0000        | -0.0992   |
| 4880 | 7895841 | ---          | 0.0991     | 0.0000        | 0.0000        | 0.0000    |
| 4881 | 8142585 | CADPS2       | -0.0581    | 0.0000        | 0.0000        | 0.0991    |
| 4882 | 8060997 | SPTLC3       | -0.0991    | 0.0000        | 0.0891        | 0.0714    |
| 4883 | 7894202 | ---          | 0.0990     | 0.0000        | 0.0000        | -0.0327   |
| 4884 | 7948211 | SSRP1        | 0.0000     | -0.0990       | 0.0000        | 0.0000    |
| 4885 | 8056966 | ---          | 0.0000     | 0.0817        | 0.0000        | -0.0990   |
| 4886 | 7950082 | LOC100133315 | 0.0000     | -0.0990       | 0.0000        | 0.0000    |
| 4887 | 7924150 | TMEM206      | 0.0000     | 0.0000        | 0.0000        | -0.0989   |
| 4888 | 8132188 | AVL9         | 0.0000     | 0.0989        | 0.0000        | 0.0000    |
| 4889 | 7952522 | PUS3         | 0.0989     | 0.0000        | 0.0000        | -0.0208   |
| 4890 | 8131205 | SDK1         | 0.0989     | 0.0000        | 0.0000        | -0.0418   |
| 4891 | 7914141 | RPA2         | -0.0989    | 0.0000        | 0.0000        | 0.0000    |
| 4892 | 7953383 | SCARNA10     | -0.0061    | 0.0000        | 0.0000        | 0.0988    |
| 4893 | 8053666 | ---          | 0.0000     | 0.0000        | 0.0988        | 0.0000    |
| 4894 | 8048304 | CTDSP1       | -0.0988    | 0.0000        | 0.0000        | 0.0000    |
| 4895 | 8112312 | DIMT1L       | 0.0000     | 0.0000        | 0.0987        | 0.0000    |
| 4896 | 8086372 | ULK4         | 0.0000     | 0.0000        | 0.0987        | 0.0000    |

| #    | ID                   | Name | SDHB.score | SDHD-AT.score | SDHD-HN.score | VHL.score |
|------|----------------------|------|------------|---------------|---------------|-----------|
| 4897 | 7894251 ---          |      | 0.0986     | 0.0000        | 0.0000        | 0.0000    |
| 4898 | 8013776 C17orf63     |      | 0.0985     | 0.0000        | 0.0000        | -0.0694   |
| 4899 | 8003116 HSDL1        |      | 0.0559     | 0.0000        | 0.0000        | -0.0985   |
| 4900 | 8017711 GNA13        |      | 0.0985     | 0.0000        | 0.0000        | -0.0327   |
| 4901 | 7893006 ---          |      | 0.0984     | 0.0000        | 0.0000        | -0.0222   |
| 4902 | 7916984 ---          |      | -0.0984    | 0.0225        | 0.0000        | 0.0000    |
| 4903 | 8012110 GABARAP      |      | 0.0000     | 0.0000        | 0.0000        | -0.0984   |
| 4904 | 8167758 GPR173       |      | 0.0983     | 0.0000        | 0.0000        | 0.0000    |
| 4905 | 8150266 LSM1         |      | 0.0000     | 0.0000        | 0.0000        | -0.0983   |
| 4906 | 8091188 ---          |      | 0.0000     | -0.0982       | 0.0000        | 0.0394    |
| 4907 | 7983843 TCF12        |      | 0.0000     | 0.0000        | 0.0982        | 0.0000    |
| 4908 | 7896663 ---          |      | 0.0982     | 0.0000        | 0.0000        | -0.0841   |
| 4909 | 8057713 MSTN         |      | -0.0981    | 0.0000        | 0.0000        | 0.0000    |
| 4910 | 8006237 LOC400590    |      | -0.0981    | 0.0000        | 0.0434        | 0.0000    |
| 4911 | 8123598 SERPINB1     |      | -0.0981    | 0.0000        | 0.0200        | 0.0000    |
| 4912 | 8107470 PTMA         |      | 0.0000     | -0.0318       | 0.0980        | 0.0000    |
| 4913 | 7906501 ATP1A2       |      | -0.0919    | 0.0000        | 0.0000        | 0.0980    |
| 4914 | 7895677 ---          |      | 0.0000     | 0.0000        | 0.0000        | -0.0980   |
| 4915 | 8140070 TBL2         |      | 0.0978     | 0.0000        | -0.0065       | 0.0000    |
| 4916 | 8101874 ADH1A        |      | -0.0978    | 0.0000        | 0.0000        | 0.0741    |
| 4917 | 8097017 UGT8         |      | 0.0000     | 0.0000        | 0.0978        | -0.0373   |
| 4918 | 8047086 NAB1         |      | 0.0000     | 0.0000        | 0.0977        | 0.0000    |
| 4919 | 8090737 NPHP3        |      | -0.0976    | 0.0000        | 0.0000        | 0.0000    |
| 4920 | 8053576 RNF103       |      | 0.0000     | 0.0000        | 0.0000        | -0.0976   |
| 4921 | 8079693 WDR6         |      | 0.0976     | 0.0000        | 0.0000        | -0.0409   |
| 4922 | 7979033 SAV1         |      | -0.0256    | 0.0000        | 0.0975        | 0.0000    |
| 4923 | 8066161 C20orf132    |      | 0.0000     | 0.0000        | 0.0000        | -0.0974   |
| 4924 | 8002211 DDX28        |      | 0.0000     | 0.0000        | 0.0000        | -0.0973   |
| 4925 | 8177782 RPP21        |      | 0.0000     | 0.0000        | 0.0000        | -0.0972   |
| 4926 | 8059642 SLC16A14     |      | 0.0000     | 0.0000        | 0.0972        | 0.0000    |
| 4927 | 7894311 ---          |      | 0.0463     | -0.0972       | 0.0000        | 0.0000    |
| 4928 | 8165676 ---          |      | 0.0000     | 0.0000        | 0.0000        | -0.0972   |
| 4929 | 8034151 DOCK6        |      | -0.0141    | -0.0972       | 0.0000        | 0.0681    |
| 4930 | 7946245 DCHS1        |      | 0.0000     | 0.0000        | 0.0971        | 0.0000    |
| 4931 | 7899424 ATP1F1       |      | -0.0971    | 0.0000        | 0.0000        | 0.0000    |
| 4932 | 8110318 PRELID1      |      | 0.0000     | 0.0000        | 0.0000        | -0.0971   |
| 4933 | 7901073 UROD         |      | -0.0941    | 0.0971        | 0.0000        | 0.0000    |
| 4934 | 8142110 SYPL1        |      | 0.0000     | 0.0000        | 0.0970        | 0.0000    |
| 4935 | 7895192 ---          |      | 0.0056     | -0.0969       | 0.0000        | 0.0000    |
| 4936 | 7911619 GNB1         |      | -0.0969    | 0.0000        | 0.0000        | 0.0000    |
| 4937 | 8023871 ZADH2        |      | 0.0000     | 0.0000        | -0.0969       | 0.0000    |
| 4938 | 7945831 OSBPL5       |      | 0.0000     | 0.0000        | 0.0969        | 0.0000    |
| 4939 | 7915485 EBNA1BP2     |      | -0.0969    | 0.0472        | 0.0000        | 0.0000    |
| 4940 | 8041179 CLIP4        |      | 0.0000     | 0.0967        | 0.0000        | 0.0000    |
| 4941 | 8143433 MRPS33       |      | 0.0000     | 0.0967        | 0.0000        | 0.0000    |
| 4942 | 8119403 APOBEC2      |      | 0.0000     | 0.0000        | 0.0000        | 0.0967    |
| 4943 | 7904254 ATP1A1       |      | 0.0000     | 0.0964        | 0.0000        | 0.0000    |
| 4944 | 8036302 LOC100127980 |      | 0.0964     | 0.0000        | -0.0477       | 0.0000    |
| 4945 | 7933180 ZNF239       |      | 0.0964     | 0.0000        | 0.0000        | 0.0000    |
| 4946 | 8014073 C17orf79     |      | 0.0000     | 0.0964        | 0.0000        | -0.0544   |
| 4947 | 7906728 TOMM40L      |      | 0.0000     | 0.0000        | 0.0000        | -0.0963   |
| 4948 | 7947425 CD59         |      | -0.0289    | 0.0000        | 0.0963        | 0.0000    |
| 4949 | 7895877 ---          |      | -0.0962    | 0.0000        | 0.0000        | 0.0856    |
| 4950 | 8149699 PHYHIP       |      | -0.0962    | 0.0000        | 0.0000        | 0.0000    |
| 4951 | 8139299 POLD2        |      | 0.0000     | 0.0738        | -0.0962       | 0.0000    |
| 4952 | 8154725 KRT18        |      | 0.0000     | 0.0000        | 0.0000        | 0.0961    |
| 4953 | 7925174 TOMM20       |      | 0.0961     | 0.0000        | -0.0584       | -0.0375   |
| 4954 | 8180299 ---          |      | 0.0446     | 0.0000        | 0.0000        | -0.0961   |
| 4955 | 8161458 KGFLP2       |      | 0.0000     | 0.0000        | -0.0961       | 0.0000    |
| 4956 | 7892906 ---          |      | 0.0000     | 0.0000        | 0.0000        | -0.0960   |
| 4957 | 8028084 APLP1        |      | 0.0477     | 0.0960        | -0.0476       | -0.0775   |
| 4958 | 8009727 ICT1         |      | 0.0000     | 0.0429        | 0.0000        | -0.0960   |



| #    | ID      | Name        | SDHB.score | SDHD-AT.score | SDHD-HN.score | VHL.score |
|------|---------|-------------|------------|---------------|---------------|-----------|
| 4959 | 8009476 | MAP2K6      | 0.0000     | 0.0000        | 0.0000        | -0.0959   |
| 4960 | 8166264 | ---         | -0.0959    | 0.0000        | 0.0902        | 0.0688    |
| 4961 | 7981919 | SNRPN       | 0.0000     | 0.0959        | 0.0000        | 0.0000    |
| 4962 | 8117330 | HIST1H3A    | 0.0695     | 0.0000        | 0.0000        | -0.0958   |
| 4963 | 8168868 | ARMCX1      | 0.0000     | 0.0451        | 0.0000        | -0.0958   |
| 4964 | 7945620 | TOLLIP      | 0.0856     | 0.0000        | 0.0000        | -0.0958   |
| 4965 | 8001924 | FAM96B      | 0.0000     | 0.0242        | 0.0000        | -0.0958   |
| 4966 | 8149534 | ASAH1       | 0.0099     | 0.0000        | 0.0000        | -0.0957   |
| 4967 | 7894057 | ---         | 0.0000     | 0.0000        | 0.0000        | -0.0957   |
| 4968 | 7950606 | RSF1        | 0.0957     | 0.0000        | 0.0000        | 0.0000    |
| 4969 | 7896566 | ---         | -0.0956    | 0.0000        | 0.0000        | 0.0000    |
| 4970 | 7999916 | GPR139      | 0.0000     | -0.0955       | 0.0000        | 0.0004    |
| 4971 | 7952810 | IGSF9B      | 0.0802     | 0.0000        | -0.0954       | 0.0000    |
| 4972 | 7984112 | RAB8B       | -0.0954    | 0.0000        | 0.0840        | 0.0000    |
| 4973 | 7965090 | CSRP2       | 0.0000     | 0.0000        | 0.0954        | 0.0000    |
| 4974 | 7948249 | SLC43A1     | 0.0000     | 0.0000        | 0.0954        | 0.0000    |
| 4975 | 7970810 | SLC7A1      | 0.0954     | 0.0000        | 0.0000        | -0.0892   |
| 4976 | 7934961 | FLJ37201    | 0.0389     | 0.0000        | 0.0000        | -0.0953   |
| 4977 | 7950796 | CREBZF      | 0.0000     | -0.0953       | 0.0000        | 0.0000    |
| 4978 | 7939805 | SLC39A13    | 0.0363     | 0.0000        | 0.0000        | -0.0953   |
| 4979 | 8036744 | EID2B       | 0.0952     | 0.0000        | 0.0000        | -0.0579   |
| 4980 | 7894185 | ---         | 0.0000     | 0.0555        | 0.0228        | -0.0952   |
| 4981 | 8171516 | RBBP7       | 0.0000     | 0.0000        | 0.0000        | 0.0952    |
| 4982 | 7895887 | ---         | 0.0951     | 0.0000        | 0.0000        | 0.0000    |
| 4983 | 7924351 | EPRS        | 0.0951     | 0.0000        | 0.0000        | -0.0315   |
| 4984 | 8072015 | ADRBK2      | 0.0942     | 0.0000        | 0.0000        | -0.0950   |
| 4985 | 7923712 | RBBP5       | 0.0950     | 0.0000        | 0.0000        | -0.0086   |
| 4986 | 7945539 | SLC25A22    | 0.0228     | 0.0000        | 0.0000        | -0.0950   |
| 4987 | 7946957 | SAAL1       | 0.0483     | 0.0000        | 0.0000        | -0.0949   |
| 4988 | 7984408 | MAP2K5      | 0.0000     | 0.0000        | -0.0949       | 0.0000    |
| 4989 | 8097443 | ---         | 0.0949     | 0.0000        | 0.0000        | -0.0086   |
| 4990 | 8180377 | ---         | 0.0000     | 0.0000        | -0.0948       | 0.0000    |
| 4991 | 7907537 | CACYBP      | 0.0948     | 0.0000        | 0.0000        | -0.0092   |
| 4992 | 7955250 | PRPF40B     | 0.0948     | 0.0000        | 0.0000        | 0.0000    |
| 4993 | 8090840 | RYK         | -0.0036    | 0.0000        | 0.0947        | 0.0000    |
| 4994 | 8095360 | ---         | 0.0000     | 0.0947        | 0.0000        | 0.0000    |
| 4995 | 7896230 | ---         | 0.0947     | 0.0000        | 0.0000        | 0.0000    |
| 4996 | 8139891 | SBDS        | 0.0602     | 0.0000        | 0.0000        | -0.0946   |
| 4997 | 7901038 | RPS8        | -0.0175    | 0.0945        | 0.0000        | 0.0000    |
| 4998 | 7969256 | LOC220115   | -0.0504    | 0.0000        | 0.0945        | 0.0000    |
| 4999 | 7899220 | ARID1A      | -0.0945    | 0.0000        | 0.0000        | 0.0735    |
| 5000 | 8118100 | MICA        | -0.0888    | 0.0000        | 0.0944        | 0.0000    |
| 5001 | 8018558 | ACOX1       | 0.0038     | 0.0000        | 0.0000        | -0.0944   |
| 5002 | 8100699 | SYT14L      | 0.0943     | 0.0000        | -0.0288       | -0.0412   |
| 5003 | 8155770 | SMC5        | 0.0000     | -0.0301       | 0.0000        | 0.0943    |
| 5004 | 7896629 | ---         | 0.0000     | -0.0171       | 0.0000        | 0.0943    |
| 5005 | 8180388 | ---         | -0.0590    | 0.0000        | 0.0943        | 0.0000    |
| 5006 | 8018482 | WBP2        | 0.0000     | 0.0767        | 0.0000        | -0.0942   |
| 5007 | 7894583 | ---         | 0.0000     | 0.0000        | -0.0942       | 0.0000    |
| 5008 | 8010092 | MFSD11      | 0.0000     | 0.0941        | 0.0000        | 0.0000    |
| 5009 | 7981994 | SNORD116-23 | 0.0000     | 0.0299        | -0.0940       | 0.0000    |
| 5010 | 8062312 | MYL9        | -0.0729    | 0.0000        | 0.0940        | 0.0000    |
| 5011 | 8079334 | LIMD1       | -0.0940    | 0.0000        | 0.0000        | 0.0491    |
| 5012 | 8123562 | GMDS        | 0.0000     | 0.0000        | 0.0000        | -0.0940   |
| 5013 | 7958620 | IFT81       | 0.0000     | 0.0000        | 0.0000        | 0.0940    |
| 5014 | 7940377 | TMEM132A    | 0.0939     | 0.0000        | -0.0586       | 0.0000    |
| 5015 | 8075635 | TIMP3       | -0.0939    | 0.0000        | 0.0092        | 0.0407    |
| 5016 | 8068810 | SLC37A1     | 0.0000     | 0.0000        | -0.0938       | 0.0000    |
| 5017 | 8116929 | RPL15       | 0.0000     | 0.0000        | 0.0000        | -0.0938   |
| 5018 | 7941382 | KAT5        | 0.0937     | 0.0000        | -0.0064       | 0.0000    |
| 5019 | 8142718 | GRM8        | -0.0402    | 0.0937        | 0.0326        | 0.0000    |
| 5020 | 7912412 | MTOR        | -0.0937    | 0.0000        | 0.0000        | 0.0000    |

| #    | ID      | Name         | SDHB.score | SDHD-AT.score | SDHD-HN.score | VHL.score |
|------|---------|--------------|------------|---------------|---------------|-----------|
| 5021 | 7896030 | ---          | 0.0000     | 0.0000        | 0.0000        | -0.0937   |
| 5022 | 7973433 | DHRS2        | 0.0936     | 0.0000        | -0.0340       | 0.0000    |
| 5023 | 8165094 | QSOX2        | 0.0000     | 0.0000        | -0.0936       | 0.0000    |
| 5024 | 8031669 | ZNF470       | 0.0000     | -0.0935       | 0.0000        | 0.0460    |
| 5025 | 8137336 | ACCN3        | 0.0935     | 0.0000        | -0.0005       | 0.0000    |
| 5026 | 8040045 | COLEC11      | 0.0000     | 0.0000        | 0.0000        | 0.0935    |
| 5027 | 8168691 | DIAPH2       | -0.0935    | 0.0000        | 0.0000        | 0.0000    |
| 5028 | 7942544 | RNF169       | 0.0934     | 0.0000        | 0.0000        | 0.0000    |
| 5029 | 8000543 | CLN3         | 0.0000     | 0.0000        | 0.0000        | -0.0934   |
| 5030 | 7941702 | RBM14        | 0.0000     | -0.0934       | 0.0000        | 0.0000    |
| 5031 | 7966321 | GPN3         | 0.0000     | 0.0000        | 0.0000        | -0.0932   |
| 5032 | 8072817 | CDC42EP1     | -0.0018    | 0.0000        | 0.0932        | 0.0000    |
| 5033 | 8126658 | SLC35B2      | 0.0000     | 0.0000        | 0.0000        | -0.0932   |
| 5034 | 7941127 | ZFPL1        | 0.0932     | 0.0000        | 0.0000        | -0.0890   |
| 5035 | 8043900 | ---          | 0.0000     | 0.0000        | 0.0000        | -0.0932   |
| 5036 | 7912706 | EPHA2        | -0.0738    | -0.0256       | 0.0282        | 0.0931    |
| 5037 | 7936968 | ADAM12       | 0.0000     | -0.0527       | 0.0930        | 0.0000    |
| 5038 | 7924119 | INTS7        | 0.0930     | 0.0000        | 0.0000        | 0.0000    |
| 5039 | 8090433 | MGLL         | 0.0000     | -0.0930       | 0.0000        | 0.0000    |
| 5040 | 8160839 | DCTN3        | 0.0000     | 0.0930        | 0.0000        | -0.0060   |
| 5041 | 8027692 | ZNF30        | 0.0000     | 0.0000        | 0.0000        | -0.0929   |
| 5042 | 8150974 | ---          | 0.0000     | 0.0000        | 0.0000        | 0.0929    |
| 5043 | 7978376 | STXPB6       | 0.0738     | 0.0000        | 0.0000        | -0.0929   |
| 5044 | 7928318 | CCDC109A     | 0.0000     | 0.0000        | 0.0929        | 0.0000    |
| 5045 | 8063382 | SNAI1        | -0.0871    | 0.0000        | 0.0928        | 0.0000    |
| 5046 | 7959292 | ---          | -0.0928    | 0.0861        | 0.0000        | 0.0000    |
| 5047 | 7957271 | ---          | 0.0000     | 0.0883        | 0.0000        | -0.0928   |
| 5048 | 8126442 | TBCC         | 0.0000     | 0.0000        | 0.0000        | -0.0928   |
| 5049 | 7902957 | EPHX4        | 0.0000     | 0.0928        | 0.0000        | 0.0000    |
| 5050 | 8075956 | LGALS2       | 0.0000     | 0.0000        | 0.0927        | 0.0000    |
| 5051 | 7896456 | ---          | 0.0758     | -0.0927       | 0.0000        | 0.0000    |
| 5052 | 7895052 | ---          | 0.0885     | -0.0926       | 0.0000        | 0.0000    |
| 5053 | 8025328 | EVI5L        | 0.0322     | 0.0000        | 0.0000        | -0.0926   |
| 5054 | 8175490 | ---          | -0.0926    | 0.0000        | 0.0000        | 0.0696    |
| 5055 | 7893134 | ---          | 0.0000     | -0.0925       | 0.0000        | 0.0000    |
| 5056 | 7929664 | DHDPSL       | 0.0925     | 0.0000        | 0.0000        | 0.0000    |
| 5057 | 8180355 | ---          | 0.0000     | 0.0000        | 0.0000        | -0.0924   |
| 5058 | 7989915 | TIPIN        | 0.0923     | 0.0000        | 0.0000        | 0.0000    |
| 5059 | 7941111 | SNX15        | 0.0453     | 0.0000        | 0.0000        | -0.0923   |
| 5060 | 8156295 | SECISBP2     | 0.0000     | 0.0000        | 0.0000        | 0.0922    |
| 5061 | 7999841 | SMG1         | 0.0000     | -0.0204       | 0.0000        | 0.0921    |
| 5062 | 8077781 | VHL          | 0.0000     | 0.0000        | 0.0000        | -0.0921   |
| 5063 | 8178526 | BAT3         | 0.0000     | 0.0000        | 0.0000        | -0.0921   |
| 5064 | 7945071 | FOXRED1      | 0.0920     | 0.0000        | 0.0000        | 0.0000    |
| 5065 | 8064539 | CPXM1        | -0.0435    | 0.0000        | 0.0920        | 0.0000    |
| 5066 | 7958375 | ---          | 0.0000     | 0.0000        | 0.0919        | 0.0000    |
| 5067 | 7952453 | ROBO4        | -0.0919    | 0.0000        | 0.0454        | 0.0471    |
| 5068 | 7895708 | ---          | 0.0000     | 0.0000        | -0.0918       | 0.0000    |
| 5069 | 8041617 | MTA3         | 0.0000     | 0.0000        | -0.0916       | 0.0000    |
| 5070 | 8108593 | WDR55        | 0.0841     | 0.0000        | 0.0000        | -0.0916   |
| 5071 | 8155503 | LOC100132167 | -0.0914    | 0.0000        | 0.0000        | 0.0773    |
| 5072 | 7894356 | ---          | -0.0914    | 0.0000        | 0.0000        | 0.0507    |
| 5073 | 8054486 | NPHP1        | 0.0000     | 0.0000        | 0.0000        | 0.0914    |
| 5074 | 7918504 | OVGP1        | -0.0914    | 0.0000        | 0.0000        | 0.0000    |
| 5075 | 7909214 | RASSF5       | 0.0000     | -0.0914       | 0.0000        | 0.0000    |
| 5076 | 7956031 | ORMDL2       | 0.0000     | 0.0000        | 0.0000        | -0.0913   |
| 5077 | 7978956 | L2HGDH       | 0.0220     | 0.0913        | 0.0000        | -0.0765   |
| 5078 | 7897561 | KIF1B        | -0.0635    | 0.0000        | 0.0000        | 0.0913    |
| 5079 | 8017831 | C17orf58     | 0.0000     | 0.0000        | 0.0000        | -0.0913   |
| 5080 | 8124967 | BAT3         | 0.0000     | 0.0000        | 0.0000        | -0.0912   |
| 5081 | 8068397 | ---          | 0.0000     | -0.0912       | 0.0000        | 0.0000    |
| 5082 | 8127201 | COL21A1      | 0.0000     | -0.0912       | 0.0392        | 0.0061    |

| #    | ID      | Name      | SDHB.score | SDHD-AT.score | SDHD-HN.score | VHL.score |
|------|---------|-----------|------------|---------------|---------------|-----------|
| 5083 | 7962516 | SLC38A1   | 0.0911     | 0.0000        | -0.0740       | -0.0461   |
| 5084 | 7916225 | ---       | 0.0000     | 0.0000        | 0.0000        | -0.0911   |
| 5085 | 8172358 | UXT       | 0.0000     | 0.0911        | 0.0000        | -0.0095   |
| 5086 | 8024219 | ATP5D     | 0.0000     | 0.0000        | 0.0000        | -0.0911   |
| 5087 | 7936809 | FAM24B    | 0.0910     | 0.0000        | 0.0000        | 0.0000    |
| 5088 | 8089299 | CD47      | 0.0000     | 0.0000        | 0.0910        | -0.0364   |
| 5089 | 8070010 | SYNJ1     | 0.0000     | 0.0910        | 0.0000        | -0.0517   |
| 5090 | 7998136 | RHBDF1    | 0.0000     | 0.0000        | 0.0910        | 0.0000    |
| 5091 | 8142622 | RNF148    | -0.0891    | 0.0000        | 0.0000        | 0.0910    |
| 5092 | 7938738 | KCNC1     | 0.0000     | 0.0000        | 0.0000        | -0.0910   |
| 5093 | 8165794 | CD99      | 0.0000     | 0.0000        | 0.0701        | -0.0909   |
| 5094 | 7958565 | MVK       | 0.0000     | 0.0000        | -0.0909       | 0.0000    |
| 5095 | 8102214 | PAPSS1    | 0.0000     | 0.0000        | 0.0909        | 0.0000    |
| 5096 | 8112033 | ARL15     | -0.0646    | 0.0000        | 0.0908        | 0.0000    |
| 5097 | 8063650 | NPEPL1    | 0.0000     | -0.0459       | 0.0000        | 0.0908    |
| 5098 | 8078729 | MYD88     | -0.0303    | 0.0000        | 0.0908        | 0.0000    |
| 5099 | 7982957 | MGA       | 0.0000     | 0.0000        | 0.0000        | 0.0908    |
| 5100 | 8082431 | RAB7A     | 0.0000     | 0.0000        | 0.0000        | -0.0907   |
| 5101 | 8149365 | FAM86B1   | 0.0253     | 0.0000        | 0.0000        | -0.0907   |
| 5102 | 7978114 | FAM158A   | 0.0763     | 0.0000        | -0.0906       | 0.0000    |
| 5103 | 8083656 | MFSD1     | 0.0000     | 0.0000        | 0.0906        | 0.0000    |
| 5104 | 8088065 | SFMBT1    | 0.0906     | 0.0000        | 0.0000        | 0.0000    |
| 5105 | 7896714 | ---       | 0.0000     | 0.0000        | 0.0905        | 0.0000    |
| 5106 | 8137208 | ATP6V0E2  | 0.0000     | 0.0904        | 0.0000        | -0.0574   |
| 5107 | 7895414 | ---       | 0.0904     | -0.0658       | 0.0000        | 0.0000    |
| 5108 | 8156706 | TMOD1     | 0.0000     | 0.0000        | -0.0904       | 0.0000    |
| 5109 | 8096777 | ---       | 0.0904     | 0.0000        | 0.0000        | 0.0000    |
| 5110 | 7958842 | ---       | 0.0000     | 0.0000        | -0.0903       | 0.0000    |
| 5111 | 8154333 | KDM4C     | 0.0000     | 0.0000        | -0.0903       | 0.0551    |
| 5112 | 7893870 | ---       | 0.0000     | 0.0000        | 0.0000        | -0.0903   |
| 5113 | 7893641 | ---       | 0.0902     | 0.0000        | -0.0595       | 0.0000    |
| 5114 | 8143684 | PDIA4     | 0.0901     | 0.0000        | 0.0000        | 0.0000    |
| 5115 | 7912056 | PLEKHG5   | 0.0000     | 0.0000        | 0.0000        | 0.0901    |
| 5116 | 7951008 | TAF1D     | 0.0901     | 0.0000        | 0.0000        | 0.0000    |
| 5117 | 7994813 | ZNF48     | 0.0901     | 0.0000        | 0.0000        | -0.0653   |
| 5118 | 7948864 | STX5      | 0.0900     | 0.0000        | 0.0000        | 0.0000    |
| 5119 | 7895620 | ---       | 0.0899     | 0.0000        | 0.0000        | 0.0000    |
| 5120 | 8045009 | GYPC      | -0.0899    | 0.0000        | 0.0000        | 0.0792    |
| 5121 | 7896594 | ---       | 0.0212     | -0.0899       | 0.0000        | 0.0000    |
| 5122 | 7993195 | CIITA     | 0.0000     | -0.0327       | 0.0898        | 0.0000    |
| 5123 | 8084982 | LOC152217 | 0.0000     | 0.0000        | 0.0000        | -0.0898   |
| 5124 | 7956856 | MSRB3     | 0.0000     | 0.0000        | 0.0897        | 0.0000    |
| 5125 | 7895657 | ---       | 0.0000     | 0.0000        | 0.0897        | 0.0000    |
| 5126 | 8050713 | PFN4      | 0.0897     | 0.0000        | 0.0000        | -0.0012   |
| 5127 | 7971386 | SNORA31   | -0.0443    | 0.0000        | 0.0000        | 0.0896    |
| 5128 | 7942032 | SAPS3     | 0.0896     | -0.0830       | 0.0000        | 0.0000    |
| 5129 | 8033465 | TIMM44    | 0.0119     | 0.0000        | 0.0000        | -0.0896   |
| 5130 | 8052784 | NFU1      | 0.0000     | 0.0000        | 0.0000        | -0.0896   |
| 5131 | 7970498 | LATS2     | -0.0895    | 0.0000        | 0.0229        | 0.0555    |
| 5132 | 7923698 | ---       | 0.0000     | 0.0895        | -0.0880       | 0.0000    |
| 5133 | 7895119 | ---       | 0.0000     | 0.0895        | 0.0000        | -0.0505   |
| 5134 | 8156575 | ATMIN     | 0.0000     | 0.0000        | 0.0000        | -0.0894   |
| 5135 | 8075600 | BPIL2     | 0.0894     | 0.0000        | 0.0000        | -0.0858   |
| 5136 | 8082905 | TMEM22    | 0.0571     | 0.0378        | -0.0058       | -0.0894   |
| 5137 | 7915733 | PRDX1     | -0.0894    | 0.0000        | 0.0000        | 0.0000    |
| 5138 | 8010963 | ---       | 0.0627     | -0.0893       | 0.0000        | 0.0000    |
| 5139 | 7977249 | INF2      | -0.0097    | 0.0000        | 0.0000        | 0.0893    |
| 5140 | 8136591 | ADCK2     | 0.0382     | 0.0000        | -0.0892       | 0.0000    |
| 5141 | 7895863 | ---       | 0.0000     | -0.0892       | 0.0000        | 0.0141    |
| 5142 | 8040458 | KCNS3     | 0.0000     | -0.0710       | 0.0892        | 0.0000    |
| 5143 | 8078450 | CRTAP     | 0.0000     | 0.0000        | 0.0604        | -0.0891   |
| 5144 | 7908732 | IPO9      | 0.0510     | 0.0000        | -0.0891       | 0.0000    |

| #    | ID      | Name          | SDHB.score | SDHD-AT.score | SDHD-HN.score | VHL.score |
|------|---------|---------------|------------|---------------|---------------|-----------|
| 5145 | 8077833 | SLC6A1        | -0.0890    | 0.0000        | 0.0474        | 0.0000    |
| 5146 | 8122982 | ZDHHC14       | 0.0000     | 0.0000        | 0.0889        | 0.0000    |
| 5147 | 8165947 | WWC3          | 0.0000     | -0.0889       | 0.0000        | 0.0000    |
| 5148 | 7894546 | ---           | 0.0889     | 0.0000        | 0.0000        | -0.0844   |
| 5149 | 8178435 | IER3          | -0.0727    | 0.0000        | 0.0888        | 0.0000    |
| 5150 | 7948836 | TMEM223       | 0.0888     | 0.0000        | 0.0000        | -0.0595   |
| 5151 | 7975815 | TTLL5         | -0.0888    | 0.0000        | 0.0000        | 0.0811    |
| 5152 | 8135902 | C7orf54       | 0.0000     | 0.0000        | -0.0888       | 0.0000    |
| 5153 | 7963741 | SMUG1         | 0.0000     | 0.0888        | 0.0000        | -0.0301   |
| 5154 | 7892986 | ---           | 0.0000     | 0.0270        | 0.0000        | -0.0888   |
| 5155 | 8156895 | ---           | 0.0887     | 0.0000        | 0.0000        | 0.0000    |
| 5156 | 7895137 | ---           | 0.0000     | 0.0000        | 0.0000        | -0.0886   |
| 5157 | 7896579 | ---           | 0.0000     | 0.0886        | 0.0000        | -0.0723   |
| 5158 | 7994292 | IL21R         | 0.0000     | 0.0000        | 0.0886        | 0.0000    |
| 5159 | 8012924 | FAM18B2       | 0.0885     | 0.0000        | 0.0000        | 0.0000    |
| 5160 | 8105878 | RAD17         | 0.0000     | 0.0000        | 0.0000        | -0.0885   |
| 5161 | 8163569 | AKNA          | -0.0128    | 0.0000        | 0.0000        | 0.0885    |
| 5162 | 8044473 | POLR1B        | 0.0884     | 0.0000        | 0.0000        | 0.0000    |
| 5163 | 8171587 | PHKA2         | 0.0000     | 0.0000        | -0.0883       | 0.0453    |
| 5164 | 8083146 | PLS1          | 0.0000     | 0.0000        | 0.0000        | -0.0883   |
| 5165 | 7911902 | NPHP4         | 0.0000     | 0.0000        | 0.0000        | 0.0883    |
| 5166 | 7893761 | ---           | 0.0000     | -0.0682       | 0.0000        | 0.0883    |
| 5167 | 8141311 | C7orf38       | 0.0000     | 0.0810        | 0.0000        | -0.0883   |
| 5168 | 8081945 | NDUFB4        | 0.0000     | 0.0501        | 0.0000        | -0.0882   |
| 5169 | 8079733 | KLHDC8B       | 0.0000     | 0.0881        | 0.0000        | -0.0448   |
| 5170 | 8169811 | OCRL          | 0.0778     | 0.0000        | -0.0880       | 0.0000    |
| 5171 | 8145778 | ---           | 0.0000     | 0.0880        | 0.0000        | 0.0000    |
| 5172 | 8141896 | ---           | 0.0000     | 0.0000        | -0.0879       | 0.0362    |
| 5173 | 7960553 | MRPL51        | 0.0000     | 0.0053        | 0.0000        | -0.0879   |
| 5174 | 7999520 | RSL1D1        | 0.0879     | 0.0000        | 0.0000        | -0.0232   |
| 5175 | 7951679 | TIMM8B        | 0.0879     | 0.0000        | 0.0000        | 0.0000    |
| 5176 | 8125835 | RPS10         | 0.0000     | 0.0000        | 0.0000        | -0.0879   |
| 5177 | 7922689 | GLUL          | -0.0047    | -0.0557       | 0.0878        | 0.0000    |
| 5178 | 7948685 | TUT1          | 0.0878     | 0.0000        | 0.0000        | 0.0000    |
| 5179 | 7893031 | ---           | 0.0000     | 0.0000        | 0.0000        | -0.0878   |
| 5180 | 8172914 | HUWE1         | 0.0000     | 0.0000        | -0.0877       | 0.0000    |
| 5181 | 7980547 | SEL1L         | 0.0422     | 0.0000        | 0.0000        | -0.0876   |
| 5182 | 7893833 | ---           | 0.0000     | 0.0000        | 0.0000        | 0.0875    |
| 5183 | 8174201 | BEX1          | 0.0083     | 0.0347        | 0.0000        | -0.0874   |
| 5184 | 8119689 | PTK7          | 0.0361     | -0.0874       | 0.0000        | 0.0000    |
| 5185 | 7895313 | ---           | -0.0255    | 0.0000        | 0.0000        | 0.0874    |
| 5186 | 7920707 | FAM189B       | 0.0874     | 0.0000        | 0.0000        | 0.0000    |
| 5187 | 7943314 | JRKL          | 0.0874     | 0.0000        | 0.0000        | 0.0000    |
| 5188 | 8110486 | DKFZp686E2433 | 0.0873     | 0.0000        | 0.0000        | -0.0047   |
| 5189 | 7975971 | C14orf174     | 0.0000     | 0.0000        | 0.0000        | 0.0873    |
| 5190 | 8120783 | MYO6          | 0.0000     | 0.0000        | 0.0873        | 0.0000    |
| 5191 | 8092514 | MAGEF1        | 0.0078     | 0.0000        | 0.0000        | -0.0872   |
| 5192 | 8069561 | BTF3L4        | 0.0000     | 0.0872        | 0.0000        | 0.0000    |
| 5193 | 8143803 | ATG9B         | 0.0000     | 0.0000        | 0.0000        | 0.0871    |
| 5194 | 8025951 | ZNF491        | 0.0000     | 0.0000        | -0.0871       | 0.0000    |
| 5195 | 7983811 | PIGB          | 0.0193     | 0.0000        | 0.0000        | -0.0871   |
| 5196 | 7938687 | NUCB2         | 0.0870     | 0.0000        | -0.0002       | -0.0638   |
| 5197 | 8142036 | SRPK2         | 0.0869     | 0.0000        | 0.0000        | -0.0152   |
| 5198 | 8162669 | ZNF322A       | 0.0000     | 0.0000        | 0.0000        | -0.0869   |
| 5199 | 8172520 | TFE3          | 0.0000     | 0.0000        | 0.0000        | -0.0868   |
| 5200 | 8165486 | TMEM203       | 0.0000     | 0.0000        | 0.0000        | -0.0868   |
| 5201 | 8135268 | EIF4B         | 0.0825     | 0.0000        | 0.0000        | -0.0868   |
| 5202 | 7905881 | ADAM15        | 0.0000     | 0.0000        | 0.0868        | 0.0000    |
| 5203 | 7957649 | SNRPF         | 0.0000     | 0.0696        | 0.0000        | -0.0867   |
| 5204 | 8042974 | ---           | -0.0722    | 0.0000        | 0.0867        | 0.0000    |
| 5205 | 8166989 | ZNF673        | -0.0598    | 0.0000        | 0.0000        | 0.0867    |
| 5206 | 7990674 | CIB2          | 0.0867     | 0.0000        | 0.0000        | -0.0169   |

| #    | ID      | Name          | SDHB.score | SDHD-AT.score | SDHD-HN.score | VHL.score |
|------|---------|---------------|------------|---------------|---------------|-----------|
| 5207 | 7894607 | ---           | 0.0000     | -0.0785       | 0.0000        | 0.0866    |
| 5208 | 7991088 | LOC388152     | 0.0864     | 0.0000        | 0.0000        | -0.0242   |
| 5209 | 8094101 | CPZ           | 0.0000     | 0.0000        | 0.0864        | 0.0000    |
| 5210 | 7945204 | ST14          | 0.0000     | 0.0000        | 0.0864        | 0.0000    |
| 5211 | 7991070 | HDGFRP3       | 0.0000     | 0.0000        | 0.0000        | -0.0864   |
| 5212 | 7938812 | TMEM86A       | 0.0000     | 0.0000        | 0.0863        | 0.0000    |
| 5213 | 7906746 | SDHC          | 0.0157     | 0.0179        | 0.0000        | -0.0863   |
| 5214 | 7920725 | SCAMP3        | 0.0862     | 0.0000        | 0.0000        | -0.0068   |
| 5215 | 8062137 | CEP250        | 0.0862     | 0.0000        | -0.0432       | 0.0000    |
| 5216 | 8040211 | KLF11         | -0.0448    | 0.0000        | 0.0000        | 0.0862    |
| 5217 | 8027279 | ZNF430        | 0.0000     | 0.0862        | 0.0000        | 0.0000    |
| 5218 | 8127824 | UBE2CBP       | 0.0000     | 0.0000        | 0.0000        | -0.0862   |
| 5219 | 8037723 | IRF2BP1       | 0.0394     | 0.0000        | 0.0000        | -0.0862   |
| 5220 | 8031821 | ZNF586        | 0.0000     | 0.0000        | -0.0861       | 0.0000    |
| 5221 | 7895825 | ---           | -0.0861    | 0.0427        | 0.0000        | 0.0000    |
| 5222 | 8150881 | PLAG1         | 0.0000     | 0.0860        | 0.0000        | -0.0263   |
| 5223 | 7922330 | PIGC          | 0.0860     | 0.0000        | 0.0000        | 0.0000    |
| 5224 | 7972723 | ARGLU1        | -0.0740    | 0.0000        | 0.0000        | 0.0859    |
| 5225 | 8094359 | ---           | 0.0000     | 0.0772        | 0.0000        | -0.0859   |
| 5226 | 8011293 | KIAA0664      | 0.0859     | 0.0000        | 0.0000        | 0.0000    |
| 5227 | 8025488 | ZNF177        | 0.0000     | 0.0000        | 0.0000        | 0.0858    |
| 5228 | 7926609 | BMI1          | 0.0000     | 0.0000        | 0.0000        | -0.0858   |
| 5229 | 7990952 | LOC80154      | 0.0857     | 0.0000        | 0.0000        | -0.0328   |
| 5230 | 8040792 | EMILIN1       | 0.0000     | 0.0000        | 0.0000        | -0.0856   |
| 5231 | 7896409 | ---           | -0.0815    | 0.0000        | 0.0000        | 0.0855    |
| 5232 | 7896685 | ---           | 0.0855     | -0.0852       | 0.0000        | 0.0000    |
| 5233 | 7892764 | ---           | 0.0426     | -0.0854       | 0.0000        | 0.0000    |
| 5234 | 7930276 | SLK           | 0.0000     | -0.0854       | 0.0132        | 0.0197    |
| 5235 | 8095009 | DCUN1D4       | 0.0000     | 0.0000        | -0.0853       | 0.0000    |
| 5236 | 8167006 | RP2           | -0.0853    | 0.0000        | 0.0061        | 0.0106    |
| 5237 | 7901969 | ROR1          | 0.0000     | -0.0852       | 0.0000        | 0.0000    |
| 5238 | 7955646 | EIF4B         | 0.0852     | 0.0000        | 0.0000        | -0.0521   |
| 5239 | 7965515 | NDUFA12       | 0.0000     | 0.0785        | 0.0000        | -0.0851   |
| 5240 | 8171311 | ---           | 0.0850     | 0.0000        | 0.0000        | 0.0000    |
| 5241 | 7918437 | HBXIP         | 0.0000     | 0.0849        | 0.0000        | 0.0000    |
| 5242 | 7897441 | H6PD          | -0.0849    | 0.0000        | 0.0039        | 0.0755    |
| 5243 | 7985431 | LOC80154      | 0.0849     | 0.0000        | 0.0000        | -0.0277   |
| 5244 | 7963235 | CSRNP2        | 0.0000     | 0.0000        | 0.0000        | -0.0849   |
| 5245 | 7972805 | RAB20         | 0.0000     | 0.0000        | 0.0000        | 0.0848    |
| 5246 | 8097811 | DKFZP434I0714 | 0.0848     | 0.0000        | 0.0000        | 0.0000    |
| 5247 | 8005638 | ALDH3A2       | 0.0000     | 0.0000        | 0.0000        | 0.0848    |
| 5248 | 7925480 | FH            | 0.0847     | 0.0000        | 0.0000        | -0.0725   |
| 5249 | 7933010 | PARD3         | 0.0000     | 0.0000        | 0.0000        | 0.0847    |
| 5250 | 7902891 | ZNF326        | -0.0847    | 0.0000        | 0.0000        | 0.0000    |
| 5251 | 7893534 | ---           | 0.0847     | -0.0596       | 0.0000        | 0.0000    |
| 5252 | 7929116 | RPP30         | 0.0000     | 0.0000        | 0.0000        | -0.0847   |
| 5253 | 7894295 | ---           | 0.0000     | 0.0000        | 0.0000        | 0.0846    |
| 5254 | 7955076 | ---           | 0.0000     | 0.0000        | 0.0000        | -0.0846   |
| 5255 | 7958000 | CHPT1         | 0.0124     | 0.0000        | -0.0846       | 0.0000    |
| 5256 | 8165665 | ---           | 0.0000     | 0.0000        | 0.0000        | -0.0846   |
| 5257 | 7904506 | NBPF20        | 0.0000     | -0.0846       | 0.0000        | 0.0000    |
| 5258 | 8169792 | SH2D1A        | 0.0000     | 0.0000        | 0.0845        | 0.0000    |
| 5259 | 7984779 | PML           | 0.0000     | 0.0000        | 0.0844        | 0.0000    |
| 5260 | 7932554 | ARHGAP21      | 0.0000     | -0.0061       | -0.0405       | 0.0844    |
| 5261 | 7988212 | ELL3          | 0.0844     | 0.0000        | 0.0000        | 0.0000    |
| 5262 | 7917232 | GNG5          | -0.0842    | 0.0000        | 0.0000        | 0.0197    |
| 5263 | 8026122 | RAD23A        | 0.0000     | 0.0000        | 0.0000        | -0.0842   |
| 5264 | 8111666 | ---           | -0.0842    | 0.0000        | 0.0558        | 0.0000    |
| 5265 | 7945420 | RNH1          | 0.0000     | 0.0000        | 0.0000        | -0.0840   |
| 5266 | 7953395 | COPS7A        | 0.0000     | 0.0840        | 0.0000        | -0.0022   |
| 5267 | 8015432 | SC65          | 0.0840     | 0.0000        | 0.0000        | -0.0154   |
| 5268 | 8152759 | TATDN1        | 0.0000     | 0.0000        | 0.0000        | -0.0840   |

| #    | ID      | Name         | SDHB.score | SDHD-AT.score | SDHD-HN.score | VHL.score |
|------|---------|--------------|------------|---------------|---------------|-----------|
| 5269 | 8073470 | CTA-216E10.6 | 0.0285     | 0.0000        | 0.0000        | -0.0839   |
| 5270 | 8138930 | RP9P         | 0.0075     | 0.0000        | 0.0000        | -0.0839   |
| 5271 | 7899504 | GMEB1        | -0.0838    | 0.0000        | 0.0000        | 0.0000    |
| 5272 | 7991485 | TTC23        | -0.0183    | 0.0000        | 0.0838        | 0.0000    |
| 5273 | 8075657 | ---          | 0.0000     | 0.0000        | -0.0837       | 0.0000    |
| 5274 | 8119993 | HSP90AB1     | 0.0000     | 0.0000        | -0.0837       | 0.0000    |
| 5275 | 7943515 | ---          | 0.0000     | -0.0837       | 0.0000        | 0.0000    |
| 5276 | 7896671 | ---          | -0.0170    | 0.0000        | 0.0000        | 0.0836    |
| 5277 | 8026579 | TMEM38A      | 0.0000     | 0.0836        | 0.0000        | 0.0000    |
| 5278 | 7935910 | MGEA5        | 0.0000     | 0.0000        | 0.0000        | 0.0836    |
| 5279 | 7901418 | BTF3L4       | -0.0075    | 0.0836        | 0.0000        | 0.0000    |
| 5280 | 8052940 | PAIP2B       | 0.0000     | 0.0489        | -0.0835       | 0.0000    |
| 5281 | 8013771 | TLCD1        | 0.0833     | 0.0000        | 0.0000        | 0.0000    |
| 5282 | 8123651 | TUBB2B       | 0.0000     | -0.0140       | 0.0000        | 0.0833    |
| 5283 | 7980044 | PNMA1        | 0.0404     | 0.0000        | 0.0000        | -0.0833   |
| 5284 | 8169640 | SLC25A5      | 0.0000     | 0.0155        | 0.0000        | -0.0832   |
| 5285 | 8145611 | FZD3         | -0.0519    | 0.0000        | 0.0832        | 0.0000    |
| 5286 | 8083594 | PTX3         | -0.0139    | 0.0000        | 0.0000        | 0.0832    |
| 5287 | 7956261 | RBMS2        | -0.0719    | 0.0000        | 0.0830        | 0.0000    |
| 5288 | 8144982 | NPM2         | 0.0000     | 0.0000        | -0.0828       | 0.0000    |
| 5289 | 8102720 | ANKRD50      | 0.0000     | -0.0701       | 0.0828        | 0.0000    |
| 5290 | 7935968 | LDB1         | 0.0828     | 0.0000        | 0.0000        | -0.0112   |
| 5291 | 8140468 | PION         | 0.0828     | 0.0000        | 0.0000        | -0.0249   |
| 5292 | 7948894 | RNU2-1       | -0.0827    | 0.0514        | 0.0000        | 0.0000    |
| 5293 | 7894861 | ---          | 0.0000     | 0.0000        | 0.0000        | 0.0827    |
| 5294 | 7931810 | KLF6         | -0.0827    | 0.0000        | 0.0000        | 0.0719    |
| 5295 | 7943715 | ZC3H12C      | 0.0000     | 0.0000        | 0.0000        | 0.0827    |
| 5296 | 7916926 | ---          | 0.0000     | 0.0824        | 0.0000        | 0.0000    |
| 5297 | 7973985 | MIPOL1       | 0.0000     | 0.0000        | 0.0000        | -0.0824   |
| 5298 | 8105987 | ---          | -0.0824    | 0.0000        | 0.0000        | 0.0000    |
| 5299 | 8088348 | FAM116A      | 0.0000     | 0.0000        | 0.0823        | 0.0000    |
| 5300 | 7990987 | AP3B2        | 0.0822     | 0.0000        | -0.0418       | -0.0201   |
| 5301 | 8032608 | C19orf28     | 0.0000     | 0.0821        | 0.0000        | 0.0000    |
| 5302 | 8138459 | TMEM196      | 0.0000     | 0.0649        | 0.0821        | 0.0000    |
| 5303 | 8026780 | PGLS         | 0.0000     | 0.0820        | 0.0000        | 0.0000    |
| 5304 | 8116070 | PDLIM7       | 0.0000     | 0.0000        | 0.0820        | 0.0000    |
| 5305 | 8132369 | EPDR1        | 0.0000     | 0.0490        | 0.0000        | -0.0820   |
| 5306 | 8005574 | ---          | 0.0000     | -0.0819       | 0.0000        | 0.0377    |
| 5307 | 7895963 | ---          | 0.0000     | 0.0000        | 0.0000        | -0.0819   |
| 5308 | 8164580 | PTGES        | 0.0000     | 0.0000        | -0.0142       | 0.0819    |
| 5309 | 8133345 | WBSCR22      | 0.0000     | 0.0000        | -0.0819       | 0.0000    |
| 5310 | 7984562 | RPLP1        | 0.0000     | 0.0000        | 0.0000        | -0.0818   |
| 5311 | 7895604 | ---          | 0.0000     | 0.0000        | 0.0000        | -0.0818   |
| 5312 | 7960464 | VWF          | -0.0817    | 0.0000        | 0.0000        | 0.0117    |
| 5313 | 8076077 | DDX17        | 0.0000     | 0.0000        | 0.0000        | 0.0817    |
| 5314 | 8043187 | MAT2A        | 0.0000     | 0.0000        | -0.0817       | 0.0288    |
| 5315 | 8078066 | FGD5         | 0.0000     | -0.0816       | 0.0302        | 0.0000    |
| 5316 | 7956759 | SRGAP1       | 0.0000     | 0.0000        | -0.0816       | 0.0000    |
| 5317 | 8037535 | ---          | 0.0000     | 0.0816        | 0.0000        | 0.0000    |
| 5318 | 8137798 | PSMG3        | 0.0000     | 0.0815        | 0.0000        | -0.0090   |
| 5319 | 7964145 | TIMELESS     | 0.0815     | 0.0000        | 0.0000        | 0.0000    |
| 5320 | 7938295 | RPL27A       | 0.0000     | 0.0000        | 0.0815        | 0.0000    |
| 5321 | 7928444 | VCL          | 0.0000     | 0.0000        | 0.0815        | 0.0000    |
| 5322 | 7895780 | ---          | 0.0000     | 0.0000        | 0.0000        | -0.0814   |
| 5323 | 7908993 | SOX13        | -0.0814    | 0.0000        | 0.0000        | 0.0214    |
| 5324 | 8018600 | SRP68        | 0.0814     | 0.0000        | -0.0063       | -0.0514   |
| 5325 | 7963064 | MCRS1        | 0.0000     | 0.0000        | 0.0000        | -0.0813   |
| 5326 | 8128837 | C6orf186     | 0.0000     | 0.0000        | 0.0000        | 0.0813    |
| 5327 | 8165630 | C9orf37      | 0.0115     | 0.0000        | 0.0000        | -0.0813   |
| 5328 | 7923965 | ---          | 0.0000     | -0.0812       | 0.0331        | 0.0000    |
| 5329 | 8033780 | ZNF426       | 0.0000     | 0.0811        | 0.0000        | 0.0000    |
| 5330 | 7994237 | LCMT1        | 0.0000     | 0.0751        | 0.0000        | -0.0811   |

| #    | ID      | Name         | SDHB.score | SDHD-AT.score | SDHD-HN.score | VHL.score |
|------|---------|--------------|------------|---------------|---------------|-----------|
| 5331 | 7899813 | RBBP4        | -0.0810    | 0.0000        | 0.0000        | 0.0000    |
| 5332 | 7896647 | ---          | 0.0809     | -0.0599       | 0.0000        | 0.0000    |
| 5333 | 8075585 | C22orf28     | 0.0000     | 0.0809        | 0.0000        | -0.0370   |
| 5334 | 7912012 | ACOT7        | 0.0000     | 0.0809        | 0.0000        | 0.0000    |
| 5335 | 7966356 | HVCN1        | -0.0807    | 0.0000        | 0.0635        | 0.0000    |
| 5336 | 7895758 | ---          | 0.0807     | -0.0370       | 0.0000        | 0.0000    |
| 5337 | 7965322 | KITLG        | -0.0719    | 0.0000        | 0.0807        | 0.0189    |
| 5338 | 8013741 | SDF2         | 0.0000     | 0.0806        | 0.0000        | -0.0216   |
| 5339 | 8119423 | LOC221442    | -0.0737    | 0.0000        | 0.0000        | 0.0805    |
| 5340 | 7892884 | ---          | 0.0737     | -0.0805       | 0.0000        | 0.0000    |
| 5341 | 7972336 | DZIP1        | 0.0000     | 0.0805        | 0.0000        | -0.0170   |
| 5342 | 7922598 | ANGPTL1      | -0.0660    | 0.0000        | 0.0000        | 0.0803    |
| 5343 | 7896711 | ---          | 0.0000     | -0.0803       | 0.0000        | 0.0218    |
| 5344 | 8036707 | LRFN1        | 0.0803     | 0.0000        | 0.0000        | 0.0000    |
| 5345 | 8167965 | MSN          | -0.0742    | 0.0000        | 0.0801        | 0.0067    |
| 5346 | 8156610 | HABP4        | 0.0000     | 0.0000        | 0.0000        | -0.0801   |
| 5347 | 8141363 | TRIM4        | 0.0604     | 0.0000        | -0.0800       | 0.0000    |
| 5348 | 7972062 | FBXL3        | -0.0800    | 0.0000        | 0.0121        | 0.0000    |
| 5349 | 7914194 | DNAJC8       | -0.0800    | 0.0000        | 0.0000        | 0.0000    |
| 5350 | 7961900 | ITPR2        | 0.0000     | -0.0177       | 0.0800        | 0.0000    |
| 5351 | 7965652 | PCTK2        | -0.0799    | 0.0000        | 0.0000        | 0.0000    |
| 5352 | 8149399 | LONRF1       | 0.0000     | 0.0000        | 0.0000        | 0.0799    |
| 5353 | 7923635 | PLEKHA6      | 0.0799     | 0.0000        | 0.0000        | -0.0268   |
| 5354 | 7968653 | RFXAP        | 0.0000     | 0.0799        | 0.0000        | 0.0000    |
| 5355 | 7980219 | RPS6KL1      | 0.0000     | 0.0000        | 0.0000        | -0.0799   |
| 5356 | 7942553 | SPCS2        | 0.0798     | 0.0000        | 0.0000        | 0.0000    |
| 5357 | 8173600 | NAP1L2       | 0.0000     | 0.0798        | 0.0000        | -0.0442   |
| 5358 | 8020668 | IMPACT       | 0.0000     | 0.0000        | -0.0798       | 0.0000    |
| 5359 | 8084947 | FBXO45       | 0.0000     | 0.0000        | 0.0000        | -0.0797   |
| 5360 | 8075542 | C22orf30     | 0.0000     | 0.0000        | 0.0000        | 0.0796    |
| 5361 | 8121613 | RWDD1        | 0.0000     | 0.0000        | 0.0000        | -0.0796   |
| 5362 | 8138370 | ANKMY2       | 0.0000     | 0.0795        | 0.0000        | -0.0638   |
| 5363 | 8133690 | MDH2         | 0.0000     | 0.0000        | 0.0000        | -0.0794   |
| 5364 | 8029884 | SAE1         | 0.0538     | 0.0000        | 0.0000        | -0.0794   |
| 5365 | 8147746 | ---          | 0.0000     | 0.0794        | 0.0000        | 0.0000    |
| 5366 | 7927425 | WDFY4        | 0.0000     | 0.0000        | 0.0792        | 0.0000    |
| 5367 | 7952986 | HSN2         | 0.0450     | 0.0000        | 0.0000        | -0.0792   |
| 5368 | 8048551 | SPEG         | 0.0791     | 0.0000        | 0.0000        | 0.0000    |
| 5369 | 7994052 | HS3ST2       | 0.0000     | 0.0000        | 0.0000        | -0.0791   |
| 5370 | 8022418 | ---          | 0.0000     | 0.0388        | 0.0000        | -0.0790   |
| 5371 | 7948534 | DDB1         | 0.0790     | 0.0000        | -0.0497       | 0.0000    |
| 5372 | 8121712 | SLC35F1      | -0.0558    | 0.0000        | 0.0789        | 0.0000    |
| 5373 | 7948058 | FOLH1        | -0.0788    | 0.0000        | 0.0311        | 0.0600    |
| 5374 | 8136177 | LOC100287552 | 0.0000     | 0.0000        | -0.0787       | 0.0000    |
| 5375 | 8027556 | LRP3         | 0.0000     | 0.0000        | 0.0000        | -0.0787   |
| 5376 | 7951873 | QSK          | 0.0786     | -0.0289       | 0.0000        | 0.0000    |
| 5377 | 7955635 | ---          | 0.0000     | 0.0786        | 0.0000        | 0.0000    |
| 5378 | 7996185 | MMP15        | 0.0184     | 0.0102        | 0.0000        | -0.0785   |
| 5379 | 7988859 | GNB5         | 0.0785     | 0.0000        | -0.0675       | -0.0175   |
| 5380 | 8021453 | SEC11C       | 0.0513     | 0.0785        | -0.0689       | -0.0613   |
| 5381 | 7926170 | DHTKD1       | 0.0785     | 0.0000        | 0.0000        | -0.0095   |
| 5382 | 7915567 | ERI3         | -0.0785    | 0.0000        | 0.0000        | 0.0000    |
| 5383 | 8051547 | PRKD3        | -0.0372    | 0.0000        | 0.0785        | 0.0000    |
| 5384 | 8124459 | ZNF322A      | 0.0000     | 0.0000        | 0.0000        | -0.0785   |
| 5385 | 8044813 | TMEM37       | -0.0081    | 0.0000        | 0.0784        | 0.0000    |
| 5386 | 8099073 | LRPAP1       | 0.0000     | 0.0000        | -0.0784       | 0.0000    |
| 5387 | 7993825 | RUNDC2B      | 0.0000     | -0.0784       | 0.0000        | 0.0423    |
| 5388 | 7941087 | PPP2R5B      | 0.0000     | -0.0784       | 0.0000        | 0.0282    |
| 5389 | 7972069 | MYCBP2       | 0.0000     | 0.0000        | 0.0784        | 0.0000    |
| 5390 | 8086141 | EPM2AIP1     | 0.0383     | 0.0000        | 0.0000        | -0.0784   |
| 5391 | 8031871 | ZNF274       | 0.0782     | 0.0000        | 0.0000        | -0.0384   |
| 5392 | 7923889 | LGTN         | 0.0000     | 0.0781        | 0.0000        | 0.0000    |

| #    | ID      | Name      | SDHB.score | SDHD-AT.score | SDHD-HN.score | VHL.score |
|------|---------|-----------|------------|---------------|---------------|-----------|
| 5393 | 8171823 | APOO      | 0.0000     | 0.0440        | -0.0781       | 0.0000    |
| 5394 | 7895036 | ---       | 0.0000     | 0.0000        | 0.0000        | -0.0780   |
| 5395 | 8011112 | ---       | -0.0027    | 0.0000        | 0.0000        | 0.0780    |
| 5396 | 8004255 | BCL6B     | -0.0780    | 0.0000        | 0.0275        | 0.0024    |
| 5397 | 7984922 | MPI       | 0.0000     | 0.0000        | -0.0780       | 0.0000    |
| 5398 | 7923516 | CYB5R1    | 0.0319     | 0.0000        | -0.0778       | 0.0000    |
| 5399 | 8171435 | PIR       | 0.0000     | 0.0000        | 0.0000        | -0.0778   |
| 5400 | 7996761 | PLA2G15   | 0.0000     | 0.0000        | 0.0000        | -0.0778   |
| 5401 | 7893883 | ---       | 0.0521     | 0.0000        | 0.0000        | -0.0778   |
| 5402 | 7894435 | ---       | 0.0777     | 0.0000        | 0.0000        | 0.0000    |
| 5403 | 7950743 | RAB30     | 0.0776     | 0.0000        | -0.0539       | 0.0000    |
| 5404 | 7895676 | ---       | 0.0197     | -0.0775       | 0.0000        | 0.0000    |
| 5405 | 7922108 | GPR161    | 0.0000     | 0.0000        | 0.0775        | 0.0000    |
| 5406 | 7949383 | SYVN1     | 0.0774     | 0.0000        | 0.0000        | 0.0000    |
| 5407 | 7985690 | LOC440300 | 0.0774     | 0.0000        | 0.0000        | -0.0214   |
| 5408 | 7984743 | CD276     | 0.0025     | 0.0000        | 0.0000        | -0.0773   |
| 5409 | 8173430 | SNX12     | 0.0000     | 0.0000        | 0.0000        | -0.0771   |
| 5410 | 7923489 | KLHL12    | 0.0000     | 0.0000        | 0.0000        | -0.0770   |
| 5411 | 8133145 | CRCP      | 0.0273     | 0.0000        | -0.0770       | 0.0000    |
| 5412 | 8071119 | BCL2L13   | 0.0000     | 0.0769        | 0.0000        | 0.0000    |
| 5413 | 7948192 | SSRP1     | 0.0769     | 0.0000        | 0.0000        | 0.0000    |
| 5414 | 8079189 | ZNF167    | 0.0000     | 0.0000        | -0.0769       | 0.0000    |
| 5415 | 8101971 | PPP3CA    | 0.0000     | 0.0000        | 0.0000        | -0.0768   |
| 5416 | 7910022 | CNIH3     | 0.0000     | 0.0763        | 0.0000        | -0.0767   |
| 5417 | 8160151 | ZDHHC21   | 0.0062     | 0.0000        | -0.0767       | 0.0000    |
| 5418 | 7945829 | ---       | 0.0371     | -0.0766       | 0.0000        | 0.0000    |
| 5419 | 8082100 | PARP14    | 0.0000     | 0.0000        | 0.0765        | 0.0000    |
| 5420 | 7949808 | PITPNM1   | 0.0765     | 0.0000        | -0.0654       | 0.0000    |
| 5421 | 7949603 | BRMS1     | 0.0247     | 0.0000        | 0.0000        | -0.0765   |
| 5422 | 7941685 | CCS       | 0.0764     | 0.0000        | 0.0000        | 0.0000    |
| 5423 | 8073345 | EP300     | 0.0000     | 0.0000        | 0.0000        | 0.0763    |
| 5424 | 8049317 | DGKD      | 0.0000     | -0.0262       | 0.0000        | 0.0763    |
| 5425 | 8005267 | RAI1      | 0.0727     | -0.0317       | -0.0763       | 0.0000    |
| 5426 | 8142343 | ---       | -0.0116    | 0.0000        | 0.0000        | 0.0763    |
| 5427 | 7904562 | NBPF14    | 0.0000     | -0.0762       | 0.0000        | 0.0000    |
| 5428 | 7903878 | RBM15     | -0.0762    | 0.0000        | 0.0000        | 0.0000    |
| 5429 | 8102875 | ---       | 0.0000     | 0.0425        | 0.0000        | -0.0762   |
| 5430 | 7979505 | SIX1      | 0.0645     | 0.0000        | 0.0000        | -0.0761   |
| 5431 | 8170882 | ATP6AP1   | 0.0496     | 0.0197        | -0.0761       | -0.0274   |
| 5432 | 8063177 | SLC2A10   | 0.0000     | 0.0000        | 0.0000        | 0.0761    |
| 5433 | 8029465 | BCL3      | 0.0000     | 0.0000        | 0.0761        | 0.0000    |
| 5434 | 8180274 | ---       | 0.0761     | 0.0000        | -0.0101       | 0.0000    |
| 5435 | 8061706 | POFUT1    | 0.0760     | 0.0000        | 0.0000        | -0.0551   |
| 5436 | 8093539 | WHSC1     | 0.0759     | 0.0000        | -0.0002       | 0.0000    |
| 5437 | 8103289 | PLRG1     | 0.0000     | 0.0000        | 0.0000        | -0.0759   |
| 5438 | 7987192 | SLC12A6   | 0.0000     | 0.0000        | 0.0759        | 0.0000    |
| 5439 | 7936011 | CUEDC2    | 0.0000     | 0.0000        | 0.0000        | -0.0758   |
| 5440 | 8018379 | CASKIN2   | -0.0757    | 0.0000        | 0.0000        | 0.0000    |
| 5441 | 8047248 | PLCL1     | -0.0342    | 0.0000        | 0.0754        | 0.0000    |
| 5442 | 8175844 | IDH3G     | 0.0000     | 0.0754        | 0.0000        | 0.0000    |
| 5443 | 7925773 | ZNF692    | 0.0335     | 0.0000        | -0.0754       | 0.0000    |
| 5444 | 8075886 | IL2RB     | 0.0000     | 0.0000        | 0.0753        | 0.0000    |
| 5445 | 7948476 | PRPF19    | 0.0753     | 0.0000        | 0.0000        | 0.0000    |
| 5446 | 8127502 | C6orf155  | -0.0753    | 0.0000        | 0.0320        | 0.0000    |
| 5447 | 8136811 | EPHB6     | 0.0593     | 0.0000        | 0.0000        | -0.0752   |
| 5448 | 7918552 | C1orf183  | 0.0000     | 0.0000        | 0.0751        | 0.0000    |
| 5449 | 8019802 | ---       | -0.0751    | 0.0000        | 0.0000        | 0.0696    |
| 5450 | 8074261 | BID       | 0.0000     | 0.0000        | 0.0751        | 0.0000    |
| 5451 | 8009443 | ARSG      | -0.0204    | 0.0000        | 0.0000        | 0.0750    |
| 5452 | 7900461 | ZNF684    | -0.0750    | 0.0000        | 0.0000        | 0.0000    |
| 5453 | 8106418 | CRHBP     | -0.0749    | 0.0000        | 0.0000        | 0.0000    |
| 5454 | 8133442 | LAT2      | 0.0000     | 0.0000        | 0.0749        | 0.0000    |



| #    | ID      | Name      | SDHB.score | SDHD-AT.score | SDHD-HN.score | VHL.score |
|------|---------|-----------|------------|---------------|---------------|-----------|
| 5455 | 7948995 | ATL3      | 0.0015     | -0.0749       | 0.0000        | 0.0000    |
| 5456 | 7894694 | ---       | 0.0000     | -0.0749       | 0.0000        | 0.0000    |
| 5457 | 8122136 | RPS12     | 0.0000     | 0.0098        | 0.0000        | -0.0749   |
| 5458 | 7942998 | FOLH1B    | -0.0749    | 0.0000        | 0.0336        | 0.0447    |
| 5459 | 8119627 | PPP2R5D   | 0.0000     | 0.0000        | 0.0000        | -0.0748   |
| 5460 | 8007312 | TUBG2     | 0.0748     | 0.0000        | -0.0356       | -0.0103   |
| 5461 | 8065637 | COMMD7    | 0.0000     | 0.0000        | 0.0000        | -0.0748   |
| 5462 | 8054664 | ZC3H8     | 0.0000     | 0.0004        | 0.0000        | -0.0748   |
| 5463 | 7906235 | PRCC      | 0.0748     | 0.0000        | 0.0000        | -0.0074   |
| 5464 | 7893813 | ---       | -0.0321    | 0.0000        | 0.0000        | 0.0748    |
| 5465 | 8130191 | RMND1     | 0.0000     | 0.0000        | 0.0000        | -0.0748   |
| 5466 | 8140707 | ---       | 0.0000     | 0.0466        | 0.0000        | -0.0747   |
| 5467 | 8001048 | SLC5A2    | 0.0159     | 0.0000        | 0.0000        | -0.0745   |
| 5468 | 8092348 | LAMP3     | 0.0000     | 0.0000        | 0.0310        | -0.0745   |
| 5469 | 7938878 | ---       | 0.0000     | -0.0744       | 0.0000        | 0.0000    |
| 5470 | 7899943 | ZMYM1     | -0.0744    | 0.0000        | 0.0000        | 0.0000    |
| 5471 | 8068280 | IFNGR2    | -0.0350    | 0.0000        | 0.0744        | 0.0000    |
| 5472 | 7951654 | FDXACB1   | 0.0743     | 0.0000        | 0.0000        | 0.0000    |
| 5473 | 8126486 | CUL7      | 0.0743     | 0.0000        | -0.0676       | 0.0000    |
| 5474 | 8081676 | GTPBP8    | 0.0000     | 0.0743        | 0.0000        | 0.0000    |
| 5475 | 7952549 | RPUSD4    | 0.0742     | 0.0000        | 0.0000        | 0.0000    |
| 5476 | 8052994 | RAB11FIP5 | 0.0006     | 0.0000        | 0.0000        | -0.0742   |
| 5477 | 7893071 | ---       | 0.0742     | 0.0000        | 0.0000        | 0.0000    |
| 5478 | 7939477 | ALKBH3    | 0.0000     | 0.0459        | 0.0000        | -0.0741   |
| 5479 | 8056766 | SLC25A12  | 0.0741     | 0.0000        | 0.0000        | -0.0502   |
| 5480 | 7893345 | ---       | 0.0000     | 0.0000        | -0.0740       | 0.0000    |
| 5481 | 7914245 | MECR      | -0.0007    | 0.0740        | 0.0000        | 0.0000    |
| 5482 | 8068375 | FAM165B   | 0.0000     | 0.0343        | 0.0000        | -0.0740   |
| 5483 | 7939383 | PRR5L     | 0.0000     | -0.0740       | 0.0409        | 0.0000    |
| 5484 | 7956166 | ESYT1     | -0.0438    | 0.0000        | 0.0740        | 0.0000    |
| 5485 | 8032525 | SLC39A3   | 0.0000     | 0.0000        | 0.0000        | -0.0740   |
| 5486 | 8169028 | NGFRAP1   | 0.0000     | 0.0740        | 0.0000        | 0.0000    |
| 5487 | 7951896 | PCSK7     | 0.0739     | -0.0695       | 0.0000        | 0.0000    |
| 5488 | 7935230 | ALDH18A1  | 0.0000     | 0.0000        | -0.0739       | 0.0000    |
| 5489 | 7912292 | LZIC      | -0.0739    | 0.0000        | 0.0170        | 0.0000    |
| 5490 | 8029856 | GRLF1     | 0.0094     | 0.0000        | 0.0000        | -0.0738   |
| 5491 | 8059275 | ---       | 0.0000     | 0.0738        | 0.0000        | 0.0000    |
| 5492 | 8042705 | SMYD5     | 0.0344     | 0.0000        | 0.0000        | -0.0738   |
| 5493 | 8155898 | PCSK5     | 0.0000     | 0.0000        | 0.0738        | 0.0000    |
| 5494 | 8117194 | MRS2      | 0.0000     | 0.0738        | 0.0000        | -0.0256   |
| 5495 | 7950990 | SLC36A4   | 0.0738     | 0.0000        | 0.0000        | 0.0000    |
| 5496 | 7941583 | RAB1B     | 0.0713     | 0.0000        | 0.0000        | -0.0737   |
| 5497 | 8059249 | OBSL1     | 0.0736     | 0.0000        | -0.0455       | 0.0000    |
| 5498 | 8158739 | LAMC3     | 0.0000     | 0.0000        | 0.0000        | 0.0736    |
| 5499 | 8171161 | ARSE      | -0.0630    | 0.0000        | 0.0000        | 0.0736    |
| 5500 | 7990400 | ULK3      | 0.0000     | 0.0000        | -0.0736       | 0.0000    |
| 5501 | 7896123 | ---       | 0.0000     | 0.0000        | 0.0000        | -0.0735   |
| 5502 | 7893989 | ---       | 0.0000     | -0.0735       | 0.0000        | 0.0259    |
| 5503 | 7933413 | BMS1P5    | 0.0000     | 0.0000        | 0.0000        | 0.0735    |
| 5504 | 8110522 | CANX      | 0.0278     | 0.0000        | -0.0734       | 0.0000    |
| 5505 | 8146403 | SNTG1     | -0.0733    | 0.0000        | 0.0000        | 0.0625    |
| 5506 | 7896219 | ---       | -0.0100    | 0.0000        | 0.0000        | 0.0733    |
| 5507 | 8084810 | ---       | -0.0382    | 0.0000        | 0.0733        | 0.0000    |
| 5508 | 7969017 | RB1       | 0.0000     | 0.0000        | 0.0731        | 0.0000    |
| 5509 | 8025500 | UBL5      | 0.0000     | 0.0731        | 0.0000        | 0.0000    |
| 5510 | 8037374 | PLAUR     | -0.0445    | 0.0000        | 0.0730        | 0.0000    |
| 5511 | 7984914 | CPLX3     | 0.0000     | 0.0000        | 0.0000        | 0.0729    |
| 5512 | 8180409 | ---       | 0.0000     | 0.0000        | 0.0000        | -0.0729   |
| 5513 | 8073135 | SMCR7L    | 0.0000     | 0.0000        | 0.0000        | -0.0728   |
| 5514 | 7901091 | TOE1      | -0.0728    | 0.0000        | 0.0000        | 0.0000    |
| 5515 | 8025895 | PRKCSH    | 0.0000     | 0.0000        | -0.0728       | 0.0000    |
| 5516 | 7987526 | C15orf57  | -0.0728    | 0.0000        | 0.0000        | 0.0536    |

| #    | ID      | Name       | SDHB.score | SDHD-AT.score | SDHD-HN.score | VHL.score |
|------|---------|------------|------------|---------------|---------------|-----------|
| 5517 | 7898750 | ZBTB40     | -0.0728    | 0.0000        | 0.0000        | 0.0271    |
| 5518 | 8020903 | GALNT1     | 0.0000     | -0.0727       | 0.0000        | 0.0000    |
| 5519 | 8139885 | ---        | 0.0229     | 0.0000        | 0.0000        | -0.0727   |
| 5520 | 8005501 | FAM18B2    | 0.0727     | 0.0000        | 0.0000        | 0.0000    |
| 5521 | 8076851 | ALG12      | 0.0000     | 0.0000        | 0.0000        | -0.0726   |
| 5522 | 8040415 | ---        | 0.0000     | 0.0397        | 0.0000        | -0.0725   |
| 5523 | 7941709 | RBM4       | 0.0725     | 0.0000        | 0.0000        | 0.0000    |
| 5524 | 7892600 | ---        | 0.0000     | 0.0000        | 0.0000        | -0.0725   |
| 5525 | 8004237 | RNASEK     | 0.0000     | 0.0000        | 0.0000        | -0.0725   |
| 5526 | 8164694 | ---        | -0.0236    | 0.0000        | 0.0000        | 0.0724    |
| 5527 | 8023450 | TXNL1      | 0.0000     | 0.0000        | 0.0000        | -0.0724   |
| 5528 | 7973530 | PCK2       | 0.0000     | 0.0000        | 0.0000        | -0.0723   |
| 5529 | 8129315 | ---        | 0.0000     | 0.0723        | 0.0000        | 0.0000    |
| 5530 | 8165258 | AGPAT2     | 0.0000     | 0.0000        | 0.0000        | 0.0723    |
| 5531 | 8094719 | N4BP2      | 0.0000     | 0.0000        | -0.0723       | 0.0000    |
| 5532 | 7953765 | RIMKLB     | 0.0000     | -0.0722       | 0.0000        | 0.0242    |
| 5533 | 7910651 | TBCE       | 0.0353     | 0.0000        | 0.0000        | -0.0722   |
| 5534 | 7901592 | C1orf83    | -0.0722    | 0.0000        | 0.0000        | 0.0000    |
| 5535 | 7895397 | ---        | 0.0000     | 0.0000        | -0.0722       | 0.0000    |
| 5536 | 8035803 | ZNF708     | -0.0722    | 0.0000        | 0.0000        | 0.0000    |
| 5537 | 8039672 | ---        | -0.0658    | 0.0000        | 0.0000        | 0.0721    |
| 5538 | 7932635 | ---        | -0.0721    | 0.0000        | 0.0000        | 0.0000    |
| 5539 | 8023646 | BCL2       | 0.0000     | 0.0000        | -0.0721       | 0.0000    |
| 5540 | 7963631 | RARG       | 0.0000     | 0.0000        | 0.0000        | -0.0719   |
| 5541 | 7948574 | CPSF7      | 0.0718     | 0.0000        | 0.0000        | 0.0000    |
| 5542 | 7926205 | ---        | 0.0718     | 0.0000        | 0.0000        | -0.0506   |
| 5543 | 8151909 | UQCRB      | 0.0718     | 0.0000        | -0.0367       | 0.0000    |
| 5544 | 7941822 | ANKRD13D   | 0.0717     | 0.0000        | 0.0000        | 0.0000    |
| 5545 | 8007420 | AOC3       | -0.0442    | 0.0000        | 0.0000        | 0.0717    |
| 5546 | 7940118 | ZFP91-CNTF | 0.0716     | -0.0440       | 0.0000        | 0.0000    |
| 5547 | 7895996 | ---        | -0.0715    | 0.0000        | 0.0000        | 0.0000    |
| 5548 | 8021222 | ELAC1      | 0.0000     | 0.0000        | 0.0000        | -0.0715   |
| 5549 | 8116577 | ---        | 0.0000     | -0.0715       | 0.0000        | 0.0000    |
| 5550 | 7896200 | ---        | -0.0715    | 0.0000        | 0.0000        | 0.0000    |
| 5551 | 8014248 | SLFN13     | 0.0000     | 0.0000        | 0.0715        | 0.0000    |
| 5552 | 7972367 | ---        | 0.0000     | 0.0000        | 0.0715        | 0.0000    |
| 5553 | 8108753 | PCDHB15    | 0.0000     | -0.0715       | 0.0000        | 0.0000    |
| 5554 | 7923837 | PM20D1     | 0.0000     | 0.0000        | 0.0000        | 0.0714    |
| 5555 | 7892954 | ---        | 0.0000     | 0.0000        | 0.0000        | -0.0714   |
| 5556 | 8034299 | ELOF1      | 0.0000     | 0.0714        | 0.0000        | -0.0708   |
| 5557 | 8139947 | NSUN5C     | 0.0714     | 0.0000        | 0.0000        | 0.0000    |
| 5558 | 8153201 | EIF2C2     | 0.0000     | 0.0000        | -0.0714       | 0.0000    |
| 5559 | 8116177 | AGXT2L2    | -0.0713    | 0.0000        | 0.0000        | 0.0308    |
| 5560 | 8128013 | RARS2      | -0.0713    | 0.0000        | 0.0097        | 0.0000    |
| 5561 | 7966213 | MMAB       | 0.0000     | 0.0000        | -0.0712       | 0.0000    |
| 5562 | 8074349 | DGCR2      | 0.0000     | 0.0000        | 0.0000        | -0.0712   |
| 5563 | 8056060 | BAZ2B      | 0.0000     | 0.0000        | 0.0000        | 0.0712    |
| 5564 | 7979551 | PPP2R5E    | 0.0711     | 0.0000        | 0.0000        | -0.0365   |
| 5565 | 7910611 | KCNK1      | 0.0711     | 0.0000        | 0.0000        | -0.0317   |
| 5566 | 7991714 | ---        | 0.0711     | 0.0000        | 0.0000        | -0.0119   |
| 5567 | 7898570 | ---        | 0.0000     | 0.0711        | 0.0000        | -0.0078   |
| 5568 | 7913883 | PAFAH2     | -0.0710    | 0.0000        | 0.0000        | 0.0260    |
| 5569 | 7892980 | ---        | 0.0709     | 0.0000        | 0.0000        | -0.0659   |
| 5570 | 7895529 | ---        | -0.0708    | 0.0000        | 0.0367        | 0.0000    |
| 5571 | 7893330 | ---        | 0.0000     | 0.0000        | 0.0000        | 0.0708    |
| 5572 | 8064591 | ProSAPiP1  | 0.0184     | 0.0000        | 0.0000        | -0.0708   |
| 5573 | 8063427 | MOCS3      | 0.0000     | 0.0000        | 0.0000        | -0.0707   |
| 5574 | 8025368 | SNAPC2     | 0.0000     | 0.0000        | 0.0000        | -0.0707   |
| 5575 | 8114778 | GCSH       | 0.0000     | 0.0524        | 0.0000        | -0.0707   |
| 5576 | 8078138 | EAF1       | 0.0000     | 0.0000        | 0.0000        | -0.0706   |
| 5577 | 7910494 | ARV1       | 0.0000     | 0.0706        | 0.0000        | -0.0306   |
| 5578 | 7896004 | ---        | 0.0000     | -0.0706       | 0.0000        | 0.0247    |

| #    | ID      | Name      | SDHB.score | SDHD-AT.score | SDHD-HN.score | VHL.score |
|------|---------|-----------|------------|---------------|---------------|-----------|
| 5579 | 8015900 | TMEM101   | 0.0000     | 0.0420        | 0.0000        | -0.0706   |
| 5580 | 8170479 | VMA21     | 0.0605     | 0.0072        | -0.0211       | -0.0706   |
| 5581 | 8001946 | KIAA0895L | 0.0000     | 0.0000        | -0.0705       | 0.0160    |
| 5582 | 7909661 | RPS6KC1   | 0.0705     | 0.0000        | 0.0000        | -0.0685   |
| 5583 | 7906742 | PCP4L1    | 0.0000     | -0.0705       | 0.0000        | 0.0380    |
| 5584 | 7949948 | C11orf24  | 0.0000     | 0.0000        | 0.0000        | -0.0705   |
| 5585 | 8081740 | ATP6V1A   | 0.0000     | 0.0644        | 0.0000        | -0.0705   |
| 5586 | 8046520 | ---       | 0.0000     | 0.0705        | 0.0000        | 0.0000    |
| 5587 | 8173647 | ZDHHC15   | 0.0000     | 0.0705        | 0.0000        | 0.0000    |
| 5588 | 8116969 | NOL7      | 0.0000     | 0.0000        | 0.0000        | -0.0704   |
| 5589 | 7911444 | UBE2J2    | -0.0704    | 0.0000        | 0.0000        | 0.0000    |
| 5590 | 8121685 | DCBLD1    | -0.0703    | 0.0000        | 0.0438        | 0.0000    |
| 5591 | 7917156 | FUBP1     | -0.0363    | 0.0000        | 0.0000        | 0.0703    |
| 5592 | 8033813 | FBXL12    | 0.0000     | 0.0000        | 0.0000        | -0.0703   |
| 5593 | 8165684 | ---       | 0.0000     | 0.0702        | 0.0000        | -0.0186   |
| 5594 | 8142930 | TSGA14    | 0.0000     | 0.0000        | -0.0701       | 0.0000    |
| 5595 | 8180407 | ---       | 0.0000     | 0.0000        | 0.0000        | -0.0701   |
| 5596 | 7964064 | CS        | 0.0228     | 0.0000        | 0.0000        | -0.0700   |
| 5597 | 7951660 | RPL37AP8  | 0.0000     | 0.0700        | 0.0000        | -0.0024   |
| 5598 | 7894041 | ---       | 0.0700     | 0.0000        | 0.0000        | 0.0000    |
| 5599 | 7895600 | ---       | 0.0154     | 0.0000        | 0.0000        | -0.0700   |
| 5600 | 7896330 | ---       | 0.0000     | -0.0699       | 0.0000        | 0.0362    |
| 5601 | 8101992 | SLC39A8   | -0.0314    | 0.0000        | 0.0699        | 0.0000    |
| 5602 | 8025035 | ALKBH7    | 0.0000     | 0.0000        | 0.0000        | -0.0699   |
| 5603 | 7995492 | ADCY7     | 0.0000     | 0.0000        | 0.0699        | 0.0000    |
| 5604 | 8157976 | GARNL3    | 0.0419     | 0.0000        | -0.0698       | 0.0000    |
| 5605 | 8009995 | UNK       | 0.0697     | 0.0000        | 0.0000        | -0.0550   |
| 5606 | 8082003 | EAF2      | 0.0000     | 0.0000        | 0.0697        | 0.0000    |
| 5607 | 8075616 | SYN3      | 0.0697     | 0.0000        | 0.0000        | 0.0000    |
| 5608 | 7985571 | LOC80154  | 0.0697     | 0.0000        | 0.0000        | -0.0075   |
| 5609 | 8077688 | IL17RC    | 0.0000     | 0.0696        | 0.0000        | 0.0000    |
| 5610 | 7990810 | MTHFS     | 0.0696     | 0.0000        | -0.0226       | 0.0000    |
| 5611 | 7991401 | HDDC3     | 0.0000     | 0.0116        | 0.0000        | -0.0695   |
| 5612 | 8042259 | MDH1      | 0.0000     | 0.0695        | 0.0000        | -0.0328   |
| 5613 | 8164428 | TRUB2     | 0.0000     | 0.0218        | 0.0000        | -0.0695   |
| 5614 | 7998157 | C16orf35  | 0.0498     | 0.0000        | 0.0000        | -0.0694   |
| 5615 | 7960594 | CHD4      | 0.0693     | 0.0000        | 0.0000        | 0.0000    |
| 5616 | 8087874 | WDR82     | 0.0000     | 0.0000        | 0.0000        | -0.0692   |
| 5617 | 8103922 | CASP3     | 0.0000     | -0.0692       | 0.0000        | 0.0000    |
| 5618 | 8031933 | RPS5      | 0.0000     | 0.0691        | 0.0000        | 0.0000    |
| 5619 | 8099570 | DCAF16    | 0.0000     | 0.0000        | 0.0000        | -0.0691   |
| 5620 | 7979437 | C14orf149 | 0.0000     | 0.0000        | 0.0000        | 0.0691    |
| 5621 | 8139244 | C7orf44   | 0.0000     | 0.0690        | 0.0000        | -0.0526   |
| 5622 | 7950641 | KCTD14    | 0.0689     | 0.0000        | 0.0000        | -0.0096   |
| 5623 | 7992414 | TBL3      | 0.0000     | 0.0000        | 0.0000        | -0.0687   |
| 5624 | 8052934 | MCEE      | 0.0000     | 0.0687        | 0.0000        | 0.0000    |
| 5625 | 8035050 | RASAL3    | 0.0000     | 0.0000        | 0.0686        | 0.0000    |
| 5626 | 7948829 | ZBTB3     | 0.0686     | 0.0000        | 0.0000        | -0.0046   |
| 5627 | 7895918 | ---       | 0.0000     | 0.0000        | 0.0000        | -0.0686   |
| 5628 | 7954436 | LRMP      | -0.0685    | 0.0000        | 0.0532        | 0.0000    |
| 5629 | 7895625 | ---       | -0.0685    | 0.0000        | 0.0000        | 0.0000    |
| 5630 | 8164644 | FAM78A    | 0.0000     | 0.0000        | 0.0685        | 0.0000    |
| 5631 | 8140971 | SAMD9L    | -0.0631    | -0.0123       | 0.0685        | 0.0473    |
| 5632 | 7922823 | EDEM3     | 0.0000     | 0.0000        | -0.0684       | 0.0538    |
| 5633 | 8177478 | RAD17     | 0.0000     | 0.0000        | 0.0000        | -0.0684   |
| 5634 | 7893058 | ---       | 0.0000     | 0.0683        | 0.0000        | 0.0000    |
| 5635 | 8163714 | ---       | 0.0000     | 0.0682        | 0.0000        | 0.0000    |
| 5636 | 7928838 | LDB3      | -0.0039    | 0.0000        | 0.0000        | 0.0682    |
| 5637 | 8112582 | ---       | 0.0301     | 0.0000        | 0.0000        | -0.0682   |
| 5638 | 7987163 | FMN1      | 0.0000     | -0.0536       | 0.0000        | 0.0681    |
| 5639 | 7928300 | C10orf104 | 0.0000     | 0.0000        | 0.0000        | -0.0681   |
| 5640 | 8166784 | TSPAN7    | 0.0000     | 0.0000        | 0.0000        | 0.0681    |

| #    | ID      | Name      | SDHB.score | SDHD-AT.score | SDHD-HN.score | VHL.score |
|------|---------|-----------|------------|---------------|---------------|-----------|
| 5641 | 7935270 | BLNK      | 0.0000     | 0.0000        | 0.0680        | 0.0000    |
| 5642 | 8078260 | ---       | 0.0000     | -0.0584       | 0.0679        | 0.0000    |
| 5643 | 8016033 | FAM171A2  | 0.0043     | 0.0576        | 0.0000        | -0.0679   |
| 5644 | 8139592 | HUS1      | 0.0000     | 0.0629        | -0.0678       | 0.0000    |
| 5645 | 8078603 | ---       | 0.0000     | 0.0000        | 0.0678        | -0.0041   |
| 5646 | 8143697 | ZNF786    | 0.0678     | 0.0000        | 0.0000        | -0.0634   |
| 5647 | 8102212 | ---       | -0.0678    | 0.0000        | 0.0000        | 0.0000    |
| 5648 | 8009164 | DCAF7     | 0.0000     | 0.0000        | 0.0000        | -0.0678   |
| 5649 | 8053009 | FBXO41    | 0.0101     | 0.0000        | -0.0678       | 0.0000    |
| 5650 | 7976243 | CPSF2     | 0.0000     | 0.0000        | 0.0000        | -0.0677   |
| 5651 | 8016239 | PLEKHM1   | 0.0000     | 0.0000        | 0.0000        | -0.0677   |
| 5652 | 8065280 | C20orf74  | -0.0676    | 0.0000        | 0.0251        | 0.0454    |
| 5653 | 8023133 | PIAS2     | 0.0000     | 0.0000        | -0.0675       | 0.0429    |
| 5654 | 8167749 | FAM156A   | 0.0000     | 0.0000        | -0.0189       | 0.0675    |
| 5655 | 8164665 | RAPGEF1   | 0.0000     | -0.0675       | 0.0518        | 0.0000    |
| 5656 | 8128865 | ---       | 0.0000     | 0.0673        | 0.0000        | -0.0142   |
| 5657 | 8131831 | NUPL2     | 0.0000     | 0.0673        | 0.0000        | 0.0000    |
| 5658 | 7896673 | ---       | 0.0000     | -0.0672       | 0.0000        | 0.0000    |
| 5659 | 8180364 | ---       | 0.0000     | 0.0000        | -0.0672       | 0.0000    |
| 5660 | 7909529 | RCOR3     | 0.0524     | 0.0000        | -0.0670       | 0.0000    |
| 5661 | 8055239 | CFC1      | 0.0000     | 0.0000        | 0.0000        | -0.0670   |
| 5662 | 8091352 | UBQLN4    | 0.0000     | 0.0495        | 0.0000        | -0.0670   |
| 5663 | 8134091 | CLDN12    | 0.0670     | 0.0000        | -0.0255       | -0.0579   |
| 5664 | 7894489 | ---       | 0.0670     | 0.0000        | -0.0303       | 0.0000    |
| 5665 | 8100382 | CHIC2     | -0.0669    | 0.0000        | 0.0527        | 0.0000    |
| 5666 | 8109438 | LARP1     | 0.0669     | 0.0000        | -0.0418       | 0.0000    |
| 5667 | 8077944 | CAND2     | 0.0000     | 0.0000        | 0.0000        | -0.0668   |
| 5668 | 8152280 | LRP12     | 0.0413     | 0.0000        | 0.0000        | -0.0667   |
| 5669 | 7951046 | MRE11A    | 0.0000     | -0.0667       | 0.0000        | 0.0013    |
| 5670 | 8115346 | ATOX1     | 0.0000     | 0.0667        | 0.0000        | 0.0000    |
| 5671 | 8121112 | ---       | 0.0000     | 0.0000        | 0.0000        | -0.0666   |
| 5672 | 7892846 | ---       | 0.0000     | 0.0000        | 0.0666        | 0.0000    |
| 5673 | 8045846 | ---       | -0.0666    | 0.0000        | 0.0000        | 0.0431    |
| 5674 | 8083000 | FAIM      | 0.0000     | 0.0000        | 0.0288        | -0.0665   |
| 5675 | 8159977 | RLN2      | 0.0665     | 0.0000        | 0.0000        | 0.0000    |
| 5676 | 8109201 | HMGXB3    | 0.0665     | 0.0000        | 0.0000        | 0.0000    |
| 5677 | 8000329 | PALB2     | 0.0000     | 0.0000        | 0.0000        | -0.0665   |
| 5678 | 8029642 | MARK4     | 0.0000     | 0.0664        | 0.0000        | 0.0000    |
| 5679 | 7945377 | SIGIRR    | 0.0000     | 0.0000        | 0.0664        | 0.0000    |
| 5680 | 7969096 | CDADC1    | -0.0663    | 0.0000        | 0.0000        | 0.0000    |
| 5681 | 8058462 | MDH1B     | 0.0000     | 0.0000        | 0.0000        | 0.0663    |
| 5682 | 8166498 | ---       | 0.0000     | 0.0663        | 0.0000        | 0.0000    |
| 5683 | 8068180 | HUNK      | 0.0270     | 0.0000        | 0.0000        | -0.0663   |
| 5684 | 7956211 | MYL6      | -0.0662    | 0.0000        | 0.0179        | 0.0000    |
| 5685 | 8039645 | ZNF772    | 0.0530     | 0.0000        | -0.0662       | 0.0000    |
| 5686 | 8053975 | LMAN2L    | 0.0000     | 0.0502        | 0.0000        | -0.0661   |
| 5687 | 7993999 | SMG1      | 0.0000     | -0.0661       | 0.0000        | 0.0000    |
| 5688 | 7912040 | TNFRSF25  | 0.0000     | 0.0000        | 0.0000        | 0.0660    |
| 5689 | 7976876 | DYNC1H1   | 0.0659     | 0.0000        | 0.0000        | 0.0000    |
| 5690 | 7933634 | ---       | 0.0000     | 0.0000        | 0.0000        | 0.0658    |
| 5691 | 7920422 | RAB13     | 0.0000     | 0.0000        | 0.0657        | 0.0000    |
| 5692 | 7904314 | TTF2      | -0.0656    | 0.0000        | 0.0000        | 0.0039    |
| 5693 | 8071061 | psiTPTE22 | -0.0655    | 0.0000        | 0.0000        | 0.0000    |
| 5694 | 8000834 | SMG1      | 0.0000     | -0.0654       | 0.0000        | 0.0000    |
| 5695 | 8060353 | RBCK1     | 0.0057     | 0.0000        | 0.0000        | -0.0654   |
| 5696 | 8064322 | C20orf96  | 0.0653     | 0.0000        | 0.0000        | -0.0088   |
| 5697 | 7894471 | ---       | 0.0000     | 0.0000        | 0.0653        | -0.0218   |
| 5698 | 8125818 | C6orf1    | 0.0000     | 0.0000        | 0.0000        | -0.0653   |
| 5699 | 7991104 | ---       | 0.0464     | 0.0000        | 0.0000        | -0.0651   |
| 5700 | 8006123 | CPD       | 0.0000     | 0.0000        | 0.0000        | -0.0651   |
| 5701 | 7951826 | BUD13     | 0.0650     | 0.0000        | 0.0000        | 0.0000    |
| 5702 | 8038326 | SLC6A16   | 0.0000     | -0.0650       | 0.0382        | 0.0000    |

| #    | ID      | Name         | SDHB.score | SDHD-AT.score | SDHD-HN.score | VHL.score |
|------|---------|--------------|------------|---------------|---------------|-----------|
| 5703 | 7969693 | RAP2A        | -0.0649    | 0.0000        | 0.0000        | 0.0000    |
| 5704 | 8065202 | C20orf12     | 0.0000     | 0.0000        | 0.0000        | 0.0649    |
| 5705 | 7894662 | ---          | 0.0648     | -0.0373       | 0.0000        | 0.0000    |
| 5706 | 8039961 | ACP1         | 0.0000     | 0.0000        | -0.0648       | 0.0000    |
| 5707 | 7920000 | POGZ         | 0.0000     | 0.0000        | -0.0648       | 0.0000    |
| 5708 | 8122883 | ---          | 0.0000     | 0.0647        | 0.0000        | 0.0000    |
| 5709 | 8037322 | ETHE1        | 0.0000     | 0.0646        | 0.0000        | 0.0000    |
| 5710 | 7956097 | SUOX         | 0.0000     | 0.0000        | 0.0000        | -0.0646   |
| 5711 | 7895831 | ---          | -0.0646    | 0.0000        | 0.0000        | 0.0344    |
| 5712 | 8093166 | PIGZ         | 0.0000     | 0.0000        | 0.0000        | -0.0645   |
| 5713 | 7935588 | HPS1         | -0.0645    | 0.0000        | 0.0000        | 0.0000    |
| 5714 | 8085486 | XPC          | 0.0000     | 0.0000        | 0.0000        | -0.0645   |
| 5715 | 7946401 | ST5          | -0.0114    | 0.0000        | 0.0645        | 0.0000    |
| 5716 | 8138640 | CYCS         | 0.0000     | 0.0645        | 0.0000        | -0.0094   |
| 5717 | 7897632 | APITD1       | -0.0644    | 0.0000        | 0.0000        | 0.0000    |
| 5718 | 8116227 | CLK4         | -0.0643    | 0.0000        | 0.0000        | 0.0000    |
| 5719 | 7945740 | RPL26L1      | 0.0000     | 0.0000        | 0.0000        | -0.0643   |
| 5720 | 8140424 | SPDYE1       | 0.0000     | 0.0000        | -0.0642       | 0.0000    |
| 5721 | 8156167 | MAK10        | 0.0000     | 0.0000        | 0.0000        | 0.0642    |
| 5722 | 8152355 | GOLSYN       | 0.0000     | 0.0000        | -0.0641       | 0.0000    |
| 5723 | 8029907 | C5AR1        | -0.0641    | 0.0000        | 0.0327        | 0.0119    |
| 5724 | 7970907 | N4BP2L2      | 0.0000     | 0.0000        | 0.0000        | 0.0640    |
| 5725 | 8103005 | ANAPC10      | 0.0000     | 0.0000        | 0.0000        | -0.0640   |
| 5726 | 8065485 | NINL         | 0.0639     | 0.0000        | 0.0000        | 0.0000    |
| 5727 | 7892861 | ---          | 0.0000     | 0.0000        | 0.0000        | -0.0638   |
| 5728 | 8177601 | MCCC2        | 0.0591     | 0.0000        | -0.0638       | 0.0000    |
| 5729 | 8145365 | DOCK5        | 0.0000     | -0.0638       | 0.0254        | 0.0000    |
| 5730 | 8136039 | ATP6V1F      | 0.0047     | 0.0000        | 0.0000        | -0.0638   |
| 5731 | 7913256 | DDOST        | -0.0638    | 0.0405        | 0.0000        | 0.0033    |
| 5732 | 8032127 | C19orf22     | 0.0000     | 0.0000        | 0.0000        | -0.0638   |
| 5733 | 8047097 | GLS          | -0.0199    | 0.0000        | 0.0638        | 0.0000    |
| 5734 | 7985959 | C15orf58     | 0.0000     | 0.0000        | 0.0000        | -0.0637   |
| 5735 | 7974198 | PPIL5        | 0.0202     | 0.0000        | 0.0000        | -0.0637   |
| 5736 | 7892882 | ---          | 0.0000     | 0.0000        | -0.0637       | 0.0000    |
| 5737 | 8034482 | TNPO2        | 0.0000     | 0.0637        | 0.0000        | -0.0270   |
| 5738 | 8058477 | KLF7         | 0.0000     | -0.0637       | 0.0000        | 0.0174    |
| 5739 | 8057377 | CCDC141      | 0.0000     | 0.0000        | 0.0000        | 0.0637    |
| 5740 | 7945101 | DCPS         | 0.0636     | 0.0000        | 0.0000        | 0.0000    |
| 5741 | 8106107 | PTCD2        | 0.0000     | 0.0000        | 0.0000        | -0.0636   |
| 5742 | 8140478 | PION         | 0.0635     | 0.0000        | 0.0000        | 0.0000    |
| 5743 | 8043630 | UNQ5814      | -0.0635    | 0.0000        | 0.0000        | 0.0000    |
| 5744 | 8039577 | ZSCAN5A      | 0.0000     | 0.0000        | 0.0000        | -0.0634   |
| 5745 | 7929634 | ZDHHC16      | 0.0000     | 0.0000        | 0.0000        | -0.0633   |
| 5746 | 8150175 | C8orf41      | 0.0000     | 0.0000        | 0.0000        | -0.0633   |
| 5747 | 7895503 | ---          | 0.0297     | 0.0000        | -0.0633       | 0.0000    |
| 5748 | 7895665 | ---          | 0.0000     | 0.0000        | 0.0000        | 0.0632    |
| 5749 | 7993035 | UBN1         | 0.0000     | -0.0631       | 0.0000        | 0.0000    |
| 5750 | 7894498 | ---          | 0.0631     | -0.0186       | 0.0000        | 0.0000    |
| 5751 | 7974253 | ---          | 0.0000     | 0.0630        | 0.0000        | 0.0000    |
| 5752 | 8066716 | ELMO2        | 0.0629     | 0.0000        | 0.0000        | 0.0000    |
| 5753 | 8064866 | RP5-1022P6.6 | 0.0629     | 0.0000        | 0.0000        | 0.0000    |
| 5754 | 7999025 | TRAP1        | 0.0629     | 0.0000        | 0.0000        | 0.0000    |
| 5755 | 8140386 | STYXL1       | 0.0000     | 0.0000        | -0.0628       | 0.0000    |
| 5756 | 8068220 | C21orf49     | 0.0000     | 0.0000        | 0.0000        | -0.0628   |
| 5757 | 7920303 | S100A13      | 0.0000     | -0.0626       | 0.0000        | 0.0178    |
| 5758 | 8019778 | PCYT2        | 0.0000     | 0.0000        | 0.0000        | -0.0625   |
| 5759 | 7906819 | ATF6         | 0.0000     | 0.0000        | 0.0000        | -0.0623   |
| 5760 | 7944931 | SLC37A2      | -0.0275    | 0.0000        | 0.0000        | 0.0623    |
| 5761 | 7893261 | ---          | 0.0623     | 0.0000        | 0.0000        | 0.0000    |
| 5762 | 8009432 | AMZ2         | 0.0113     | 0.0000        | 0.0000        | -0.0623   |
| 5763 | 7988124 | HISPPD2A     | 0.0623     | 0.0000        | -0.0359       | 0.0000    |
| 5764 | 7904881 | PDIA3P       | 0.0000     | 0.0000        | -0.0622       | 0.0000    |

| #    | ID      | Name      | SDHB.score | SDHD-AT.score | SDHD-HN.score | VHL.score |
|------|---------|-----------|------------|---------------|---------------|-----------|
| 5765 | 7965789 | ARL1      | 0.0000     | 0.0621        | 0.0000        | 0.0000    |
| 5766 | 7924166 | BATF3     | 0.0000     | 0.0000        | 0.0621        | 0.0000    |
| 5767 | 7976101 | ZC3H14    | 0.0000     | 0.0000        | -0.0621       | 0.0000    |
| 5768 | 8169659 | NDUFA1    | 0.0000     | 0.0621        | 0.0000        | 0.0000    |
| 5769 | 7964466 | DCTN2     | 0.0000     | 0.0000        | 0.0000        | -0.0620   |
| 5770 | 7905444 | SNX27     | 0.0620     | 0.0000        | 0.0000        | 0.0000    |
| 5771 | 8137381 | AGAP3     | 0.0323     | 0.0000        | -0.0620       | 0.0000    |
| 5772 | 7980605 | KCNK10    | 0.0620     | 0.0000        | 0.0000        | 0.0000    |
| 5773 | 8043791 | INPP4A    | 0.0000     | 0.0000        | 0.0000        | -0.0620   |
| 5774 | 8167866 | PAGE2     | 0.0000     | 0.0000        | -0.0620       | 0.0000    |
| 5775 | 8086810 | SMARCC1   | 0.0000     | -0.0620       | 0.0000        | 0.0000    |
| 5776 | 8124385 | HIST1H4B  | 0.0000     | 0.0619        | 0.0000        | 0.0000    |
| 5777 | 8131374 | AIMP2     | 0.0000     | 0.0000        | 0.0000        | -0.0618   |
| 5778 | 7931216 | FAM175B   | 0.0000     | 0.0000        | 0.0000        | -0.0618   |
| 5779 | 7911114 | KIF26B    | 0.0225     | 0.0000        | -0.0617       | 0.0000    |
| 5780 | 8141791 | POLR2J3   | 0.0617     | 0.0000        | 0.0000        | 0.0000    |
| 5781 | 7959354 | BCL7A     | 0.0615     | 0.0000        | 0.0000        | 0.0000    |
| 5782 | 8087372 | CCDC71    | 0.0000     | 0.0000        | 0.0000        | -0.0615   |
| 5783 | 7911600 | NADK      | -0.0615    | 0.0000        | 0.0000        | 0.0000    |
| 5784 | 7983379 | ---       | -0.0099    | 0.0000        | 0.0000        | 0.0614    |
| 5785 | 8113773 | ALDH7A1   | 0.0136     | 0.0000        | -0.0612       | 0.0000    |
| 5786 | 8126653 | MRPL14    | 0.0445     | 0.0000        | 0.0000        | -0.0612   |
| 5787 | 7920278 | S100A3    | 0.0000     | 0.0000        | 0.0612        | 0.0000    |
| 5788 | 7899375 | ---       | -0.0612    | 0.0000        | 0.0184        | 0.0000    |
| 5789 | 7941296 | SSCA1     | 0.0612     | 0.0000        | 0.0000        | 0.0000    |
| 5790 | 8097829 | FHDC1     | -0.0430    | 0.0000        | 0.0611        | 0.0000    |
| 5791 | 8024518 | ZNF555    | 0.0000     | 0.0000        | -0.0611       | 0.0000    |
| 5792 | 8016982 | SUPT4H1   | 0.0000     | 0.0377        | 0.0000        | -0.0611   |
| 5793 | 8119926 | TMEM63B   | 0.0000     | 0.0281        | -0.0611       | 0.0000    |
| 5794 | 8172443 | TBC1D25   | 0.0000     | -0.0258       | 0.0000        | 0.0610    |
| 5795 | 7924388 | BPNT1     | 0.0000     | 0.0000        | 0.0000        | -0.0609   |
| 5796 | 8063636 | STX16     | -0.0609    | 0.0000        | 0.0000        | 0.0524    |
| 5797 | 8003733 | SGSM2     | 0.0608     | 0.0000        | 0.0000        | 0.0000    |
| 5798 | 7940698 | TAF6L     | 0.0608     | 0.0000        | 0.0000        | -0.0004   |
| 5799 | 7907353 | METTL13   | 0.0488     | 0.0000        | 0.0000        | -0.0606   |
| 5800 | 7896312 | ---       | -0.0605    | 0.0000        | 0.0000        | 0.0366    |
| 5801 | 8004111 | RABEP1    | 0.0605     | -0.0442       | 0.0000        | 0.0000    |
| 5802 | 8079217 | ZNF35     | 0.0000     | 0.0000        | 0.0000        | -0.0604   |
| 5803 | 7945979 | TRIM68    | 0.0201     | 0.0000        | 0.0000        | -0.0604   |
| 5804 | 8121563 | MARCKS    | -0.0385    | 0.0000        | 0.0604        | 0.0000    |
| 5805 | 8145136 | PPP3CC    | -0.0372    | 0.0000        | 0.0603        | 0.0000    |
| 5806 | 8173261 | ZC4H2     | 0.0000     | 0.0000        | 0.0000        | -0.0603   |
| 5807 | 7950444 | ---       | 0.0000     | 0.0000        | 0.0000        | -0.0603   |
| 5808 | 8151149 | ARFGEF1   | 0.0000     | 0.0000        | 0.0000        | 0.0603    |
| 5809 | 8138857 | GGCT      | 0.0000     | 0.0602        | -0.0180       | 0.0000    |
| 5810 | 8029831 | CALM3     | 0.0000     | 0.0000        | 0.0515        | -0.0602   |
| 5811 | 8040362 | LOC729992 | 0.0000     | 0.0602        | 0.0000        | -0.0069   |
| 5812 | 7923372 | PHLDA3    | 0.0572     | 0.0000        | 0.0000        | -0.0602   |
| 5813 | 7894725 | ---       | 0.0601     | 0.0000        | -0.0337       | 0.0000    |
| 5814 | 8014454 | MYO19     | 0.0000     | 0.0000        | -0.0600       | 0.0000    |
| 5815 | 7963713 | ATP5G2    | 0.0000     | 0.0000        | 0.0000        | -0.0600   |
| 5816 | 7949172 | MAP4K2    | 0.0600     | 0.0000        | 0.0000        | 0.0000    |
| 5817 | 7989159 | ZNF280D   | -0.0599    | 0.0000        | 0.0000        | 0.0000    |
| 5818 | 7971590 | CAB39L    | -0.0546    | 0.0210        | 0.0598        | 0.0000    |
| 5819 | 7938890 | PRMT3     | 0.0598     | 0.0000        | 0.0000        | -0.0287   |
| 5820 | 7930008 | NOLC1     | 0.0598     | 0.0000        | 0.0000        | 0.0000    |
| 5821 | 8054945 | BIN1      | 0.0000     | 0.0000        | -0.0598       | 0.0000    |
| 5822 | 8090898 | STAG1     | -0.0248    | 0.0000        | 0.0597        | 0.0000    |
| 5823 | 7962489 | PLEKHA9   | 0.0000     | 0.0000        | -0.0597       | 0.0484    |
| 5824 | 7972674 | C13orf27  | 0.0000     | 0.0294        | 0.0000        | -0.0596   |
| 5825 | 7904969 | VOPP1     | 0.0596     | 0.0000        | 0.0000        | -0.0108   |
| 5826 | 8134098 | PFTK1     | 0.0000     | 0.0000        | 0.0000        | -0.0596   |

| #    | ID      | Name          | SDHB.score | SDHD-AT.score | SDHD-HN.score | VHL.score |
|------|---------|---------------|------------|---------------|---------------|-----------|
| 5827 | 7894858 | ---           | 0.0000     | 0.0595        | 0.0000        | 0.0000    |
| 5828 | 8174373 | ---           | 0.0000     | 0.0000        | 0.0000        | 0.0595    |
| 5829 | 8136179 | ---           | 0.0342     | 0.0000        | -0.0595       | 0.0000    |
| 5830 | 7892963 | ---           | 0.0406     | 0.0000        | 0.0000        | -0.0595   |
| 5831 | 8111788 | TTC33         | 0.0000     | 0.0595        | 0.0000        | -0.0191   |
| 5832 | 8116835 | GCNT2         | -0.0593    | 0.0000        | 0.0000        | 0.0593    |
| 5833 | 8119648 | KLHDC3        | 0.0000     | 0.0593        | 0.0000        | -0.0411   |
| 5834 | 8058973 | ZNF142        | 0.0593     | 0.0000        | 0.0000        | 0.0000    |
| 5835 | 8074632 | KLHL22        | 0.0000     | 0.0000        | 0.0000        | -0.0592   |
| 5836 | 7953469 | GNB3          | 0.0592     | 0.0000        | 0.0000        | 0.0000    |
| 5837 | 7999304 | FAM86A        | 0.0574     | 0.0000        | 0.0000        | -0.0591   |
| 5838 | 8082305 | CHCHD6        | 0.0000     | 0.0590        | -0.0114       | 0.0000    |
| 5839 | 7924701 | ACBD3         | 0.0590     | 0.0000        | 0.0000        | 0.0000    |
| 5840 | 8017262 | BRIP1         | 0.0553     | 0.0000        | 0.0000        | -0.0589   |
| 5841 | 8056812 | OLA1          | 0.0000     | 0.0000        | 0.0000        | -0.0588   |
| 5842 | 7956639 | TSFM          | 0.0000     | 0.0000        | 0.0000        | -0.0588   |
| 5843 | 7990566 | ETFA          | 0.0000     | 0.0000        | 0.0000        | -0.0588   |
| 5844 | 7923438 | RPS27         | 0.0000     | 0.0000        | 0.0000        | -0.0588   |
| 5845 | 7894083 | ---           | 0.0000     | 0.0000        | 0.0587        | 0.0000    |
| 5846 | 7998072 | DEF8          | 0.0526     | 0.0000        | 0.0000        | -0.0586   |
| 5847 | 8100456 | ---           | 0.0216     | 0.0000        | 0.0000        | -0.0586   |
| 5848 | 8018761 | ST6GALNAC2    | -0.0500    | 0.0000        | 0.0586        | 0.0000    |
| 5849 | 8154059 | SMARCA2       | 0.0000     | 0.0000        | 0.0000        | 0.0586    |
| 5850 | 7934367 | ANXA7         | 0.0000     | 0.0000        | 0.0000        | -0.0585   |
| 5851 | 7996490 | TMEM208       | 0.0000     | 0.0000        | 0.0000        | -0.0585   |
| 5852 | 8072436 | INPP5J        | 0.0000     | 0.0585        | 0.0000        | -0.0558   |
| 5853 | 7940479 | TMEM216       | 0.0319     | 0.0000        | 0.0000        | -0.0584   |
| 5854 | 7929976 | RP11-529I10.4 | 0.0000     | 0.0000        | 0.0000        | 0.0584    |
| 5855 | 8007828 | MAPT          | 0.0583     | 0.0000        | 0.0000        | -0.0296   |
| 5856 | 8085033 | LMLN          | -0.0581    | 0.0000        | 0.0000        | 0.0000    |
| 5857 | 8002470 | HYDIN         | 0.0000     | 0.0000        | -0.0446       | 0.0581    |
| 5858 | 7989975 | CLN6          | 0.0581     | 0.0000        | 0.0000        | -0.0481   |
| 5859 | 8018288 | ATP5H         | 0.0000     | 0.0565        | 0.0000        | -0.0579   |
| 5860 | 7973702 | LTB4R         | 0.0579     | 0.0000        | 0.0000        | -0.0318   |
| 5861 | 8037775 | PTGIR         | 0.0000     | -0.0578       | 0.0000        | 0.0037    |
| 5862 | 8172244 | FUNDC1        | 0.0000     | 0.0578        | 0.0000        | 0.0000    |
| 5863 | 7900962 | DMAP1         | -0.0578    | 0.0000        | 0.0000        | 0.0031    |
| 5864 | 7950016 | ORAOV1        | 0.0577     | 0.0000        | 0.0000        | -0.0046   |
| 5865 | 7948267 | TIMM10        | 0.0577     | 0.0000        | 0.0000        | -0.0237   |
| 5866 | 8180408 | ---           | 0.0000     | 0.0000        | 0.0000        | -0.0577   |
| 5867 | 8114938 | JAKMIP2       | 0.0000     | 0.0000        | -0.0576       | 0.0000    |
| 5868 | 8059186 | PTPRN         | 0.0302     | 0.0035        | -0.0576       | -0.0045   |
| 5869 | 7985560 | KIAA1920      | 0.0576     | 0.0000        | 0.0000        | -0.0490   |
| 5870 | 7963024 | LMBR1L        | 0.0000     | 0.0000        | -0.0021       | 0.0575    |
| 5871 | 8099121 | STX18         | 0.0000     | 0.0000        | 0.0575        | 0.0000    |
| 5872 | 8062890 | PABPC1L       | 0.0574     | 0.0000        | 0.0000        | 0.0000    |
| 5873 | 7917754 | BCAR3         | 0.0000     | 0.0574        | 0.0000        | 0.0000    |
| 5874 | 7949482 | RNASEH2C      | 0.0369     | 0.0000        | 0.0000        | -0.0573   |
| 5875 | 8180260 | ---           | 0.0573     | 0.0000        | 0.0000        | 0.0000    |
| 5876 | 7992973 | DNAJA3        | 0.0183     | 0.0000        | 0.0000        | -0.0572   |
| 5877 | 7971780 | NEK3          | -0.0571    | 0.0000        | 0.0000        | 0.0000    |
| 5878 | 7995813 | MT1DP         | 0.0000     | 0.0000        | 0.0000        | 0.0571    |
| 5879 | 8051882 | LRPPRC        | 0.0571     | 0.0000        | 0.0000        | 0.0000    |
| 5880 | 7896427 | ---           | 0.0000     | 0.0000        | 0.0000        | 0.0570    |
| 5881 | 8180278 | ---           | 0.0570     | 0.0000        | 0.0000        | -0.0163   |
| 5882 | 7992388 | NUBP2         | 0.0000     | 0.0000        | 0.0000        | -0.0570   |
| 5883 | 8094830 | TMEM33        | 0.0000     | 0.0000        | 0.0000        | -0.0569   |
| 5884 | 7914603 | RNF19B        | -0.0305    | 0.0000        | 0.0569        | 0.0000    |
| 5885 | 8000998 | VKORC1        | 0.0000     | 0.0569        | 0.0000        | 0.0000    |
| 5886 | 7974771 | C14orf135     | 0.0422     | 0.0000        | -0.0568       | 0.0000    |
| 5887 | 8130038 | SHPRH         | 0.0000     | 0.0000        | 0.0000        | 0.0568    |
| 5888 | 7933084 | NAMPT         | -0.0567    | 0.0000        | 0.0000        | 0.0227    |

| #    | ID      | Name      | SDHB.score | SDHD-AT.score | SDHD-HN.score | VHL.score |
|------|---------|-----------|------------|---------------|---------------|-----------|
| 5889 | 8035737 | ATP13A1   | 0.0000     | 0.0567        | 0.0000        | -0.0270   |
| 5890 | 8148435 | WISP1     | 0.0000     | -0.0567       | 0.0000        | 0.0388    |
| 5891 | 7892535 | ---       | -0.0538    | 0.0566        | 0.0000        | 0.0000    |
| 5892 | 8128522 | HACE1     | 0.0000     | 0.0000        | 0.0566        | 0.0000    |
| 5893 | 8074131 | SHANK3    | -0.0566    | 0.0000        | 0.0109        | 0.0421    |
| 5894 | 8172119 | MED14     | 0.0000     | -0.0159       | 0.0000        | 0.0566    |
| 5895 | 8171493 | CTPS2     | 0.0176     | 0.0000        | -0.0565       | 0.0000    |
| 5896 | 8095703 | ---       | 0.0000     | 0.0000        | 0.0000        | 0.0565    |
| 5897 | 7895951 | ---       | 0.0000     | 0.0000        | 0.0000        | -0.0564   |
| 5898 | 7915801 | POMGNT1   | -0.0564    | 0.0000        | 0.0000        | 0.0000    |
| 5899 | 8172813 | FAM156A   | 0.0000     | 0.0000        | 0.0000        | 0.0563    |
| 5900 | 7986503 | C15orf51  | -0.0563    | 0.0000        | 0.0000        | 0.0307    |
| 5901 | 8088491 | CADPS     | 0.0000     | 0.0519        | 0.0000        | -0.0563   |
| 5902 | 7986789 | ATP10A    | -0.0394    | 0.0000        | 0.0000        | 0.0563    |
| 5903 | 8173437 | CXorf65   | 0.0000     | 0.0000        | 0.0000        | -0.0562   |
| 5904 | 7992877 | ZNF75A    | 0.0562     | 0.0000        | 0.0000        | 0.0000    |
| 5905 | 8065683 | SNTA1     | 0.0000     | 0.0000        | 0.0000        | -0.0562   |
| 5906 | 7989708 | MTFMT     | 0.0000     | 0.0000        | 0.0000        | -0.0562   |
| 5907 | 8173848 | HDX       | 0.0000     | 0.0562        | -0.0388       | 0.0000    |
| 5908 | 8149389 | FAM86B1   | 0.0411     | 0.0000        | 0.0000        | -0.0560   |
| 5909 | 8066921 | KCNB1     | 0.0000     | 0.0000        | 0.0000        | -0.0560   |
| 5910 | 7895772 | ---       | 0.0011     | 0.0000        | 0.0000        | -0.0559   |
| 5911 | 7929677 | PI4K2A    | 0.0000     | 0.0000        | 0.0000        | -0.0559   |
| 5912 | 8028266 | ZNF540    | 0.0000     | 0.0558        | 0.0000        | -0.0077   |
| 5913 | 8140530 | ---       | 0.0000     | 0.0000        | -0.0557       | 0.0000    |
| 5914 | 8169898 | RAB33A    | 0.0000     | 0.0557        | 0.0000        | -0.0214   |
| 5915 | 8110158 | ARL10     | 0.0000     | 0.0000        | -0.0556       | 0.0000    |
| 5916 | 8000582 | SULT1A2   | 0.0000     | 0.0000        | 0.0000        | 0.0556    |
| 5917 | 8011214 | RTN4RL1   | 0.0556     | 0.0000        | 0.0000        | -0.0473   |
| 5918 | 7921806 | B4GALT3   | 0.0474     | 0.0000        | 0.0000        | -0.0555   |
| 5919 | 8157264 | SLC31A2   | 0.0555     | 0.0000        | 0.0000        | -0.0258   |
| 5920 | 7936529 | KIAA1598  | 0.0554     | 0.0000        | -0.0222       | 0.0000    |
| 5921 | 8012416 | C17orf44  | 0.0000     | 0.0000        | 0.0554        | 0.0000    |
| 5922 | 8085972 | GADL1     | 0.0000     | 0.0553        | 0.0000        | 0.0000    |
| 5923 | 8021131 | KATNAL2   | 0.0000     | 0.0000        | 0.0000        | 0.0553    |
| 5924 | 8028279 | ---       | 0.0553     | 0.0000        | -0.0216       | 0.0000    |
| 5925 | 8022102 | ---       | 0.0000     | 0.0000        | 0.0553        | 0.0000    |
| 5926 | 7973709 | NFATC4    | -0.0552    | 0.0000        | 0.0125        | 0.0447    |
| 5927 | 8019083 | FLJ90757  | 0.0552     | 0.0000        | 0.0000        | 0.0000    |
| 5928 | 7954132 | C12orf60  | 0.0000     | 0.0000        | -0.0551       | 0.0000    |
| 5929 | 7966135 | CORO1C    | 0.0550     | 0.0000        | 0.0000        | 0.0000    |
| 5930 | 8083757 | NMD3      | 0.0000     | 0.0000        | 0.0550        | 0.0000    |
| 5931 | 8034514 | C19orf43  | 0.0000     | 0.0000        | 0.0000        | -0.0550   |
| 5932 | 7895077 | ---       | 0.0538     | -0.0549       | 0.0000        | 0.0000    |
| 5933 | 7916316 | TMEM48    | -0.0549    | 0.0000        | 0.0000        | 0.0000    |
| 5934 | 7918569 | ST7L      | -0.0549    | 0.0000        | 0.0000        | 0.0000    |
| 5935 | 8001746 | SNORA46   | 0.0000     | 0.0000        | 0.0000        | 0.0548    |
| 5936 | 7895846 | ---       | 0.0000     | 0.0547        | 0.0000        | -0.0015   |
| 5937 | 8010946 | GEMIN4    | 0.0546     | 0.0000        | 0.0000        | 0.0000    |
| 5938 | 7922104 | GCSH      | 0.0000     | 0.0227        | 0.0000        | -0.0546   |
| 5939 | 8140454 | SPDYE1    | 0.0000     | 0.0000        | -0.0546       | 0.0000    |
| 5940 | 8142120 | NAMPT     | -0.0545    | 0.0000        | 0.0157        | 0.0000    |
| 5941 | 8023984 | HCN2      | 0.0515     | 0.0000        | 0.0000        | -0.0545   |
| 5942 | 8081880 | ADPRH     | -0.0453    | 0.0000        | 0.0544        | 0.0000    |
| 5943 | 8144528 | TNKS      | 0.0000     | 0.0000        | -0.0543       | 0.0000    |
| 5944 | 8149762 | TNFRSF10A | 0.0000     | -0.0543       | 0.0000        | 0.0106    |
| 5945 | 7905171 | PRPF3     | 0.0000     | -0.0542       | 0.0000        | 0.0000    |
| 5946 | 8158513 | DOLPP1    | 0.0000     | 0.0506        | 0.0000        | -0.0541   |
| 5947 | 8094086 | ---       | 0.0000     | 0.0000        | 0.0000        | -0.0541   |
| 5948 | 8010137 | SCARNA16  | 0.0000     | 0.0000        | 0.0000        | 0.0540    |
| 5949 | 7977584 | TMEM55B   | 0.0540     | 0.0000        | -0.0404       | -0.0361   |
| 5950 | 8114658 | DIAPH1    | 0.0000     | -0.0540       | 0.0000        | 0.0000    |



| #    | ID      | Name         | SDHB.score | SDHD-AT.score | SDHD-HN.score | VHL.score |
|------|---------|--------------|------------|---------------|---------------|-----------|
| 5951 | 8105523 | KIF2A        | 0.0540     | 0.0000        | 0.0000        | -0.0454   |
| 5952 | 7920409 | JTB          | 0.0000     | 0.0000        | 0.0000        | -0.0538   |
| 5953 | 8173513 | RPS4X        | 0.0000     | 0.0000        | 0.0000        | -0.0538   |
| 5954 | 7967084 | POP5         | 0.0000     | 0.0000        | 0.0000        | -0.0538   |
| 5955 | 8078805 | ACVR2B       | 0.0000     | 0.0000        | -0.0538       | 0.0000    |
| 5956 | 8180309 | ---          | -0.0044    | 0.0000        | 0.0538        | 0.0000    |
| 5957 | 8139276 | PGAM2        | 0.0000     | 0.0000        | -0.0537       | 0.0000    |
| 5958 | 8056217 | MXRA7        | 0.0158     | 0.0000        | -0.0537       | 0.0000    |
| 5959 | 8003553 | CENPBD1      | 0.0536     | 0.0000        | 0.0000        | -0.0052   |
| 5960 | 8008339 | RSAD1        | 0.0536     | 0.0000        | 0.0000        | 0.0000    |
| 5961 | 8081779 | ZDHC23       | 0.0060     | 0.0000        | 0.0000        | -0.0536   |
| 5962 | 7905664 | SLC27A3      | 0.0000     | 0.0000        | 0.0535        | 0.0000    |
| 5963 | 7949490 | DKFZp761E198 | 0.0491     | 0.0000        | 0.0000        | -0.0535   |
| 5964 | 8087885 | BAP1         | 0.0000     | 0.0000        | 0.0000        | -0.0535   |
| 5965 | 8096025 | ---          | 0.0000     | 0.0000        | 0.0535        | 0.0000    |
| 5966 | 8090715 | ACAD11       | -0.0535    | 0.0000        | 0.0148        | 0.0000    |
| 5967 | 7951068 | CWC15        | 0.0535     | 0.0000        | 0.0000        | -0.0528   |
| 5968 | 7954124 | H2AF1        | -0.0098    | 0.0000        | 0.0000        | 0.0533    |
| 5969 | 8098177 | KLHL2        | -0.0533    | 0.0000        | 0.0136        | 0.0096    |
| 5970 | 7954604 | KLHDC5       | 0.0505     | 0.0000        | 0.0000        | -0.0532   |
| 5971 | 8109283 | NDST1        | 0.0000     | 0.0000        | 0.0532        | 0.0000    |
| 5972 | 7914489 | PTP4A2       | -0.0532    | 0.0000        | 0.0000        | 0.0000    |
| 5973 | 8018731 | RHBDP2       | -0.0532    | 0.0000        | 0.0000        | 0.0185    |
| 5974 | 8057732 | TMEM194B     | -0.0371    | 0.0000        | 0.0531        | 0.0050    |
| 5975 | 7906133 | PMF1         | 0.0000     | 0.0531        | 0.0000        | 0.0000    |
| 5976 | 7978626 | ---          | -0.0059    | 0.0000        | 0.0000        | 0.0531    |
| 5977 | 7928147 | ADAMTS14     | 0.0000     | 0.0000        | 0.0531        | 0.0000    |
| 5978 | 8143397 | DENND2A      | -0.0531    | 0.0000        | 0.0000        | 0.0000    |
| 5979 | 8050594 | HS1BP3       | 0.0124     | 0.0000        | 0.0000        | -0.0530   |
| 5980 | 8026407 | SYDE1        | -0.0116    | 0.0000        | 0.0529        | 0.0000    |
| 5981 | 8019494 | C17orf101    | 0.0000     | 0.0000        | -0.0529       | 0.0000    |
| 5982 | 7956838 | ---          | -0.0528    | 0.0000        | 0.0000        | 0.0514    |
| 5983 | 8146579 | CHD7         | 0.0000     | 0.0000        | 0.0000        | 0.0527    |
| 5984 | 8157454 | ATP6V1G1     | 0.0000     | 0.0527        | 0.0000        | 0.0000    |
| 5985 | 7927799 | REEP3        | -0.0217    | -0.0244       | 0.0527        | 0.0053    |
| 5986 | 7895290 | ---          | 0.0526     | 0.0000        | 0.0000        | 0.0000    |
| 5987 | 7896368 | ---          | 0.0000     | 0.0000        | 0.0056        | -0.0526   |
| 5988 | 8068786 | ---          | 0.0000     | 0.0000        | 0.0000        | 0.0526    |
| 5989 | 7913110 | KIAA0090     | -0.0525    | 0.0210        | 0.0000        | 0.0379    |
| 5990 | 7921538 | IGSF8        | 0.0000     | 0.0524        | 0.0000        | 0.0000    |
| 5991 | 8103630 | SH3RF1       | 0.0000     | -0.0524       | 0.0000        | 0.0000    |
| 5992 | 7980636 | EML5         | 0.0022     | 0.0000        | 0.0000        | -0.0524   |
| 5993 | 8084478 | FAM131A      | 0.0000     | 0.0000        | -0.0524       | 0.0000    |
| 5994 | 8059341 | ---          | 0.0524     | 0.0000        | 0.0000        | 0.0000    |
| 5995 | 8129861 | IFNGR1       | -0.0445    | 0.0000        | 0.0522        | 0.0000    |
| 5996 | 8178598 | CLIC1        | -0.0522    | 0.0000        | 0.0400        | 0.0000    |
| 5997 | 8022434 | ---          | -0.0164    | 0.0000        | 0.0000        | 0.0522    |
| 5998 | 8010918 | VPS53        | 0.0000     | -0.0522       | 0.0000        | 0.0000    |
| 5999 | 8034583 | SYCE2        | 0.0521     | 0.0000        | 0.0000        | -0.0153   |
| 6000 | 7933121 | CCNYL2       | 0.0521     | 0.0000        | 0.0000        | -0.0353   |
| 6001 | 8035896 | TSHZ3        | 0.0520     | 0.0000        | -0.0045       | 0.0000    |
| 6002 | 7981996 | SNORD116-24  | 0.0000     | 0.0519        | 0.0000        | 0.0000    |
| 6003 | 8130939 | DLL1         | -0.0261    | 0.0000        | 0.0000        | 0.0519    |
| 6004 | 7969114 | SETDB2       | -0.0518    | 0.0000        | 0.0000        | 0.0000    |
| 6005 | 7937443 | EPS8L2       | 0.0000     | 0.0000        | 0.0000        | 0.0516    |
| 6006 | 7914202 | SNHG12       | -0.0516    | 0.0000        | 0.0000        | 0.0000    |
| 6007 | 8048673 | SLC4A3       | 0.0000     | 0.0000        | -0.0516       | 0.0000    |
| 6008 | 7981949 | SNORD116-1   | 0.0000     | 0.0516        | 0.0000        | 0.0000    |
| 6009 | 8061211 | DTD1         | 0.0104     | 0.0000        | 0.0000        | -0.0516   |
| 6010 | 8013581 | IFT20        | 0.0000     | 0.0516        | 0.0000        | 0.0000    |
| 6011 | 7915329 | ---          | 0.0000     | 0.0516        | 0.0000        | 0.0000    |
| 6012 | 8021653 | SERPINB8     | -0.0515    | 0.0000        | 0.0480        | 0.0000    |

| #    | ID      | Name      | SDHB.score | SDHD-AT.score | SDHD-HN.score | VHL.score |
|------|---------|-----------|------------|---------------|---------------|-----------|
| 6013 | 8043564 | FAHD2A    | 0.0000     | 0.0000        | 0.0000        | -0.0515   |
| 6014 | 7996051 | POLR2C    | 0.0000     | 0.0330        | 0.0000        | -0.0515   |
| 6015 | 8009253 | ---       | 0.0000     | -0.0515       | 0.0000        | 0.0000    |
| 6016 | 8094874 | ---       | 0.0000     | 0.0172        | 0.0000        | -0.0515   |
| 6017 | 8019367 | RFNG      | 0.0000     | 0.0000        | 0.0000        | -0.0514   |
| 6018 | 8016018 | SLC25A39  | 0.0000     | 0.0029        | 0.0000        | -0.0514   |
| 6019 | 8120208 | ---       | 0.0000     | 0.0000        | -0.0513       | 0.0000    |
| 6020 | 7895521 | ---       | 0.0000     | -0.0513       | 0.0000        | 0.0000    |
| 6021 | 7977854 | JUB       | 0.0000     | 0.0000        | 0.0513        | 0.0000    |
| 6022 | 8029129 | RPS19     | 0.0000     | 0.0000        | 0.0000        | -0.0513   |
| 6023 | 7992518 | RAB26     | 0.0000     | 0.0000        | 0.0000        | -0.0512   |
| 6024 | 8139228 | C7orf25   | 0.0281     | 0.0000        | 0.0000        | -0.0512   |
| 6025 | 7900157 | RPS27     | 0.0000     | 0.0000        | 0.0000        | -0.0511   |
| 6026 | 7906954 | PBX1      | 0.0000     | 0.0000        | -0.0511       | 0.0421    |
| 6027 | 8051814 | ZFP36L2   | -0.0511    | 0.0000        | 0.0401        | 0.0000    |
| 6028 | 8119132 | FGD2      | -0.0509    | 0.0000        | 0.0315        | 0.0000    |
| 6029 | 7936673 | RGS10     | 0.0000     | 0.0000        | 0.0509        | 0.0000    |
| 6030 | 8178050 | CSNK2B    | 0.0000     | 0.0000        | 0.0000        | -0.0508   |
| 6031 | 7953934 | ---       | 0.0000     | 0.0508        | 0.0000        | 0.0000    |
| 6032 | 7980189 | KIAA0317  | 0.0000     | 0.0000        | 0.0000        | -0.0507   |
| 6033 | 8011516 | ATP2A3    | 0.0000     | 0.0000        | 0.0507        | 0.0000    |
| 6034 | 8145454 | BNIP3L    | 0.0000     | 0.0000        | 0.0000        | 0.0506    |
| 6035 | 7924897 | C1orf96   | 0.0000     | 0.0000        | -0.0316       | 0.0505    |
| 6036 | 8062844 | TTPAL     | 0.0067     | 0.0000        | 0.0000        | -0.0505   |
| 6037 | 8109179 | PPARGC1B  | 0.0505     | 0.0000        | 0.0000        | 0.0000    |
| 6038 | 7997272 | GABARAPL2 | 0.0000     | 0.0289        | 0.0000        | -0.0504   |
| 6039 | 7920472 | TPM3      | 0.0000     | 0.0000        | 0.0503        | 0.0000    |
| 6040 | 8134599 | CPSF4     | 0.0503     | 0.0000        | 0.0000        | 0.0000    |
| 6041 | 7947649 | CHRM4     | 0.0502     | 0.0000        | 0.0000        | -0.0075   |
| 6042 | 7893779 | ---       | -0.0031    | 0.0000        | 0.0000        | 0.0502    |
| 6043 | 8168875 | ARMCX3    | 0.0099     | 0.0000        | 0.0000        | -0.0502   |
| 6044 | 7909789 | TGFB2     | -0.0251    | 0.0000        | 0.0500        | 0.0000    |
| 6045 | 8053763 | MRPS5     | 0.0000     | 0.0000        | 0.0000        | -0.0500   |
| 6046 | 7894416 | ---       | 0.0000     | 0.0000        | 0.0000        | -0.0499   |
| 6047 | 8027330 | PCGF6     | 0.0247     | 0.0000        | 0.0000        | -0.0498   |
| 6048 | 8171837 | KLHL15    | 0.0497     | 0.0000        | -0.0288       | 0.0000    |
| 6049 | 8025421 | MARCH2    | 0.0000     | 0.0000        | 0.0000        | -0.0497   |
| 6050 | 7927099 | LOC84856  | 0.0497     | 0.0000        | 0.0000        | 0.0000    |
| 6051 | 8173524 | CITED1    | 0.0491     | 0.0000        | 0.0000        | -0.0496   |
| 6052 | 7904486 | NBPF20    | 0.0000     | -0.0496       | 0.0000        | 0.0000    |
| 6053 | 7988077 | LCMT2     | 0.0108     | 0.0000        | 0.0000        | -0.0496   |
| 6054 | 7959078 | ---       | 0.0000     | 0.0000        | 0.0000        | -0.0496   |
| 6055 | 8167042 | RBM10     | 0.0000     | 0.0000        | -0.0495       | 0.0000    |
| 6056 | 7935882 | FBXW4     | 0.0000     | 0.0495        | 0.0000        | 0.0000    |
| 6057 | 8004521 | MPDU1     | 0.0000     | 0.0000        | 0.0000        | -0.0495   |
| 6058 | 7915207 | PABPC4    | 0.0000     | 0.0047        | -0.0494       | 0.0000    |
| 6059 | 8000217 | SMG1      | 0.0000     | -0.0494       | 0.0000        | 0.0067    |
| 6060 | 7914354 | PEF1      | 0.0000     | 0.0493        | 0.0000        | 0.0000    |
| 6061 | 8139879 | ---       | 0.0000     | 0.0493        | 0.0000        | 0.0000    |
| 6062 | 8126360 | MED20     | 0.0000     | 0.0000        | 0.0000        | -0.0491   |
| 6063 | 8154359 | RPL18A    | 0.0000     | 0.0491        | 0.0000        | 0.0000    |
| 6064 | 7911730 | PANK4     | -0.0491    | 0.0000        | 0.0000        | 0.0000    |
| 6065 | 8033392 | XAB2      | 0.0000     | 0.0490        | -0.0443       | 0.0000    |
| 6066 | 8000167 | SMG1      | 0.0000     | -0.0490       | 0.0000        | 0.0000    |
| 6067 | 8120579 | C6orf57   | 0.0000     | 0.0000        | -0.0490       | 0.0000    |
| 6068 | 8117225 | GMNN      | 0.0224     | 0.0000        | 0.0000        | -0.0490   |
| 6069 | 8047606 | NBEAL1    | -0.0489    | 0.0000        | 0.0000        | 0.0223    |
| 6070 | 8089040 | MINA      | 0.0000     | 0.0000        | 0.0000        | -0.0489   |
| 6071 | 8133309 | PMS2L5    | 0.0488     | 0.0000        | 0.0000        | 0.0000    |
| 6072 | 8174576 | AMOT      | 0.0000     | 0.0000        | -0.0487       | 0.0178    |
| 6073 | 8140258 | PMS2L5    | 0.0487     | 0.0000        | 0.0000        | 0.0000    |
| 6074 | 7988713 | TRPM7     | 0.0000     | 0.0000        | 0.0000        | -0.0486   |

| #    | ID      | Name         | SDHB.score | SDHD-AT.score | SDHD-HN.score | VHL.score |
|------|---------|--------------|------------|---------------|---------------|-----------|
| 6075 | 7893642 | ---          | 0.0485     | 0.0000        | 0.0000        | 0.0000    |
| 6076 | 7894674 | ---          | 0.0484     | 0.0000        | -0.0271       | 0.0000    |
| 6077 | 7900468 | NFYC         | -0.0483    | 0.0000        | 0.0000        | 0.0000    |
| 6078 | 8087925 | TNNC1        | 0.0000     | 0.0000        | 0.0000        | 0.0481    |
| 6079 | 8180270 | ---          | 0.0159     | 0.0214        | -0.0480       | 0.0000    |
| 6080 | 8120428 | FKBP1A       | -0.0182    | 0.0000        | 0.0480        | 0.0000    |
| 6081 | 8150112 | GSR          | 0.0160     | 0.0000        | -0.0479       | 0.0000    |
| 6082 | 7943580 | CUL5         | 0.0479     | -0.0280       | 0.0000        | 0.0000    |
| 6083 | 7950471 | OR2AT4       | 0.0478     | 0.0000        | 0.0000        | 0.0000    |
| 6084 | 7895328 | ---          | 0.0000     | 0.0000        | -0.0478       | 0.0000    |
| 6085 | 8019796 | MAFG         | 0.0143     | 0.0000        | 0.0000        | -0.0477   |
| 6086 | 7892920 | ---          | 0.0000     | -0.0300       | 0.0000        | 0.0475    |
| 6087 | 8082745 | CCRL1        | 0.0000     | 0.0000        | 0.0474        | 0.0000    |
| 6088 | 7904431 | ---          | 0.0000     | 0.0000        | 0.0000        | 0.0474    |
| 6089 | 8139712 | VOPP1        | 0.0474     | 0.0000        | 0.0000        | 0.0000    |
| 6090 | 8157214 | ---          | -0.0474    | 0.0000        | 0.0000        | 0.0000    |
| 6091 | 8032214 | GAMT         | 0.0000     | 0.0036        | 0.0000        | -0.0473   |
| 6092 | 7925677 | ZNF669       | 0.0000     | 0.0000        | 0.0000        | -0.0473   |
| 6093 | 8094372 | SOD3         | 0.0000     | 0.0000        | 0.0473        | 0.0000    |
| 6094 | 7994026 | NPIPL3       | 0.0000     | -0.0473       | 0.0000        | 0.0378    |
| 6095 | 7922001 | FAM78B       | 0.0000     | 0.0000        | 0.0472        | 0.0000    |
| 6096 | 8034097 | LOC147727    | 0.0000     | 0.0000        | 0.0000        | -0.0472   |
| 6097 | 8104592 | FBXL7        | 0.0000     | 0.0000        | 0.0471        | 0.0000    |
| 6098 | 8019280 | PCYT2        | 0.0000     | 0.0000        | 0.0000        | -0.0471   |
| 6099 | 8061483 | CTD-2514C3.1 | -0.0471    | 0.0000        | 0.0000        | 0.0353    |
| 6100 | 8073766 | RIBC2        | 0.0000     | 0.0000        | 0.0000        | 0.0469    |
| 6101 | 8162294 | SPTLC1       | -0.0469    | 0.0000        | 0.0000        | 0.0319    |
| 6102 | 8008795 | C17orf71     | 0.0000     | 0.0000        | 0.0000        | -0.0466   |
| 6103 | 8150489 | ---          | 0.0000     | 0.0000        | 0.0000        | -0.0465   |
| 6104 | 8062371 | MANBAL       | 0.0000     | 0.0465        | 0.0000        | 0.0000    |
| 6105 | 7915363 | SCMH1        | -0.0465    | 0.0037        | 0.0000        | 0.0000    |
| 6106 | 7896050 | ---          | 0.0465     | 0.0000        | 0.0000        | 0.0000    |
| 6107 | 7903867 | KCNC4        | -0.0465    | 0.0032        | 0.0000        | 0.0000    |
| 6108 | 7948293 | MED19        | 0.0464     | 0.0000        | 0.0000        | 0.0000    |
| 6109 | 8127872 | SNAP91       | 0.0464     | 0.0000        | -0.0298       | 0.0000    |
| 6110 | 8000676 | NPIPL3       | 0.0000     | -0.0463       | 0.0000        | 0.0288    |
| 6111 | 7919780 | GOLPH3L      | 0.0000     | 0.0000        | 0.0000        | -0.0463   |
| 6112 | 8003204 | GINS2        | 0.0463     | 0.0000        | 0.0000        | 0.0000    |
| 6113 | 7905677 | CREB3L4      | 0.0463     | 0.0000        | -0.0395       | 0.0000    |
| 6114 | 7893664 | ---          | 0.0381     | 0.0000        | 0.0000        | -0.0463   |
| 6115 | 8132832 | LOC100129427 | 0.0000     | 0.0000        | -0.0462       | 0.0000    |
| 6116 | 8020411 | SNRPD1       | 0.0126     | 0.0000        | 0.0000        | -0.0462   |
| 6117 | 8081429 | ---          | 0.0000     | 0.0000        | 0.0000        | -0.0462   |
| 6118 | 7924476 | TAF1A        | 0.0462     | 0.0000        | -0.0301       | 0.0000    |
| 6119 | 8164701 | SETX         | 0.0000     | -0.0462       | 0.0000        | 0.0000    |
| 6120 | 8026638 | MYO9B        | 0.0000     | 0.0000        | 0.0000        | 0.0461    |
| 6121 | 7978366 | GZMB         | 0.0000     | 0.0000        | 0.0460        | 0.0000    |
| 6122 | 8075820 | CACNG2       | 0.0459     | 0.0000        | -0.0433       | -0.0220   |
| 6123 | 7914516 | MTMR9L       | -0.0272    | 0.0000        | 0.0000        | 0.0459    |
| 6124 | 8025470 | OR7D2        | 0.0000     | 0.0459        | 0.0000        | 0.0000    |
| 6125 | 8075057 | ---          | 0.0000     | 0.0000        | 0.0000        | -0.0459   |
| 6126 | 8099388 | HS3ST1       | 0.0000     | 0.0000        | 0.0216        | -0.0459   |
| 6127 | 7906671 | USP21        | 0.0459     | 0.0000        | 0.0000        | 0.0000    |
| 6128 | 8168316 | OGT          | 0.0000     | 0.0000        | 0.0000        | 0.0458    |
| 6129 | 8160953 | PIGO         | 0.0458     | 0.0000        | 0.0000        | 0.0000    |
| 6130 | 8060257 | STK25        | 0.0103     | 0.0000        | 0.0000        | -0.0458   |
| 6131 | 7953687 | ---          | 0.0000     | 0.0458        | 0.0000        | 0.0000    |
| 6132 | 7892983 | ---          | 0.0000     | 0.0000        | 0.0000        | 0.0458    |
| 6133 | 8100210 | TXK          | -0.0266    | 0.0000        | 0.0457        | 0.0000    |
| 6134 | 8014349 | CCL14-CCL15  | -0.0457    | 0.0000        | 0.0132        | 0.0000    |
| 6135 | 8000590 | SULT1A1      | 0.0000     | 0.0000        | 0.0000        | 0.0456    |
| 6136 | 7942562 | NEU3         | 0.0455     | 0.0000        | 0.0000        | 0.0000    |

| #    | ID      | Name        | SDHB.score | SDHD-AT.score | SDHD-HN.score | VHL.score |
|------|---------|-------------|------------|---------------|---------------|-----------|
| 6137 | 7896351 | ---         | 0.0000     | -0.0455       | 0.0000        | 0.0340    |
| 6138 | 7934185 | C10orf54    | -0.0455    | 0.0000        | 0.0393        | 0.0000    |
| 6139 | 8037913 | NAPA        | 0.0000     | 0.0026        | 0.0000        | -0.0455   |
| 6140 | 7893994 | ---         | -0.0454    | 0.0000        | 0.0070        | 0.0000    |
| 6141 | 8012166 | NEURL4      | 0.0454     | 0.0000        | 0.0000        | 0.0000    |
| 6142 | 8134374 | ---         | 0.0000     | 0.0000        | 0.0000        | 0.0454    |
| 6143 | 8149718 | FLJ14107    | 0.0000     | 0.0000        | 0.0000        | 0.0452    |
| 6144 | 8036622 | RINL        | 0.0452     | 0.0000        | 0.0000        | 0.0000    |
| 6145 | 7951521 | C11orf65    | 0.0451     | 0.0000        | 0.0000        | 0.0000    |
| 6146 | 7899187 | HMG2        | -0.0451    | 0.0000        | 0.0000        | 0.0000    |
| 6147 | 8023926 | PARD6G      | 0.0000     | 0.0000        | 0.0450        | 0.0000    |
| 6148 | 7984704 | NEO1        | 0.0450     | 0.0000        | 0.0000        | -0.0249   |
| 6149 | 7923707 | TMEM81      | 0.0449     | 0.0000        | 0.0000        | 0.0000    |
| 6150 | 7967039 | MSI1        | 0.0000     | 0.0000        | 0.0000        | 0.0448    |
| 6151 | 7896517 | ---         | 0.0000     | 0.0000        | 0.0000        | 0.0447    |
| 6152 | 8041283 | BIRC6       | 0.0000     | 0.0000        | 0.0000        | 0.0447    |
| 6153 | 8019308 | MAFG        | 0.0350     | 0.0000        | 0.0000        | -0.0447   |
| 6154 | 8024299 | RPS15       | 0.0000     | 0.0000        | 0.0000        | -0.0446   |
| 6155 | 7907492 | RABGAP1L    | 0.0446     | 0.0000        | 0.0000        | -0.0286   |
| 6156 | 8161839 | C9orf95     | -0.0175    | 0.0000        | 0.0000        | 0.0446    |
| 6157 | 8134981 | TRIP6       | -0.0445    | 0.0000        | 0.0402        | 0.0000    |
| 6158 | 7995907 | CETP        | 0.0000     | 0.0000        | 0.0000        | 0.0445    |
| 6159 | 8125752 | CUTA        | 0.0000     | 0.0444        | 0.0000        | 0.0000    |
| 6160 | 8173596 | PABPC1L2A   | 0.0000     | 0.0444        | 0.0000        | 0.0000    |
| 6161 | 8145005 | EPB49       | 0.0000     | 0.0068        | -0.0444       | 0.0000    |
| 6162 | 7893103 | ---         | 0.0000     | 0.0000        | -0.0444       | 0.0000    |
| 6163 | 8073474 | MEI1        | 0.0000     | 0.0000        | 0.0444        | 0.0000    |
| 6164 | 8162744 | CORO2A      | 0.0443     | 0.0000        | 0.0000        | 0.0000    |
| 6165 | 7934196 | PSAP        | 0.0442     | 0.0000        | 0.0000        | 0.0000    |
| 6166 | 8024347 | SCAMP4      | 0.0000     | 0.0000        | 0.0000        | -0.0442   |
| 6167 | 8081786 | QTRTD1      | -0.0441    | 0.0000        | 0.0000        | 0.0000    |
| 6168 | 7911486 | CPSF3L      | -0.0441    | 0.0000        | 0.0000        | 0.0000    |
| 6169 | 8133531 | PMS2L5      | 0.0441     | 0.0000        | 0.0000        | 0.0000    |
| 6170 | 7904500 | NBPF12      | 0.0000     | -0.0440       | 0.0000        | 0.0000    |
| 6171 | 7997332 | NUDT7       | 0.0000     | 0.0000        | -0.0440       | 0.0000    |
| 6172 | 8168393 | PABPC1L2B   | 0.0000     | 0.0440        | 0.0000        | 0.0000    |
| 6173 | 8141829 | POLR2J2     | 0.0439     | 0.0000        | 0.0000        | 0.0000    |
| 6174 | 7905691 | RPS27       | 0.0000     | 0.0000        | 0.0000        | -0.0439   |
| 6175 | 8092596 | DGKG        | 0.0000     | 0.0000        | -0.0439       | 0.0376    |
| 6176 | 7921121 | MRPL24      | 0.0438     | 0.0000        | 0.0000        | -0.0361   |
| 6177 | 8109612 | ADRA1B      | 0.0000     | 0.0000        | 0.0000        | 0.0438    |
| 6178 | 7904874 | RP11-94I2.2 | 0.0000     | -0.0438       | 0.0000        | 0.0000    |
| 6179 | 8080980 | FLJ10213    | -0.0423    | 0.0000        | 0.0438        | 0.0000    |
| 6180 | 8017186 | HEATR6      | 0.0000     | 0.0000        | 0.0000        | -0.0438   |
| 6181 | 8110685 | LOC25845    | 0.0000     | 0.0000        | 0.0000        | -0.0437   |
| 6182 | 8036473 | PPP1R14A    | -0.0436    | 0.0000        | 0.0333        | 0.0000    |
| 6183 | 7899462 | RCC1        | -0.0406    | 0.0000        | 0.0436        | 0.0000    |
| 6184 | 7896464 | ---         | -0.0307    | 0.0000        | 0.0000        | 0.0436    |
| 6185 | 8087833 | DUSP7       | -0.0436    | 0.0000        | 0.0000        | 0.0000    |
| 6186 | 7920531 | ADAR        | 0.0436     | 0.0000        | -0.0027       | 0.0000    |
| 6187 | 7893880 | ---         | 0.0435     | 0.0000        | 0.0000        | 0.0000    |
| 6188 | 8143961 | PRKAG2      | -0.0434    | 0.0000        | 0.0000        | 0.0011    |
| 6189 | 8094501 | STIM2       | 0.0000     | 0.0000        | 0.0434        | 0.0000    |
| 6190 | 8002999 | GCSH        | 0.0000     | 0.0031        | 0.0000        | -0.0433   |
| 6191 | 8101844 | ADH5        | 0.0000     | 0.0000        | 0.0000        | -0.0432   |
| 6192 | 7958692 | TCTN1       | 0.0000     | 0.0432        | 0.0000        | 0.0000    |
| 6193 | 8117881 | RPP21       | 0.0000     | 0.0000        | 0.0000        | -0.0431   |
| 6194 | 7930031 | GBF1        | 0.0000     | 0.0000        | -0.0431       | 0.0000    |
| 6195 | 8021357 | ONECUT2     | 0.0430     | 0.0000        | 0.0000        | -0.0128   |
| 6196 | 8163086 | C9orf5      | 0.0000     | 0.0429        | -0.0261       | 0.0000    |
| 6197 | 8047596 | NBEAL1      | -0.0429    | 0.0000        | 0.0000        | 0.0000    |
| 6198 | 8016371 | SCRN2       | 0.0000     | 0.0000        | 0.0000        | -0.0428   |

| #    | ID      | Name         | SDHB.score | SDHD-AT.score | SDHD-HN.score | VHL.score |
|------|---------|--------------|------------|---------------|---------------|-----------|
| 6199 | 7943890 | LOC100132686 | 0.0000     | 0.0000        | 0.0000        | 0.0428    |
| 6200 | 7894186 | ---          | 0.0428     | 0.0000        | 0.0000        | 0.0000    |
| 6201 | 8009737 | KCTD2        | 0.0427     | 0.0000        | 0.0000        | -0.0309   |
| 6202 | 8168524 | P2RY10       | 0.0000     | 0.0000        | 0.0427        | 0.0000    |
| 6203 | 7942839 | PCF11        | 0.0000     | 0.0000        | 0.0000        | 0.0426    |
| 6204 | 7895515 | ---          | 0.0000     | -0.0425       | 0.0000        | 0.0000    |
| 6205 | 8137566 | RNF32        | 0.0425     | 0.0000        | 0.0000        | 0.0000    |
| 6206 | 8171879 | ---          | 0.0000     | 0.0329        | 0.0000        | -0.0425   |
| 6207 | 7892771 | ---          | 0.0234     | 0.0000        | -0.0425       | 0.0000    |
| 6208 | 8025028 | CLPP         | 0.0000     | 0.0000        | 0.0000        | -0.0424   |
| 6209 | 8072206 | EWSR1        | 0.0000     | 0.0000        | 0.0000        | 0.0424    |
| 6210 | 8056100 | ---          | 0.0000     | 0.0000        | 0.0000        | 0.0423    |
| 6211 | 8086467 | ANO10        | 0.0000     | 0.0000        | 0.0098        | -0.0422   |
| 6212 | 8082314 | PLXNA1       | 0.0000     | 0.0422        | -0.0393       | 0.0000    |
| 6213 | 8010562 | BAIAP2       | 0.0422     | 0.0000        | -0.0174       | 0.0000    |
| 6214 | 8125887 | TEAD3        | 0.0000     | 0.0000        | 0.0421        | 0.0000    |
| 6215 | 7894269 | ---          | 0.0000     | 0.0000        | -0.0421       | 0.0000    |
| 6216 | 8000399 | ZKSCAN2      | 0.0419     | 0.0000        | -0.0217       | 0.0000    |
| 6217 | 7958346 | C12orf23     | 0.0086     | 0.0000        | -0.0419       | 0.0000    |
| 6218 | 8139460 | NACAD        | 0.0000     | 0.0000        | -0.0419       | 0.0000    |
| 6219 | 7957759 | APAF1        | 0.0000     | 0.0000        | 0.0000        | 0.0419    |
| 6220 | 8101925 | MAPKSP1      | 0.0000     | 0.0032        | 0.0000        | -0.0418   |
| 6221 | 8096314 | PKD2         | -0.0418    | 0.0000        | 0.0126        | 0.0000    |
| 6222 | 7917976 | SASS6        | 0.0000     | 0.0418        | 0.0000        | 0.0000    |
| 6223 | 8075430 | MORC2        | 0.0141     | 0.0000        | -0.0417       | 0.0000    |
| 6224 | 7896337 | ---          | -0.0417    | 0.0000        | 0.0296        | 0.0027    |
| 6225 | 7923453 | KDM5B        | 0.0414     | 0.0000        | 0.0000        | 0.0000    |
| 6226 | 8062206 | ROMO1        | 0.0000     | 0.0000        | 0.0000        | -0.0414   |
| 6227 | 7951734 | ZW10         | 0.0414     | 0.0000        | 0.0000        | 0.0000    |
| 6228 | 7952490 | FEZ1         | 0.0414     | 0.0000        | 0.0000        | 0.0000    |
| 6229 | 8105499 | NDUFAF2      | 0.0000     | 0.0000        | 0.0000        | -0.0413   |
| 6230 | 8155332 | C7orf70      | 0.0000     | 0.0000        | 0.0000        | -0.0413   |
| 6231 | 8112584 | ZNF366       | -0.0403    | 0.0000        | 0.0412        | 0.0000    |
| 6232 | 8165438 | DPP7         | 0.0000     | 0.0000        | -0.0412       | 0.0000    |
| 6233 | 8089029 | DHFRL1       | 0.0000     | 0.0000        | 0.0000        | -0.0411   |
| 6234 | 8098581 | SNX25        | 0.0000     | 0.0000        | 0.0000        | 0.0411    |
| 6235 | 7997128 | IL34         | -0.0411    | 0.0000        | 0.0000        | 0.0000    |
| 6236 | 7992439 | GFER         | 0.0000     | 0.0000        | 0.0000        | -0.0410   |
| 6237 | 8155707 | TJP2         | 0.0000     | 0.0000        | 0.0409        | 0.0000    |
| 6238 | 7967002 | PXN          | 0.0000     | 0.0000        | 0.0000        | 0.0409    |
| 6239 | 8109428 | SAP30L       | 0.0408     | 0.0000        | 0.0000        | 0.0000    |
| 6240 | 8114476 | SIL1         | 0.0408     | 0.0000        | 0.0000        | 0.0000    |
| 6241 | 8079019 | RPS27        | 0.0000     | 0.0000        | 0.0000        | -0.0407   |
| 6242 | 7998015 | SPIRE2       | 0.0407     | 0.0000        | -0.0159       | 0.0000    |
| 6243 | 8138030 | PMS2         | 0.0000     | 0.0000        | -0.0405       | 0.0000    |
| 6244 | 8079149 | ---          | -0.0054    | 0.0000        | 0.0000        | 0.0405    |
| 6245 | 8065762 | PIGU         | 0.0000     | 0.0000        | 0.0000        | -0.0404   |
| 6246 | 7896653 | ---          | 0.0000     | 0.0000        | 0.0000        | -0.0404   |
| 6247 | 7944418 | C2CD2L       | 0.0404     | 0.0000        | 0.0000        | 0.0000    |
| 6248 | 8029773 | IGFL2        | 0.0403     | 0.0000        | 0.0000        | 0.0000    |
| 6249 | 8020527 | C18orf8      | 0.0265     | 0.0000        | 0.0000        | -0.0402   |
| 6250 | 8094988 | CWH43        | 0.0400     | 0.0000        | 0.0000        | 0.0000    |
| 6251 | 8030212 | LIN7B        | 0.0000     | 0.0400        | 0.0000        | 0.0000    |
| 6252 | 7942527 | POLD3        | 0.0000     | -0.0399       | 0.0000        | 0.0068    |
| 6253 | 7903827 | FAM40A       | -0.0398    | 0.0000        | 0.0000        | 0.0000    |
| 6254 | 8007848 | MAPK8IP1     | 0.0397     | 0.0000        | 0.0000        | -0.0293   |
| 6255 | 7915444 | LEPRE1       | -0.0397    | 0.0000        | 0.0000        | 0.0000    |
| 6256 | 8126574 | YIPF3        | 0.0000     | 0.0000        | 0.0000        | -0.0397   |
| 6257 | 7983274 | PDIA3        | 0.0000     | 0.0000        | -0.0397       | 0.0000    |
| 6258 | 7932616 | ABI1         | 0.0000     | 0.0000        | 0.0396        | 0.0000    |
| 6259 | 8138728 | HOXA4        | 0.0131     | 0.0000        | -0.0396       | 0.0000    |
| 6260 | 8123658 | SLC22A23     | 0.0000     | 0.0000        | 0.0000        | 0.0396    |

| #    | ID      | Name     | SDHB.score | SDHD-AT.score | SDHD-HN.score | VHL.score |
|------|---------|----------|------------|---------------|---------------|-----------|
| 6261 | 8064502 | SNRPB    | 0.0000     | 0.0000        | 0.0000        | -0.0396   |
| 6262 | 8015757 | ---      | -0.0396    | 0.0000        | 0.0000        | 0.0150    |
| 6263 | 8112388 | TRIM23   | 0.0000     | 0.0000        | 0.0000        | -0.0395   |
| 6264 | 7981530 | GPR132   | 0.0000     | -0.0395       | 0.0351        | 0.0000    |
| 6265 | 8012197 | PLSCR3   | 0.0000     | 0.0000        | 0.0394        | 0.0000    |
| 6266 | 7971222 | MTRF1    | -0.0394    | 0.0000        | 0.0000        | 0.0000    |
| 6267 | 7934326 | MRPS16   | 0.0000     | 0.0000        | 0.0000        | -0.0393   |
| 6268 | 7996675 | THAP11   | 0.0000     | 0.0000        | 0.0000        | -0.0393   |
| 6269 | 7914750 | C1orf212 | -0.0392    | 0.0000        | 0.0000        | 0.0000    |
| 6270 | 7893905 | ---      | 0.0392     | 0.0000        | 0.0000        | 0.0000    |
| 6271 | 7893485 | ---      | 0.0089     | 0.0000        | -0.0392       | 0.0000    |
| 6272 | 8112666 | ---      | 0.0392     | 0.0000        | 0.0000        | 0.0000    |
| 6273 | 8129108 | ZUFSP    | -0.0391    | 0.0193        | 0.0000        | 0.0000    |
| 6274 | 7927786 | REEP3    | -0.0233    | 0.0000        | 0.0391        | 0.0000    |
| 6275 | 7996976 | WWP2     | -0.0390    | 0.0000        | 0.0000        | 0.0000    |
| 6276 | 8053059 | BOLA3    | 0.0000     | 0.0390        | 0.0000        | -0.0369   |
| 6277 | 7924405 | RAB3GAP2 | 0.0390     | 0.0000        | 0.0000        | 0.0000    |
| 6278 | 8164357 | NAIF1    | 0.0000     | 0.0000        | 0.0000        | -0.0389   |
| 6279 | 7904930 | GPR89B   | 0.0258     | 0.0000        | 0.0000        | -0.0389   |
| 6280 | 8021914 | ADNP2    | 0.0389     | 0.0000        | 0.0000        | -0.0123   |
| 6281 | 7895032 | ---      | -0.0245    | 0.0000        | 0.0000        | 0.0388    |
| 6282 | 8087409 | RHOA     | 0.0000     | 0.0000        | 0.0388        | 0.0000    |
| 6283 | 8078262 | UBE2E1   | 0.0000     | 0.0000        | 0.0387        | 0.0000    |
| 6284 | 8094271 | MED28    | 0.0000     | 0.0000        | 0.0000        | -0.0387   |
| 6285 | 7992147 | CACNA1H  | 0.0000     | 0.0000        | 0.0000        | 0.0387    |
| 6286 | 7906072 | ROBLD3   | 0.0105     | 0.0000        | 0.0000        | -0.0387   |
| 6287 | 8034297 | ---      | 0.0000     | 0.0000        | 0.0000        | -0.0386   |
| 6288 | 7962590 | RPAP3    | 0.0000     | 0.0207        | 0.0000        | -0.0386   |
| 6289 | 8114733 | ARAP3    | -0.0386    | 0.0000        | 0.0000        | 0.0221    |
| 6290 | 8072705 | RASD2    | -0.0033    | 0.0385        | 0.0000        | 0.0189    |
| 6291 | 7950597 | CLNS1A   | 0.0384     | 0.0000        | 0.0000        | -0.0174   |
| 6292 | 7951004 | C11orf75 | 0.0000     | -0.0384       | 0.0000        | 0.0264    |
| 6293 | 8023382 | MBD2     | -0.0054    | -0.0384       | 0.0000        | 0.0259    |
| 6294 | 8082012 | SLC15A2  | -0.0384    | 0.0000        | 0.0075        | 0.0009    |
| 6295 | 7967240 | VPS33A   | 0.0000     | 0.0383        | 0.0000        | 0.0000    |
| 6296 | 7903049 | CCDC18   | -0.0382    | 0.0000        | 0.0000        | 0.0367    |
| 6297 | 8082911 | NCK1     | 0.0000     | 0.0000        | 0.0382        | -0.0307   |
| 6298 | 7922550 | SEC16B   | 0.0000     | 0.0000        | 0.0000        | 0.0382    |
| 6299 | 8105311 | NDUFS4   | 0.0000     | 0.0000        | 0.0000        | -0.0381   |
| 6300 | 7919950 | PI4KB    | 0.0380     | 0.0000        | 0.0000        | -0.0182   |
| 6301 | 8114526 | DNAJC18  | 0.0000     | 0.0000        | 0.0000        | -0.0380   |
| 6302 | 7932023 | USP6NL   | -0.0380    | 0.0000        | 0.0000        | 0.0233    |
| 6303 | 8053869 | ADRA2B   | 0.0000     | 0.0000        | 0.0000        | 0.0380    |
| 6304 | 8140269 | PMS2L5   | 0.0378     | 0.0000        | 0.0000        | 0.0000    |
| 6305 | 8045136 | RAB6C    | 0.0377     | 0.0000        | 0.0000        | 0.0000    |
| 6306 | 7893551 | ---      | 0.0377     | 0.0000        | 0.0000        | 0.0000    |
| 6307 | 8159379 | TMEM141  | 0.0155     | 0.0000        | 0.0000        | -0.0377   |
| 6308 | 8087746 | ---      | 0.0000     | 0.0376        | 0.0000        | 0.0000    |
| 6309 | 8167322 | WDR13    | 0.0000     | 0.0000        | 0.0000        | -0.0376   |
| 6310 | 8079274 | TMEM42   | 0.0000     | 0.0000        | 0.0000        | -0.0375   |
| 6311 | 7920515 | UBE2Q1   | 0.0373     | 0.0000        | 0.0000        | 0.0000    |
| 6312 | 8000205 | NPIPL3   | 0.0000     | -0.0373       | 0.0000        | 0.0192    |
| 6313 | 8100378 | RPL21P44 | 0.0000     | 0.0000        | 0.0373        | 0.0000    |
| 6314 | 8140239 | PMS2L1   | 0.0373     | 0.0000        | 0.0000        | 0.0000    |
| 6315 | 8126566 | C6orf154 | 0.0000     | 0.0000        | -0.0373       | 0.0000    |
| 6316 | 8125059 | CLIC1    | -0.0372    | 0.0000        | 0.0241        | 0.0000    |
| 6317 | 7961503 | C12orf69 | -0.0372    | 0.0000        | 0.0000        | 0.0000    |
| 6318 | 8026564 | KLF2     | -0.0371    | 0.0000        | 0.0241        | 0.0000    |
| 6319 | 8055287 | FAM128A  | 0.0000     | 0.0370        | 0.0000        | 0.0000    |
| 6320 | 7895324 | ---      | 0.0000     | 0.0000        | 0.0000        | -0.0370   |
| 6321 | 7900710 | C1orf84  | -0.0368    | 0.0000        | 0.0000        | 0.0000    |
| 6322 | 7892703 | ---      | 0.0366     | 0.0000        | 0.0000        | 0.0000    |

| #    | ID      | Name      | SDHB.score | SDHD-AT.score | SDHD-HN.score | VHL.score |
|------|---------|-----------|------------|---------------|---------------|-----------|
| 6323 | 8161238 | RAB1C     | 0.0362     | 0.0000        | 0.0000        | -0.0366   |
| 6324 | 8168391 | CXorf50B  | 0.0366     | 0.0000        | -0.0215       | 0.0000    |
| 6325 | 7987454 | BMF       | 0.0000     | 0.0000        | 0.0000        | -0.0365   |
| 6326 | 8179827 | CLIC1     | -0.0365    | 0.0000        | 0.0275        | 0.0000    |
| 6327 | 7986428 | LOC400464 | 0.0000     | 0.0000        | 0.0000        | 0.0364    |
| 6328 | 8028756 | PSMC4     | 0.0000     | 0.0000        | 0.0000        | -0.0364   |
| 6329 | 8034202 | RAB3D     | 0.0000     | 0.0364        | 0.0000        | 0.0000    |
| 6330 | 7922137 | NME7      | 0.0000     | 0.0000        | -0.0321       | 0.0364    |
| 6331 | 8007197 | NKIRAS2   | 0.0000     | 0.0000        | 0.0000        | -0.0364   |
| 6332 | 8133633 | NSUN5B    | 0.0364     | 0.0000        | 0.0000        | 0.0000    |
| 6333 | 8135273 | ---       | 0.0000     | 0.0363        | 0.0000        | -0.0267   |
| 6334 | 7904853 | GPR89A    | 0.0363     | 0.0000        | 0.0000        | -0.0318   |
| 6335 | 8136388 | TMEM140   | -0.0362    | 0.0000        | 0.0193        | 0.0000    |
| 6336 | 8135114 | CUX1      | 0.0000     | 0.0000        | 0.0000        | -0.0362   |
| 6337 | 8118218 | CSNK2B    | 0.0000     | 0.0000        | 0.0000        | -0.0362   |
| 6338 | 8085026 | RPL35A    | 0.0000     | 0.0000        | 0.0000        | -0.0361   |
| 6339 | 7894596 | ---       | 0.0000     | 0.0306        | 0.0000        | -0.0361   |
| 6340 | 7983763 | MAPK6     | 0.0361     | 0.0000        | 0.0000        | -0.0198   |
| 6341 | 7894141 | ---       | -0.0360    | 0.0000        | 0.0000        | 0.0045    |
| 6342 | 7976000 | ADCK1     | 0.0000     | 0.0360        | -0.0078       | 0.0000    |
| 6343 | 8118863 | ANKS1A    | -0.0359    | 0.0000        | 0.0000        | 0.0000    |
| 6344 | 7899750 | FAM167B   | -0.0359    | 0.0000        | 0.0060        | 0.0000    |
| 6345 | 7892868 | ---       | 0.0000     | 0.0000        | -0.0358       | 0.0000    |
| 6346 | 7957611 | ---       | 0.0000     | 0.0358        | 0.0000        | 0.0000    |
| 6347 | 8172317 | SYN1      | 0.0148     | 0.0000        | 0.0000        | -0.0358   |
| 6348 | 7925128 | ---       | 0.0000     | 0.0000        | 0.0000        | -0.0358   |
| 6349 | 7930861 | CASC2     | 0.0000     | 0.0000        | 0.0000        | 0.0358    |
| 6350 | 8049552 | RBM44     | 0.0000     | 0.0000        | 0.0357        | 0.0000    |
| 6351 | 7901357 | ---       | 0.0000     | 0.0000        | 0.0000        | -0.0357   |
| 6352 | 7896540 | ---       | 0.0288     | 0.0000        | 0.0000        | -0.0357   |
| 6353 | 8180273 | ---       | 0.0357     | 0.0000        | 0.0000        | 0.0000    |
| 6354 | 7959995 | EP400     | 0.0000     | 0.0000        | 0.0000        | 0.0356    |
| 6355 | 8180279 | ---       | 0.0224     | 0.0000        | 0.0000        | -0.0356   |
| 6356 | 7977331 | C14orf79  | 0.0000     | 0.0000        | -0.0356       | 0.0000    |
| 6357 | 8076374 | NHP2L1    | 0.0000     | 0.0329        | 0.0000        | -0.0355   |
| 6358 | 7973727 | KIAA1305  | -0.0220    | 0.0000        | 0.0000        | 0.0354    |
| 6359 | 8029236 | MEGF8     | 0.0000     | 0.0000        | 0.0000        | -0.0353   |
| 6360 | 8028645 | MED29     | 0.0000     | 0.0000        | 0.0000        | -0.0352   |
| 6361 | 7894061 | ---       | 0.0000     | 0.0352        | 0.0000        | -0.0286   |
| 6362 | 8068833 | PDE9A     | 0.0000     | 0.0000        | 0.0000        | 0.0351    |
| 6363 | 7900609 | ERMAP     | -0.0351    | 0.0000        | 0.0000        | 0.0000    |
| 6364 | 7893181 | ---       | 0.0000     | 0.0000        | 0.0000        | -0.0350   |
| 6365 | 7944601 | ---       | 0.0000     | 0.0000        | 0.0349        | 0.0000    |
| 6366 | 8087568 | MON1A     | 0.0000     | 0.0000        | 0.0000        | -0.0348   |
| 6367 | 8164607 | FNBP1     | 0.0000     | -0.0314       | 0.0348        | 0.0000    |
| 6368 | 8150163 | ---       | 0.0000     | 0.0000        | -0.0348       | 0.0000    |
| 6369 | 7980381 | TMED8     | 0.0347     | 0.0000        | 0.0000        | 0.0000    |
| 6370 | 8074842 | FAM108A1  | 0.0000     | 0.0000        | 0.0000        | -0.0347   |
| 6371 | 7967337 | ABCB9     | 0.0323     | 0.0000        | 0.0000        | -0.0347   |
| 6372 | 8162902 | C9orf125  | 0.0000     | 0.0347        | -0.0002       | 0.0000    |
| 6373 | 8038117 | DBP       | 0.0346     | 0.0000        | 0.0000        | -0.0226   |
| 6374 | 7906995 | UCK2      | 0.0345     | 0.0000        | 0.0000        | 0.0000    |
| 6375 | 8034034 | KEAP1     | 0.0000     | 0.0345        | 0.0000        | 0.0000    |
| 6376 | 7895582 | ---       | 0.0000     | 0.0345        | 0.0000        | 0.0000    |
| 6377 | 8100001 | ---       | 0.0000     | 0.0000        | 0.0000        | 0.0344    |
| 6378 | 8172858 | IQSEC2    | 0.0000     | 0.0000        | 0.0000        | -0.0344   |
| 6379 | 7956088 | RAB5B     | 0.0000     | 0.0000        | 0.0000        | -0.0343   |
| 6380 | 8092627 | TBCCD1    | -0.0262    | 0.0000        | 0.0342        | 0.0000    |
| 6381 | 8013179 | ATPAF2    | 0.0002     | 0.0000        | 0.0000        | -0.0342   |
| 6382 | 7982703 | DISP2     | 0.0342     | 0.0000        | 0.0000        | -0.0094   |
| 6383 | 7990231 | ADPGK     | 0.0000     | 0.0000        | 0.0341        | 0.0000    |
| 6384 | 7954775 | ---       | 0.0000     | 0.0340        | 0.0000        | 0.0000    |

| #    | ID      | Name      | SDHB.score | SDHD-AT.score | SDHD-HN.score | VHL.score |
|------|---------|-----------|------------|---------------|---------------|-----------|
| 6385 | 7930577 | CASP7     | 0.0000     | 0.0000        | 0.0340        | 0.0000    |
| 6386 | 7903010 | RPL5      | -0.0340    | 0.0000        | 0.0000        | 0.0000    |
| 6387 | 7896186 | ---       | 0.0340     | 0.0000        | 0.0000        | 0.0000    |
| 6388 | 8105739 | ---       | 0.0000     | 0.0000        | 0.0000        | -0.0340   |
| 6389 | 8167924 | UBQLN2    | 0.0000     | 0.0340        | 0.0000        | -0.0236   |
| 6390 | 7963935 | DNAJC14   | 0.0333     | 0.0000        | 0.0000        | -0.0339   |
| 6391 | 7913918 | UBXN11    | -0.0339    | 0.0000        | 0.0000        | 0.0000    |
| 6392 | 7913571 | HNRNPR    | -0.0203    | 0.0000        | 0.0000        | 0.0338    |
| 6393 | 8009784 | MRPS7     | 0.0000     | 0.0338        | 0.0000        | -0.0208   |
| 6394 | 8112182 | MIER3     | 0.0000     | 0.0338        | 0.0000        | 0.0000    |
| 6395 | 8072729 | ---       | 0.0000     | 0.0338        | 0.0000        | 0.0000    |
| 6396 | 7939559 | TSPAN18   | -0.0282    | 0.0000        | 0.0338        | 0.0000    |
| 6397 | 8135688 | LSM8      | 0.0000     | 0.0000        | 0.0000        | -0.0337   |
| 6398 | 7971359 | ---       | 0.0000     | -0.0337       | 0.0000        | 0.0000    |
| 6399 | 8023868 | LOC400657 | 0.0000     | 0.0337        | 0.0000        | -0.0047   |
| 6400 | 7914021 | SLC9A1    | -0.0335    | 0.0000        | 0.0000        | 0.0234    |
| 6401 | 7989128 | CNOT6L    | 0.0000     | 0.0000        | 0.0000        | 0.0335    |
| 6402 | 8067094 | ZFP64     | 0.0334     | 0.0000        | 0.0000        | 0.0000    |
| 6403 | 8142740 | GCC1      | 0.0067     | 0.0000        | 0.0000        | -0.0334   |
| 6404 | 8078605 | C3orf35   | 0.0000     | 0.0000        | 0.0000        | -0.0333   |
| 6405 | 7991835 | ---       | 0.0000     | 0.0333        | 0.0000        | 0.0000    |
| 6406 | 7893733 | ---       | 0.0332     | 0.0000        | 0.0000        | 0.0000    |
| 6407 | 8084100 | USP13     | 0.0000     | 0.0000        | 0.0000        | 0.0332    |
| 6408 | 7950284 | RAB6A     | 0.0332     | 0.0000        | 0.0000        | 0.0000    |
| 6409 | 8021015 | PIK3C3    | -0.0009    | 0.0000        | 0.0000        | 0.0331    |
| 6410 | 8129728 | AHI1      | 0.0000     | 0.0000        | -0.0330       | 0.0049    |
| 6411 | 7985418 | LOC440297 | 0.0330     | 0.0000        | 0.0000        | 0.0000    |
| 6412 | 7962347 | ---       | 0.0000     | 0.0330        | 0.0000        | 0.0000    |
| 6413 | 8031495 | NAT14     | 0.0000     | 0.0329        | 0.0000        | 0.0000    |
| 6414 | 7895475 | ---       | 0.0329     | 0.0000        | 0.0000        | 0.0000    |
| 6415 | 7923483 | RABIF     | 0.0000     | 0.0000        | 0.0000        | -0.0329   |
| 6416 | 8118824 | ---       | 0.0000     | 0.0329        | 0.0000        | -0.0226   |
| 6417 | 8059019 | CRYBA2    | 0.0000     | 0.0000        | 0.0000        | 0.0329    |
| 6418 | 8037767 | PNMAL1    | 0.0329     | 0.0000        | 0.0000        | -0.0204   |
| 6419 | 8125383 | NOTCH4    | 0.0000     | 0.0000        | 0.0000        | 0.0328    |
| 6420 | 7964203 | BAZ2A     | 0.0000     | 0.0000        | -0.0326       | 0.0000    |
| 6421 | 8094974 | OCIAD1    | 0.0000     | 0.0326        | 0.0000        | 0.0000    |
| 6422 | 8040338 | ---       | 0.0000     | 0.0000        | 0.0000        | -0.0324   |
| 6423 | 8137310 | ABCB8     | 0.0324     | 0.0000        | 0.0000        | 0.0000    |
| 6424 | 7959212 | UNC119B   | 0.0000     | 0.0000        | -0.0323       | 0.0000    |
| 6425 | 8030844 | ---       | 0.0000     | 0.0000        | 0.0000        | -0.0323   |
| 6426 | 8064245 | TCEA2     | 0.0088     | 0.0000        | -0.0320       | 0.0000    |
| 6427 | 7945579 | CHID1     | 0.0000     | 0.0000        | 0.0000        | -0.0320   |
| 6428 | 7894052 | ---       | 0.0000     | 0.0000        | -0.0320       | 0.0000    |
| 6429 | 7928369 | SEC24C    | 0.0318     | 0.0000        | 0.0000        | 0.0000    |
| 6430 | 7895267 | ---       | 0.0000     | 0.0000        | 0.0000        | -0.0317   |
| 6431 | 8040753 | TMEM214   | 0.0317     | 0.0000        | 0.0000        | 0.0000    |
| 6432 | 8132943 | CCT6A     | 0.0000     | 0.0000        | 0.0000        | -0.0317   |
| 6433 | 8050474 | RDH14     | 0.0000     | 0.0000        | 0.0000        | -0.0316   |
| 6434 | 8093425 | IDUA      | 0.0000     | 0.0000        | 0.0000        | -0.0316   |
| 6435 | 7942289 | RNF121    | 0.0316     | 0.0000        | 0.0000        | 0.0000    |
| 6436 | 8096635 | NFKB1     | -0.0300    | -0.0200       | 0.0315        | 0.0278    |
| 6437 | 8132642 | PPIA      | 0.0000     | 0.0000        | 0.0000        | -0.0314   |
| 6438 | 7953333 | CD27      | 0.0000     | 0.0000        | 0.0314        | 0.0000    |
| 6439 | 8059244 | CHPF      | 0.0314     | 0.0000        | 0.0000        | -0.0209   |
| 6440 | 7919251 | GPR89B    | 0.0266     | 0.0000        | 0.0000        | -0.0314   |
| 6441 | 7966488 | C12orf51  | 0.0313     | 0.0000        | 0.0000        | 0.0000    |
| 6442 | 8086949 | CCDC51    | 0.0000     | 0.0000        | 0.0000        | -0.0312   |
| 6443 | 8132513 | ---       | 0.0000     | -0.0083       | 0.0000        | 0.0312    |
| 6444 | 8167797 | GNL3L     | 0.0000     | 0.0000        | 0.0000        | 0.0312    |
| 6445 | 8071676 | RAB36     | 0.0000     | 0.0000        | 0.0000        | 0.0311    |
| 6446 | 8068202 | C21orf63  | 0.0000     | 0.0310        | 0.0000        | 0.0000    |



| #    | ID      | Name     | SDHB.score | SDHD-AT.score | SDHD-HN.score | VHL.score |
|------|---------|----------|------------|---------------|---------------|-----------|
| 6447 | 8114320 | HNRNPA0  | 0.0000     | 0.0000        | 0.0000        | -0.0310   |
| 6448 | 8126035 | CPNE5    | -0.0002    | -0.0310       | 0.0183        | 0.0000    |
| 6449 | 8048195 | RPL37A   | 0.0000     | 0.0000        | 0.0000        | -0.0310   |
| 6450 | 7986969 | NDNL2    | 0.0000     | 0.0000        | -0.0310       | 0.0000    |
| 6451 | 7913001 | UBR4     | -0.0310    | 0.0000        | 0.0000        | 0.0000    |
| 6452 | 7898773 | EPHA8    | 0.0000     | 0.0000        | 0.0000        | 0.0309    |
| 6453 | 7893449 | ---      | -0.0036    | 0.0000        | 0.0000        | 0.0308    |
| 6454 | 7932132 | FRMD4A   | -0.0236    | -0.0165       | 0.0101        | 0.0306    |
| 6455 | 7923394 | ARL8A    | 0.0306     | 0.0000        | 0.0000        | 0.0000    |
| 6456 | 7894074 | ---      | 0.0305     | 0.0000        | -0.0043       | 0.0000    |
| 6457 | 7906652 | NIT1     | 0.0304     | 0.0000        | 0.0000        | 0.0000    |
| 6458 | 7894790 | ---      | -0.0304    | 0.0000        | 0.0000        | 0.0000    |
| 6459 | 7996361 | CES3     | 0.0303     | 0.0000        | 0.0000        | 0.0000    |
| 6460 | 8083576 | LEKR1    | 0.0000     | 0.0000        | 0.0000        | 0.0303    |
| 6461 | 7939590 | SLC35C1  | 0.0000     | 0.0000        | 0.0000        | -0.0301   |
| 6462 | 8061966 | RALY     | 0.0000     | 0.0000        | 0.0000        | -0.0301   |
| 6463 | 8037513 | EXOC3L2  | -0.0300    | 0.0000        | 0.0000        | 0.0000    |
| 6464 | 7993776 | LOC81691 | 0.0300     | 0.0000        | -0.0204       | 0.0000    |
| 6465 | 8077160 | ARSA     | 0.0000     | 0.0000        | 0.0000        | -0.0299   |
| 6466 | 8098762 | ATP5I    | 0.0000     | 0.0299        | 0.0000        | -0.0131   |
| 6467 | 8050367 | NBAS     | 0.0000     | 0.0000        | -0.0299       | 0.0000    |
| 6468 | 7893517 | ---      | 0.0000     | -0.0298       | 0.0000        | 0.0000    |
| 6469 | 7935647 | COX15    | 0.0298     | 0.0000        | 0.0000        | -0.0120   |
| 6470 | 7953150 | TEAD4    | 0.0000     | 0.0000        | 0.0298        | 0.0000    |
| 6471 | 8161056 | TLN1     | 0.0000     | -0.0297       | 0.0000        | 0.0000    |
| 6472 | 8180394 | ---      | 0.0000     | 0.0000        | 0.0000        | -0.0297   |
| 6473 | 8148888 | PPP1R16A | 0.0000     | 0.0000        | -0.0295       | 0.0000    |
| 6474 | 8085164 | SRGAP3   | 0.0295     | 0.0000        | 0.0000        | 0.0000    |
| 6475 | 7893808 | ---      | 0.0000     | 0.0295        | 0.0000        | 0.0000    |
| 6476 | 7935002 | SRP9     | 0.0295     | 0.0000        | 0.0000        | -0.0064   |
| 6477 | 8121300 | QRSL1    | 0.0000     | 0.0000        | 0.0000        | -0.0295   |
| 6478 | 7912303 | DFFA     | 0.0000     | 0.0294        | 0.0000        | 0.0000    |
| 6479 | 7973732 | KIAA0323 | 0.0000     | 0.0000        | 0.0000        | 0.0294    |
| 6480 | 7953569 | PTPN6    | -0.0294    | 0.0000        | 0.0000        | 0.0000    |
| 6481 | 8150797 | ATP6V1H  | 0.0000     | 0.0000        | 0.0000        | -0.0293   |
| 6482 | 8151090 | ---      | 0.0293     | 0.0000        | 0.0000        | 0.0000    |
| 6483 | 7907690 | TOR3A    | 0.0000     | 0.0000        | 0.0000        | -0.0293   |
| 6484 | 8093258 | IQCG     | -0.0292    | 0.0000        | 0.0000        | 0.0000    |
| 6485 | 8179298 | CSNK2B   | 0.0000     | 0.0000        | 0.0000        | -0.0291   |
| 6486 | 8000131 | NPIPL3   | 0.0000     | -0.0291       | 0.0000        | 0.0246    |
| 6487 | 8059731 | PDE6D    | 0.0000     | 0.0267        | 0.0000        | -0.0290   |
| 6488 | 7935810 | NDUFB8   | 0.0000     | 0.0000        | 0.0000        | -0.0290   |
| 6489 | 7906642 | KLHDC9   | 0.0168     | 0.0000        | -0.0290       | 0.0000    |
| 6490 | 7928770 | PCDH21   | 0.0000     | 0.0289        | -0.0238       | 0.0000    |
| 6491 | 7904869 | FAM108A1 | 0.0000     | 0.0024        | 0.0000        | -0.0288   |
| 6492 | 7991904 | PIGQ     | 0.0000     | 0.0179        | 0.0000        | -0.0287   |
| 6493 | 7910099 | SRP9     | 0.0286     | 0.0000        | 0.0000        | 0.0000    |
| 6494 | 8147040 | ZBTB10   | 0.0199     | 0.0000        | -0.0285       | 0.0000    |
| 6495 | 7919131 | ---      | -0.0285    | 0.0000        | 0.0000        | 0.0000    |
| 6496 | 7905481 | ---      | 0.0000     | 0.0192        | 0.0000        | -0.0285   |
| 6497 | 7894334 | ---      | 0.0000     | 0.0000        | 0.0284        | 0.0000    |
| 6498 | 8012423 | C17orf68 | 0.0283     | 0.0000        | 0.0000        | 0.0000    |
| 6499 | 7956257 | SPRYD4   | 0.0121     | 0.0000        | -0.0283       | 0.0000    |
| 6500 | 7900911 | DPH2     | -0.0282    | 0.0000        | 0.0000        | 0.0000    |
| 6501 | 8064716 | SIGLEC1  | -0.0281    | 0.0000        | 0.0112        | 0.0000    |
| 6502 | 7920944 | SMG5     | 0.0280     | 0.0000        | 0.0000        | -0.0057   |
| 6503 | 8063814 | LSM14B   | 0.0280     | 0.0000        | 0.0000        | 0.0000    |
| 6504 | 7962935 | PRKAG1   | 0.0000     | 0.0280        | 0.0000        | -0.0227   |
| 6505 | 8140280 | PMS2L2   | 0.0279     | 0.0000        | 0.0000        | 0.0000    |
| 6506 | 8159354 | EGFL7    | 0.0000     | 0.0000        | 0.0000        | 0.0279    |
| 6507 | 8005865 | SARM1    | 0.0278     | 0.0000        | 0.0000        | -0.0087   |
| 6508 | 8137865 | GNA12    | 0.0000     | 0.0000        | 0.0000        | -0.0278   |

| #    | ID      | Name      | SDHB.score | SDHD-AT.score | SDHD-HN.score | VHL.score |
|------|---------|-----------|------------|---------------|---------------|-----------|
| 6509 | 8016261 | MAPK8IP1  | 0.0277     | 0.0000        | 0.0000        | -0.0018   |
| 6510 | 7959131 | CCDC64    | 0.0276     | 0.0000        | 0.0000        | 0.0000    |
| 6511 | 8046360 | MAP1D     | 0.0000     | 0.0000        | 0.0000        | -0.0275   |
| 6512 | 7941425 | MUS81     | 0.0274     | 0.0000        | 0.0000        | 0.0000    |
| 6513 | 8064557 | FAM113A   | 0.0000     | 0.0000        | 0.0000        | -0.0274   |
| 6514 | 8005661 | CYTSB     | 0.0000     | 0.0000        | 0.0272        | 0.0000    |
| 6515 | 8180354 | ---       | 0.0272     | 0.0000        | 0.0000        | 0.0000    |
| 6516 | 8006229 | RNF135    | 0.0000     | -0.0272       | 0.0227        | 0.0000    |
| 6517 | 8061715 | KIF3B     | 0.0000     | 0.0000        | -0.0272       | 0.0000    |
| 6518 | 8117655 | ZNF193    | 0.0271     | 0.0000        | 0.0000        | 0.0000    |
| 6519 | 8055950 | ---       | 0.0000     | 0.0270        | 0.0000        | 0.0000    |
| 6520 | 8113023 | TMEM161B  | 0.0000     | 0.0000        | 0.0000        | -0.0270   |
| 6521 | 7905025 | DRD5      | 0.0270     | 0.0000        | 0.0000        | 0.0000    |
| 6522 | 7899244 | PIGV      | -0.0269    | 0.0000        | 0.0000        | 0.0000    |
| 6523 | 8087419 | AMT       | 0.0268     | 0.0000        | 0.0000        | 0.0000    |
| 6524 | 8096663 | CISD2     | 0.0268     | 0.0000        | 0.0000        | -0.0203   |
| 6525 | 7956930 | DYRK2     | 0.0000     | 0.0000        | 0.0268        | 0.0000    |
| 6526 | 7973036 | PARP2     | 0.0066     | 0.0000        | 0.0000        | -0.0267   |
| 6527 | 7974816 | SLC38A6   | 0.0000     | 0.0000        | 0.0000        | -0.0267   |
| 6528 | 8004247 | C17orf49  | 0.0000     | 0.0000        | 0.0267        | 0.0000    |
| 6529 | 8066757 | SLC13A3   | -0.0266    | 0.0000        | 0.0000        | 0.0169    |
| 6530 | 7981157 | C14orf139 | 0.0000     | 0.0000        | 0.0266        | 0.0000    |
| 6531 | 7944011 | REXO2     | 0.0000     | 0.0000        | 0.0265        | -0.0058   |
| 6532 | 7895613 | ---       | 0.0000     | 0.0265        | 0.0000        | 0.0000    |
| 6533 | 7905464 | C1orf230  | 0.0000     | 0.0265        | 0.0000        | 0.0000    |
| 6534 | 8154316 | UHRF2     | 0.0000     | -0.0264       | 0.0000        | 0.0021    |
| 6535 | 8103524 | TMEM192   | 0.0264     | 0.0000        | 0.0000        | -0.0054   |
| 6536 | 7906264 | PEAR1     | -0.0263    | 0.0000        | 0.0187        | 0.0000    |
| 6537 | 7901662 | TTC4      | -0.0263    | 0.0000        | 0.0000        | 0.0000    |
| 6538 | 8133331 | POM121    | 0.0262     | 0.0000        | 0.0000        | 0.0000    |
| 6539 | 7952309 | BLID      | 0.0000     | -0.0262       | 0.0040        | 0.0000    |
| 6540 | 8126629 | GTPBP2    | 0.0261     | 0.0000        | 0.0000        | 0.0000    |
| 6541 | 7907773 | TOR1AIP1  | 0.0000     | 0.0000        | 0.0000        | -0.0260   |
| 6542 | 7896599 | ---       | 0.0260     | 0.0000        | 0.0000        | 0.0000    |
| 6543 | 8077595 | BRPF1     | 0.0000     | 0.0000        | 0.0000        | -0.0259   |
| 6544 | 8031737 | ZNF548    | 0.0259     | 0.0000        | 0.0000        | 0.0000    |
| 6545 | 8078412 | CNOT10    | 0.0000     | 0.0000        | 0.0000        | -0.0258   |
| 6546 | 7905395 | PSMB4     | 0.0000     | 0.0000        | 0.0000        | -0.0257   |
| 6547 | 7950336 | C2CD3     | 0.0000     | -0.0256       | 0.0000        | 0.0000    |
| 6548 | 7896520 | ---       | 0.0000     | 0.0000        | -0.0256       | 0.0000    |
| 6549 | 8137332 | ABC8      | 0.0000     | 0.0000        | -0.0256       | 0.0000    |
| 6550 | 7899519 | YTHDF2    | -0.0255    | 0.0000        | 0.0000        | 0.0000    |
| 6551 | 7908867 | TMEM183A  | 0.0000     | 0.0000        | 0.0000        | -0.0255   |
| 6552 | 7923778 | ELK4      | 0.0000     | 0.0000        | 0.0254        | 0.0000    |
| 6553 | 8025998 | ZNF136    | -0.0254    | 0.0000        | 0.0000        | 0.0000    |
| 6554 | 7936439 | AFAP1L2   | 0.0000     | 0.0000        | 0.0000        | 0.0253    |
| 6555 | 8168553 | ---       | 0.0000     | 0.0252        | 0.0000        | 0.0000    |
| 6556 | 7973468 | LRRC16B   | 0.0252     | 0.0000        | 0.0000        | 0.0000    |
| 6557 | 8064766 | RNF24     | 0.0000     | 0.0000        | 0.0000        | 0.0251    |
| 6558 | 7972826 | C13orf29  | -0.0251    | 0.0000        | 0.0104        | 0.0000    |
| 6559 | 7896349 | ---       | 0.0000     | 0.0250        | 0.0000        | 0.0000    |
| 6560 | 7914923 | OSCP1     | -0.0250    | 0.0000        | 0.0000        | 0.0000    |
| 6561 | 8171392 | ASB9      | -0.0250    | 0.0000        | 0.0146        | 0.0000    |
| 6562 | 7901140 | MAST2     | 0.0000     | 0.0249        | 0.0000        | 0.0000    |
| 6563 | 7893114 | ---       | 0.0000     | -0.0249       | 0.0000        | 0.0000    |
| 6564 | 7913978 | GPN2      | -0.0249    | 0.0000        | 0.0000        | 0.0000    |
| 6565 | 8087119 | SLC26A6   | 0.0000     | 0.0000        | 0.0249        | 0.0000    |
| 6566 | 8048628 | TMEM198   | 0.0248     | 0.0000        | 0.0000        | 0.0000    |
| 6567 | 7893966 | ---       | 0.0000     | 0.0000        | 0.0000        | 0.0248    |
| 6568 | 7970858 | HMGB1     | -0.0248    | 0.0000        | 0.0000        | 0.0000    |
| 6569 | 8154227 | ---       | 0.0000     | -0.0207       | 0.0000        | 0.0247    |
| 6570 | 8125750 | RPL12     | 0.0000     | 0.0242        | 0.0000        | -0.0247   |

| #    | ID      | Name       | SDHB.score | SDHD-AT.score | SDHD-HN.score | VHL.score |
|------|---------|------------|------------|---------------|---------------|-----------|
| 6571 | 8152553 | TAF2       | 0.0000     | 0.0000        | 0.0000        | 0.0247    |
| 6572 | 7965423 | BTG1       | -0.0247    | 0.0000        | 0.0000        | 0.0000    |
| 6573 | 8180255 | ---        | 0.0000     | 0.0000        | -0.0247       | 0.0000    |
| 6574 | 8029182 | ZNF574     | 0.0245     | 0.0000        | 0.0000        | 0.0000    |
| 6575 | 8065016 | ---        | 0.0000     | 0.0245        | 0.0000        | -0.0029   |
| 6576 | 7894990 | ---        | 0.0244     | 0.0000        | 0.0000        | -0.0102   |
| 6577 | 8127977 | SYNCRIP    | 0.0000     | -0.0243       | 0.0000        | 0.0000    |
| 6578 | 8023312 | ---        | 0.0000     | 0.0000        | 0.0000        | -0.0243   |
| 6579 | 7947801 | PACSIN3    | 0.0000     | 0.0000        | -0.0243       | 0.0000    |
| 6580 | 7999384 | ---        | 0.0000     | -0.0100       | 0.0000        | 0.0242    |
| 6581 | 8003171 | COTL1      | -0.0242    | 0.0000        | 0.0000        | 0.0000    |
| 6582 | 7925662 | ZNF695     | 0.0242     | 0.0000        | 0.0000        | 0.0000    |
| 6583 | 8006984 | PSMD3      | 0.0000     | 0.0241        | 0.0000        | 0.0000    |
| 6584 | 7983132 | LOC645106  | -0.0240    | 0.0000        | 0.0187        | 0.0105    |
| 6585 | 8087778 | ---        | 0.0000     | 0.0000        | 0.0000        | -0.0240   |
| 6586 | 8016858 | COIL       | 0.0074     | 0.0000        | 0.0000        | -0.0240   |
| 6587 | 8150276 | PPAPDC1B   | 0.0239     | 0.0000        | 0.0000        | 0.0000    |
| 6588 | 7951614 | PPP2R1B    | 0.0239     | -0.0214       | 0.0000        | 0.0000    |
| 6589 | 8028112 | LRFN3      | 0.0000     | 0.0000        | 0.0000        | -0.0239   |
| 6590 | 7893997 | ---        | 0.0091     | 0.0000        | 0.0000        | -0.0238   |
| 6591 | 7919923 | LYSMD1     | 0.0238     | 0.0000        | -0.0210       | 0.0000    |
| 6592 | 8025237 | KIAA1543   | 0.0237     | 0.0000        | 0.0000        | -0.0202   |
| 6593 | 8007441 | RPL27      | 0.0000     | 0.0193        | 0.0000        | -0.0237   |
| 6594 | 8085255 | PRRT3      | 0.0000     | 0.0000        | 0.0000        | -0.0235   |
| 6595 | 8171193 | ---        | -0.0235    | 0.0000        | 0.0000        | 0.0162    |
| 6596 | 7925589 | SMYD3      | 0.0233     | 0.0000        | 0.0000        | 0.0000    |
| 6597 | 8132290 | ---        | 0.0233     | 0.0000        | 0.0000        | 0.0000    |
| 6598 | 8110169 | FAF2       | 0.0232     | 0.0000        | 0.0000        | 0.0000    |
| 6599 | 8158783 | NUP214     | 0.0000     | 0.0000        | 0.0000        | 0.0231    |
| 6600 | 8123364 | CCR6       | 0.0000     | 0.0000        | 0.0230        | 0.0000    |
| 6601 | 8115490 | ADAM19     | 0.0000     | -0.0228       | 0.0137        | 0.0000    |
| 6602 | 8095806 | ART3       | -0.0227    | 0.0000        | 0.0000        | 0.0226    |
| 6603 | 8048120 | ATIC       | 0.0227     | 0.0000        | 0.0000        | 0.0000    |
| 6604 | 7892599 | ---        | 0.0000     | 0.0000        | -0.0226       | 0.0000    |
| 6605 | 8160392 | IFNA16     | 0.0000     | 0.0226        | 0.0000        | 0.0000    |
| 6606 | 8149350 | DEFB134    | 0.0000     | -0.0225       | 0.0000        | 0.0000    |
| 6607 | 8113660 | ---        | 0.0225     | 0.0000        | 0.0000        | 0.0000    |
| 6608 | 8115756 | KCNMB1     | 0.0000     | -0.0224       | 0.0000        | 0.0000    |
| 6609 | 7932177 | CDNF       | 0.0000     | 0.0000        | -0.0223       | 0.0000    |
| 6610 | 8078650 | CTDSPL     | 0.0000     | 0.0000        | 0.0222        | 0.0000    |
| 6611 | 8162827 | ALG2       | 0.0000     | 0.0000        | -0.0222       | 0.0000    |
| 6612 | 7981958 | SNORD116-5 | 0.0000     | 0.0000        | 0.0000        | 0.0222    |
| 6613 | 8117382 | HIST1H2BD  | -0.0221    | 0.0000        | 0.0000        | 0.0188    |
| 6614 | 8002667 | PMFBP1     | 0.0220     | 0.0000        | 0.0000        | 0.0000    |
| 6615 | 7968883 | C13orf31   | -0.0220    | 0.0000        | 0.0000        | 0.0000    |
| 6616 | 7998280 | WDR24      | 0.0000     | 0.0000        | 0.0000        | -0.0220   |
| 6617 | 7905918 | EFNA3      | 0.0220     | 0.0000        | 0.0000        | 0.0000    |
| 6618 | 7980720 | TTC7B      | 0.0000     | 0.0000        | 0.0000        | -0.0219   |
| 6619 | 8148923 | LRRC14     | 0.0219     | 0.0000        | 0.0000        | 0.0000    |
| 6620 | 7937314 | ATHL1      | 0.0000     | 0.0000        | 0.0218        | 0.0000    |
| 6621 | 7898276 | ---        | 0.0000     | 0.0000        | 0.0000        | -0.0218   |
| 6622 | 8003679 | RPA1       | 0.0218     | 0.0000        | 0.0000        | -0.0104   |
| 6623 | 8088680 | C3orf64    | 0.0000     | -0.0216       | 0.0000        | 0.0000    |
| 6624 | 7919305 | PRKAB2     | 0.0148     | 0.0000        | 0.0000        | -0.0214   |
| 6625 | 8145914 | BAG4       | 0.0000     | 0.0000        | 0.0000        | -0.0213   |
| 6626 | 8063497 | CASS4      | 0.0000     | 0.0000        | 0.0212        | 0.0000    |
| 6627 | 8013696 | KIAA0100   | 0.0000     | 0.0000        | 0.0000        | 0.0211    |
| 6628 | 7914184 | PTAFR      | 0.0000     | 0.0000        | 0.0211        | 0.0000    |
| 6629 | 7949518 | FIBP       | 0.0000     | 0.0000        | 0.0000        | -0.0211   |
| 6630 | 7964646 | PPM1H      | 0.0210     | 0.0000        | 0.0000        | 0.0000    |
| 6631 | 7982535 | C15orf41   | 0.0210     | 0.0000        | 0.0000        | 0.0000    |
| 6632 | 7928524 | VDAC2      | 0.0209     | 0.0000        | 0.0000        | 0.0000    |

| #    | ID      | Name       | SDHB.score | SDHD-AT.score | SDHD-HN.score | VHL.score |
|------|---------|------------|------------|---------------|---------------|-----------|
| 6633 | 8038319 | HRC        | 0.0000     | 0.0000        | 0.0000        | 0.0208    |
| 6634 | 8168557 | SH3BGRL    | 0.0000     | 0.0000        | 0.0207        | 0.0000    |
| 6635 | 8053909 | SNRNP200   | 0.0206     | 0.0000        | 0.0000        | 0.0000    |
| 6636 | 8035829 | RPL34      | 0.0000     | 0.0000        | 0.0000        | -0.0206   |
| 6637 | 8055303 | NCRNA00164 | 0.0000     | 0.0206        | 0.0000        | 0.0000    |
| 6638 | 7963590 | CSAD       | 0.0000     | 0.0000        | 0.0000        | 0.0205    |
| 6639 | 8059996 | PER2       | -0.0205    | 0.0000        | 0.0056        | 0.0000    |
| 6640 | 8154476 | SH3GL2     | 0.0000     | 0.0000        | 0.0000        | -0.0204   |
| 6641 | 8001587 | KIFC3      | -0.0033    | 0.0000        | 0.0000        | 0.0204    |
| 6642 | 8037835 | SLC1A5     | 0.0000     | 0.0000        | 0.0203        | 0.0000    |
| 6643 | 8015607 | STAT3      | 0.0000     | -0.0201       | 0.0000        | 0.0000    |
| 6644 | 8061064 | ---        | 0.0201     | 0.0000        | 0.0000        | -0.0038   |
| 6645 | 8049998 | TMEM18     | 0.0201     | 0.0000        | 0.0000        | 0.0000    |
| 6646 | 8142899 | ZC3HC1     | 0.0029     | 0.0000        | 0.0000        | -0.0200   |
| 6647 | 7952484 | TMEM218    | 0.0200     | 0.0000        | 0.0000        | 0.0000    |
| 6648 | 8015737 | ---        | -0.0188    | 0.0000        | 0.0000        | 0.0199    |
| 6649 | 8043725 | ZAP70      | 0.0000     | 0.0000        | 0.0199        | 0.0000    |
| 6650 | 8138977 | DPY19L1    | 0.0000     | 0.0000        | 0.0000        | 0.0198    |
| 6651 | 7953229 | DYRK4      | 0.0000     | 0.0198        | 0.0000        | 0.0000    |
| 6652 | 8002941 | ADAMTS18   | 0.0000     | 0.0000        | 0.0198        | 0.0000    |
| 6653 | 8139392 | DDX56      | 0.0000     | 0.0000        | -0.0198       | 0.0000    |
| 6654 | 7895447 | ---        | 0.0000     | 0.0197        | 0.0000        | 0.0000    |
| 6655 | 8053165 | MRPL53     | 0.0000     | 0.0000        | 0.0000        | -0.0195   |
| 6656 | 8044111 | MRPS9      | 0.0000     | 0.0194        | 0.0000        | -0.0007   |
| 6657 | 8145083 | ---        | 0.0000     | -0.0193       | 0.0000        | 0.0000    |
| 6658 | 8173217 | ARHGEF9    | 0.0193     | 0.0000        | -0.0108       | 0.0000    |
| 6659 | 7912224 | SLC2A5     | 0.0000     | 0.0000        | 0.0193        | 0.0000    |
| 6660 | 7944262 | ---        | 0.0192     | 0.0000        | 0.0000        | 0.0000    |
| 6661 | 8132929 | GBAS       | 0.0000     | 0.0191        | 0.0000        | 0.0000    |
| 6662 | 8151030 | ---        | -0.0017    | 0.0000        | 0.0000        | 0.0191    |
| 6663 | 8079740 | STGC3      | 0.0000     | -0.0191       | 0.0000        | 0.0000    |
| 6664 | 8065738 | AHCY       | 0.0000     | 0.0190        | 0.0000        | 0.0000    |
| 6665 | 8112121 | SLC38A9    | -0.0190    | 0.0000        | 0.0000        | 0.0000    |
| 6666 | 8007228 | ATP6V0A1   | 0.0190     | 0.0000        | 0.0000        | 0.0000    |
| 6667 | 7899448 | MED18      | -0.0190    | 0.0000        | 0.0000        | 0.0000    |
| 6668 | 8023656 | KDSR       | 0.0000     | 0.0000        | 0.0000        | -0.0189   |
| 6669 | 8158204 | C9orf119   | 0.0000     | 0.0032        | 0.0000        | -0.0189   |
| 6670 | 8035956 | ---        | 0.0000     | 0.0000        | 0.0000        | -0.0188   |
| 6671 | 8053349 | LRRTM1     | 0.0000     | 0.0000        | -0.0146       | 0.0187    |
| 6672 | 8139943 | SPDYE7P    | 0.0186     | 0.0000        | 0.0000        | 0.0000    |
| 6673 | 7977987 | MYH6       | 0.0000     | 0.0000        | 0.0000        | 0.0183    |
| 6674 | 8134318 | CASD1      | 0.0000     | 0.0000        | -0.0165       | 0.0183    |
| 6675 | 8077770 | C3orf10    | 0.0000     | 0.0000        | 0.0000        | -0.0182   |
| 6676 | 8155572 | FAM27A     | 0.0000     | 0.0000        | -0.0111       | 0.0182    |
| 6677 | 7941732 | RCE1       | 0.0181     | 0.0000        | 0.0000        | 0.0000    |
| 6678 | 8064432 | FKBP1A     | -0.0181    | 0.0000        | 0.0000        | 0.0102    |
| 6679 | 8051637 | DHX57      | 0.0000     | 0.0000        | 0.0000        | 0.0180    |
| 6680 | 7948176 | TNKS1BP1   | 0.0180     | 0.0000        | 0.0000        | 0.0000    |
| 6681 | 8038407 | RRAS       | 0.0000     | 0.0000        | 0.0043        | -0.0179   |
| 6682 | 8057439 | ---        | 0.0000     | -0.0179       | 0.0000        | 0.0000    |
| 6683 | 8036636 | SIRT2      | 0.0000     | 0.0000        | 0.0000        | -0.0178   |
| 6684 | 7949717 | ---        | 0.0178     | 0.0000        | 0.0000        | 0.0000    |
| 6685 | 8165995 | HCCS       | 0.0000     | 0.0000        | 0.0000        | -0.0178   |
| 6686 | 7914630 | TRIM62     | 0.0000     | 0.0177        | 0.0000        | 0.0000    |
| 6687 | 8103516 | ---        | 0.0000     | 0.0000        | 0.0176        | 0.0000    |
| 6688 | 7999834 | ARL6IP1    | 0.0000     | 0.0000        | -0.0175       | 0.0000    |
| 6689 | 7893650 | ---        | 0.0000     | 0.0000        | -0.0174       | 0.0000    |
| 6690 | 8108861 | NDFIP1     | 0.0000     | 0.0000        | 0.0000        | -0.0173   |
| 6691 | 8036242 | ALKBH6     | 0.0000     | 0.0172        | 0.0000        | 0.0000    |
| 6692 | 8051989 | ATP6V1E2   | 0.0000     | 0.0000        | -0.0172       | 0.0000    |
| 6693 | 7999326 | USP7       | 0.0000     | -0.0171       | 0.0000        | 0.0000    |
| 6694 | 8109967 | ---        | 0.0000     | 0.0000        | 0.0000        | -0.0170   |

| #    | ID      | Name         | SDHB.score | SDHD-AT.score | SDHD-HN.score | VHL.score |
|------|---------|--------------|------------|---------------|---------------|-----------|
| 6695 | 8139534 | PKD1L1       | 0.0000     | 0.0000        | 0.0170        | 0.0000    |
| 6696 | 7940989 | ESRRA        | 0.0108     | 0.0000        | 0.0000        | -0.0169   |
| 6697 | 8053725 | DRD5         | 0.0169     | 0.0000        | 0.0000        | 0.0000    |
| 6698 | 8052562 | CCT4         | 0.0000     | 0.0000        | 0.0000        | -0.0168   |
| 6699 | 8028524 | ACTN4        | 0.0000     | -0.0167       | 0.0000        | 0.0000    |
| 6700 | 7976967 | ZNF839       | 0.0057     | 0.0000        | -0.0167       | 0.0000    |
| 6701 | 7991503 | LYSMD4       | 0.0167     | 0.0000        | 0.0000        | 0.0000    |
| 6702 | 8174684 | NKRF         | 0.0000     | 0.0000        | 0.0000        | -0.0166   |
| 6703 | 8031640 | ZNF583       | 0.0166     | 0.0000        | 0.0000        | 0.0000    |
| 6704 | 7938012 | TRIM6-TRIM34 | 0.0000     | 0.0000        | 0.0000        | 0.0166    |
| 6705 | 8100532 | C4orf14      | 0.0000     | 0.0000        | 0.0000        | -0.0165   |
| 6706 | 8142671 | WASL         | 0.0086     | 0.0000        | 0.0000        | -0.0165   |
| 6707 | 8069026 | C21orf33     | 0.0000     | 0.0165        | 0.0000        | 0.0000    |
| 6708 | 7981953 | SNORD116-3   | 0.0000     | 0.0000        | 0.0000        | 0.0164    |
| 6709 | 7971858 | ---          | 0.0000     | 0.0163        | 0.0000        | 0.0000    |
| 6710 | 7949674 | RBM4B        | 0.0162     | 0.0000        | 0.0000        | 0.0000    |
| 6711 | 7934870 | ATAD1        | 0.0000     | 0.0000        | 0.0000        | -0.0161   |
| 6712 | 8122827 | C6orf97      | 0.0000     | 0.0000        | 0.0000        | 0.0161    |
| 6713 | 7894012 | ---          | 0.0000     | 0.0000        | -0.0160       | 0.0000    |
| 6714 | 8141283 | PTCD1        | 0.0160     | 0.0000        | 0.0000        | 0.0000    |
| 6715 | 8108376 | ---          | 0.0000     | 0.0000        | 0.0159        | 0.0000    |
| 6716 | 7952129 | RPS25        | 0.0157     | 0.0000        | 0.0000        | 0.0000    |
| 6717 | 8118116 | MICB         | 0.0000     | 0.0000        | 0.0157        | 0.0000    |
| 6718 | 7970524 | ZDHHHC20     | -0.0156    | 0.0000        | 0.0000        | 0.0000    |
| 6719 | 8021047 | SETBP1       | 0.0000     | 0.0000        | 0.0154        | 0.0000    |
| 6720 | 8155596 | ---          | 0.0000     | 0.0154        | 0.0000        | -0.0136   |
| 6721 | 7939613 | MAPK8IP1     | 0.0154     | 0.0000        | 0.0000        | 0.0000    |
| 6722 | 7895531 | ---          | 0.0049     | -0.0153       | 0.0000        | 0.0000    |
| 6723 | 8168387 | CXorf50B     | 0.0152     | 0.0000        | 0.0000        | 0.0000    |
| 6724 | 7958216 | KIAA1033     | -0.0072    | 0.0000        | 0.0152        | 0.0000    |
| 6725 | 8067722 | STMN3        | 0.0000     | 0.0000        | 0.0000        | -0.0152   |
| 6726 | 8142230 | ---          | -0.0151    | 0.0000        | 0.0000        | 0.0070    |
| 6727 | 7928959 | PTEN         | -0.0150    | 0.0000        | 0.0000        | 0.0000    |
| 6728 | 7934301 | ECD          | 0.0149     | 0.0000        | 0.0000        | 0.0000    |
| 6729 | 7935572 | PYROXD2      | 0.0000     | 0.0000        | 0.0149        | 0.0000    |
| 6730 | 8011826 | C17orf87     | -0.0034    | 0.0000        | 0.0148        | 0.0000    |
| 6731 | 8027837 | CD22         | 0.0000     | 0.0000        | 0.0000        | 0.0147    |
| 6732 | 7991837 | NME4         | 0.0056     | 0.0000        | 0.0000        | -0.0147   |
| 6733 | 7999884 | ---          | 0.0000     | -0.0147       | 0.0000        | 0.0000    |
| 6734 | 8107920 | SLC22A5      | 0.0145     | 0.0000        | 0.0000        | 0.0000    |
| 6735 | 8032530 | SGTA         | 0.0000     | 0.0142        | 0.0000        | 0.0000    |
| 6736 | 7994386 | ATXN2L       | 0.0140     | 0.0000        | 0.0000        | 0.0000    |
| 6737 | 8172493 | KCND1        | 0.0139     | 0.0000        | 0.0000        | 0.0000    |
| 6738 | 8017019 | MTMR4        | 0.0139     | 0.0000        | 0.0000        | 0.0000    |
| 6739 | 7966127 | SELPLG       | 0.0000     | 0.0000        | 0.0139        | 0.0000    |
| 6740 | 8140915 | PEX1         | 0.0138     | 0.0000        | 0.0000        | 0.0000    |
| 6741 | 7931561 | ZNF511       | 0.0000     | 0.0000        | 0.0000        | -0.0138   |
| 6742 | 8108633 | PCDHAC1      | 0.0138     | 0.0000        | 0.0000        | 0.0000    |
| 6743 | 8033135 | GTF2F1       | 0.0000     | 0.0000        | 0.0000        | -0.0138   |
| 6744 | 7982230 | GOLGA9P      | 0.0137     | 0.0000        | 0.0000        | 0.0000    |
| 6745 | 7928800 | FAM190B      | 0.0000     | 0.0000        | 0.0000        | -0.0137   |
| 6746 | 7932725 | ---          | 0.0000     | 0.0136        | 0.0000        | 0.0000    |
| 6747 | 7955358 | C12orf62     | 0.0000     | 0.0136        | 0.0000        | 0.0000    |
| 6748 | 7893356 | ---          | 0.0000     | 0.0000        | 0.0000        | 0.0136    |
| 6749 | 8052689 | SPRED2       | 0.0000     | 0.0000        | 0.0000        | 0.0136    |
| 6750 | 7909898 | MIA3         | 0.0136     | 0.0000        | 0.0000        | 0.0000    |
| 6751 | 8013536 | NOS2         | 0.0000     | 0.0000        | 0.0000        | 0.0136    |
| 6752 | 7928890 | AGAP11       | 0.0000     | 0.0000        | 0.0000        | 0.0135    |
| 6753 | 8039655 | ZNF550       | 0.0134     | 0.0000        | 0.0000        | 0.0000    |
| 6754 | 8061184 | ---          | 0.0000     | 0.0000        | 0.0000        | -0.0134   |
| 6755 | 8012450 | SLC25A35     | 0.0132     | 0.0000        | 0.0000        | 0.0000    |
| 6756 | 8138950 | RP9          | 0.0000     | 0.0000        | 0.0000        | -0.0132   |

| #    | ID      | Name     | SDHB.score | SDHD-AT.score | SDHD-HN.score | VHL.score |
|------|---------|----------|------------|---------------|---------------|-----------|
| 6757 | 8170992 | SNORA56  | 0.0000     | 0.0000        | -0.0130       | 0.0000    |
| 6758 | 7899253 | ZDHHC18  | -0.0130    | 0.0000        | 0.0000        | 0.0000    |
| 6759 | 7921237 | FCRL5    | 0.0000     | 0.0000        | 0.0130        | 0.0000    |
| 6760 | 8167953 | ---      | 0.0000     | 0.0000        | -0.0129       | 0.0000    |
| 6761 | 8139264 | POLR2J4  | 0.0129     | 0.0000        | 0.0000        | 0.0000    |
| 6762 | 8100292 | FRYL     | 0.0000     | 0.0000        | 0.0000        | 0.0128    |
| 6763 | 8135275 | ---      | -0.0128    | 0.0000        | 0.0000        | 0.0000    |
| 6764 | 8025659 | ATG4D    | 0.0000     | 0.0127        | 0.0000        | -0.0038   |
| 6765 | 8135080 | AP1S1    | 0.0124     | 0.0000        | -0.0053       | 0.0000    |
| 6766 | 8084951 | LRRRC33  | 0.0000     | 0.0000        | 0.0122        | 0.0000    |
| 6767 | 8036938 | ADCK4    | 0.0122     | 0.0000        | 0.0000        | 0.0000    |
| 6768 | 8167314 | TBC1D25  | 0.0121     | 0.0000        | 0.0000        | 0.0000    |
| 6769 | 7994928 | PHKG2    | 0.0000     | 0.0000        | 0.0000        | -0.0120   |
| 6770 | 8000651 | SMG1     | 0.0000     | -0.0120       | 0.0000        | 0.0000    |
| 6771 | 8033479 | ELAVL1   | 0.0000     | 0.0000        | 0.0000        | -0.0119   |
| 6772 | 7998762 | DCI      | 0.0119     | 0.0000        | 0.0000        | 0.0000    |
| 6773 | 7913990 | GPATCH3  | 0.0000     | 0.0118        | 0.0000        | 0.0000    |
| 6774 | 8164521 | SH3GLB2  | 0.0109     | 0.0000        | -0.0118       | 0.0000    |
| 6775 | 7963696 | ---      | 0.0000     | 0.0000        | 0.0000        | 0.0118    |
| 6776 | 7934553 | ZNF503   | 0.0000     | 0.0000        | 0.0117        | 0.0000    |
| 6777 | 7973427 | THTPA    | 0.0117     | 0.0000        | 0.0000        | 0.0000    |
| 6778 | 8132531 | SPDYE1   | 0.0000     | 0.0000        | -0.0116       | 0.0000    |
| 6779 | 8035600 | TMEM161A | 0.0000     | 0.0000        | 0.0000        | -0.0116   |
| 6780 | 7987048 | MTMR10   | -0.0115    | 0.0000        | 0.0000        | 0.0000    |
| 6781 | 7900979 | RNF220   | 0.0000     | 0.0114        | 0.0000        | 0.0000    |
| 6782 | 8037144 | DEDD2    | 0.0000     | 0.0001        | 0.0000        | -0.0114   |
| 6783 | 8076677 | PHF21B   | 0.0113     | 0.0000        | 0.0000        | 0.0000    |
| 6784 | 8135204 | SPDYE2   | 0.0000     | 0.0000        | -0.0112       | 0.0000    |
| 6785 | 7895360 | ---      | 0.0000     | 0.0000        | 0.0000        | -0.0112   |
| 6786 | 8180277 | ---      | 0.0111     | 0.0000        | -0.0019       | 0.0000    |
| 6787 | 8007992 | KPNB1    | 0.0000     | 0.0000        | -0.0111       | 0.0000    |
| 6788 | 7973314 | OXA1L    | 0.0087     | 0.0000        | -0.0110       | 0.0000    |
| 6789 | 8173457 | ZMYM3    | 0.0109     | 0.0000        | 0.0000        | 0.0000    |
| 6790 | 7960383 | PARP11   | -0.0108    | 0.0000        | 0.0000        | 0.0000    |
| 6791 | 8062695 | SFRS6    | 0.0000     | 0.0000        | 0.0000        | 0.0107    |
| 6792 | 8022118 | EPB41L3  | 0.0036     | 0.0000        | 0.0000        | -0.0106   |
| 6793 | 7925182 | SNORA14B | 0.0105     | 0.0000        | 0.0000        | 0.0000    |
| 6794 | 7990273 | STOML1   | 0.0000     | 0.0104        | 0.0000        | 0.0000    |
| 6795 | 7961208 | MAGOHB   | -0.0103    | 0.0000        | 0.0000        | 0.0062    |
| 6796 | 8023528 | ALPK2    | 0.0102     | 0.0000        | 0.0000        | 0.0000    |
| 6797 | 7992043 | FAM173A  | 0.0102     | 0.0000        | 0.0000        | 0.0000    |
| 6798 | 8069340 | C21orf57 | 0.0000     | 0.0101        | 0.0000        | 0.0000    |
| 6799 | 8008706 | DYNLL2   | 0.0000     | 0.0099        | 0.0000        | 0.0000    |
| 6800 | 8042874 | TTC31    | 0.0000     | 0.0000        | 0.0000        | -0.0099   |
| 6801 | 7945944 | RHOG     | 0.0000     | 0.0000        | 0.0099        | 0.0000    |
| 6802 | 8141795 | POLR2J3  | 0.0098     | 0.0000        | 0.0000        | 0.0000    |
| 6803 | 8142774 | RBM28    | 0.0000     | 0.0000        | -0.0097       | 0.0000    |
| 6804 | 8118149 | LST1     | 0.0000     | 0.0000        | 0.0097        | 0.0000    |
| 6805 | 7896684 | ---      | 0.0000     | 0.0000        | 0.0000        | -0.0096   |
| 6806 | 7940798 | MARK2    | 0.0095     | 0.0000        | 0.0000        | 0.0000    |
| 6807 | 7923731 | DSTYK    | 0.0095     | 0.0000        | 0.0000        | 0.0000    |
| 6808 | 7962783 | ASB8     | 0.0000     | 0.0000        | 0.0000        | -0.0094   |
| 6809 | 7979906 | COX16    | 0.0000     | 0.0093        | 0.0000        | 0.0000    |
| 6810 | 8125172 | EHMT2    | 0.0091     | 0.0000        | 0.0000        | 0.0000    |
| 6811 | 7896600 | ---      | 0.0090     | 0.0000        | 0.0000        | 0.0000    |
| 6812 | 8094911 | ATP10D   | -0.0090    | 0.0000        | 0.0000        | 0.0047    |
| 6813 | 8075493 | PATZ1    | 0.0088     | 0.0000        | 0.0000        | 0.0000    |
| 6814 | 8060274 | THAP4    | 0.0000     | 0.0000        | 0.0000        | -0.0087   |
| 6815 | 8149907 | TRIM35   | 0.0000     | 0.0000        | 0.0000        | -0.0086   |
| 6816 | 7908525 | C1orf53  | 0.0000     | 0.0000        | -0.0086       | 0.0000    |
| 6817 | 7969815 | CLYBL    | 0.0086     | 0.0000        | 0.0000        | -0.0020   |
| 6818 | 7992552 | MLST8    | 0.0000     | 0.0000        | 0.0000        | -0.0085   |

| #    | ID      | Name     | SDHB.score | SDHD-AT.score | SDHD-HN.score | VHL.score |
|------|---------|----------|------------|---------------|---------------|-----------|
| 6819 | 7893420 | ---      | 0.0000     | 0.0000        | 0.0000        | -0.0085   |
| 6820 | 7898294 | ---      | -0.0084    | 0.0000        | 0.0000        | 0.0000    |
| 6821 | 8028233 | HKR1     | 0.0000     | 0.0000        | 0.0000        | 0.0084    |
| 6822 | 8008074 | CDK5RAP3 | 0.0000     | 0.0000        | 0.0000        | 0.0083    |
| 6823 | 7979757 | ZFYVE26  | 0.0082     | 0.0000        | 0.0000        | 0.0000    |
| 6824 | 8039306 | RDH13    | 0.0082     | 0.0000        | 0.0000        | 0.0000    |
| 6825 | 7904482 | SRGAP2   | 0.0000     | 0.0000        | 0.0082        | 0.0000    |
| 6826 | 8139896 | PMS2L4   | 0.0081     | 0.0000        | 0.0000        | 0.0000    |
| 6827 | 7949046 | TRPT1    | 0.0081     | 0.0000        | 0.0000        | 0.0000    |
| 6828 | 7895878 | ---      | 0.0000     | 0.0079        | 0.0000        | 0.0000    |
| 6829 | 8063410 | PARD6B   | 0.0078     | 0.0000        | 0.0000        | 0.0000    |
| 6830 | 8161004 | CD72     | 0.0000     | 0.0000        | 0.0078        | 0.0000    |
| 6831 | 7945084 | ---      | 0.0000     | 0.0000        | 0.0000        | 0.0077    |
| 6832 | 8108954 | TCERG1   | 0.0077     | 0.0000        | 0.0000        | 0.0000    |
| 6833 | 8125328 | AGPAT1   | 0.0000     | 0.0000        | 0.0000        | -0.0077   |
| 6834 | 8161745 | ---      | 0.0000     | 0.0000        | 0.0000        | -0.0077   |
| 6835 | 7911422 | SDF4     | -0.0075    | 0.0000        | 0.0000        | 0.0000    |
| 6836 | 7993800 | LYRM1    | 0.0075     | 0.0000        | 0.0000        | 0.0000    |
| 6837 | 7966301 | ANAPC7   | 0.0011     | 0.0000        | 0.0000        | -0.0074   |
| 6838 | 7974799 | MNAT1    | 0.0000     | 0.0000        | 0.0000        | -0.0074   |
| 6839 | 8103188 | PET112L  | 0.0000     | 0.0000        | 0.0000        | -0.0073   |
| 6840 | 8055208 | CCDC115  | 0.0000     | 0.0000        | 0.0000        | -0.0071   |
| 6841 | 7950370 | ---      | 0.0000     | -0.0071       | 0.0000        | 0.0034    |
| 6842 | 8031675 | ZNF71    | 0.0000     | 0.0000        | 0.0000        | -0.0070   |
| 6843 | 8180280 | ---      | 0.0070     | 0.0000        | 0.0000        | 0.0000    |
| 6844 | 7988963 | ARPP19   | 0.0000     | 0.0000        | 0.0000        | -0.0068   |
| 6845 | 7908635 | ---      | 0.0000     | 0.0068        | 0.0000        | 0.0000    |
| 6846 | 8050908 | HADHA    | 0.0000     | 0.0000        | 0.0000        | -0.0068   |
| 6847 | 8010924 | VPS53    | 0.0067     | -0.0059       | 0.0000        | 0.0000    |
| 6848 | 8114225 | H2AFY    | 0.0000     | 0.0000        | 0.0000        | -0.0066   |
| 6849 | 8092888 | TMEM44   | 0.0000     | 0.0000        | 0.0066        | 0.0000    |
| 6850 | 7990511 | PTPN9    | 0.0000     | 0.0000        | 0.0065        | 0.0000    |
| 6851 | 7974576 | NAT12    | 0.0000     | 0.0000        | 0.0000        | -0.0064   |
| 6852 | 8039131 | TFPT     | 0.0000     | 0.0000        | 0.0000        | -0.0064   |
| 6853 | 7995456 | HEATR3   | -0.0062    | 0.0000        | 0.0000        | 0.0000    |
| 6854 | 7944435 | HINFP    | 0.0062     | 0.0000        | 0.0000        | 0.0000    |
| 6855 | 7990528 | SNUPN    | 0.0000     | 0.0000        | 0.0000        | -0.0062   |
| 6856 | 8140739 | TP53TG1  | 0.0000     | 0.0000        | -0.0060       | 0.0000    |
| 6857 | 7893676 | ---      | 0.0060     | 0.0000        | 0.0000        | 0.0000    |
| 6858 | 8044686 | ACTR3    | 0.0000     | 0.0000        | 0.0058        | 0.0000    |
| 6859 | 7994267 | C1orf82  | 0.0000     | 0.0000        | 0.0000        | 0.0058    |
| 6860 | 7982812 | ZFYVE19  | 0.0000     | 0.0000        | 0.0000        | -0.0057   |
| 6861 | 7977452 | FLJ39632 | 0.0000     | 0.0000        | 0.0000        | 0.0056    |
| 6862 | 8067554 | TCFL5    | 0.0000     | 0.0000        | 0.0000        | -0.0056   |
| 6863 | 7896070 | ---      | 0.0000     | 0.0000        | 0.0000        | -0.0056   |
| 6864 | 7960516 | ---      | 0.0000     | 0.0055        | 0.0000        | 0.0000    |
| 6865 | 7959597 | TMED2    | 0.0054     | 0.0000        | 0.0000        | 0.0000    |
| 6866 | 8016159 | DCAKD    | 0.0000     | 0.0000        | -0.0052       | 0.0000    |
| 6867 | 8146857 | ---      | 0.0000     | 0.0000        | 0.0000        | -0.0052   |
| 6868 | 8028117 | ---      | 0.0000     | 0.0000        | 0.0000        | 0.0051    |
| 6869 | 7947570 | TP53I11  | 0.0000     | 0.0000        | 0.0000        | 0.0050    |
| 6870 | 8016552 | PHB      | 0.0000     | 0.0029        | 0.0000        | -0.0050   |
| 6871 | 8150844 | ---      | 0.0000     | 0.0000        | 0.0000        | -0.0048   |
| 6872 | 7935819 | MRPL43   | 0.0000     | 0.0000        | 0.0000        | -0.0048   |
| 6873 | 8031690 | ZNF264   | 0.0000     | 0.0047        | 0.0000        | 0.0000    |
| 6874 | 7906223 | C1orf66  | 0.0000     | 0.0000        | -0.0047       | 0.0000    |
| 6875 | 7977299 | KIAA0284 | 0.0046     | 0.0000        | 0.0000        | 0.0000    |
| 6876 | 8086880 | CDC25A   | 0.0000     | 0.0000        | 0.0000        | -0.0045   |
| 6877 | 8028806 | SPTBN4   | 0.0000     | 0.0000        | 0.0000        | -0.0045   |
| 6878 | 8074168 | FLJ39632 | 0.0000     | 0.0000        | 0.0000        | 0.0044    |
| 6879 | 8069633 | ATP5J    | 0.0000     | 0.0000        | 0.0000        | -0.0043   |
| 6880 | 8167835 | TRO      | 0.0042     | 0.0000        | -0.0037       | 0.0000    |

| #    | ID      | Name        | SDHB.score | SDHD-AT.score | SDHD-HN.score | VHL.score |
|------|---------|-------------|------------|---------------|---------------|-----------|
| 6881 | 7983145 | STARD9      | 0.0000     | 0.0000        | 0.0041        | 0.0000    |
| 6882 | 8078248 | HMGB1       | -0.0041    | 0.0000        | 0.0000        | 0.0000    |
| 6883 | 8106494 | BHMT2       | 0.0000     | 0.0000        | 0.0000        | 0.0039    |
| 6884 | 7904082 | ---         | 0.0000     | 0.0000        | 0.0000        | -0.0039   |
| 6885 | 7997281 | TERF2IP     | 0.0000     | 0.0039        | 0.0000        | 0.0000    |
| 6886 | 8180324 | ---         | 0.0038     | 0.0000        | 0.0000        | -0.0022   |
| 6887 | 7963880 | ITGA7       | -0.0036    | 0.0000        | 0.0000        | 0.0000    |
| 6888 | 8034555 | RTBDN       | 0.0000     | 0.0035        | 0.0000        | 0.0000    |
| 6889 | 7946201 | ARFIP2      | 0.0000     | 0.0000        | 0.0000        | -0.0034   |
| 6890 | 7972414 | ---         | -0.0033    | 0.0000        | 0.0000        | 0.0000    |
| 6891 | 8085138 | OXTR        | -0.0033    | 0.0000        | 0.0000        | 0.0000    |
| 6892 | 8061529 | REM1        | 0.0000     | 0.0000        | 0.0032        | 0.0000    |
| 6893 | 8137091 | ZNF398      | 0.0032     | 0.0000        | 0.0000        | 0.0000    |
| 6894 | 8156132 | ---         | 0.0000     | 0.0000        | -0.0031       | 0.0000    |
| 6895 | 7960124 | PGAM5       | 0.0000     | 0.0000        | 0.0000        | -0.0031   |
| 6896 | 8095159 | ---         | 0.0000     | 0.0000        | 0.0000        | 0.0031    |
| 6897 | 8055104 | SAP130      | 0.0030     | 0.0000        | 0.0000        | 0.0000    |
| 6898 | 8109585 | LSM11       | 0.0029     | 0.0000        | 0.0000        | 0.0000    |
| 6899 | 8010050 | FAM100B     | 0.0000     | 0.0000        | 0.0028        | 0.0000    |
| 6900 | 8050813 | DNMT3A      | 0.0000     | 0.0000        | -0.0026       | 0.0000    |
| 6901 | 8133016 | ---         | 0.0000     | 0.0026        | 0.0000        | 0.0000    |
| 6902 | 7981988 | SNORD116-20 | 0.0000     | 0.0025        | 0.0000        | 0.0000    |
| 6903 | 7902425 | ST6GALNAC3  | 0.0000     | 0.0000        | 0.0025        | 0.0000    |
| 6904 | 7983143 | STARD9      | 0.0000     | 0.0000        | 0.0000        | 0.0025    |
| 6905 | 8103695 | MFAP3L      | 0.0024     | 0.0000        | 0.0000        | 0.0000    |
| 6906 | 8069446 | ---         | 0.0000     | 0.0000        | 0.0000        | 0.0023    |
| 6907 | 8066818 | ---         | 0.0000     | 0.0023        | 0.0000        | 0.0000    |
| 6908 | 8011640 | MYBBP1A     | 0.0022     | 0.0000        | 0.0000        | 0.0000    |
| 6909 | 7893682 | ---         | 0.0000     | 0.0000        | -0.0022       | 0.0000    |
| 6910 | 7913380 | NBPF3       | 0.0000     | -0.0022       | 0.0000        | 0.0000    |
| 6911 | 7907024 | POGK        | 0.0021     | 0.0000        | 0.0000        | 0.0000    |
| 6912 | 8063097 | PCIF1       | 0.0000     | 0.0000        | 0.0000        | -0.0018   |
| 6913 | 8090420 | TPRA1       | 0.0000     | 0.0000        | 0.0000        | -0.0018   |
| 6914 | 8153890 | ZNF251      | -0.0018    | 0.0000        | 0.0000        | 0.0000    |
| 6915 | 7986325 | ---         | 0.0000     | 0.0018        | 0.0000        | 0.0000    |
| 6916 | 8028705 | TIMM50      | 0.0000     | 0.0000        | 0.0000        | -0.0016   |
| 6917 | 8130645 | PARK2       | 0.0000     | 0.0000        | 0.0000        | 0.0016    |
| 6918 | 7946380 | TRIM66      | -0.0016    | 0.0000        | 0.0000        | 0.0000    |
| 6919 | 8063949 | C20orf20    | 0.0014     | 0.0000        | 0.0000        | 0.0000    |
| 6920 | 8009561 | RPL38       | 0.0000     | 0.0000        | 0.0000        | -0.0012   |
| 6921 | 7895484 | ---         | 0.0000     | 0.0012        | 0.0000        | 0.0000    |
| 6922 | 7966851 | TAOK3       | 0.0000     | 0.0000        | 0.0011        | 0.0000    |
| 6923 | 8015846 | MPP3        | 0.0011     | 0.0000        | 0.0000        | -0.0003   |
| 6924 | 8089000 | CGGBP1      | 0.0000     | 0.0000        | 0.0000        | -0.0011   |
| 6925 | 8095832 | ---         | 0.0000     | 0.0011        | 0.0000        | 0.0000    |
| 6926 | 8029437 | PVR         | 0.0008     | 0.0000        | 0.0000        | 0.0000    |
| 6927 | 8134699 | COPS6       | 0.0007     | 0.0000        | 0.0000        | 0.0000    |
| 6928 | 8009008 | METTL2A     | 0.0007     | 0.0000        | 0.0000        | 0.0000    |
| 6929 | 8007885 | NSF         | 0.0000     | 0.0000        | -0.0004       | 0.0000    |
| 6930 | 7918188 | SLC25A24    | -0.0004    | 0.0000        | 0.0000        | 0.0000    |
| 6931 | 8054295 | ---         | 0.0000     | 0.0003        | 0.0000        | 0.0000    |
| 6932 | 8051820 | THADA       | 0.0000     | 0.0000        | 0.0000        | 0.0002    |
| 6933 | 8131339 | FSCN1       | 0.0000     | 0.0000        | 0.0002        | 0.0000    |
| 6934 | 7973303 | TRA@        | 0.0000     | -0.0002       | 0.0000        | 0.0000    |
| 6935 | 7966268 | GIT2        | 0.0000     | 0.0000        | 0.0000        | 0.0002    |
| 6936 | 8018445 | UNK         | 0.0001     | 0.0000        | 0.0000        | 0.0000    |
| 6937 | 8160718 | PTENP1      | -0.0001    | 0.0000        | 0.0000        | 0.0000    |



## Supplementary Table 2

### SDHB and SDHD-adrenal (upregulated pathways)

| #  | Ingenuity Canonical Pathways             | -log(p-value) | Ratio    | Molecules                                                                                          |
|----|------------------------------------------|---------------|----------|----------------------------------------------------------------------------------------------------|
| 1  | Oxidative Phosphorylation                | 5.78E00       | 8.48E-02 | ATP6V0E2,NDUFV1,NDUFS7,COX8A,ATP5L,SDHC,COX7A2L,ATP6AP1,ATP7A,NDUFB9,NDUFB11,NDUFS8,ATP6V1B2,ETNK2 |
| 2  | Alanine and Aspartate Metabolism         | 3.67E00       | 6.82E-02 | ABAT,ASRGL1,CRAT,GOT1,AARS,NARS2                                                                   |
| 3  | Mitochondrial Dysfunction                | 3.64E00       | 5.92E-02 | NDUFV1,NDUFB9,NDUFB11,NDUFS8,NDUFS7,PRDX5,COX8A,SDHC,COX7A2L,GPX4                                  |
| 4  | G Protein Signaling Mediated by Tubby    | 2.41E00       | 9.76E-02 | GNB5,PLCB3,GNG3,GNG4                                                                               |
| 5  | Butanoate Metabolism                     | 2.12E00       | 3.79E-02 | BDH1,ABAT,SDHC,DCXR,L2HGDH                                                                         |
| 6  | Aminoacyl-tRNA Biosynthesis              | 2.07E00       | 4.76E-02 | GARS,AARS,MARS,NARS2                                                                               |
| 7  | Nitrogen Metabolism                      | 1.83E00       | 3.01E-02 | CA10,ASRGL1,CA11,GLS2                                                                              |
| 8  | Glycine, Serine and Threonine Metabolism | 1.81E00       | 3.33E-02 | PSPH,GARS,PLCB3,GOT1,ETNK2                                                                         |
| 9  | Ubiquinone Biosynthesis                  | 1.78E00       | 4.2E-02  | NDUFV1,NDUFB9,NDUFB11,NDUFS8,NDUFS7                                                                |
| 10 | Keratan Sulfate Biosynthesis             | 1.74E00       | 7.55E-02 | FUT8,CHST7,B4GALT3,B3GNT1                                                                          |
| 11 | Citrate Cycle                            | 1.68E00       | 5.17E-02 | OGDHL,SDHC,IDH3A                                                                                   |
| 12 | Cell Cycle: G1/S Checkpoint Regulation   | 1.61E00       | 6.56E-02 | CDKN2A,CCNE1,CDK4,BTRC                                                                             |
| 13 | Sphingolipid Metabolism                  | 1.59E00       | 4.46E-02 | NEU1,GBA,SGPP2,SMPD1,LASS4                                                                         |
| 14 | Glutamate Metabolism                     | 1.41E00       | 3.85E-02 | ABAT,GOT1,GLS2                                                                                     |
| 15 | RAN Signaling                            | 1.41E00       | 8.7E-02  | KPNA2,TNPO1                                                                                        |
| 16 | Breast Cancer Regulation by Stathmin1    | 1.4E00        | 3.81E-02 | CCNE1,TUBG1,GNB5,PLCB3,UHMK1,PIK3R2,GNG3,GNG4                                                      |
| 17 | p53 Signaling                            | 1.38E00       | 5.05E-02 | CCNG1,CDKN2A,CDK4,PIK3R2,SERPINE2                                                                  |

### SDHD-HNP and VHL (upregulated pathways)

| #  | Ingenuity Canonical Pathways                            | -log(p-value) | Ratio    | Molecules                                                                                                          |
|----|---------------------------------------------------------|---------------|----------|--------------------------------------------------------------------------------------------------------------------|
| 1  | Hepatic Fibrosis / Hepatic Stellate Cell Activation     | 1.7E01        | 2.99E-01 | IGFBP4,FN1,CTGF,PDGFA,LEPR,IL1RL1,IL6,NFKB1,PGF,COL1A2,TGFBR2,IL1RL2,IGF1,CCL2,HGF,PDGFRA,ECE1,TNFRSF1B,IL1RAP,AGT |
| 2  | Role of Macrophages, Fibroblasts and Endothelial        | 9.98E00       | 1.6E-01  | SOCS3,PLCB2,TLR8,IL6,FCGR1A,ROCK2,IKBKB,PLCE1,TRAF3IP2,IL1RL2,PIK3CG,PLCB1,IL1RAP,PRKD3,TNFSF13B,ADAMTS4,SELE,C1S  |
| 3  | Complement System                                       | 8.52E00       | 4.17E-01 | SERPING1,C3,C1S,C1QC,C1QA,C1QB,C1R,C5AR1,C7,CFB,C4B(includes others),CFH,null,C3AR1,C2                             |
| 4  | Role of Pattern Recognition Receptors in Recognition of | 8.32E00       | 2.58E-01 | NLRP3,C3,OAS2,MYD88,TLR8,C1QC,C1QA,IL6,C1QB,NFKB1,PIK3R3,TLR2,TLR4,CLEC7A,C5AR1,TLR5,SYK,PIK3CG,CASP1,TLR7,TLR3,C3 |
| 5  | NF-κB Signaling                                         | 7.58E00       | 1.93E-01 | TGFBR3,TLR8,BMPR2,TNFAIP3,NFKB1,TGFBR2,IKBKB,PIK3CG,PDGFRA,TLR7,TLR3,TNFRSF1B,TNFSF13B,PDGFRB,EGFR,NRAS,MYD88      |
| 6  | Macropinocytosis Signaling                              | 6.77E00       | 2.5E-01  | MRC1/MRC1L1,NRAS,CDC42,PDGFA,USP6NL,ITGA5,CSF1R,PDGFB,PIK3R3,ITGB2,CSF1,PIK3CG,HGF,PLCG2,CD14,PRKCH,ITGB4,PDGF     |
| 7  | TREM1 Signaling                                         | 6.57E00       | 2.46E-01 | STAT5A,TLR8,ITGA5,IL6,NFKB1,TLR2,TLR4,IL18,CD40,CCL2,TLR5,PLCG2,CASP1,TLR7,CD86,TLR3,CASP5                         |
| 8  | Role of NFAT in Regulation of the Immune Response       | 6.56E00       | 1.63E-01 | FCGR2C,PLCB2,HLA-DOA,CD4,HLA-DMB,NFKB1,FCGR1A,IKBKB,GNB4,CD28,GNA15,PIK3CG,HLA-                                    |
| 9  | IL-10 Signaling                                         | 6.06E00       | 2.31E-01 | CCR1,FCGR2C,SOCS3,IL4R,JAK1,IL1RL1,FCGR2A,IL6,IL1R1,NFKB1,IL13,IKBKB,IL18,IL1RL2,IL10RA,IL10RB,CD14,IL1RAP         |
| 10 | T Helper Cell Differentiation                           | 5.96E00       | 2.5E-01  | IL6ST,HLA-DMA,IL4R,HLA-DOA,HLA-DMB,IL6,BCL6,TGFBR2,CD28,IL18,CD40,HLA-                                             |
| 11 | LXR/RXR Activation                                      | 5.95E00       | 2.04E-01 | MSR1,IL1RL1,CD36,IL6,IL1R1,NFKB1,IL33,TLR4,LY96,IL18,LDLR,IL1RL2,CCL2,CD14,PLTP,PTGS2,TLR3,TNFRSF1B,IL1RAP         |
| 12 | Altered T Cell and B Cell Signaling in Rheumatoid       | 5.7E00        | 2.17E-01 | HLA-DMA,HLA-DOA,TLR8,HLA-DMB,IL6,NFKB1,IL33,TLR2,CD28,TLR4,IL18,CD40,TLR5,CSF1,HLA-                                |
| 13 | Actin Cytoskeleton Signaling                            | 5.51E00       | 1.47E-01 | TMSL3,FN1,CDC42,F2R,PDGFA,ARHGEF7,IQGAP1,ROCK2,MYLK,PIK3CG,FGF12,FGF7,GNG12,null,ITGA4,NRAS,ITGA5,GSN,null,PDGFB,M |
| 14 | Dendritic Cell Maturation                               | 5.37E00       | 1.52E-01 | FCGR2C,HLA-DOA,LEPR,HLA-DMB,IL6,NFKB1,FCGR1A,COL1A2,IKBKB,PIK3CG,HLA-                                              |
| 15 | Axonal Guidance Signaling                               | 5.34E00       | 1.24E-01 | PLCB2,PTCH2,ROCK2,GNB4,GNA15,SEMA3D,ADAM28,PIK3CG,PLCB1,PRKD3,GNG12,ITGA4,KALRN,VEGFC,ITGA5,PPP3CC,PDGFB,MY        |
| 16 | Leukocyte Extravasation Signaling                       | 5.33E00       | 1.61E-01 | RAP1B,CLDN11,CDC42,MMP14,RHOH,ROCK2,TKX,PIK3CG,SIPA1,CYBB,CTNNB1,PRKD3,ITGA4,MMP19,TIMP3,ARHGAP6,THY1,MMP2,NC      |

**SDHD-HNP and VHL (upregulated pathways)**

| #  | Ingenuity Canonical Pathways                               | -log(p-value) | Ratio    | Molecules                                                                                                               |
|----|------------------------------------------------------------|---------------|----------|-------------------------------------------------------------------------------------------------------------------------|
| 17 | Toll-like Receptor Signaling                               | 5.27E00       | 2.55E-01 | MYD88,MAP3K1,TLR8,IRAK3,NFKB1,TLR2,TLR4,IKKBK,LY96,TLR5,TLR7,CD14,TLR3,IRAK4                                            |
| 18 | PKCθ Signaling in T Lymphocytes                            | 5.25E00       | 1.62E-01 | HLA-DMA,HLA-DOA,NRAS,MAP3K6,CD4,MAP3K1,HLA-DMB,PPP3CC,NFATC4,NFKB1,PIK3R3,CD28,IKKBK,VAV3,PIK3CG,PL                     |
| 19 | HGF Signaling                                              | 5.12E00       | 1.96E-01 | ETS1,RAP1B,NRAS,MAP3K6,CDC42,MAP3K1,ETS2,IL6,ELF1,PIK3R3,DOCK1,GAB1,PIK3CG,PLCG2,HGF,MAP3K8,PRKCH,PTGS2,PRKD3,E         |
| 20 | Atherosclerosis Signaling                                  | 5.12E00       | 1.83E-01 | SELE,MSR1,PDGFA,PLA2R1,CD36,IL6,NFKB1,PDGFB,COL1A2,IL33,PLA2G4A,ITGB2,IL18,CCL2,CD40,CSF1,CXCL12,ALOX5,PDGFD,ITGA4      |
| 21 | Phospholipase C Signaling                                  | 5.11E00       | 1.38E-01 | RAP1B,FCGR2C,PLCB2,ADCY4,ARHGEF7,NFKB1,RHOH,GNB4,PLCE1,AHNAK,HDAC7,PLCB1,PRKD3,GNG12,ITGA4,NRAS,FCGR2A,HDAC             |
| 22 | Systemic Lupus Erythematosus Signaling                     | 5.05E00       | 1.58E-01 | FCGR2C,IL6,FCGR1A,PTPRC,BDKRB2,CD28,PIK3CG,C7,TLR7,IGHM,FCGR1B,FCGR3A,TNFSF13B,NRAS,FCGR2A,IGKC,NFATC4,INPP5D,I         |
| 23 | Hepatic Cholestasis                                        | 4.91E00       | 1.45E-01 | IL1RL1,ADCY4,IL6,NFKB1,ATP8B1,SLCO1C1,IKKBK,IL1RL2,TNFRSF1B,IL1RAP,PRKD3,CYP7B1,MYD88,IL1R1,IRAK3,IL33,TLR4,LY96,IL18,A |
| 24 | Acute Phase Response Signaling                             | 4.9E00        | 1.58E-01 | IL6ST,SOCS3,TCF4,SERPING1,FN1,CP,IL6,NFKB1,C1R,IKKBK,F8,PIK3CG,CFB,TNFRSF1B,IL1RAP,AGT,NRAS,C3,MYD88,C1S,MAP3K1,SE      |
| 25 | IL-8 Signaling                                             | 4.85E00       | 1.5E-01  | PLCB2,NFKB1,RHOH,PGF,ROCK2,IKKBK,GNB4,PIK3CG,CYBB,PRKD3,TEK,GNG12,EGFR,NRAS,ANGPT1,FLT1,FLT4,VEGFC,RHOJ,MMP2,I          |
| 26 | iCOS-iCOSL Signaling in T Helper Cells                     | 4.59E00       | 1.68E-01 | HLA-DMA,HLA-DOA,CD4,HLA-DMB,PPP3CC,NFATC4,NFKB1,INPP5D,PTPRC,PIK3R3,CD28,IKKBK,C                                        |
| 27 | B Cell Development                                         | 4.57E00       | 2.97E-01 | IL7R,PTPRC,HLA-DMA,HLA-DOA,CD40,IGKC,HLA-DRA,CD86,IGHM,HLA-DMB,IGHD                                                     |
| 28 | Sphingosine-1-phosphate Signaling                          | 4.53E00       | 1.74E-01 | PLCB2,PDGFA,ADCY4,RHOJ,CASP4,RHOH,PDGFB,S1PR3,PIK3R3,PLCE1,PIK3CG,PLCG2,CASP1,PDGFRA,S1PR1,PLCB1,CASP8,PDGFD            |
| 29 | CD28 Signaling in T Helper Cells                           | 4.49E00       | 1.63E-01 | HLA-DMA,HLA-DOA,CDC42,CD4,MAP3K1,HLA-DMB,PPP3CC,NFATC4,NFKB1,PIK3R3,PTPRC,CD28,IKKBK,SYK,PIK3                           |
| 30 | G-Protein Coupled Receptor Signaling                       | 3.94E00       | 1.13E-01 | PLCB2,HTR2B,F2R,ADCY4,PTHLH,IKKBK,GPR77,GPR116,PDE7B,GPR4,GPR126,PIK3CG,PLCB1,CYSLTR2,SUCNR1,ADORA3,CMKLR1,CA           |
| 31 | Coagulation System                                         | 3.93E00       | 2.63E-01 | BDKRB2,F2R,F8,SERPINA5,F13A1,PLAU,TFPI,THBD,A2M,PLAT                                                                    |
| 32 | PPAR Signaling                                             | 3.92E00       | 1.7E-01  | STAT5A,NRAS,IL1RL1,PDGFA,IL1R1,NFKB1,PDGFB,NR2F1,IL33,IKKBK,IL18,IL1RL2,PDGFRA,PTGS2,TNFRSF1B,PDGFD,IL1RAP,PDGFRB       |
| 33 | PTEN Signaling                                             | 3.72E00       | 1.54E-01 | NRAS,CDC42,TGFBR3,FLT1,FLT4,BMPR2,ITGA5,NFKB1,INPP5D,TGFBR2,PIK3R3,IKKBK,MAG1,PIK3CG,KDR,PDGFRA,EGFR,ITGA4,PDGF         |
| 34 | PI3K Signaling in B Lymphocytes                            | 3.69E00       | 1.51E-01 | IL4R,PLCB2,C3,NRAS,PPP3CC,NFATC4,NFKB1,INPP5D,PTPRC,TLR4,IKKBK,PLCE1,CD180,CD40,VAV3,SYK,PIK3CG,PLCG2,ITPR3,PLCB1,      |
| 35 | Communication between Innate and Adaptive Immune Cells     | 3.66E00       | 1.56E-01 | CD4,TLR8,IL6,IL33,TLR2,CD28,TLR4,IL18,TLR5,CD40,HLA-DRA,FCER1G,TLR7,CD86,IGHA1,TLR3,TNFSF13B                            |
| 36 | Ephrin Receptor Signaling                                  | 3.65E00       | 1.31E-01 | RAP1B,CDC42,PDGFA,PGF,ROCK2,GNB4,EFNB2,GNA15,SORBS1,PIK3CG,GNG12,ITGA4,EPHB4,NRAS,KALRN,ANGPT1,ITGA5,VEGFC,nu           |
| 37 | Thrombin Signaling                                         | 3.61E00       | 1.35E-01 | PLCB2,F2R,CAMK1D,ADCY4,NFKB1,RHOH,MYLK,ROCK2,IKKBK,GNB4,PLCE1,GNA15,PIK3CG,PLCB1,PRKD3,GNG12,EGFR,NRAS,RHOJ,            |
| 38 | Natural Killer Cell Signaling                              | 3.61E00       | 1.64E-01 | NRAS,LAIR1,SH3BP2,LILRB1,INPP5D,CD300A,PIK3R3,KLRB1,KLRK1,PLCG2,PIK3CG,SYK,VAV3,FCER1G,VAV1,PRKCH,PRKD3,LCP2,FCG        |
| 39 | fMLP Signaling in Neutrophils                              | 3.61E00       | 1.47E-01 | PLCB2,NRAS,CDC42,PPP3CC,NFATC4,NFKB1,null,PPR1,PIK3R3,GNB4,PIK3CG,ITPR3,CYBB,PLCB1,NFATC2,PRKCH,FPR3,PRKD3,GNG12        |
| 40 | B Cell Receptor Signaling                                  | 3.6E00        | 1.46E-01 | ETS1,FCGR2C,NRAS,MAP3K6,CDC42,FCGR2A,MAP3K1,PPP3CC,NFATC4,NFKB1,BCL6,INPP5D,PTPRC,PIK3R3,IKKBK,GAB1,VAV3,SYK,PI         |
| 41 | Crosstalk between Dendritic Cells and Natural Killer Cells | 3.6E00        | 1.73E-01 | IL3RA,CD69,IL6,NFKB1,CD28,TLR4,IL18,CD40,KLRK1,HLA-DRA,CD226,CD209,TLR7,CD86,TLR3,TNFRSF1B,MICA                         |
| 42 | Role of Osteoblasts, Osteoclasts and Chondrocytes          | 3.59E00       | 1.28E-01 | TCF4,FRZB,IL1RL1,MMP14,BMPR2,IL6,NFKB1,IKKBK,null,IL1RL2,IGF1,PIK3CG,CTNNB1,TNFRSF1B,IL1RAP,ADAMTS4,BMP1,DLX5,ITGA5,I   |
| 43 | Endothelin-1 Signaling                                     | 3.57E00       | 1.35E-01 | PLCB2,ADCY4,PLA2R1,CASP4,NOS3,PLCE1,GNA15,PIK3CG,CASP1,PLCB1,ECE1,CASP8,PRKD3,CASP10,NRAS,EDNRB,PIK3R3,PLA2G4           |
| 44 | Colorectal Cancer Metastasis Signaling                     | 3.32E00       | 1.24E-01 | IL6ST,TCF4,JAK1,MMP14,ADCY4,TLR8,IL6,NFKB1,RHOH,PGF,TGFBR2,GNB4,PIK3CG,TLR7,TLR3,CTNNB1,GNG12,EGFR,MMP19,NRAS,VE        |
| 45 | Oncostatin M Signaling                                     | 3.31E00       | 2.57E-01 | IL6ST,TIMP3,STAT5A,EPAS1,JAK1,NRAS,MT2A,PLAU,JAK3                                                                       |
| 46 | PAK Signaling                                              | 3.28E00       | 1.5E-01  | NRAS,CDC42,PDGFA,ARHGEF7,ITGA5,PDGFB,MYL9,PIK3R3,MYLK,MYL12A,PIK3CG,ARHGEF6,PDGFRA,PDGFD,ITGA4,PDGFRB                   |
| 47 | Role of NFAT in Cardiac Hypertrophy                        | 3.19E00       | 1.23E-01 | IL6ST,PLCB2,CAMK1D,ADCY4,IL6,TGFBR2,GNB4,PLCE1,IGF1,PIK3CG,HDAC7,PLCB1,PRKD3,GNG12,NRAS,MAP3K1,HDAC1,NFATC4,PP          |
| 48 | Gα12/13 Signaling                                          | 3.12E00       | 1.48E-01 | NRAS,F2R,CDC42,MAP3K1,CDH6,NFKB1,CDH11,CDH19,MYL9,PIK3R3,ROCK2,IKKBK,MYL12A,CDH5,VAV3,PIK3CG,VAV1,MEF2C,CTNNB1          |
| 49 | Fcy Receptor-mediated Phagocytosis in Macrophages          | 3.07E00       | 1.57E-01 | CDC42,FCGR2A,FYB,FCGR1A,INPP5D,PIK3R3,DOCK1,PIK3CG,SYK,VAV3,HCK,PRKCH,VAV1,PRKD3,FCGR3A,LCP2                            |
| 50 | Clathrin-mediated Endocytosis Signaling                    | 3.03E00       | 1.35E-01 | EPS15,CDC42,F2R,PDGFA,VEGFC,SH3GLB1,ITGA5,PPP3CC,HIP1,PDGFB,PGF,PIK3R3,ITGB2,LDLR,IGF1,PIK3CG,FGF12,DAB2,FGF11,IT       |
| 51 | IL-6 Signaling                                             | 3.01E00       | 1.6E-01  | IL6ST,NRAS,IL1RL1,IL6,IL1R1,NFKB1,IL33,IKKBK,IL18,IL1RL2,CD14,HSPB7,TNFRSF1B,IL1RAP,A2M,HSPB1                           |

**SDHD-HNP and VHL (upregulated pathways)**

| #  | Ingenuity Canonical Pathways                              | -log(p-value) | Ratio    | Molecules                                                                                                           |
|----|-----------------------------------------------------------|---------------|----------|---------------------------------------------------------------------------------------------------------------------|
| 52 | Protein Kinase A Signaling                                | 2.95E00       | 1.14E-01 | RAP1B,PLCB2,TCF4,ADCY4,PDE1A,NOS3,NFKB1,PTCH2,MYLK,ROCK2,TGFBR2,GNB4,PLCE1,GLI3,PDE7B,PLCB1,CTNNB1,PRKD3,GNG1       |
| 53 | Graft-versus-Host Disease Signaling                       | 2.89E00       | 2E-01    | IL33,HLA-DMA,CD28,IL18,HLA-DOA,HLA-DRA,FCER1G,CD86,HLA-DMB,IL6                                                      |
| 54 | ILK Signaling                                             | 2.87E00       | 1.31E-01 | TMSL3,FN1,CDC42,NFKB1,RHOH,PGF,PPAP2B,PIK3CG,ITGB4,CTNNB1,null,PARVA,FBLIM1,SNAI1,VEGFC,VIM,RHOJ,PIK3R3,MYL9,ITGB2, |
| 55 | Cardiac Hypertrophy Signaling                             | 2.86E00       | 1.18E-01 | PLCB2,ADCY4,IL6,RHOH,ROCK2,TGFBR2,GNB4,CACNA1E,PLCE1,IGF1,GNA15,PIK3CG,PLCB1,GNG12,NRAS,MAP3K6,MAP3K1,RHOJ,NF       |
| 56 | IL-4 Signaling                                            | 2.85E00       | 1.71E-01 | HLA-DMA,IL4R,HLA-DOA,JAK1,NRAS,HLA-DMB,NFATC4,INPP5D,PIK3R3,PIK3CG,HLA-DRA,NFATC2,JAK3                              |
| 57 | PDGF Signaling                                            | 2.85E00       | 1.65E-01 | JAK1,NRAS,PDGFA,MAP3K1,INPP5D,PDGFB,PIK3R3,PLCG2,PIK3CG,PDGFRA,PDGFD,JAK3,PDGFRB                                    |
| 58 | Calcium-induced T Lymphocyte Apoptosis                    | 2.82E00       | 1.69E-01 | HLA-DMA,HLA-DOA,CD4,HLA-DRA,HDAC1,ITPR3,FCER1G,NFATC2,HLA-                                                          |
| 59 | T Cell Receptor Signaling                                 | 2.82E00       | 1.45E-01 | NRAS,CD4,MAP3K1,PPP3CC,NFATC4,NFKB1,PTPRC,PIK3R3,CD28,IKKBK,TXK,PIK3CG,VAV3,NFATC2,VAV1,LCP2                        |
| 60 | TNFR2 Signaling                                           | 2.53E00       | 2.12E-01 | IKKBK,null,MAP3K1,TNFAIP3,TNFRSF1B,NFKB1,TRAF1                                                                      |
| 61 | Angiopoietin Signaling                                    | 2.53E00       | 1.56E-01 | PIK3R3,IKKBK,STAT5A,TNIP1,NRAS,ANGPT1,PIK3CG,NOS3,NFKB1,ANGPTL1,TEK,TIE1                                            |
| 62 | CXCR4 Signaling                                           | 2.46E00       | 1.23E-01 | PLCB2,NRAS,ADCY4,CD4,RHOJ,null,RHOH,MYL9,PIK3R3,ROCK2,GNB4,DOCK1,MYL12A,GNA15,PIK3CG,CXCL12,ITPR3,PLCB1,PRKCH,P     |
| 63 | p38 MAPK Signaling                                        | 2.46E00       | 1.51E-01 | IL1RL1,IRAK3,IL1R1,TGFBR2,IL33,PLA2G4A,IL18,IL1RL2,DUSP1,MKNK1,HSPB7,MEF2C,TNFRSF1B,IL1RAP,IRAK4,HSPB1              |
| 64 | Production of Nitric Oxide and Reactive Oxygen Species in | 2.43E00       | 1.11E-01 | RAP1B,JAK1,MAP3K6,MAP3K1,RHOJ,NCF4,NFKB1,RHOH,PIK3R3,TLR2,TLR4,IKKBK,PIK3CG,PLCG2,CYBB,MAP3K8,PRKCH,IRF8,TNFRSF     |
| 65 | Glioblastoma Multiforme Signaling                         | 2.36E00       | 1.2E-01  | PLCB2,NRAS,CDC42,PDGFA,RHOJ,RHOH,PDGFB,PIK3R3,FZD4,PLCE1,IGF1,PLCG2,PIK3CG,ITPR3,PDGFRA,PLCB1,PDGFD,CTNNB1,PD       |
| 66 | Type I Diabetes Mellitus Signaling                        | 2.34E00       | 1.32E-01 | HLA-DMA,SOCS3,HLA-DOA,JAK1,MYD88,HLA-DMB,IL1R1,NFKB1,CD28,IKKBK,HLA-                                                |
| 67 | MSP-RON Signaling Pathway                                 | 2.33E00       | 1.76E-01 | TLR2,PIK3R3,ITGB2,TLR4,ITGAM,IL3RA,CCL2,CSF1,PIK3CG                                                                 |
| 68 | Nitric Oxide Signaling in the Cardiovascular System       | 2.28E00       | 1.26E-01 | FLT1,FLT4,VEGFC,NOS3,PGF,BDKRB2,PIK3R3,CACNA1E,PIK3CG,KDR,ITPR3,GUCY1A2,PRKAG2                                      |
| 69 | Cellular Effects of Sildenafil (Viagra)                   | 2.25E00       | 1.19E-01 | PLCB2,ADCY4,PDE4B,NOS3,PDE1A,MYL9,MYLK,MYL12A,CACNA1E,PLCE1,PLCG2,PDE1B,ITPR3,GUCY1A2,PRKAG2,PLCB1,MYH9,PDE5        |
| 70 | G Beta Gamma Signaling                                    | 2.25E00       | 1.17E-01 | NRAS,CDC42,null,GNB4,GNA15,PLCG2,PIK3CG,ARHGEF6,PRKAG2,PRKCH,CAV2,PRKD3,GNG12,EGFR                                  |
| 71 | IL-1 Signaling                                            | 2.25E00       | 1.31E-01 | MYD88,ADCY4,MAP3K1,IL1R1,IRAK3,NFKB1,null,IKKBK,GNB4,GNA15,PRKAG2,IL1RAP,GNG12,IRAK4                                |
| 72 | Fc Epsilon RI Signaling                                   | 2.23E00       | 1.36E-01 | NRAS,INPP5D,PIK3R3,PLA2G4A,GAB1,PLCG2,PIK3CG,SYK,VAV3,MS4A2,FCER1G,PRKCH,VAV1,PRKD3,LCP2                            |
| 73 | Inhibition of Angiogenesis by TSP1                        | 2.19E00       | 1.89E-01 | TGFBR2,HSPG2,THBS1,KDR,GUCY1A2,CD36,NOS3                                                                            |
| 74 | MIF-mediated Glucocorticoid Regulation                    | 2.19E00       | 1.71E-01 | TLR4,PLA2G4A,LY96,CD14,CD74,PTGS2,NFKB1                                                                             |
| 75 | Antigen Presentation Pathway                              | 2.18E00       | 1.86E-01 | HLA-DMA,HLA-DOA,HLA-DRA,HLA-DMB,CD74,HLA-DQA2,HLA-DPB1,HLA-DPA1                                                     |
| 76 | NF-κB Activation by Viruses                               | 2.13E00       | 1.41E-01 | PIK3R3,ITGB2,IKKBK,NRAS,CD4,PIK3CG,MAP3K1,ITGA5,PRKCH,NFKB1,PRKD3,ITGA4                                             |
| 77 | Relaxin Signaling                                         | 2.05E00       | 1.12E-01 | RAP1B,PDE9A,ADCY4,PDE4B,NOS3,PDE1A,NFKB1,null,PIK3R3,GNB4,GNA15,PDE7B,PIK3CG,PDE1B,GUCY1A2,PRKAG2,PDE5A,GNG12       |
| 78 | IL-9 Signaling                                            | 2.04E00       | 1.75E-01 | PIK3R3,SOCS3,STAT5A,JAK1,PIK3CG,NFKB1,JAK3                                                                          |
| 79 | Molecular Mechanisms of Cancer                            | 2.01E00       | 9.6E-02  | RAP1B,TCF4,PLCB2,JAK1,CDC42,ARHGEF7,ADCY4,BMPR2,NFKB1,RHOH,PTCH2,TGFBR2,null,GNA15,PIK3CG,PLCB1,CTNNB1,CASP8,P      |
| 80 | Glioma Signaling                                          | 1.97E00       | 1.21E-01 | NRAS,CAMK1D,PDGFA,PDGFB,PIK3R3,IGF1,PLCG2,PIK3CG,PDGFR A,PRKCH,PDGFD,PRKD3,EGFR,PDGFRB                              |
| 81 | Regulation of IL-2 Expression in Activated and Anergic T  | 1.95E00       | 1.33E-01 | TGFBR2,IKKBK,CD28,NRAS,PLCG2,VAV3,MAP3K1,NFATC2,VAV1,PPP3CC,NFATC4,NFKB1                                            |
| 82 | Integrin Signaling                                        | 1.93E00       | 1.12E-01 | RAP1B,PARVA,NRAS,CDC42,ARHGEF7,ITGA8,ITGA5,RHOJ,ITGA10,RHOH,null,PIK3R3,MYLK,ITGB2,DOCK1,MYL12A,WIPF1,ITGAM,PIK3    |
| 83 | Primary Immunodeficiency Signaling                        | 1.92E00       | 1.43E-01 | IL7R,PTPRC,CD40,CD4,IGKC,IGHM,IGHA1,JAK3,IGHD                                                                       |
| 84 | PI3K/AKT Signaling                                        | 1.91E00       | 1.13E-01 | JAK1,NRAS,ITGA5,NOS3,NFKB1,INPP5D,PIK3R3,IKKBK,GAB1,PIK3CG,MAP3K8,PTGS2,JAK3,CTNNB1,ITGA4,MCL1                      |
| 85 | Cholecystokinin/Gastrin-mediated Signaling                | 1.9E00        | 1.32E-01 | PLCB2,NRAS,RHOJ,RHOH,IL33,ROCK2,IL18,ITPR3,PLCB1,PRKCH,MEF2C,PTGS2,PRKD3,EGFR                                       |
| 86 | IL-15 Production                                          | 1.89E00       | 1.88E-01 | TXK,JAK1,IL6,NFKB1,JAK3,FRK                                                                                         |

**SDHD-HNP and VHL (upregulated pathways)**

| #   | Ingenuity Canonical Pathways                   | -log(p-value) | Ratio    | Molecules                                                                                                        |
|-----|------------------------------------------------|---------------|----------|------------------------------------------------------------------------------------------------------------------|
| 87  | IGF-1 Signaling                                | 1.86E00       | 1.3E-01  | IGFBP4,NRAS,CTGF,IGFBP5,IGFBP7,IGFBP2,GRB10,PIK3R3,NOV,IGF1,PIK3CG,PRKAG2,CYR61                                  |
| 88  | IL-3 Signaling                                 | 1.85E00       | 1.45E-01 | PIK3R3,STAT5A,JAK1,NRAS,IL3RA,PIK3CG,PRKCH,PPP3CC,PRKD3,INPP5D,null                                              |
| 89  | Nur77 Signaling in T Lymphocytes               | 1.77E00       | 1.41E-01 | HLA-DMA,CD28,HLA-DOA,HLA-DRA,HDAC1,FCER1G,CD86,HLA-DMB,PPP3CC                                                    |
| 90  | Autoimmune Thyroid Disease Signaling           | 1.76E00       | 1.31E-01 | HLA-DMA,CD28,HLA-DOA,CD40,HLA-DRA,FCER1G,CD86,HLA-DMB                                                            |
| 91  | CTLA4 Signaling in Cytotoxic T Lymphocytes     | 1.76E00       | 1.29E-01 | HLA-DMA,HLA-DOA,CD4,HLA-DMB,PIK3R3,CD28,PIK3CG,SYK,HLA-DRA,FCER1G,CD86,LCP2,PTPN22                               |
| 92  | HMGB1 Signaling                                | 1.76E00       | 1.29E-01 | SELE,NRAS,CDC42,RHOJ,IL1R1,NFKB1,RHOH,PIK3R3,TLR4,CCL2,PIK3CG,TNFRSF1B,PLAT                                      |
| 93  | Glioma Invasiveness Signaling                  | 1.72E00       | 1.5E-01  | PIK3R3,TIMP3,NRAS,F2R,PIK3CG,RHOJ,MMP2,PLAU,RHOH                                                                 |
| 94  | Death Receptor Signaling                       | 1.67E00       | 1.41E-01 | IKKBK,null,HSPB7,CFLAR,TNFRSF1B,CASP8,NFKB1,HSPB1,CASP10                                                         |
| 95  | MIF Regulation of Innate Immunity              | 1.66E00       | 1.43E-01 | TLR4,PLA2G4A,LY96,CD14,CD74,PTGS2,NFKB1                                                                          |
| 96  | B Cell Activating Factor Signaling             | 1.66E00       | 1.56E-01 | IKKBK,MAP3K1,NFATC2,NFATC4,NFKB1,TNFSF13B,TRAF1                                                                  |
| 97  | P2Y Purigenic Receptor Signaling Pathway       | 1.65E00       | 1.09E-01 | PLCB2,NRAS,ADCY4,NFKB1,null,PIK3R3,GNB4,PLCE1,PLCG2,PIK3CG,PRKAG2,PLCB1,PRKCH,PRKD3,GNG12                        |
| 98  | HER-2 Signaling in Breast Cancer               | 1.61E00       | 1.33E-01 | PIK3R3,ITGB2,NRAS,CDC42,PIK3CG,ERBB3,MMP2,PRKCH,ITGB4,PRKD3,EGFR                                                 |
| 99  | Aminosugars Metabolism                         | 1.57E00       | 8.46E-02 | FMO3,HK2,PDE7B,PDE9A,PDE1B,PDE5A,CMAH,PDE4B,PDE1A,GFP T2,NPL                                                     |
| 100 | G Protein Signaling Mediated by Tubby          | 1.56E00       | 1.46E-01 | GNB4,PLCB2,PLCG2,PLCB1,null,GNG12                                                                                |
| 101 | Neuregulin Signaling                           | 1.55E00       | 1.14E-01 | PIK3R3,STAT5A,ERBB2IP,NRAS,PLCG2,DCN,ITGA5,ERBB3,PRKCH,PRKD3,ITGA4,EGFR                                          |
| 102 | Renal Cell Carcinoma Signaling                 | 1.54E00       | 1.33E-01 | PIK3R3,ETS1,NRAS,CDC42,GAB1,PIK3CG,HGF,EGLN3,PDGFB,null                                                          |
| 103 | p70S6K Signaling                               | 1.53E00       | 1.13E-01 | IL4R,PLCB2,JAK1,NRAS,F2R,PIK3R3,PLCE1,PLCG2,PIK3CG,SYK,PLCB1,PRKCH,PRKD3,EGFR,AGT                                |
| 104 | Human Embryonic Stem Cell Pluripotency         | 1.5E00        | 1.02E-01 | TCF4,PDGFA,BMPR2,PDGFB,TGFBR2,PIK3R3,S1PR3,FZD4,PIK3CG,PDGFRA,S1PR1,BMP6,CTNNB1,PDGFD,BMP1,PDGFRB                |
| 105 | IL-12 Signaling and Production in Macrophages  | 1.48E00       | 1.02E-01 | MYD88,MAF,NFKB1,TLR2,PIK3R3,TLR4,IKKBK,IL18,CD40,PIK3CG,PRKCH,MAP3K8,IRF8,PRKD3                                  |
| 106 | LPS-stimulated MAPK Signaling                  | 1.46E00       | 1.22E-01 | PIK3R3,TLR4,IKKBK,NRAS,CDC42,PIK3CG,CD14,PRKCH,NFKB1,PRKD3                                                       |
| 107 | CCR3 Signaling in Eosinophils                  | 1.46E00       | 1.1E-01  | PLCB2,NRAS,null,ROCK2,MYLK,PIK3R3,PLA2G4A,GNB4,PIK3CG,ITPR3,PLCB1,PRKCH,PRKD3,GNG12                              |
| 108 | Germ Cell-Sertoli Cell Junction Signaling      | 1.45E00       | 1.07E-01 | NRAS,MAP3K6,CDC42,TJP1,MAP3K1,RHOJ,IQGAP1,GSN,RHOH,TGFBR2,PIK3R3,SORBS1,PPAP2B,PIK3CG,MAP3K8,CTNNB1,A2M,RAB8     |
| 109 | Allograft Rejection Signaling                  | 1.44E00       | 1.13E-01 | HLA-DMA,CD28,HLA-DOA,CD40,HLA-DRA,FCER1G,CD86,HLA-DMB,HLA-DQA2,HLA-DPB1,HLA-DPA1                                 |
| 110 | IL-15 Signaling                                | 1.42E00       | 1.29E-01 | PIK3R3,STAT5A,JAK1,NRAS,PIK3CG,SYK,AXL,NFKB1,JAK3                                                                |
| 111 | ERK/MAPK Signaling                             | 1.4E00        | 9.8E-02  | ETS1,RAP1B,NRAS,DUSP6,ETS2,ITGA5,ELF1,PIK3R3,DOCK1,PLA2G4A,DUSP1,PLCG2,PIK3CG,MKNK1,PRKAG2,HSPB7,ELK3,ITGA4,HSP  |
| 112 | Eicosanoid Signaling                           | 1.39E00       | 1.07E-01 | PLA2G4A,PTGIR,PLA2R1,CYSLTR1,HPGDS,PTGS2,ALOX5,TBXAS1,CYSLTR2                                                    |
| 113 | Renin-Angiotensin Signaling                    | 1.38E00       | 1.05E-01 | NRAS,ADCY4,MAP3K1,NFKB1,PIK3R3,CCL2,PLCG2,PIK3CG,ITPR3,PRKAG2,PRKCH,PRKD3,AGT                                    |
| 114 | Glucocorticoid Receptor Signaling              | 1.37E00       | 9.15E-02 | TAF4B,JAK1,IL6,NFKB1,CD163,FCGR1A,PGR,TGFBR2,IKKBK,POLR2A,CCL2,ANXA1,PIK3CG,AGT,STAT5A,SELE,NRAS,MAP3K1,NFATC4,P |
| 115 | Cdc42 Signaling                                | 1.36E00       | 1E-01    | HLA-DMA,HLA-DOA,CDC42,ITGA5,HLA-DMB,IQGAP1,HLA-DPA1,MYLK,MYL9,MYL12A,WIPF1,HLA-                                  |
| 116 | Leptin Signaling in Obesity                    | 1.36E00       | 1.18E-01 | PIK3R3,SOCS3,PLCB2,PLCE1,LEPR,PLCG2,ADCY4,PIK3CG,PRKAG2,PLCB1                                                    |
| 117 | IL-2 Signaling                                 | 1.35E00       | 1.31E-01 | PIK3R3,STAT5A,JAK1,NRAS,PIK3CG,SYK,IL2RA,JAK3                                                                    |
| 118 | Factors Promoting Cardiogenesis in Vertebrates | 1.34E00       | 1.16E-01 | TGFBR2,TCF4,FZD4,TGFBR3,BMPR2,MEF2C,PRKCH,BMP6,CTNNB1,PRKD3,BMP1                                                 |
| 119 | cAMP-mediated Signaling                        | 1.32E00       | 1.01E-01 | ADORA3,GPR17,APLN,PTGIR,HTR4,CAMK1D,PDE9A,ADCY4,DUSP6,PPP3CC,PDE4B,PDE1A,CHRM3,FPR1,S1PR3,AKAP13,P2RY14,PDE      |
| 120 | TNFR1 Signaling                                | 1.32E00       | 1.35E-01 | IKKBK,null,CDC42,MAP3K1,TNFAIP3,CASP8,NFKB1                                                                      |
| 121 | $\alpha$ -Adrenergic Signaling                 | 1.31E00       | 1.04E-01 | GNB4,NRAS,PLCG2,ADCY4,ITPR3,PRKAG2,PYGL,PRKCH,PRKD3,null,GNG12                                                   |
